# Supplementary material for: The Cis-regulatory Logic of the Mammalian Photoreceptor Transcriptional Network
Source: PLoS One. 2007 Jul 25;2(7):e643. doi: 10.1371/journal.pone.0000643 (PMC1916400; doi:10.1371/journal.pone.0000643)
Supplement: Table S2 — Genes dysregulated in Nr2e3-/-, Crx-/-, Nrl-/-, and Crx-/-; Nrl-/- under high stringency criteria. This list contains eight sub-lists of genes which met high stringency criteria for up- or downregulation in Nr2e3-/-, Crx-/-, Nrl-/-, and Crx-/-; Nrl-/- retinas (described in METHODS). The data for Nrl-/- were published previously [25] and are reproduced here for convenience. The microarray datasets for Nr2e3-/- were also published previously [20], but this analysis is new. Each sub-list is subdivided into three parts by color coding (taking Nrl-downregulated genes as an example): light green: genes whose average raw microarray score in the given mutant retina (score Nrl) is ≥5000; brown : 1000≤score Nrl<5000; and pink: 100≤scoreNrl<1000. "Nrl_ave" and "B6_ave" indicate the average scores for Nrl mutant and wild-type (C57BL/6) obtained for the indicated feature from three separate microarray experiments. Within each of the three sub-lists, genes are listed in order of their degree of change in the Nrl mutant retina (relative to wild-type) as indicated by the ratio of their average wt: Nrl ratios ("B6_ave/Nrl_ave"). The columns labeled "Additional Affy_IDs" contain additional Affymetrix microarray feature identifiers which correspond to the gene in question and which were also met our stringent criteria for upregulation in the Nrl mutant. (0.43 MB XLS) [file pone.0000643.s006.xls]

## Sheet: Nr2e3_D_Affy_only_annotated_new
Nr2e3-downregulated genes
Affy_ID	Nr2e3_ave	B6_ave	B6_ave/Nr2e3_ave	Gene symbol	Gene name	Additional Affy_IDs		Additional gene information
1437287_at	2679	6341	2.37	1110020G09Rik	RIKEN cDNA 1110020G09 gene			gb:BB277742 /DB_XREF=gi:15410953 /DB_XREF=BB277742 /CLONE=A930007D01 /FEA=EST /CNT=136 /TID=Mm.42110.2 /TIER=Stack /STK=10 /UG=Mm.42110 /LL=68646 /UG_GENE=1110020G09Rik /UG_TITLE=RIKEN cDNA 1110020G09 gene
1435096_at	2512	5397	2.15	Ric8b	Resistance to inhibitors of cholinesterase 8 homolog B (C. elegans)			gb:BB667093 /DB_XREF=gi:16398542 /DB_XREF=BB667093 /CLONE=4022435G01 /FEA=EST /CNT=31 /TID=Mm.18936.1 /TIER=Stack /STK=20 /UG=Mm.18936 /UG_TITLE=ESTs, Weakly similar to synembryn (Mus musculus) (M.musculus)
1435436_at	3090	6613	2.14	Epas1	Endothelial PAS domain protein 1			gb:BI647951 /DB_XREF=gi:15562187 /DB_XREF=603276037F1 /CLONE=IMAGE:5316560 /FEA=EST /CNT=46 /TID=Mm.87705.1 /TIER=Stack /STK=16 /UG=Mm.87705 /UG_TITLE=ESTs
1416203_at	112	1828	16.32	Aqp1	Aquaporin 1			gb:NM_007472.1 /DB_XREF=gi:6680709 /GEN=Aqp1 /FEA=FLmRNA /CNT=262 /TID=Mm.18625.1 /TIER=FL+Stack /STK=113 /UG=Mm.18625 /LL=11826 /DEF=Mus musculus aquaporin 1 (Aqp1), mRNA. /PROD=aquaporin 1 /FL=gb:NM_007472.1 gb:BC007125.1 gb:L02914.1
1435303_at	360	1599	4.44	Taf4b	TAF4B RNA polymerase II, TATA box binding protein (TBP)-associated factor			gb:AV373814 /DB_XREF=gi:15412259 /DB_XREF=AV373814 /CLONE=9130002C20 /FEA=EST /CNT=38 /TID=Mm.86376.1 /TIER=Stack /STK=10 /UG=Mm.86376 /LL=107058 /UG_GENE=AW987595 /UG_TITLE=expressed sequence AW987595
1445710_x_at	526	1708	3.25	1110051B16Rik	RIKEN cDNA 1110051B16 gene			gb:AV321065 /DB_XREF=gi:6290898 /DB_XREF=AV321065 /CLONE=6030430K23 /FEA=EST /CNT=3 /TID=Mm.80771.1 /TIER=ConsEnd /STK=2 /UG=Mm.80771 /UG_TITLE=ESTs
1442680_at	11	508	46.18	Ncam1	Neural cell adhesion molecule 1			gb:AW548716 /DB_XREF=gi:7194139 /DB_XREF=L0040E11-3 /CLONE=L0040E11 /FEA=EST /CNT=4 /TID=Mm.156925.1 /TIER=ConsEnd /STK=3 /UG=Mm.156925 /UG_TITLE=ESTs
1449393_at	40	265	6.63	Sh2d1a	SH2 domain protein 1A			gb:NM_011364.1 /DB_XREF=gi:6755493 /GEN=Sh2d1a /FEA=FLmRNA /CNT=19 /TID=Mm.20880.1 /TIER=FL+Stack /STK=12 /UG=Mm.20880 /LL=20400 /DEF=Mus musculus SH2 domain protein 1A (Sh2d1a), mRNA. /PROD=SH2 domain protein 1A /FL=gb:AF097633.1 gb:AF097632.1 gb:NM_011364.1 gb:AF072903.1
1417889_at	115	706	6.14	Apobec2	Apolipoprotein B editing complex 2			gb:NM_009694.1 /DB_XREF=gi:6753097 /GEN=Apobec2 /FEA=FLmRNA /CNT=73 /TID=Mm.27822.1 /TIER=FL+Stack /STK=34 /UG=Mm.27822 /LL=11811 /DEF=Mus musculus apolipoprotein B editing complex 2 (Apobec2), mRNA. /PROD=apolipoprotein B editing complex 2 /FL=gb:NM_009694.1 gb:AF161699.1
1435588_at	154	898	5.83	Wdfy1	WD repeat and FYVE domain containing 1	1437358_at		gb:BQ031098 /DB_XREF=gi:19766377 /DB_XREF=UI-1-CF0-alz-c-08-0-UI.s1 /CLONE=UI-1-CF0-alz-c-08-0-UI /FEA=EST /CNT=39 /TID=Mm.68868.1 /TIER=Stack /STK=15 /UG=Mm.68868 /UG_TITLE=ESTs
1429452_x_at	181	947	5.23	AK005333	Transcribed locus	1453144_at	1453145_at	gb:AK005333.1 /DB_XREF=gi:12837808 /FEA=mRNA /CNT=76 /TID=Mm.206757.1 /TIER=Stack /STK=20 /UG=Mm.206757 /LL=66776 /UG_GENE=4933439C20Rik /UG_TITLE=RIKEN cDNA 4933439C20 gene /DEF=Mus musculus adult male cerebellum cDNA, RIKEN full-length enriched library, clone:1500031O23:homolog to DJ858B16.2 (PHOSPHATIDYLSERINE DECARBOXYLASE (PSSC, EC 4.1.1.65)) (fragment), full insert sequence.
1457010_at	280	1106	3.95	3010001F23Rik	RIKEN cDNA 3010001F23 gene			gb:AW049649 /DB_XREF=gi:5910178 /DB_XREF=UI-M-BH1-and-g-09-0-UI.s1 /CLONE=UI-M-BH1-and-g-09-0-UI /FEA=EST /CNT=6 /TID=Mm.44979.1 /TIER=ConsEnd /STK=6 /UG=Mm.44979 /UG_TITLE=ESTs
Nr2e3-upregulated genes
Affy_ID	Nr2e3_ave	B6_ave	B6_ave/Nr2e3_ave	Gene symbol	Gene name	Additional Affy_IDs			Additional gene information
1451297_at	8088	522	0.06	Gulo	Gulonolactone (L-) oxidase				gb:BC019856.1 /DB_XREF=gi:18044344 /FEA=FLmRNA /CNT=95 /TID=Mm.26207.1 /TIER=FL+Stack /STK=40 /UG=Mm.26207 /DEF=Mus musculus, clone MGC:29968 IMAGE:5123684, mRNA, complete cds. /PROD=Unknown (protein for MGC:29968) /FL=gb:BC019856.1
1450830_a_at	17230	2386	0.14	Pde6c	Phosphodiesterase 6C, cGMP specific, cone, alpha prime				gb:NM_033614.1 /DB_XREF=gi:15809035 /GEN=Pde6c /FEA=FLmRNA /CNT=6 /TID=Mm.196971.1 /TIER=FL /STK=0 /UG=Mm.196971 /LL=110855 /DEF=Mus musculus phosphodiesterase 6C, cGMP specific, cone, alpha prime (Pde6c), mRNA. /PROD=phosphodiesterase 6C, cGMP specific, cone, alphaprime /FL=gb:AF411063.1 gb:NM_033614.1
1448602_at	7204	1055	0.15	Pygm	Muscle glycogen phosphorylase				gb:NM_011224.1 /DB_XREF=gi:6755255 /GEN=Pygm /FEA=FLmRNA /CNT=92 /TID=Mm.27806.1 /TIER=FL+Stack /STK=55 /UG=Mm.27806 /LL=19309 /DEF=Mus musculus muscle glycogen phosphorylase (Pygm), mRNA. /PROD=muscle glycogen phosphorylase /FL=gb:AF124787.1 gb:NM_011224.1 gb:BC012961.1
1436420_a_at	7777	1578	0.2	Ipo4	Importin 4	1450814_a_at			gb:BB390936 /DB_XREF=gi:9113881 /DB_XREF=BB390936 /CLONE=C230071O04 /FEA=EST /CNT=11 /TID=Mm.27546.5 /TIER=Stack /STK=9 /UG=Mm.27546 /LL=75751 /UG_GENE=8430408O15Rik /UG_TITLE=RIKEN cDNA 8430408O15 gene
1416444_at	5685	1155	0.2	Elovl2	Elongation of very long chain fatty acids (FEN1/Elo2, SUR4/Elo3, yeast)-like 2				gb:NM_019423.1 /DB_XREF=gi:9507146 /GEN=Elovl2 /FEA=FLmRNA /CNT=140 /TID=Mm.2567.1 /TIER=FL+Stack /STK=89 /UG=Mm.2567 /LL=54326 /DEF=Mus musculus elongation of very long chain fatty acids (FEN1Elo2, SUR4Elo3, yeast)-like 2 (Elovl2), mRNA. /PROD=sequence similarity to Cig30 2 /FL=gb:NM_019423.1 gb:AF170908.1
1422907_at	31411	6558	0.21	Gnat2	Guanine nucleotide binding protein, alpha transducing 2				gb:NM_008141.1 /DB_XREF=gi:6680042 /GEN=Gnat2 /FEA=FLmRNA /CNT=25 /TID=Mm.4805.1 /TIER=FL+Stack /STK=8 /UG=Mm.4805 /LL=14686 /DEF=Mus musculus guanine nucleotide binding protein, alpha transducing 2 (Gnat2), mRNA. /PROD=guanine nucleotide binding protein, alphatransducing 2 /FL=gb:NM_008141.1 gb:BC016272.1 gb:L10666.1
1428763_at	8769	2173	0.25	Smug1	Single-strand selective monofunctional uracil DNA glycosylase				gb:AK004735.1 /DB_XREF=gi:12836131 /GEN=Smug1 /FEA=mRNA /CNT=60 /TID=Mm.33583.1 /TIER=Stack /STK=22 /UG=Mm.33583 /LL=71726 /UG_TITLE=single-strand selective monofunctional uracil DNA glycosylase /DEF=Mus musculus adult male lung cDNA, RIKEN full-length enriched library, clone:1200013B09:single-strand selective monofunctional uracil DNA glycosylase, full insert sequence.
1450765_a_at	23557	6372	0.27	Pde6h	Phosphodiesterase 6H, cGMP-specific, cone, gamma	1450766_at			gb:NM_023898.1 /DB_XREF=gi:12963860 /GEN=Pde6h /FEA=FLmRNA /CNT=14 /TID=Mm.138001.1 /TIER=FL+Stack /STK=11 /UG=Mm.138001 /LL=78600 /DEF=Mus musculus phosphodiesterase 6H, cGMP-specific, cone, gamma (Pde6h), mRNA. /PROD=phosphodiesterase 6H, cGMP-specific, cone,gamma /FL=gb:AF190929.1 gb:NM_023898.1
1423631_at	15144	4040	0.27	Nr2e3	Nuclear receptor subfamily 2, group E, member 3				gb:BB540797 /DB_XREF=gi:15412216 /DB_XREF=BB540797 /CLONE=E130109K18 /FEA=FLmRNA /CNT=44 /TID=Mm.103641.1 /TIER=Stack /STK=8 /UG=Mm.103641 /LL=23958 /UG_GENE=Nr2e3 /UG_TITLE=nuclear receptor subfamily 2, group E, member 3 /FL=gb:NM_013708.1 gb:AF204053.1 gb:AF148129.1 gb:BC017521.1
1441330_at	7535	2076	0.28	Crb1	Crumbs homolog 1 (Drosophila)				gb:BG295465 /DB_XREF=gi:13057127 /DB_XREF=602392781F1 /CLONE=IMAGE:4504244 /FEA=EST /CNT=6 /TID=Mm.101073.1 /TIER=ConsEnd /STK=4 /UG=Mm.101073 /UG_TITLE=ESTs
1423420_at	5018	1385	0.28	Adrb1	Adrenergic receptor, beta 1				gb:AK018378.1 /DB_XREF=gi:12858051 /GEN=Adrb1 /FEA=FLmRNA /CNT=61 /TID=Mm.46797.1 /TIER=Stack /STK=42 /UG=Mm.46797 /LL=11554 /UG_TITLE=adrenergic receptor, beta 1 /DEF=Mus musculus 16 days embryo lung cDNA, RIKEN full-length enriched library, clone:8430404D20:adrenergic receptor, beta 1, full insert sequence. /FL=gb:NM_007419.1
1422612_at	8290	2841	0.34	Hk2	Hexokinase 2				gb:NM_013820.1 /DB_XREF=gi:7305142 /GEN=Hk2 /FEA=FLmRNA /CNT=60 /TID=Mm.2549.1 /TIER=FL+Stack /STK=27 /UG=Mm.2549 /LL=15277 /DEF=Mus musculus hexokinase 2 (Hk2), mRNA. /PROD=hexokinase 2 /FL=gb:NM_013820.1
1425784_a_at	9399	3769	0.4	Olfm1	Olfactomedin 1				gb:D78264.1 /DB_XREF=gi:3218527 /FEA=FLmRNA /CNT=5 /TID=Mm.43278.2 /TIER=FL /STK=1 /UG=Mm.43278 /LL=56177 /UG_GENE=Olfm1 /DEF=Mus musculus mRNA for pancortin-3, complete cds. /PROD=pancortin-3 /FL=gb:AF028740.1 gb:D78264.1
1449132_at	21454	8727	0.41	Opn1sw	Opsin 1 (cone pigments), short-wave-sensitive (color blindness, tritan)				gb:AF190670.1 /DB_XREF=gi:10504141 /FEA=FLmRNA /CNT=42 /TID=Mm.56987.1 /TIER=FL+Stack /STK=22 /UG=Mm.56987 /LL=12057 /UG_GENE=Opn1sw /DEF=Mus musculus blue opsin mRNA, complete cds. /PROD=blue opsin /FL=gb:BC026021.1 gb:AF190670.1 gb:U49720.1 gb:NM_007538.1
1448388_a_at	8107	3353	0.41	1110002B05Rik	RIKEN cDNA 1110002B05 gene				gb:NM_134054.1 /DB_XREF=gi:19527271 /GEN=1110002B05Rik /FEA=FLmRNA /CNT=172 /TID=Mm.30053.1 /TIER=FL+Stack /STK=80 /UG=Mm.30053 /LL=104725 /DEF=Mus musculus RIKEN cDNA 1110002B05 gene (1110002B05Rik), mRNA. /PROD=1110002B05Rik /FL=gb:BC022674.1 gb:NM_134054.1
1451580_a_at	6593	2815	0.43	Ttr	Transthyretin	1455913_x_at	1459737_s_at	1454608_x_at	gb:BC024702.1 /DB_XREF=gi:19354092 /FEA=FLmRNA /CNT=77 /TID=Mm.2108.2 /TIER=FL /STK=7 /UG=Mm.2108 /LL=22139 /UG_GENE=Ttr /DEF=Mus musculus, transthyretin, clone MGC:18651 IMAGE:4192268, mRNA, complete cds. /PROD=transthyretin /FL=gb:BC024702.1
1437912_at	9400	4126	0.44	Iqsec3	IQ motif and Sec7 domain 3				gb:AU067690 /DB_XREF=gi:4968427 /DB_XREF=AU067690 /CLONE=MNCb-0451 /FEA=EST /CNT=17 /TID=Mm.41815.1 /TIER=Stack /STK=13 /UG=Mm.41815 /UG_TITLE=ESTs
1423859_a_at	9182	4007	0.44	Ptgds	Prostaglandin D2 synthase (brain)				gb:AB006361.1 /DB_XREF=gi:2317285 /FEA=FLmRNA /CNT=130 /TID=Mm.1008.1 /TIER=FL+Stack /STK=89 /UG=Mm.1008 /LL=19215 /UG_GENE=Ptgds /DEF=Mus musculus mRNA for prostaglandin D synthetase, complete cds. /PROD=prostaglandin D synthetase /FL=gb:AB006361.1
1415903_at	6841	2986	0.44	Slc38a1	Solute carrier family 38, member 1	1454764_s_at			gb:NM_134086.1 /DB_XREF=gi:19527313 /GEN=Slc38a1 /FEA=FLmRNA /CNT=217 /TID=Mm.103568.1 /TIER=FL+Stack /STK=174 /UG=Mm.103568 /LL=105727 /DEF=Mus musculus solute carrier family 38, member 1 (Slc38a1), mRNA. /PROD=solute carrier family 38, member 1 /FL=gb:AF184240.2 gb:NM_134086.1
1417168_a_at	6053	2712	0.45	Usp2	Ubiquitin specific peptidase 2				gb:NM_016808.1 /DB_XREF=gi:7949157 /GEN=Usp2 /FEA=FLmRNA /CNT=113 /TID=Mm.12914.1 /TIER=FL+Stack /STK=54 /UG=Mm.12914 /LL=53376 /DEF=Mus musculus ubiquitin specific protease 2 (Usp2), mRNA. /PROD=ubiquitin-specific protease 2 /FL=gb:NM_016808.1 gb:BC017517.1 gb:AF079565.1
1450779_at	3761	118	0.03	Fabp7	Fatty acid binding protein 7, brain				gb:NM_021272.1 /DB_XREF=gi:10946571 /GEN=Fabp7 /FEA=FLmRNA /CNT=58 /TID=Mm.3644.1 /TIER=FL+Stack /STK=9 /UG=Mm.3644 /LL=12140 /DEF=Mus musculus fatty acid binding protein 7, brain (Fabp7), mRNA. /PROD=brain lipid binding protein /FL=gb:NM_021272.1
1421758_at	1431	49	0.03	Nat1	N-acetyltransferase 1 (arylamine N-acetyltransferase)				gb:NM_008673.1 /DB_XREF=gi:6679013 /GEN=Nat1 /FEA=FLmRNA /CNT=2 /TID=Mm.14125.1 /TIER=FL /STK=2 /UG=Mm.14125 /LL=17960 /DEF=Mus musculus N-acetyltransferase 1 (arylamine N-acetyltransferase) (Nat1), mRNA. /PROD=N-acetyl transferase 1, liver, blood /FL=gb:NM_008673.1 gb:U35885.1
1416306_at	3926	230	0.06	Clca3	Chloride channel calcium activated 3				gb:NM_017474.1 /DB_XREF=gi:8567335 /GEN=Clca3 /FEA=FLmRNA /CNT=164 /TID=Mm.6594.1 /TIER=FL+Stack /STK=100 /UG=Mm.6594 /LL=23844 /DEF=Mus musculus chloride channel calcium activated 3 (Clca3), mRNA. /PROD=chloride channel calcium activated 3 /FL=gb:NM_017474.1 gb:AB017156.1
1429036_at	3429	230	0.07	Otop3	Otopetrin 3				gb:AK009293.1 /DB_XREF=gi:12844000 /FEA=mRNA /CNT=16 /TID=Mm.101844.1 /TIER=Stack /STK=14 /UG=Mm.101844 /LL=69602 /UG_GENE=2310011E08Rik /UG_TITLE=RIKEN cDNA 2310011E08 gene /DEF=Mus musculus adult male tongue cDNA, RIKEN full-length enriched library, clone:2310011E08:hypothetical protein, full insert sequence.
1433649_at	4131	487	0.12	Aof1	Amine oxidase, flavin containing 1				gb:BM243793 /DB_XREF=gi:17879063 /DB_XREF=K0702A02-3 /CLONE=K0702A02 /FEA=EST /CNT=85 /TID=Mm.31259.1 /TIER=Stack /STK=77 /UG=Mm.31259 /LL=105190 /UG_GENE=AI482520 /UG_TITLE=expressed sequence AI482520
1426454_at	2763	321	0.12	Arhgdib	Rho, GDP dissociation inhibitor (GDI) beta				gb:AK002516.1 /DB_XREF=gi:12832553 /GEN=Arhgdib /FEA=FLmRNA /CNT=86 /TID=Mm.2241.1 /TIER=Stack /STK=15 /UG=Mm.2241 /LL=11857 /UG_TITLE=Rho, GDP dissociation inhibitor (GDI) beta /DEF=Mus musculus adult male kidney cDNA, RIKEN full-length enriched library, clone:0610011A23:rho, GDP dissociation inhibitor (GDI) beta, full insert sequence. /FL=gb:L07918.1
1436093_at	2748	342	0.12	Epha10	Eph receptor A10				gb:BE981269 /DB_XREF=gi:10650199 /DB_XREF=UI-M-CG0p-bda-c-04-0-UI.s1 /CLONE=UI-M-CG0p-bda-c-04-0-UI /FEA=EST /CNT=13 /TID=Mm.39121.1 /TIER=Stack /STK=11 /UG=Mm.39121 /UG_TITLE=ESTs
1433854_at	1716	216	0.13	AW547186	Expressed sequence AW547186	1454741_s_at			gb:BG064061 /DB_XREF=gi:12546624 /DB_XREF=H3015A12-3 /CLONE=H3015A12 /FEA=EST /CNT=100 /TID=Mm.39995.1 /TIER=Stack /STK=56 /UG=Mm.39995 /LL=102952 /UG_GENE=AI852450 /UG_TITLE=expressed sequence AI852450
1454770_at	2290	363	0.16	Cckbr	Cholecystokinin B receptor	1460663_at			gb:AV221910 /DB_XREF=gi:15404818 /DB_XREF=AV221910 /CLONE=3632432P12 /FEA=EST /CNT=52 /TID=Mm.44513.2 /TIER=Stack /STK=52 /UG=Mm.44513 /LL=12426 /UG_GENE=Cckbr /UG_TITLE=cholecystokinin B receptor
1424143_a_at	1547	255	0.16	Ris2	Retroviral integration site 2	1424144_at			gb:AF477481.1 /DB_XREF=gi:18958524 /FEA=FLmRNA /CNT=113 /TID=Mm.21873.1 /TIER=FL+Stack /STK=50 /UG=Mm.21873 /LL=67177 /UG_GENE=Ris2 /DEF=Mus musculus CDT1 protein mRNA, complete cds. /PROD=CDT1 protein /FL=gb:AF477481.1
1416961_at	4852	819	0.17	Bub1b	Budding uninhibited by benzimidazoles 1 homolog, beta (S. cerevisiae)	1447363_s_at			gb:NM_009773.1 /DB_XREF=gi:6753211 /GEN=Bub1b /FEA=FLmRNA /CNT=92 /TID=Mm.29133.1 /TIER=FL+Stack /STK=62 /UG=Mm.29133 /LL=12236 /DEF=Mus musculus budding uninhibited by benzimidazoles 1 homolog, beta (S. cerevisiae) (Bub1b), mRNA. /PROD=budding uninhibited by benzimidazoles 1 homolog,beta (S. cerevisiae) /FL=gb:NM_009773.1 gb:AF107296.1
1435409_at	2818	517	0.18	AV226721	Transcribed locus				gb:AV226721 /DB_XREF=gi:16385370 /DB_XREF=AV226721 /CLONE=4021402P08 /FEA=EST /CNT=18 /TID=Mm.2479.1 /TIER=Stack /STK=17 /UG=Mm.2479 /UG_TITLE=ESTs
1439936_at	1863	398	0.21	BE949265	Transcribed locus				gb:BE949265 /DB_XREF=gi:10527024 /DB_XREF=UI-M-BH3-avf-a-04-0-UI.s1 /CLONE=UI-M-BH3-avf-a-04-0-UI /FEA=EST /CNT=7 /TID=Mm.150542.1 /TIER=ConsEnd /STK=6 /UG=Mm.150542 /UG_TITLE=ESTs
1434266_at	1756	385	0.22	AI847670	Expressed sequence AI847670				gb:AI847670 /DB_XREF=gi:5491576 /DB_XREF=UI-M-AP1-agm-b-01-0-UI.s1 /CLONE=UI-M-AP1-agm-b-01-0-UI /FEA=EST /CNT=48 /TID=Mm.40655.1 /TIER=Stack /STK=37 /UG=Mm.40655 /LL=100748 /UG_GENE=AI847670 /UG_TITLE=expressed sequence AI847670
1453126_at	1480	361	0.24	Lrfn2	Leucine rich repeat and fibronectin type III domain containing 2				gb:AK017594.1 /DB_XREF=gi:12856913 /FEA=mRNA /CNT=34 /TID=Mm.133607.1 /TIER=Stack /STK=29 /UG=Mm.133607 /LL=70530 /UG_GENE=5730420O05Rik /UG_TITLE=RIKEN cDNA 5730420O05 gene /DEF=Mus musculus 8 days embryo whole body cDNA, RIKEN full-length enriched library, clone:5730420O05:homolog to KIAA1246 PROTEIN (FRAGMENT), full insert sequence.
1452406_x_at	1192	282	0.24	Erdr1	Erythroid differentiation regulator 1				gb:AJ007909.1 /DB_XREF=gi:3336885 /GEN=edr /FEA=mRNA /CNT=7 /TID=Mm.35829.2 /TIER=ConsEnd /STK=5 /UG=Mm.35829 /LL=170942 /DEF=Mus musculus mRNA for erythroid differentiation regulator, partial. /PROD=erythroid differentiation regulator
1437667_a_at	1010	262	0.26	Bach2	BTB and CNC homology 2				gb:AW553304 /DB_XREF=gi:7198727 /DB_XREF=L0225B12-3 /CLONE=L0225B12 /FEA=EST /CNT=17 /TID=Mm.21908.5 /TIER=Stack /STK=15 /UG=Mm.21908 /LL=12014 /UG_GENE=Bach2 /UG_TITLE=BTB and CNC homology 2
1423668_at	1114	313	0.28	Zdhhc14	Zinc finger, DHHC domain containing 14	1438619_x_at	1438975_x_at	1437614_x_at	gb:BC021423.1 /DB_XREF=gi:18204114 /FEA=FLmRNA /CNT=197 /TID=Mm.22338.1 /TIER=FL+Stack /STK=176 /UG=Mm.22338 /DEF=Mus musculus, Similar to hypothetical protein FLJ20984, clone MGC:29194 IMAGE:5011304, mRNA, complete cds. /PROD=Similar to hypothetical protein FLJ20984 /FL=gb:BC021423.1
1426059_at	2933	869	0.3	Gckr	Glucokinase regulatory protein				gb:BC012412.1 /DB_XREF=gi:15214573 /FEA=FLmRNA /CNT=1 /TID=Mm.100043.1 /TIER=FL /STK=1 /UG=Mm.100043 /DEF=Mus musculus, Similar to Glucokinase regulatory protein, clone MGC:19300 IMAGE:4159892, mRNA, complete cds. /PROD=Similar to Glucokinase regulatory protein /FL=gb:BC012412.1
1429691_at	1384	411	0.3	5430405N12Rik	RIKEN cDNA 5430405N12 gene				gb:AK017277.1 /DB_XREF=gi:12856436 /FEA=mRNA /CNT=21 /TID=Mm.103495.1 /TIER=Stack /STK=10 /UG=Mm.103495 /LL=71324 /UG_GENE=5430405N12Rik /UG_TITLE=RIKEN cDNA 5430405N12 gene /DEF=Mus musculus 6 days neonate head cDNA, RIKEN full-length enriched library, clone:5430405N12:hypothetical protein, full insert sequence.
1429146_at	4298	1424	0.33	Gas2	Growth arrest specific 2				gb:AV029890 /DB_XREF=gi:16356541 /DB_XREF=AV029890 /CLONE=1500010A16 /FEA=mRNA /CNT=76 /TID=Mm.41279.1 /TIER=Stack /STK=10 /UG=Mm.41279 /LL=75744 /UG_GENE=6620401M08Rik /UG_TITLE=RIKEN cDNA 6620401M08 gene
1460592_at	3257	1063	0.33	Epb4.1l1	Erythrocyte protein band 4.1-like 1				gb:BI684958 /DB_XREF=gi:15647586 /DB_XREF=603307614F1 /CLONE=IMAGE:5343866 /FEA=EST /CNT=18 /TID=Mm.20852.3 /TIER=Stack /STK=14 /UG=Mm.20852 /LL=13821 /UG_GENE=Epb4.1l1 /UG_TITLE=erythrocyte protein band 4.1-like 1
1425505_at	3055	1017	0.33	Mylk	Myosin, light polypeptide kinase	1425506_at			gb:AI746549 /DB_XREF=gi:5124813 /DB_XREF=ul08d10.x1 /CLONE=IMAGE:2076211 /FEA=FLmRNA /CNT=74 /TID=Mm.27680.1 /TIER=Stack /STK=28 /UG=Mm.27680 /UG_TITLE=Mus musculus telokin mRNA, complete cds /FL=gb:AF314149.1
1422832_at	1666	542	0.33	Rgr	Retinal G protein coupled receptor				gb:NM_021340.1 /DB_XREF=gi:10946655 /GEN=Rgr /FEA=FLmRNA /CNT=27 /TID=Mm.20460.1 /TIER=FL+Stack /STK=10 /UG=Mm.20460 /LL=57811 /DEF=Mus musculus retinal G protein coupled receptor (Rgr), mRNA. /PROD=retinal G protein coupled receptor /FL=gb:NM_021340.1 gb:AF076930.1
1456101_at	244	3	0.01	AV048064	PREDICTED: Mus musculus hypothetical protein LOC624677 (LOC624677), mRNA				gb:AV048064 /DB_XREF=gi:16380562 /DB_XREF=AV048064 /CLONE=1700072J23 /FEA=EST /CNT=17 /TID=Mm.28555.2 /TIER=Stack /STK=16 /UG=Mm.28555 /LL=104771 /UG_GENE=1200003C05Rik /UG_TITLE=RIKEN cDNA 1200003C05 gene
1419426_s_at	204	9	0.04	Oprs1	Opioid receptor, sigma 1				gb:NM_011335.1 /DB_XREF=gi:7549786 /GEN=Scya21a /FEA=FLmRNA /CNT=15 /TID=Mm.220853.1 /TIER=FL+Stack /STK=10 /UG=Mm.220853 /LL=20298 /DEF=Mus musculus small inducible cytokine A21a (serine) (Scya21a), mRNA. /PROD=small inducible cytokine A21a (serine) /FL=gb:NM_011335.1 gb:U88322.1
1439200_x_at	273	16	0.06	Erdr1	Erythroid differentiation regulator 1				gb:BE686792 /DB_XREF=gi:10074416 /DB_XREF=uu66g08.x1 /CLONE=IMAGE:3376958 /FEA=EST /CNT=10 /TID=Mm.35829.4 /TIER=Stack /STK=8 /UG=Mm.35829 /LL=170942 /UG_GENE=edr /UG_TITLE=erythroid differentiation regulator
1437781_at	173	14	0.08	BB180869	Transcribed locus				gb:BB180869 /DB_XREF=gi:16270031 /DB_XREF=BB180869 /CLONE=A230087K08 /FEA=EST /CNT=16 /TID=Mm.114886.1 /TIER=Stack /STK=14 /UG=Mm.114886 /UG_TITLE=ESTs
1454020_at	880	82	0.09	4930554H23Rik	RIKEN cDNA 4930554H23 gene				gb:AK019764.1 /DB_XREF=gi:12860096 /FEA=mRNA /CNT=1 /TID=Mm.159962.1 /TIER=ConsEnd /STK=0 /UG=Mm.159962 /LL=77631 /UG_GENE=4930554H23Rik /UG_TITLE=RIKEN cDNA 4930554H23 gene /DEF=Mus musculus adult male testis cDNA, RIKEN full-length enriched library, clone:4930554H23:unclassifiable, full insert sequence.
1447937_a_at	243	22	0.09	BB379724	Transcribed locus				gb:BB379724 /DB_XREF=gi:16407846 /DB_XREF=BB379724 /CLONE=C230001G04 /FEA=EST /CNT=32 /TID=Mm.41016.1 /TIER=ConsEnd /STK=1 /UG=Mm.41016 /LL=100365 /UG_GENE=AV071682 /UG_TITLE=expressed sequence AV071682
1441809_at	545	55	0.1	A930009A15Rik	RIKEN cDNA A930009A15 gene				gb:BB805891 /DB_XREF=gi:16978520 /DB_XREF=BB805891 /CLONE=G630071N19 /FEA=EST /CNT=4 /TID=Mm.146654.1 /TIER=ConsEnd /STK=4 /UG=Mm.146654 /UG_TITLE=ESTs
1452296_at	325	31	0.1	Slit3	Slit homolog 3 (Drosophila)				gb:BM570006 /DB_XREF=gi:18851978 /DB_XREF=ii07a04.x1 /CLONE=IMAGE:5940774 /FEA=mRNA /CNT=76 /TID=Mm.28509.1 /TIER=Stack /STK=18 /UG=Mm.28509 /LL=20564 /UG_GENE=Slit3 /UG_TITLE=slit homolog 3 (Drosophila)
1453398_at	844	96	0.11	A930009A15Rik	RIKEN cDNA A930009A15 gene				gb:AK020834.1 /DB_XREF=gi:12861538 /FEA=mRNA /CNT=6 /TID=Mm.132267.1 /TIER=ConsEnd /STK=4 /UG=Mm.132267 /LL=77798 /UG_GENE=A930009A15Rik /UG_TITLE=RIKEN cDNA A930009A15 gene /DEF=Mus musculus adult retina cDNA, RIKEN full-length enriched library, clone:A930009A15:unclassifiable, full insert sequence.
1417297_at	726	93	0.13	Itpr3	Inositol 1,4,5-triphosphate receptor 3				gb:NM_080553.1 /DB_XREF=gi:18017581 /GEN=Itpr3 /FEA=FLmRNA /CNT=124 /TID=Mm.26945.1 /TIER=FL+Stack /STK=49 /UG=Mm.26945 /LL=16440 /DEF=Mus musculus inositol 1,4,5-triphosphate receptor 3 (Itpr3), mRNA. /PROD=inositol 1,4,5-triphosphate receptor 3 /FL=gb:BC010323.1 gb:NM_080553.1
1425335_at	270	53	0.2	Cd8a	CD8 antigen, alpha chain	1444078_at			gb:AK017889.1 /DB_XREF=gi:12857370 /GEN=Cd8a /FEA=FLmRNA /CNT=51 /TID=Mm.1858.1 /TIER=Stack /STK=36 /UG=Mm.1858 /LL=12525 /UG_TITLE=CD8 antigen, alpha chain /DEF=Mus musculus adult male thymus cDNA, RIKEN full-length enriched library, clone:5830400P18:CD8 antigen, alpha chain, full insert sequence. /FL=gb:M12825.1 gb:U34881.1 gb:M12052.1 gb:M16981.1
Crx-downregulated genes
Affy_ID	Crx_ave	129_ave	129_ave/Crx_ave	Gene symbol	Gene name	Additional Affy_IDs					Additional gene information
1419723_at	12	5932	486.26	Opn1mw	Opsin 1 (cone pigments), medium-wave-sensitive (color blindness, deutan)					gb:NM_008106.1 /DB_XREF=gi:6679974 /GEN=Opn1mw /FEA=FLmRNA /CNT=11 /TID=Mm.89948.1 /TIER=FL /STK=7 /UG=Mm.89948 /LL=14539 /DEF=Mus musculus opsin 1 (cone pigments), medium-wave-sensitive (color blindness, deutan) (Opn1mw), mRNA. /PROD=green cone pigment /FL=gb:AF011389.1 gb:NM_008106.1 gb:BC014826.1 gb:AF190672.1
1431174_at	124	8684	69.78	A930036K24Rik	RIKEN cDNA A930036K24 gene					gb:BG297411 /DB_XREF=gi:13061036 /DB_XREF=602395554F1 /CLONE=IMAGE:4507164 /FEA=mRNA /CNT=11 /TID=Mm.134224.1 /TIER=ConsEnd /STK=0 /UG=Mm.134224 /LL=77829 /UG_GENE=A930036K24Rik /UG_TITLE=RIKEN cDNA A930036K24 gene
1452243_at	186	9160	49.28	Kcnj14	Potassium inwardly-rectifying channel, subfamily J, member 14					gb:BB282273 /DB_XREF=gi:15411146 /DB_XREF=BB282273 /CLONE=A930036I05 /FEA=mRNA /CNT=62 /TID=Mm.68170.1 /TIER=Stack /STK=37 /UG=Mm.68170 /UG_TITLE=Mus musculus, clone IMAGE:4482148, mRNA, partial cds
1430128_a_at	444	15100	34.04	Reep6	Receptor accessory protein 6					gb:AK002562.1 /DB_XREF=gi:12832633 /FEA=mRNA /CNT=17 /TID=Mm.28147.2 /TIER=ConsEnd /STK=3 /UG=Mm.28147 /LL=70335 /UG_GENE=0610011M24Rik /UG_TITLE=RIKEN cDNA 0610011M24 gene /DEF=Mus musculus adult male kidney cDNA, RIKEN full-length enriched library, clone:0610011M24:POLYPOSIS LOCUS PROTEIN 1-LIKE 1 (TB2 PROTEIN-LIKE 1), full insert sequence.
1460212_at	978	31543	32.26	Gnat1	Guanine nucleotide binding protein, alpha transducing 1					gb:BC022793.1 /DB_XREF=gi:18606311 /FEA=FLmRNA /CNT=322 /TID=Mm.69061.1 /TIER=FL+Stack /STK=39 /UG=Mm.69061 /LL=14685 /UG_GENE=Gnat1 /DEF=Mus musculus, guanine nucleotide binding protein, alpha transducing 1, clone MGC:27622 IMAGE:4505478, mRNA, complete cds. /PROD=guanine nucleotide binding protein, alphatransducing 1 /FL=gb:NM_008140.1 gb:BC022793.1
1421084_at	233	5878	25.2	Rs1h	Retinoschisis 1 homolog (human)	1421085_at				gb:AF073780.1 /DB_XREF=gi:5114034 /GEN=Xlrs1 /FEA=FLmRNA /CNT=41 /TID=Mm.41982.1 /TIER=FL /STK=2 /UG=Mm.41982 /LL=20147 /DEF=Mus musculus X-linked juvenile retinoschisis protein (Xlrs1) mRNA, complete cds. /PROD=X-linked juvenile retinoschisis protein /FL=gb:NM_011302.1 gb:AF073780.1 gb:AF084561.1
1425138_at	407	9485	23.29	Guca1b	Guanylate cyclase activator 1B					gb:BC018480.1 /DB_XREF=gi:17391130 /FEA=FLmRNA /CNT=56 /TID=Mm.59151.1 /TIER=FL /STK=5 /UG=Mm.59151 /DEF=Mus musculus, clone MGC:21424 IMAGE:4500919, mRNA, complete cds. /PROD=Unknown (protein for MGC:21424) /FL=gb:BC018480.1 gb:BC018258.1
1450765_a_at	235	5327	22.71	Pde6h	Phosphodiesterase 6H, cGMP-specific, cone, gamma	1450766_at				gb:NM_023898.1 /DB_XREF=gi:12963860 /GEN=Pde6h /FEA=FLmRNA /CNT=14 /TID=Mm.138001.1 /TIER=FL+Stack /STK=11 /UG=Mm.138001 /LL=78600 /DEF=Mus musculus phosphodiesterase 6H, cGMP-specific, cone, gamma (Pde6h), mRNA. /PROD=phosphodiesterase 6H, cGMP-specific, cone,gamma /FL=gb:AF190929.1 gb:NM_023898.1
1420484_a_at	603	13575	22.5	Vtn	Vitronectin	1455098_a_at				gb:NM_011707.1 /DB_XREF=gi:6755986 /GEN=Vtn /FEA=FLmRNA /CNT=90 /TID=Mm.3667.1 /TIER=FL /STK=4 /UG=Mm.3667 /LL=22370 /DEF=Mus musculus vitronectin (Vtn), mRNA. /PROD=vitronectin /FL=gb:AF440693.1 gb:M77123.1 gb:BC012690.1 gb:NM_011707.1
1451647_at	876	15495	17.69	Slc24a1	Solute carrier family 24 (sodium/potassium/calcium exchanger), member 1					gb:BC016094.1 /DB_XREF=gi:16359261 /FEA=FLmRNA /CNT=28 /TID=Mm.156243.1 /TIER=FL /STK=3 /UG=Mm.156243 /DEF=Mus musculus, Similar to sodiumcalciumpotassium exchanger, clone MGC:27617 IMAGE:4504496, mRNA, complete cds. /PROD=Similar to sodiumcalciumpotassium exchanger /FL=gb:BC016094.1
1450215_at	1265	22206	17.56	Rcvrn	Recoverin					gb:NM_009038.1 /DB_XREF=gi:6677692 /GEN=Rcvrn /FEA=FLmRNA /CNT=9 /TID=Mm.157931.1 /TIER=FL /STK=2 /UG=Mm.157931 /LL=19674 /DEF=Mus musculus recoverin (Rcvrn), mRNA. /PROD=recoverin /FL=gb:NM_009038.1
1451603_at	890	11324	12.73	Rtbdn	Retbindin					gb:BC022744.1 /DB_XREF=gi:18490555 /FEA=FLmRNA /CNT=23 /TID=Mm.206228.1 /TIER=FL /STK=5 /UG=Mm.206228 /DEF=Mus musculus, clone MGC:31644 IMAGE:4527012, mRNA, complete cds. /PROD=Unknown (protein for MGC:31644) /FL=gb:BC027079.1 gb:BC022744.1 gb:BC023051.1
1424256_at	955	11861	12.42	Rdh12	Retinol dehydrogenase 12	1431010_a_at				gb:BC016204.1 /DB_XREF=gi:16740648 /FEA=FLmRNA /CNT=56 /TID=Mm.121647.1 /TIER=FL+Stack /STK=42 /UG=Mm.121647 /LL=77974 /UG_GENE=A930033N07Rik /DEF=Mus musculus, Similar to RIKEN cDNA A930033N07 gene, clone MGC:27665 IMAGE:4527851, mRNA, complete cds. /PROD=Similar to RIKEN cDNA A930033N07 gene /FL=gb:BC016204.1
1451549_at	557	5364	9.63	BC016201	CDNA sequence BC016201					gb:BC016201.1 /DB_XREF=gi:16740639 /FEA=FLmRNA /CNT=20 /TID=Mm.206230.1 /TIER=FL+Stack /STK=10 /UG=Mm.206230 /DEF=Mus musculus, Similar to cyclic nucleotide-gated channel beta subunit 1, clone MGC:27656 IMAGE:4527347, mRNA, complete cds. /PROD=Similar to cyclic nucleotide-gated channel betasubunit 1 /FL=gb:BC016201.1
1433699_at	805	7205	8.95	Tnfaip3	Tumor necrosis factor, alpha-induced protein 3	1450829_at				gb:BM241351 /DB_XREF=gi:17876621 /DB_XREF=K0615G01-3 /CLONE=K0615G01 /FEA=EST /CNT=80 /TID=Mm.116683.1 /TIER=Stack /STK=70 /UG=Mm.116683 /UG_TITLE=ESTs
1441330_at	965	7700	7.98	Crb1	Crumbs homolog 1 (Drosophila)					gb:BG295465 /DB_XREF=gi:13057127 /DB_XREF=602392781F1 /CLONE=IMAGE:4504244 /FEA=EST /CNT=6 /TID=Mm.101073.1 /TIER=ConsEnd /STK=4 /UG=Mm.101073 /UG_TITLE=ESTs
1425171_at	4959	31979	6.45	Rho	Rhodopsin	1451617_at	1451618_at	1425172_at		gb:BG296967 /DB_XREF=gi:13060148 /DB_XREF=602394811F1 /CLONE=IMAGE:4506602 /FEA=FLmRNA /CNT=341 /TID=Mm.2965.1 /TIER=Stack /STK=18 /UG=Mm.2965 /UG_TITLE=Mus musculus, Similar to rhodopsin (opsin 2, rod pigment) (retinitis pigmentosa 4, autosomal dominant), clone MGC:21585 IMAGE:4500760, mRNA, complete cds /FL=gb:BC013125.1
1436657_at	1479	8813	5.96	Prcd	PREDICTED: Mus musculus hypothetical protein LOC629972 (LOC629972), mRNA					gb:AW060253 /DB_XREF=gi:6008044 /DB_XREF=UI-M-BH1-amv-f-03-0-UI.s1 /CLONE=UI-M-BH1-amv-f-03-0-UI /FEA=EST /CNT=9 /TID=Mm.39855.1 /TIER=Stack /STK=8 /UG=Mm.39855 /UG_TITLE=ESTs
1417430_at	1038	5837	5.63	Cdr2	Cerebellar degeneration-related 2					gb:NM_007672.1 /DB_XREF=gi:6671729 /GEN=Cdr2 /FEA=FLmRNA /CNT=104 /TID=Mm.1640.1 /TIER=FL+Stack /STK=45 /UG=Mm.1640 /LL=12585 /DEF=Mus musculus cerebellar degeneration-related 2 (Cdr2), mRNA. /PROD=cerebellar degeneration-related 2 /FL=gb:NM_007672.1 gb:U88588.1
1429133_at	1188	6660	5.61	4930519N16Rik	RIKEN cDNA 4930519N16 gene					gb:AK015847.1 /DB_XREF=gi:12854341 /FEA=mRNA /CNT=16 /TID=Mm.179243.1 /TIER=Stack /STK=11 /UG=Mm.179243 /LL=75124 /UG_GENE=4930519N16Rik /UG_TITLE=RIKEN cDNA 4930519N16 gene /DEF=Mus musculus adult male testis cDNA, RIKEN full-length enriched library, clone:4930519N16:related to THIOREDOXIN, full insert sequence.
1418029_at	973	5220	5.37	Faim	Fas apoptotic inhibitory molecule					gb:NM_011810.1 /DB_XREF=gi:6753815 /GEN=Faim /FEA=FLmRNA /CNT=60 /TID=Mm.74605.1 /TIER=FL+Stack /STK=31 /UG=Mm.74605 /LL=23873 /DEF=Mus musculus Fas apoptotic inhibitory molecule (Faim), mRNA. /PROD=Fas apoptotic inhibitory molecule /FL=gb:AF130367.1 gb:NM_011810.1
1417953_at	1555	8329	5.36	D6Wsu176e	DNA segment, Chr 6, Wayne State University 176, expressed	1448904_at				gb:NM_138587.1 /DB_XREF=gi:20070393 /GEN=D6Wsu176e /FEA=FLmRNA /CNT=112 /TID=Mm.27673.1 /TIER=FL+Stack /STK=32 /UG=Mm.27673 /LL=27999 /DEF=Mus musculus DNA segment, Chr 6, Wayne State University 176, expressed (D6Wsu176e), mRNA. /PROD=DNA segment, Chr 6, Wayne State University 176,expressed /FL=gb:BC009086.1 gb:NM_138587.1
1425100_a_at	5597	28141	5.03	Pde6g	Phosphodiesterase 6G, cGMP-specific, rod, gamma	1450453_a_at				gb:BC014723.1 /DB_XREF=gi:15928490 /FEA=FLmRNA /CNT=10 /TID=Mm.39200.2 /TIER=FL /STK=7 /UG=Mm.39200 /LL=18588 /UG_GENE=Pde6g /DEF=Mus musculus, Similar to phosphodiesterase 6G, cGMP-specific, rod, gamma, clone MGC:25416 IMAGE:4511855, mRNA, complete cds. /PROD=Similar to phosphodiesterase 6G, cGMP-specific,rod, gamma /FL=gb:BC014723.1
1415860_at	2287	10834	4.74	Kpna2	Karyopherin (importin) alpha 2					gb:NM_010655.1 /DB_XREF=gi:6754473 /GEN=Kpna2 /FEA=FLmRNA /CNT=399 /TID=Mm.12508.1 /TIER=FL+Stack /STK=197 /UG=Mm.12508 /LL=16647 /DEF=Mus musculus karyopherin (importin) alpha 2 (Kpna2), mRNA. /PROD=karyopherin (importin) alpha 2 /FL=gb:U34229.1 gb:NM_010655.1 gb:BC006720.1 gb:D55720.1 gb:U12270.1 gb:BC003274.1
1423179_at	1538	7281	4.74	Kcnb1	Potassium voltage gated channel, Shab-related subfamily, member 1	1423180_at				gb:BB324482 /DB_XREF=gi:16403514 /DB_XREF=BB324482 /CLONE=B430109A15 /FEA=FLmRNA /CNT=160 /TID=Mm.54162.1 /TIER=Stack /STK=33 /UG=Mm.54162 /LL=16500 /UG_GENE=Kcnb1 /UG_TITLE=potassium voltage gated channel, Shab-related subfamily, member 1 /FL=gb:NM_008420.1 gb:M64228.1
1417432_a_at	6432	30106	4.68	Gnb1	Guanine nucleotide binding protein, beta 1	1454696_at				gb:NM_008142.1 /DB_XREF=gi:6680044 /GEN=Gnb1 /FEA=FLmRNA /CNT=64 /TID=Mm.2344.1 /TIER=FL+Stack /STK=45 /UG=Mm.2344 /LL=14688 /DEF=Mus musculus guanine nucleotide binding protein, beta 1 (Gnb1), mRNA. /PROD=guanine nucleotide-binding protein, beta-1subunit /FL=gb:U29055.1 gb:NM_008142.1
1419067_a_at	1213	5458	4.5	Rabgef1	RAB guanine nucleotide exchange factor (GEF) 1	1419068_at	1419069_at			gb:NM_019983.1 /DB_XREF=gi:9910315 /GEN=Rab5ef-pending /FEA=FLmRNA /CNT=53 /TID=Mm.101118.1 /TIER=FL+Stack /STK=14 /UG=Mm.101118 /LL=56715 /DEF=Mus musculus Rab5 exchange factor (Rab5ef-pending), mRNA. /PROD=Rab5 exchange factor /FL=gb:AF093590.1 gb:BC018229.1 gb:NM_019983.1
1440256_at	2139	8748	4.09	Rgs9bp	Regulator of G-protein signalling 9 binding protein					gb:BE981862 /DB_XREF=gi:10651419 /DB_XREF=UI-M-CG0p-bde-b-04-0-UI.s1 /CLONE=UI-M-CG0p-bde-b-04-0-UI /FEA=EST /CNT=13 /TID=Mm.151251.1 /TIER=ConsEnd /STK=5 /UG=Mm.151251 /UG_TITLE=ESTs, Weakly similar to C37C3.1.p (Caenorhabditis elegans) (C.elegans)
1437287_at	1347	5332	3.96	1110020G09Rik	RIKEN cDNA 1110020G09 gene	1453422_a_at				gb:BB277742 /DB_XREF=gi:15410953 /DB_XREF=BB277742 /CLONE=A930007D01 /FEA=EST /CNT=136 /TID=Mm.42110.2 /TIER=Stack /STK=10 /UG=Mm.42110 /LL=68646 /UG_GENE=1110020G09Rik /UG_TITLE=RIKEN cDNA 1110020G09 gene
1440838_at	1610	6366	3.95	AI852064	Expressed sequence AI852064					gb:BQ126997 /DB_XREF=gi:20200908 /DB_XREF=ii57h06.x1 /CLONE=IMAGE:5946082 /FEA=EST /CNT=17 /TID=Mm.40297.1 /TIER=ConsEnd /STK=4 /UG=Mm.40297 /LL=99104 /UG_GENE=AI852064 /UG_TITLE=expressed sequence AI852064
1424646_at	1569	5425	3.46	Uckl1	Uridine-cytidine kinase 1-like 1					gb:BC016535.1 /DB_XREF=gi:16741432 /FEA=FLmRNA /CNT=37 /TID=Mm.29001.1 /TIER=FL+Stack /STK=21 /UG=Mm.29001 /LL=68556 /UG_GENE=1110007H10Rik /DEF=Mus musculus, Similar to hypothetical protein FLJ20517, clone MGC:27764 IMAGE:2655873, mRNA, complete cds. /PROD=Similar to hypothetical protein FLJ20517 /FL=gb:BC016535.1
1425288_at	1930	6475	3.36	BC026991	Transcribed locus					gb:BC026991.1 /DB_XREF=gi:20073348 /FEA=FLmRNA /CNT=17 /TID=Mm.69049.2 /TIER=FL /STK=3 /UG=Mm.69049 /LL=57741 /UG_GENE=AF155546 /DEF=Mus musculus, similar to unnamed protein product, clone MGC:38976 IMAGE:5363470, mRNA, complete cds. /PROD=similar to unnamed protein product /FL=gb:BC026991.1
1451763_at	3708	12352	3.33	Cnga1	Cyclic nucleotide gated channel alpha 1					gb:U19717.1 /DB_XREF=gi:885885 /FEA=FLmRNA /CNT=17 /TID=Mm.23793.1 /TIER=FL /STK=1 /UG=Mm.23793 /LL=12788 /UG_GENE=Cncg /DEF=Mus musculus cGMP-gated cation channel mRNA, clone mIMCD-K2 no.1, complete cds. /PROD=cGMP-gated cation channel /FL=gb:M84742.1 gb:U19717.1
1425167_a_at	3811	12013	3.15	Gngt1	Guanine nucleotide binding protein (G protein), gamma transducing activity polypeptide 1	1451633_a_at				gb:BC023064.1 /DB_XREF=gi:18606499 /FEA=FLmRNA /CNT=7 /TID=Mm.95398.1 /TIER=FL /STK=5 /UG=Mm.95398 /LL=14699 /UG_GENE=Gng1 /DEF=Mus musculus, Similar to guanine nucleotide binding protein (G protein), gamma 1 subunit, clone MGC:38870 IMAGE:5361463, mRNA, complete cds. /PROD=Similar to guanine nucleotide binding protein (Gprotein), gamma 1 subunit /FL=gb:BC023064.1
1426716_at	3094	9100	2.94	Tdrd7	Tudor domain containing 7					gb:BC025099.1 /DB_XREF=gi:19263616 /FEA=mRNA /CNT=112 /TID=Mm.30935.1 /TIER=Stack /STK=95 /UG=Mm.30935 /DEF=Mus musculus, clone IMAGE:4512174, mRNA, partial cds. /PROD=Unknown (protein for IMAGE:4512174)
1450946_at	10946	30476	2.78	Nrl	Neural retina leucine zipper gene					gb:BG298773 /DB_XREF=gi:13063762 /DB_XREF=602396508F1 /CLONE=IMAGE:4511449 /FEA=FLmRNA /CNT=58 /TID=Mm.20422.1 /TIER=Stack /STK=13 /UG=Mm.20422 /LL=18185 /UG_GENE=Nrl /UG_TITLE=neural retina leucine zipper gene /FL=gb:NM_008736.1 gb:L14935.1
1451580_a_at	2098	5770	2.75	Ttr	Transthyretin	1459737_s_at	1455913_x_at	1454608_x_at		gb:BC024702.1 /DB_XREF=gi:19354092 /FEA=FLmRNA /CNT=77 /TID=Mm.2108.2 /TIER=FL /STK=7 /UG=Mm.2108 /LL=22139 /UG_GENE=Ttr /DEF=Mus musculus, transthyretin, clone MGC:18651 IMAGE:4192268, mRNA, complete cds. /PROD=transthyretin /FL=gb:BC024702.1
1439802_at	2667	7181	2.69	Stk35	Serine/threonine kinase 35					gb:AV375248 /DB_XREF=gi:16397982 /DB_XREF=AV375248 /CLONE=9130022M19 /FEA=EST /CNT=19 /TID=Mm.44868.1 /TIER=ConsEnd /STK=6 /UG=Mm.44868 /UG_TITLE=ESTs
1426500_at	2536	6791	2.68	Icmt	Isoprenylcysteine carboxyl methyltransferase					gb:BF462080 /DB_XREF=gi:11531263 /DB_XREF=UI-M-CG0p-bmx-c-12-0-UI.s1 /CLONE=UI-M-CG0p-bmx-c-12-0-UI /FEA=FLmRNA /CNT=162 /TID=Mm.29356.1 /TIER=Stack /STK=8 /UG=Mm.29356 /LL=97166 /UG_GENE=C80758 /UG_TITLE=expressed sequence C80758 /FL=gb:BC006724.1
1449628_s_at	3009	8047	2.67	Stard7	START domain containing 7					gb:AI852671 /DB_XREF=gi:5496577 /DB_XREF=UI-M-BH0-aji-b-08-0-UI.s1 /CLONE=UI-M-BH0-aji-b-08-0-UI /FEA=EST /CNT=1 /TID=Mm.219882.1 /TIER=ConsEnd /STK=1 /UG=Mm.219882 /LL=99107 /UG_GENE=AI852671 /UG_TITLE=expressed sequence AI852671
1424963_at	4556	11985	2.63	Rp1h	Retinitis pigmentosa 1 homolog (human)					gb:AF155141.2 /DB_XREF=gi:18152811 /GEN=Rp1 /FEA=FLmRNA /CNT=36 /TID=Mm.78749.1 /TIER=FL+Stack /STK=10 /UG=Mm.78749 /LL=19888 /DEF=Mus musculus oxygen-regulated photoreceptor protein 1 (Rp1) mRNA, complete cds. /PROD=oxygen-regulated photoreceptor protein 1 /FL=gb:AF155141.2
1434313_at	3642	9493	2.61	6330407D12Rik	RIKEN cDNA 6330407D12 gene					gb:BB762434 /DB_XREF=gi:16207584 /DB_XREF=BB762434 /CLONE=G370010L10 /FEA=EST /CNT=45 /TID=Mm.32416.1 /TIER=Stack /STK=35 /UG=Mm.32416 /LL=58912 /UG_GENE=AI465320 /UG_TITLE=EST AI465320
1428986_at	2594	6765	2.61	Slc17a7	Solute carrier family 17 (sodium-dependent inorganic phosphate cotransporter), member 7					gb:BQ175176 /DB_XREF=gi:20350668 /DB_XREF=UI-M-DJ2-bwd-d-10-0-UI.s1 /CLONE=UI-M-DJ2-bwd-d-10-0-UI /FEA=mRNA /CNT=23 /TID=Mm.41613.1 /TIER=Stack /STK=15 /UG=Mm.41613 /LL=72961 /UG_GENE=2900052E22Rik /UG_TITLE=RIKEN cDNA 2900052E22 gene
1422612_at	2853	7314	2.56	Hk2	Hexokinase 2					gb:NM_013820.1 /DB_XREF=gi:7305142 /GEN=Hk2 /FEA=FLmRNA /CNT=60 /TID=Mm.2549.1 /TIER=FL+Stack /STK=27 /UG=Mm.2549 /LL=15277 /DEF=Mus musculus hexokinase 2 (Hk2), mRNA. /PROD=hexokinase 2 /FL=gb:NM_013820.1
1423859_a_at	2936	7382	2.51	Ptgds	Prostaglandin D2 synthase (brain)					gb:AB006361.1 /DB_XREF=gi:2317285 /FEA=FLmRNA /CNT=130 /TID=Mm.1008.1 /TIER=FL+Stack /STK=89 /UG=Mm.1008 /LL=19215 /UG_GENE=Ptgds /DEF=Mus musculus mRNA for prostaglandin D synthetase, complete cds. /PROD=prostaglandin D synthetase /FL=gb:AB006361.1
1433819_s_at	2887	7234	2.51	Agpat3	1-acylglycerol-3-phosphate O-acyltransferase 3					gb:AV296997 /DB_XREF=gi:15405860 /DB_XREF=AV296997 /CLONE=5730446A02 /FEA=EST /CNT=117 /TID=Mm.86311.1 /TIER=Stack /STK=18 /UG=Mm.86311 /LL=103456 /UG_GENE=AW493985 /UG_TITLE=expressed sequence AW493985
1416101_a_at	4258	10349	2.43	Hist1h1c	Histone 1, H1c	1436994_a_at				gb:NM_015786.1 /DB_XREF=gi:9845256 /GEN=H1f2 /FEA=FLmRNA /CNT=188 /TID=Mm.193539.1 /TIER=FL+Stack /STK=127 /UG=Mm.193539 /LL=50708 /DEF=Mus musculus H1 histone family, member 2 (H1f2), mRNA. /PROD=H1 histone family, member 2 /FL=gb:NM_015786.1
1417886_at	5038	11847	2.35	1810009A15Rik	RIKEN cDNA 1810009A15 gene					gb:NM_025463.1 /DB_XREF=gi:13384875 /GEN=1810009A15Rik /FEA=FLmRNA /CNT=58 /TID=Mm.28103.1 /TIER=FL+Stack /STK=34 /UG=Mm.28103 /LL=66276 /DEF=Mus musculus RIKEN cDNA 1810009A15 gene (1810009A15Rik), mRNA. /PROD=RIKEN cDNA 1810009A15 /FL=gb:NM_025463.1
1460368_at	6073	14219	2.34	Mpp4	Membrane protein, palmitoylated 4 (MAGUK p55 subfamily member 4)					gb:AB059357.1 /DB_XREF=gi:15991073 /GEN=mDLG6A /FEA=FLmRNA /CNT=25 /TID=Mm.101838.1 /TIER=FL+Stack /STK=10 /UG=Mm.101838 /DEF=Mus musculus mRNA for mDLG6A, complete cds. /PROD=mDLG6A /FL=gb:AB059358.1 gb:AB059357.1
1437533_at	4831	10853	2.25	BB794157	15 days embryo embryonic body below diaphragm cDNA, RIKEN full-length enriched library, clone:8230401G11 product:unclassifiable, full insert sequence					gb:BB794157 /DB_XREF=gi:16963776 /DB_XREF=BB794157 /CLONE=G430149C06 /FEA=EST /CNT=157 /TID=Mm.149115.6 /TIER=Stack /STK=11 /UG=Mm.149115 /LL=11798 /UG_GENE=Birc4 /UG_TITLE=baculoviral IAP repeat-containing 4
1422830_s_at	3571	7942	2.22	Drd4	Dopamine receptor 4					gb:NM_007878.1 /DB_XREF=gi:6681222 /GEN=Drd4 /FEA=FLmRNA /CNT=26 /TID=Mm.41075.1 /TIER=FL+Stack /STK=10 /UG=Mm.41075 /LL=13491 /DEF=Mus musculus dopamine receptor 4 (Drd4), mRNA. /PROD=dopamine receptor 4 /FL=gb:NM_007878.1 gb:BC016086.1
1457983_s_at	3688	8075	2.19	Rwdd4a	RWD domain containing 4A					gb:AV310898 /DB_XREF=gi:6363933 /DB_XREF=AV310898 /CLONE=5730593A16 /FEA=EST /CNT=4 /TID=Mm.90364.1 /TIER=ConsEnd /STK=3 /UG=Mm.90364 /UG_TITLE=ESTs
1438641_x_at	7304	15926	2.18	Aldoa	Aldolase 1, A isoform	1454209_at	1452807_s_at	1452806_at		gb:BB391156 /DB_XREF=gi:9114104 /DB_XREF=BB391156 /CLONE=C230073G08 /FEA=EST /CNT=10 /TID=Mm.62181.1 /TIER=Stack /STK=10 /UG=Mm.62181 /UG_TITLE=ESTs
1447905_x_at	3786	8216	2.17	Nup62	Nucleoporin 62					gb:BB331755 /DB_XREF=gi:9040518 /DB_XREF=BB331755 /CLONE=B730038J24 /FEA=EST /CNT=2 /TID=Mm.149632.1 /TIER=ConsEnd /STK=2 /UG=Mm.149632 /UG_TITLE=ESTs
1421346_a_at	4711	9641	2.05	Slc6a6	Solute carrier family 6 (neurotransmitter transporter, taurine), member 6	1437149_at				gb:NM_009320.1 /DB_XREF=gi:6678222 /GEN=Slc6a6 /FEA=FLmRNA /CNT=11 /TID=Mm.200518.1 /TIER=FL /STK=2 /UG=Mm.200518 /LL=21366 /DEF=Mus musculus solute carrier family 6 (neurotransmitter transporter, taurine), member 6 (Slc6a6), mRNA. /PROD=taurinebeta-alanine transporter /FL=gb:AF020194.2 gb:NM_009320.1
1420745_a_at	3572	7248	2.03	Ccndbp1	Cyclin D-type binding-protein 1					gb:NM_010761.1 /DB_XREF=gi:6754617 /GEN=Maid /FEA=FLmRNA /CNT=6 /TID=Mm.7838.1 /TIER=FL /STK=3 /UG=Mm.7838 /LL=17151 /DEF=Mus musculus maternal inhibition of differentiation (Maid), mRNA. /PROD=maternal inhibition of differentiation /FL=gb:NM_010761.1 gb:U50734.1
1428547_at	2564	5212	2.03	Nt5e	5' nucleotidase, ecto					gb:AV273591 /DB_XREF=gi:15405538 /DB_XREF=AV273591 /CLONE=4932412C08 /FEA=mRNA /CNT=48 /TID=Mm.31676.1 /TIER=Stack /STK=33 /UG=Mm.31676 /LL=74242 /UG_GENE=2210401F01Rik /UG_TITLE=RIKEN cDNA 2210401F01 gene
1417810_a_at	3635	7305	2.01	Pacsin2	Protein kinase C and casein kinase substrate in neurons 2					gb:NM_011862.1 /DB_XREF=gi:7106380 /GEN=Pacsin2 /FEA=FLmRNA /CNT=67 /TID=Mm.23978.1 /TIER=FL+Stack /STK=36 /UG=Mm.23978 /LL=23970 /DEF=Mus musculus protein kinase C and casein kinase substrate in neurons 2 (Pacsin2), mRNA. /PROD=protein kinase C and casein kinase substrate inneurons 2 /FL=gb:AF128535.1 gb:NM_011862.1
1435800_a_at	6899	13721	2	Csda	Cold shock domain protein A	1451012_a_at				gb:BB779100 /DB_XREF=gi:16939800 /DB_XREF=BB779100 /CLONE=G430050O16 /FEA=EST /CNT=17 /TID=Mm.193526.3 /TIER=Stack /STK=13 /UG=Mm.193526 /LL=56449 /UG_GENE=Csda /UG_TITLE=cold shock domain protein A
1416148_at	6622	13040	2	Laptm4b	Lysosomal-associated protein transmembrane 4B					gb:BC019120.1 /DB_XREF=gi:17512295 /FEA=FLmRNA /CNT=221 /TID=Mm.197518.1 /TIER=FL+Stack /STK=121 /UG=Mm.197518 /LL=114128 /UG_GENE=Laptm4b /DEF=Mus musculus, lysosomal-associated protein transmembrane 4B, clone MGC:29407 IMAGE:4507607, mRNA, complete cds. /PROD=lysosomal-associated protein transmembrane 4B /FL=gb:BC019120.1 gb:NM_033521.1 gb:AF317418.1
1448996_at	8994	17650	2	Rom1	Rod outer segment membrane protein 1					gb:NM_009073.1 /DB_XREF=gi:6677762 /GEN=Rom1 /FEA=FLmRNA /CNT=78 /TID=Mm.679.1 /TIER=FL+Stack /STK=28 /UG=Mm.679 /LL=19881 /DEF=Mus musculus rod outer segment membrane protein 1 (Rom1), mRNA. /PROD=rod outer segment membrane protein 1 /FL=gb:BC014827.1 gb:NM_009073.1
1458418_at	19	3179	166.74	BB282649	Transcribed locus					gb:BB282649 /DB_XREF=gi:16401375 /DB_XREF=BB282649 /CLONE=A930039E13 /FEA=EST /CNT=6 /TID=Mm.208796.1 /TIER=ConsEnd /STK=2 /UG=Mm.208796 /UG_TITLE=ESTs
1429791_at	28	1445	51.56	Cks1b	CDC28 protein kinase 1b	1440683_at				gb:AK020807.1 /DB_XREF=gi:12861506 /FEA=mRNA /CNT=14 /TID=Mm.95741.1 /TIER=Stack /STK=8 /UG=Mm.95741 /LL=77940 /UG_GENE=A930004D18Rik /UG_TITLE=RIKEN cDNA A930004D18 gene /DEF=Mus musculus adult retina cDNA, RIKEN full-length enriched library, clone:A930004D18:unclassifiable transcript, full insert sequence.
1428975_at	49	2236	45.24	Susd3	Sushi domain containing 3					gb:AK003860.1 /DB_XREF=gi:12834784 /FEA=mRNA /CNT=36 /TID=Mm.34308.1 /TIER=Stack /STK=15 /UG=Mm.34308 /LL=66329 /UG_GENE=1700017I11Rik /UG_TITLE=RIKEN cDNA 1700017I11 gene /DEF=Mus musculus 18 days embryo whole body cDNA, RIKEN full-length enriched library, clone:1110020G21:Sushi domain (SCR repeat) containing protein, full insert sequence.
1436277_at	73	3214	44.02	D330010C22Rik	RIKEN cDNA 330010C22 gene	1444404_at				gb:BI734893 /DB_XREF=gi:15711906 /DB_XREF=603356092F1 /CLONE=IMAGE:5363375 /FEA=EST /CNT=10 /TID=Mm.29356.2 /TIER=Stack /STK=10 /UG=Mm.29356 /LL=97166 /UG_GENE=C80758 /UG_TITLE=expressed sequence C80758
1416203_at	66	2808	42.68	Aqp1	Aquaporin 1					gb:NM_007472.1 /DB_XREF=gi:6680709 /GEN=Aqp1 /FEA=FLmRNA /CNT=262 /TID=Mm.18625.1 /TIER=FL+Stack /STK=113 /UG=Mm.18625 /LL=11826 /DEF=Mus musculus aquaporin 1 (Aqp1), mRNA. /PROD=aquaporin 1 /FL=gb:NM_007472.1 gb:BC007125.1 gb:L02914.1
1448593_at	50	1248	24.99	Wisp1	WNT1 inducible signaling pathway protein 1	1448594_at				gb:AF100777.1 /DB_XREF=gi:4028576 /GEN=Wisp1 /FEA=FLmRNA /CNT=99 /TID=Mm.10222.1 /TIER=FL+Stack /STK=56 /UG=Mm.10222 /LL=22402 /DEF=Mus musculus connective tissue growth factor related protein WISP-1 (Wisp1) mRNA, complete cds. /PROD=connective tissue growth factor related proteinWISP-1 /FL=gb:AF100777.1 gb:NM_018865.1 gb:AB004873.1
1458506_at	177	3926	22.24	Gm1582	Gene model 1582, (NCBI)					gb:BI735399 /DB_XREF=gi:15712412 /DB_XREF=603356886F1 /CLONE=IMAGE:5364237 /FEA=EST /CNT=6 /TID=Mm.206197.1 /TIER=ConsEnd /STK=2 /UG=Mm.206197 /UG_TITLE=ESTs
1425696_at	51	1125	22.02	Txnl6	Thioredoxin-like 6					gb:BC021911.1 /DB_XREF=gi:18314459 /FEA=FLmRNA /CNT=11 /TID=Mm.213208.1 /TIER=FL /STK=1 /UG=Mm.213208 /DEF=Mus musculus, clone MGC:27601 IMAGE:4502967, mRNA, complete cds. /PROD=Unknown (protein for MGC:27601) /FL=gb:BC021911.1
1425408_a_at	179	3754	20.95	2610034M16Rik	RIKEN cDNA 2610034M16 gene					gb:BC024774.1 /DB_XREF=gi:19353722 /FEA=FLmRNA /CNT=4 /TID=Mm.179408.1 /TIER=FL /STK=2 /UG=Mm.179408 /LL=69239 /UG_GENE=2610034M16Rik /DEF=Mus musculus, Similar to RIKEN cDNA 2610034M16 gene, clone MGC:38949 IMAGE:5363112, mRNA, complete cds. /PROD=Similar to RIKEN cDNA 2610034M16 gene /FL=gb:BC024774.1
1444095_a_at	147	2924	19.85	Setd3	SET domain containing 3					gb:BE986579 /DB_XREF=gi:10661053 /DB_XREF=UI-M-CG0p-bew-b-11-0-UI.s1 /CLONE=UI-M-CG0p-bew-b-11-0-UI /FEA=EST /CNT=6 /TID=Mm.40852.1 /TIER=ConsEnd /STK=2 /UG=Mm.40852 /UG_TITLE=ESTs
1451636_at	279	4019	14.4	Ankrd33	Ankyrin repeat domain 33					gb:BC022726.1 /DB_XREF=gi:18490519 /FEA=FLmRNA /CNT=11 /TID=Mm.152952.1 /TIER=FL /STK=4 /UG=Mm.152952 /DEF=Mus musculus, clone MGC:31569 IMAGE:4504539, mRNA, complete cds. /PROD=Unknown (protein for MGC:31569) /FL=gb:BC022726.1
1456905_at	162	2227	13.77	Slc6a9	Solute carrier family 6 (neurotransmitter transporter, glycine), member 9					gb:BB018903 /DB_XREF=gi:16257595 /DB_XREF=BB018903 /CLONE=4930580H03 /FEA=EST /CNT=12 /TID=Mm.23104.1 /TIER=ConsEnd /STK=6 /UG=Mm.23104 /UG_TITLE=ESTs
1424650_at	155	2048	13.2	Pdia5	Protein disulfide isomerase associated 5					gb:BC009151.1 /DB_XREF=gi:14318712 /FEA=FLmRNA /CNT=57 /TID=Mm.71015.1 /TIER=FL+Stack /STK=21 /UG=Mm.71015 /LL=72599 /UG_GENE=2700053F16Rik /DEF=Mus musculus, Similar to for protein disulfide isomerase-related, clone MGC:11961 IMAGE:3600849, mRNA, complete cds. /PROD=Similar to for protein disulfideisomerase-related /FL=gb:BC009151.1
1427126_at	107	1199	11.16	Hspa1b	Heat shock protein 1B	1452318_a_at	1427127_x_at			gb:M12573.1 /DB_XREF=gi:194018 /FEA=mRNA /CNT=23 /TID=Mm.6388.1 /TIER=Stack /STK=15 /UG=Mm.6388 /LL=15511 /UG_GENE=Hsp70-1 /UG_TITLE=heat shock protein, 70 kDa 1 /DEF=Mouse heat shock protein (hsp68) mRNA, clone MHS214, partial cds.
1421027_a_at	106	1138	10.7	Mef2c	Myocyte enhancer factor 2C	1421028_a_at	1439946_at	1451507_at	1424852_at	gb:NM_025282.1 /DB_XREF=gi:13384623 /GEN=Mef2c /FEA=FLmRNA /CNT=41 /TID=Mm.24001.1 /TIER=FL /STK=2 /UG=Mm.24001 /LL=17260 /DEF=Mus musculus myocyte enhancer factor 2C (Mef2c), mRNA. /PROD=myocyte enhancer factor 2C /FL=gb:NM_025282.1
1460479_at	112	1039	9.28	A330094K24Rik	RIKEN cDNA A330094K24 gene					gb:AK020726.1 /DB_XREF=gi:12861400 /FEA=mRNA /CNT=4 /TID=Mm.177999.1 /TIER=ConsEnd /STK=3 /UG=Mm.177999 /LL=77093 /UG_GENE=A330094K24Rik /UG_TITLE=RIKEN cDNA A330094K24 gene /DEF=Mus musculus adult male spinal cord cDNA, RIKEN full-length enriched library, clone:A330094K24:unclassifiable transcript, full insert sequence.
1424895_at	599	4771	7.97	Gpsm2	G-protein signalling modulator 2 (AGS3-like, C. elegans)					gb:BC021308.1 /DB_XREF=gi:18204661 /FEA=FLmRNA /CNT=32 /TID=Mm.220948.1 /TIER=FL+Stack /STK=12 /UG=Mm.220948 /LL=76123 /UG_GENE=6230410J09Rik /DEF=Mus musculus, Similar to LGN protein, clone MGC:29185 IMAGE:5007832, mRNA, complete cds. /PROD=Similar to LGN protein /FL=gb:BC021308.1
1425878_at	415	3216	7.75	Cabp4	Calcium binding protein 4	1456936_at				gb:AY039218.1 /DB_XREF=gi:18031756 /FEA=FLmRNA /CNT=4 /TID=Mm.216448.1 /TIER=FL /STK=1 /UG=Mm.216448 /DEF=Mus musculus calcium-binding protein CaBP4 mRNA, complete cds. /PROD=calcium-binding protein CaBP4 /FL=gb:AY039218.1
1449421_a_at	427	3181	7.45	Kcne2	Potassium voltage-gated channel, Isk-related subfamily, gene 2					gb:NM_134110.1 /DB_XREF=gi:19882204 /GEN=2200002I16Rik /FEA=FLmRNA /CNT=17 /TID=Mm.156736.1 /TIER=FL+Stack /STK=11 /UG=Mm.156736 /LL=106387 /DEF=Mus musculus RIKEN cDNA 2200002I16 gene (2200002I16Rik), mRNA. /PROD=minK-related peptide 1 /FL=gb:NM_134110.1
1435189_at	236	1749	7.41	Frmpd1	FERM and PDZ domain containing 1					gb:BM213356 /DB_XREF=gi:17771213 /DB_XREF=C0835C02-3 /CLONE=C0835C02 /FEA=EST /CNT=25 /TID=Mm.24783.1 /TIER=Stack /STK=19 /UG=Mm.24783 /UG_TITLE=ESTs, Highly similar to KIAA0967 protein (H.sapiens)
1444230_at	186	1333	7.17	BB279920	Transcribed locus					gb:BB279920 /DB_XREF=gi:8976943 /DB_XREF=BB279920 /CLONE=A930021M13 /FEA=EST /CNT=5 /TID=Mm.125511.1 /TIER=ConsEnd /STK=2 /UG=Mm.125511 /UG_TITLE=ESTs, Weakly similar to A34615 profilaggrin - rat (R.norvegicus)
1420511_at	303	2086	6.88	Rds	Retinal degeneration, slow (retinitis pigmentosa 7)					gb:NM_008938.1 /DB_XREF=gi:7110698 /GEN=Prph2 /FEA=FLmRNA /CNT=35 /TID=Mm.5032.1 /TIER=FL /STK=4 /UG=Mm.5032 /LL=19133 /DEF=Mus musculus peripherin 2 (Prph2), mRNA. /PROD=peripherin 2 /FL=gb:NM_008938.1
1421144_at	739	4898	6.63	Rpgrip1	Retinitis pigmentosa GTPase regulator interacting protein 1	1451785_at	1454231_a_at	1431357_a_at		gb:NM_023879.1 /DB_XREF=gi:13569851 /GEN=Rpgrip1 /FEA=FLmRNA /CNT=35 /TID=Mm.21662.1 /TIER=FL /STK=2 /UG=Mm.21662 /LL=77945 /DEF=Mus musculus retinitis pigmentosa GTPase regulator interacting protein 1 (Rpgrip1), mRNA. /PROD=retinitis pigmentosa GTPase regulatorinteracting protein 1 /FL=gb:AY008297.1 gb:NM_023879.1
1436402_at	579	3710	6.41	Hlrc1	HEAT-like (PBS lyase) repeat containing 1					gb:BG292769 /DB_XREF=gi:13051936 /DB_XREF=602389453F1 /CLONE=IMAGE:4501357 /FEA=EST /CNT=14 /TID=Mm.4022.2 /TIER=Stack /STK=9 /UG=Mm.4022 /LL=102115 /UG_GENE=1110033C18Rik /UG_TITLE=RIKEN cDNA 1110033C18 gene
1426035_at	244	1507	6.19	LOC574418	Hypothetical LOC574418					gb:BC026459.1 /DB_XREF=gi:20071427 /FEA=FLmRNA /CNT=1 /TID=Mm.200975.2 /TIER=FL /STK=1 /UG=Mm.200975 /LL=20366 /UG_GENE=Serf2 /DEF=Mus musculus, clone MGC:31450 IMAGE:4481776, mRNA, complete cds. /PROD=Unknown (protein for MGC:31450) /FL=gb:BC026459.1
1457701_at	720	4293	5.96	Tmem136	Transmembrane protein 136					gb:BB457336 /DB_XREF=gi:16426144 /DB_XREF=BB457336 /CLONE=D130051F08 /FEA=EST /CNT=8 /TID=Mm.133032.1 /TIER=ConsEnd /STK=3 /UG=Mm.133032 /UG_TITLE=ESTs
1423611_at	295	1741	5.91	Akp2	Alkaline phosphatase 2, liver					gb:AW319615 /DB_XREF=gi:6749159 /DB_XREF=um99d08.x1 /CLONE=IMAGE:2352879 /FEA=FLmRNA /CNT=175 /TID=Mm.1265.1 /TIER=Stack /STK=8 /UG=Mm.1265 /LL=11647 /UG_GENE=Akp2 /UG_TITLE=alkaline phosphatase 2, liver /FL=gb:J02980.1 gb:NM_007431.1
1434297_at	205	1187	5.78	E130304F04Rik	RIKEN cDNA E130304F04 gene					gb:BB359887 /DB_XREF=gi:16405851 /DB_XREF=BB359887 /CLONE=C030043O08 /FEA=EST /CNT=47 /TID=Mm.38058.1 /TIER=Stack /STK=36 /UG=Mm.38058 /UG_TITLE=ESTs, Weakly similar to PUTATIVE SERINETHREONINE-PROTEIN KINASE MSK (M.musculus)
1446754_a_at	241	1373	5.7	Vax2os1	Vax2 opposite strand transcript 1	1443232_at				gb:BM936191 /DB_XREF=gi:19395343 /DB_XREF=UI-M-CG0p-bqa-g-09-0-UI.r1 /CLONE=UI-M-CG0p-bqa-g-09-0-UI /FEA=EST /CNT=2 /TID=Mm.185937.2 /TIER=ConsEnd /STK=2 /UG=Mm.185937 /UG_TITLE=ESTs
1451210_at	711	4020	5.66	Ppap2c	Phosphatidic acid phosphatase type 2c					gb:BC010332.1 /DB_XREF=gi:16307570 /FEA=FLmRNA /CNT=117 /TID=Mm.28873.2 /TIER=FL+Stack /STK=62 /UG=Mm.28873 /LL=50784 /UG_GENE=Ppap2c /DEF=Mus musculus, phosphatidic acid phosphatase type 2c, clone MGC:6301 IMAGE:2654393, mRNA, complete cds. /PROD=phosphatidic acid phosphatase type 2c /FL=gb:BC010332.1
1422090_a_at	194	1073	5.52	Pfkfb2	6-phosphofructo-2-kinase/fructose-2,6-biphosphatase 2	1429486_at	1431901_a_at	1422091_at		gb:NM_008825.1 /DB_XREF=gi:6679284 /GEN=Pfkfb2 /FEA=FLmRNA /CNT=10 /TID=Mm.4255.1 /TIER=FL /STK=1 /UG=Mm.4255 /LL=18640 /DEF=Mus musculus 6-phosphofructo-2-kinasefructose-2,6-biphosphatase 2 (Pfkfb2), mRNA. /PROD=6-phosphofructo-2-kinasefructose-2,6-biphosphatase 2 /FL=gb:NM_008825.1 gb:BC018418.1
1423862_at	284	1513	5.33	Plekhf2	Pleckstrin homology domain containing, family F (with FYVE domain) member 2					gb:BE986504 /DB_XREF=gi:10660902 /DB_XREF=UI-M-CG0p-bev-c-05-0-UI.s1 /CLONE=UI-M-CG0p-bev-c-05-0-UI /FEA=FLmRNA /CNT=159 /TID=Mm.34351.1 /TIER=Stack /STK=16 /UG=Mm.34351 /UG_TITLE=Mus musculus, Similar to hypothetical protein FLJ13187, clone MGC:28979 IMAGE:4503757, mRNA, complete cds /FL=gb:BC016134.1
1450162_at	236	1173	4.97	Dpf3	D4, zinc and double PHD fingers, family 3					gb:NM_058212.1 /DB_XREF=gi:17158030 /GEN=Cerd4-pending /FEA=FLmRNA /CNT=18 /TID=Mm.45029.1 /TIER=FL /STK=2 /UG=Mm.45029 /LL=70127 /DEF=Mus musculus cerebellum D4 (Cerd4-pending), mRNA. /PROD=cerebellum D4 /FL=gb:AF362750.1 gb:NM_058212.1
1419647_a_at	715	3431	4.8	Ier3	Immediate early response 3					gb:NM_133662.1 /DB_XREF=gi:19526807 /GEN=Ier3 /FEA=FLmRNA /CNT=77 /TID=Mm.25613.1 /TIER=FL /STK=7 /UG=Mm.25613 /LL=15937 /DEF=Mus musculus immediate early response 3 (Ier3), mRNA. /PROD=immediate early response 3 /FL=gb:BC006950.1 gb:NM_133662.1
1424312_at	644	3089	4.8	Adipor1	Adiponectin receptor 1	1451311_a_at	1439017_x_at			gb:BG065410 /DB_XREF=gi:12547973 /DB_XREF=H3030G10-3 /CLONE=H3030G10 /FEA=FLmRNA /CNT=192 /TID=Mm.205010.1 /TIER=Stack /STK=9 /UG=Mm.205010 /LL=72674 /UG_GENE=2810031L11Rik /UG_TITLE=RIKEN cDNA 2810031L11 gene /FL=gb:BC014875.1
1448169_at	746	3522	4.72	Krt1-18	Keratin complex 1, acidic, gene 18					gb:NM_010664.1 /DB_XREF=gi:6754481 /GEN=Krt1-18 /FEA=FLmRNA /CNT=380 /TID=Mm.22479.1 /TIER=FL+Stack /STK=149 /UG=Mm.22479 /LL=16668 /DEF=Mus musculus keratin complex 1, acidic, gene 18 (Krt1-18), mRNA. /PROD=keratin complex 1, acidic, gene 18 /FL=gb:M36376.1 gb:NM_010664.1 gb:M11686.1
1449588_at	1011	4388	4.34	Abca4	ATP-binding cassette, sub-family A (ABC1), member 4					gb:NM_007378.1 /DB_XREF=gi:6671494 /GEN=Abca4 /FEA=FLmRNA /CNT=23 /TID=Mm.3918.1 /TIER=FL /STK=6 /UG=Mm.3918 /LL=11304 /DEF=Mus musculus ATP-binding cassette, sub-family A (ABC1), member 4 (Abca4), mRNA. /PROD=ATP-binding cassette, sub-family A, member 4 /FL=gb:NM_007378.1 gb:AF000149.1
1425891_a_at	435	1877	4.32	Grtp1	GH regulated TBC protein 1	1439150_x_at				gb:AF329833.1 /DB_XREF=gi:18307766 /FEA=FLmRNA /CNT=3 /TID=Mm.34901.2 /TIER=FL /STK=1 /UG=Mm.34901 /LL=66790 /UG_GENE=Grtp1 /DEF=Mus musculus GH regulated TBC protein-1 mRNA, complete cds. /PROD=GH regulated TBC protein-1 /FL=gb:AF329833.1
1457083_at	669	2853	4.27	BB278392	Transcribed locus					gb:BB278392 /DB_XREF=gi:16401065 /DB_XREF=BB278392 /CLONE=A930010M14 /FEA=EST /CNT=7 /TID=Mm.134533.1 /TIER=ConsEnd /STK=5 /UG=Mm.134533 /UG_TITLE=ESTs
1457254_x_at	789	3357	4.25	6330442E10Rik	RIKEN cDNA 6330442E10 gene					gb:BB302103 /DB_XREF=gi:9002808 /DB_XREF=BB302103 /CLONE=B230034N21 /FEA=EST /CNT=5 /TID=Mm.119806.1 /TIER=ConsEnd /STK=5 /UG=Mm.119806 /UG_TITLE=ESTs
1450816_at	527	2231	4.23	Polg2	Polymerase (DNA directed), gamma 2, accessory subunit					gb:NM_015810.1 /DB_XREF=gi:7657466 /GEN=Polg2 /FEA=FLmRNA /CNT=18 /TID=Mm.859.1 /TIER=FL /STK=0 /UG=Mm.859 /LL=50776 /DEF=Mus musculus polymerase, gamma 2 (Polg2), mRNA. /PROD=mitochondrial polymerase gamma 2 /FL=gb:NM_015810.1 gb:AF177202.1
1454632_at	1004	4047	4.03	6330442E10Rik	RIKEN cDNA 6330442E10 gene					gb:AV328515 /DB_XREF=gi:16395893 /DB_XREF=AV328515 /CLONE=6330442E10 /FEA=EST /CNT=128 /TID=Mm.18957.1 /TIER=Stack /STK=113 /UG=Mm.18957 /UG_TITLE=ESTs, Weakly similar to FOR4 MOUSE FORMIN 4 (M.musculus)
1428680_at	916	3685	4.02	Cds1	CDP-diacylglycerol synthase 1					gb:AK014670.1 /DB_XREF=gi:12852667 /FEA=mRNA /CNT=41 /TID=Mm.46764.1 /TIER=Stack /STK=26 /UG=Mm.46764 /LL=74596 /UG_GENE=4833409J18Rik /UG_TITLE=RIKEN cDNA 4833409J18 gene /DEF=Mus musculus 0 day neonate head cDNA, RIKEN full-length enriched library, clone:4833409J18:unclassifiable transcript, full insert sequence.
1423636_at	400	1607	4.01	Wdr31	WD repeat domain 31	1459664_at				gb:AK017259.1 /DB_XREF=gi:12856408 /FEA=FLmRNA /CNT=20 /TID=Mm.155573.1 /TIER=Stack /STK=8 /UG=Mm.155573 /LL=71354 /UG_GENE=5430402I10Rik /UG_TITLE=RIKEN cDNA 5430402I10 gene /DEF=Mus musculus 6 days neonate head cDNA, RIKEN full-length enriched library, clone:5430402I10:SPERMATID WD-REPEAT PROTEIN, full insert sequence. /FL=gb:NM_023597.1 gb:AF274321.1
1450770_at	262	1043	3.97	3632451O06Rik	RIKEN cDNA 3632451O06 gene					gb:BC023359.1 /DB_XREF=gi:19484220 /FEA=FLmRNA /CNT=62 /TID=Mm.86928.1 /TIER=FL+Stack /STK=10 /UG=Mm.86928 /LL=67419 /UG_GENE=3632451O06Rik /DEF=Mus musculus, Similar to RIKEN cDNA 3632451O06 gene, clone MGC:32460 IMAGE:5043946, mRNA, complete cds. /PROD=Similar to RIKEN cDNA 3632451O06 gene /FL=gb:NM_026142.1 gb:BC023359.1
1422832_at	523	2046	3.92	Rgr	Retinal G protein coupled receptor					gb:NM_021340.1 /DB_XREF=gi:10946655 /GEN=Rgr /FEA=FLmRNA /CNT=27 /TID=Mm.20460.1 /TIER=FL+Stack /STK=10 /UG=Mm.20460 /LL=57811 /DEF=Mus musculus retinal G protein coupled receptor (Rgr), mRNA. /PROD=retinal G protein coupled receptor /FL=gb:NM_021340.1 gb:AF076930.1
1435096_at	1047	4017	3.84	Ric8b	Resistance to inhibitors of cholinesterase 8 homolog B (C. elegans)					gb:BB667093 /DB_XREF=gi:16398542 /DB_XREF=BB667093 /CLONE=4022435G01 /FEA=EST /CNT=31 /TID=Mm.18936.1 /TIER=Stack /STK=20 /UG=Mm.18936 /UG_TITLE=ESTs, Weakly similar to synembryn (Mus musculus) (M.musculus)
1443940_at	764	2883	3.77	Lrrc22	Leucine rich repeat containing 22					gb:BB278297 /DB_XREF=gi:15410987 /DB_XREF=BB278297 /CLONE=A930010E21 /FEA=EST /CNT=9 /TID=Mm.134302.1 /TIER=ConsEnd /STK=2 /UG=Mm.134302 /UG_TITLE=ESTs, Weakly similar to T42626 secreted leucine-rich repeat-containing protein SLIT2 - mouse (fragment) (M.musculus)
1426059_at	331	1249	3.77	Gckr	Glucokinase regulatory protein					gb:BC012412.1 /DB_XREF=gi:15214573 /FEA=FLmRNA /CNT=1 /TID=Mm.100043.1 /TIER=FL /STK=1 /UG=Mm.100043 /DEF=Mus musculus, Similar to Glucokinase regulatory protein, clone MGC:19300 IMAGE:4159892, mRNA, complete cds. /PROD=Similar to Glucokinase regulatory protein /FL=gb:BC012412.1
1451053_a_at	1011	3788	3.75	Mdm1	Transformed mouse 3T3 cell double minute 1					gb:AV313203 /DB_XREF=gi:6278455 /DB_XREF=AV313203 /CLONE=5830408H18 /FEA=FLmRNA /CNT=65 /TID=Mm.2003.1 /TIER=Stack /STK=8 /UG=Mm.2003 /LL=17245 /UG_GENE=Mdm1 /UG_TITLE=transformed mouse 3T3 cell double minute 1 /FL=gb:NM_010785.1 gb:M20824.1
1443569_at	553	2037	3.68	4930430E16Rik	RIKEN cDNA 4930430E16 gene	1451653_a_at				gb:BB214806 /DB_XREF=gi:16352985 /DB_XREF=BB214806 /CLONE=A530023B02 /FEA=EST /CNT=3 /TID=Mm.131739.1 /TIER=ConsEnd /STK=3 /UG=Mm.131739 /UG_TITLE=ESTs
1425506_at	789	2732	3.46	Mylk	Myosin, light polypeptide kinase					gb:BF451748 /DB_XREF=gi:11517917 /DB_XREF=uz78g06.y1 /CLONE=IMAGE:3675226 /FEA=FLmRNA /CNT=74 /TID=Mm.27680.1 /TIER=ConsEnd /STK=0 /UG=Mm.27680 /UG_TITLE=Mus musculus telokin mRNA, complete cds /FL=gb:AF314149.1
1452534_a_at	328	1125	3.43	Hmgb2	High mobility group box 2					gb:X67668.1 /DB_XREF=gi:51338 /GEN=hmg2 /FEA=mRNA /CNT=1 /TID=Mm.1693.2 /TIER=ConsEnd /STK=0 /UG=Mm.1693 /LL=15352 /DEF=M.musculus mRNA for high mobility group 2 protein. /PROD=high mobility group 2 protein
1450415_at	1190	4034	3.39	Pde6a	Phosphodiesterase 6A, cGMP-specific, rod, alpha					gb:NM_008805.1 /DB_XREF=gi:6679252 /GEN=Pde6a /FEA=FLmRNA /CNT=32 /TID=Mm.1370.1 /TIER=FL /STK=1 /UG=Mm.1370 /LL=18586 /DEF=Mus musculus phosphodiesterase 6A, cGMP-specific, rod, alpha (Pde6a), mRNA. /PROD=phosphodiesterase 6A, cGMP-specific, rod, alpha /FL=gb:NM_008805.1
1443694_at	448	1487	3.32	BB794177	Transcribed locus					gb:BB794177 /DB_XREF=gi:16963796 /DB_XREF=BB794177 /CLONE=G430149D04 /FEA=EST /CNT=3 /TID=Mm.188120.1 /TIER=ConsEnd /STK=3 /UG=Mm.188120 /UG_TITLE=ESTs, Weakly similar to S26689 hypothetical protein hc1 - mouse (M.musculus)
1433590_at	613	2019	3.3	Herc3	Hect domain and RLD 3					gb:BM239854 /DB_XREF=gi:17875124 /DB_XREF=K0541E04-3 /CLONE=K0541E04 /FEA=EST /CNT=120 /TID=Mm.33788.2 /TIER=Stack /STK=86 /UG=Mm.33788 /LL=73998 /UG_GENE=Herc3 /UG_TITLE=hect domain and RLD 3
1423938_at	338	1092	3.23	Llgl2	Lethal giant larvae homolog 2 (Drosophila)					gb:AY033650.1 /DB_XREF=gi:14132793 /FEA=FLmRNA /CNT=120 /TID=Mm.3747.1 /TIER=FL+Stack /STK=76 /UG=Mm.3747 /DEF=Mus musculus lethal giant larvae-like protein 2 mRNA, complete cds. /PROD=lethal giant larvae-like protein 2 /FL=gb:AY033650.1
1425637_at	715	2256	3.15	BC016247	Transcribed locus					gb:BC016247.1 /DB_XREF=gi:16740746 /FEA=FLmRNA /CNT=21 /TID=Mm.220345.1 /TIER=FL /STK=1 /UG=Mm.220345 /DEF=Mus musculus, Similar to KIAA0513 gene product, clone MGC:28863 IMAGE:4511670, mRNA, complete cds. /PROD=Similar to KIAA0513 gene product /FL=gb:BC016247.1
1452672_at	630	1977	3.14	Thoc5	THO complex 5					gb:AK006840.1 /DB_XREF=gi:12840117 /FEA=mRNA /CNT=125 /TID=Mm.28969.1 /TIER=Stack /STK=102 /UG=Mm.28969 /LL=73404 /UG_GENE=1700060C24Rik /UG_TITLE=RIKEN cDNA 1700060C24 gene /DEF=Mus musculus adult male testis cDNA, RIKEN full-length enriched library, clone:1700060C24:homolog to PLACENTAL PROTEIN (FRAGMENT), full insert sequence.
1455803_at	565	1775	3.14	Slco4a1	Solute carrier organic anion transporter family, member 4a1					gb:AV375182 /DB_XREF=gi:16397981 /DB_XREF=AV375182 /CLONE=9130022F15 /FEA=EST /CNT=72 /TID=Mm.133687.1 /TIER=Stack /STK=66 /UG=Mm.133687 /UG_TITLE=ESTs, Weakly similar to RIKEN cDNA 1700022M03 (Mus musculus) (M.musculus)
1436215_at	1143	3572	3.13	Ipmk	Inositol polyphosphate multikinase	1437856_at	1456200_at			gb:BB081797 /DB_XREF=gi:16260675 /DB_XREF=BB081797 /CLONE=9330171D09 /FEA=EST /CNT=14 /TID=Mm.12055.1 /TIER=Stack /STK=10 /UG=Mm.12055 /LL=103077 /UG_GENE=AA408208 /UG_TITLE=expressed sequence AA408208
1424735_at	507	1578	3.11	Slc25a25	Solute carrier family 25 (mitochondrial carrier, phosphate carrier), member 25					gb:BC019978.1 /DB_XREF=gi:18043564 /FEA=FLmRNA /CNT=220 /TID=Mm.37395.1 /TIER=FL+Stack /STK=17 /UG=Mm.37395 /DEF=Mus musculus, Similar to KIAA1896 protein, clone MGC:28954 IMAGE:4239441, mRNA, complete cds. /PROD=Similar to KIAA1896 protein /FL=gb:BC022114.1 gb:BC019978.1
1442019_at	420	1301	3.09	B230343A10Rik	RIKEN cDNA B230343A10 gene					gb:BB627097 /DB_XREF=gi:16464880 /DB_XREF=BB627097 /CLONE=9430058J20 /FEA=EST /CNT=8 /TID=Mm.152121.2 /TIER=ConsEnd /STK=3 /UG=Mm.152121 /UG_TITLE=ESTs
1416893_at	360	1094	3.04	Parl	Presenilin associated, rhomboid-like					gb:NM_025626.1 /DB_XREF=gi:13385087 /GEN=3110001A13Rik /FEA=FLmRNA /CNT=137 /TID=Mm.200627.1 /TIER=FL /STK=1 /UG=Mm.200627 /LL=66540 /DEF=Mus musculus RIKEN cDNA 3110001A13 gene (3110001A13Rik), mRNA. /PROD=RIKEN cDNA 3110001A13 /FL=gb:NM_025626.1 gb:BC021353.1
1454819_at	1101	3326	3.02	BQ031094	Adult male thymus cDNA, RIKEN full-length enriched library, clone:5830435F18 product:unclassifiable, full insert sequence					gb:BQ031094 /DB_XREF=gi:19766373 /DB_XREF=UI-1-CF0-alz-c-03-0-UI.s1 /CLONE=UI-1-CF0-alz-c-03-0-UI /FEA=EST /CNT=50 /TID=Mm.35416.1 /TIER=Stack /STK=44 /UG=Mm.35416 /UG_TITLE=ESTs
1418345_at	759	2287	3.01	Tnfsf13	Tumor necrosis factor (ligand) superfamily, member 13					gb:NM_023517.1 /DB_XREF=gi:12963712 /GEN=Tnfsf13 /FEA=FLmRNA /CNT=47 /TID=Mm.54359.1 /TIER=FL+Stack /STK=25 /UG=Mm.54359 /LL=69583 /DEF=Mus musculus tumor necrosis factor (ligand) superfamily, member 13 (Tnfsf13), mRNA. /PROD=tumor necrosis factor (ligand) superfamily,member 13 /FL=gb:AF294825.1 gb:NM_023517.1
1418808_at	400	1191	3	Rdh5	Retinol dehydrogenase 5					gb:NM_134006.1 /DB_XREF=gi:19549322 /GEN=Rdh5 /FEA=FLmRNA /CNT=28 /TID=Mm.7563.1 /TIER=FL+Stack /STK=18 /UG=Mm.7563 /LL=19682 /DEF=Mus musculus retinol dehydrogenase type 5 (Rdh5), mRNA. /PROD=retinol dehydrogenase type 5 /FL=gb:AF033196.1 gb:NM_134006.1 gb:AF033195.1 gb:AF013288.1 gb:BC021372.1
1442190_at	2	550	284.48	BI736087	PREDICTED: Mus musculus hypothetical protein LOC627272 (LOC627272), mRNA					gb:BI736087 /DB_XREF=gi:15713100 /DB_XREF=603359238F1 /CLONE=IMAGE:5366529 /FEA=EST /CNT=6 /TID=Mm.35149.1 /TIER=ConsEnd /STK=3 /UG=Mm.35149 /UG_TITLE=ESTs, Weakly similar to POL2 MOUSE RETROVIRUS-RELATED POL POLYPROTEIN (M.musculus)
1449393_at	3	421	166.25	Sh2d1a	SH2 domain protein 1A					gb:NM_011364.1 /DB_XREF=gi:6755493 /GEN=Sh2d1a /FEA=FLmRNA /CNT=19 /TID=Mm.20880.1 /TIER=FL+Stack /STK=12 /UG=Mm.20880 /LL=20400 /DEF=Mus musculus SH2 domain protein 1A (Sh2d1a), mRNA. /PROD=SH2 domain protein 1A /FL=gb:AF097633.1 gb:AF097632.1 gb:NM_011364.1 gb:AF072903.1
1440605_at	6	667	115.64	Fscn2	Fascin homolog 2, actin-bundling protein, retinal (Strongylocentrotus purpuratus)					gb:BB279997 /DB_XREF=gi:16401211 /DB_XREF=BB279997 /CLONE=A930022G03 /FEA=EST /CNT=5 /TID=Mm.134230.1 /TIER=ConsEnd /STK=5 /UG=Mm.134230 /UG_TITLE=ESTs, Weakly similar to FASCIN (M.musculus)
1436675_at	3	209	65.16	Wdr63	WD repeat domain 63					gb:AU043001 /DB_XREF=gi:3957236 /DB_XREF=AU043001 /CLONE=J1037B08 /FEA=EST /CNT=8 /TID=Mm.17707.1 /TIER=Stack /STK=8 /UG=Mm.17707 /UG_TITLE=ESTs
1418842_at	9	358	39.3	Hcls1	Hematopoietic cell specific Lyn substrate 1					gb:NM_008225.1 /DB_XREF=gi:6680186 /GEN=Hcls1 /FEA=FLmRNA /CNT=45 /TID=Mm.4091.1 /TIER=FL+Stack /STK=17 /UG=Mm.4091 /LL=15163 /DEF=Mus musculus hematopoietic cell specific Lyn substrate 1 (Hcls1), mRNA. /PROD=hematopoietic cell specific Lyn substrate 1 /FL=gb:D42120.1 gb:NM_008225.1 gb:BC007469.1
1430112_at	17	427	25.82	Wdr66	WD repeat domain 66					gb:AK016965.1 /DB_XREF=gi:12855982 /FEA=mRNA /CNT=5 /TID=Mm.158631.1 /TIER=ConsEnd /STK=4 /UG=Mm.158631 /LL=71245 /UG_GENE=4933428F06Rik /UG_TITLE=RIKEN cDNA 4933428F06 gene /DEF=Mus musculus adult male testis cDNA, RIKEN full-length enriched library, clone:4933428F06:hypothetical protein, full insert sequence.
1418847_at	36	857	23.91	Arg2	Arginase type II	1438841_s_at				gb:NM_009705.1 /DB_XREF=gi:6753109 /GEN=Arg2 /FEA=FLmRNA /CNT=38 /TID=Mm.3506.1 /TIER=FL+Stack /STK=17 /UG=Mm.3506 /LL=11847 /DEF=Mus musculus arginase type II (Arg2), mRNA. /PROD=arginase type II /FL=gb:NM_009705.1 gb:AF032466.1 gb:BC023349.1 gb:U90886.1
1422069_at	7	134	19.72	Mc1r	Melanocortin 1 receptor					gb:NM_008559.1 /DB_XREF=gi:6678817 /GEN=Mc1r /FEA=FLmRNA /CNT=8 /TID=Mm.4983.1 /TIER=FL /STK=1 /UG=Mm.4983 /LL=17199 /DEF=Mus musculus melanocortin 1 receptor (Mc1r), mRNA. /PROD=melanocortin 1 receptor /FL=gb:NM_008559.1
1429647_at	14	269	19.61	1700027L20Rik	RIKEN cDNA 1700027L20 gene					gb:AK006434.1 /DB_XREF=gi:12839534 /FEA=mRNA /CNT=13 /TID=Mm.84618.1 /TIER=Stack /STK=12 /UG=Mm.84618 /LL=69453 /UG_GENE=1700027L20Rik /UG_TITLE=RIKEN cDNA 1700027L20 gene /DEF=Mus musculus adult male testis cDNA, RIKEN full-length enriched library, clone:1700027L20:hypothetical protein, full insert sequence.
1443552_at	13	206	15.51	E230008N13Rik	RIKEN cDNA E230008N13 gene					gb:BM932485 /DB_XREF=gi:19391637 /DB_XREF=UI-M-BH2.1-ape-e-11-0-UI.r1 /CLONE=UI-M-BH2.1-ape-e-11-0-UI /FEA=EST /CNT=3 /TID=Mm.54220.1 /TIER=ConsEnd /STK=3 /UG=Mm.54220 /UG_TITLE=ESTs, Weakly similar to KIAA1529 protein (H.sapiens)
1442242_at	50	746	14.89	C79127	Expressed sequence C79127					gb:BB277133 /DB_XREF=gi:15410921 /DB_XREF=BB277133 /CLONE=A930002H20 /FEA=EST /CNT=5 /TID=Mm.134068.1 /TIER=ConsEnd /STK=3 /UG=Mm.134068 /LL=97371 /UG_GENE=C79127 /UG_TITLE=expressed sequence C79127
1421698_a_at	19	279	14.77	Col19a1	Procollagen, type XIX, alpha 1					gb:NM_007733.1 /DB_XREF=gi:6680965 /GEN=Col19a1 /FEA=FLmRNA /CNT=2 /TID=Mm.6252.1 /TIER=FL /STK=2 /UG=Mm.6252 /LL=12823 /DEF=Mus musculus procollagen, type XIX, alpha 1 (Col19a1), mRNA. /PROD=procollagen, type XIX, alpha 1 /FL=gb:AB000636.1 gb:NM_007733.1
1434573_at	33	449	13.69	Traf3ip3	TRAF3 interacting protein 3					gb:BE986588 /DB_XREF=gi:10661071 /DB_XREF=UI-M-CG0p-bew-c-09-0-UI.s1 /CLONE=UI-M-CG0p-bew-c-09-0-UI /FEA=EST /CNT=47 /TID=Mm.70956.1 /TIER=Stack /STK=29 /UG=Mm.70956 /LL=98261 /UG_GENE=AI115021 /UG_TITLE=expressed sequence AI115021
1418552_at	48	634	13.34	Opn1sw	Opsin 1 (cone pigments), short-wave-sensitive (color blindness, tritan)	1449132_at				gb:BC026021.1 /DB_XREF=gi:19683961 /FEA=FLmRNA /CNT=42 /TID=Mm.56987.1 /TIER=FL /STK=1 /UG=Mm.56987 /LL=12057 /UG_GENE=Opn1sw /DEF=Mus musculus, opsin 1 (cone pigments), short-wave-sensitive (color blindness, tritan), clone MGC:28865 IMAGE:4511808, mRNA, complete cds. /PROD=opsin 1 (cone pigments), short-wave-sensitive(color blindness, tritan) /FL=gb:BC026021.1 gb:AF190670.1 gb:U49720.1 gb:NM_007…
1417280_at	40	536	13.28	Slc17a1	Solute carrier family 17 (sodium phosphate), member 1					gb:NM_009198.1 /DB_XREF=gi:6677998 /GEN=Slc17a1 /FEA=FLmRNA /CNT=83 /TID=Mm.2656.1 /TIER=FL+Stack /STK=50 /UG=Mm.2656 /LL=20504 /DEF=Mus musculus solute carrier family 17 vesicular glutamate transporter), member 1 (Slc17a1), mRNA. /PROD=solute carrier family 17 vesicular glutamatetransporter), member 1 /FL=gb:NM_009198.1 gb:BC013445.1
1425746_at	9	117	12.4	D730039F16Rik	RIKEN cDNA D730039F16 gene					gb:BC021771.1 /DB_XREF=gi:18255680 /FEA=FLmRNA /CNT=9 /TID=Mm.215255.1 /TIER=FL /STK=1 /UG=Mm.215255 /DEF=Mus musculus, Similar to RIKEN cDNA D730039F16 gene, clone MGC:28541 IMAGE:4194825, mRNA, complete cds. /PROD=Similar to RIKEN cDNA D730039F16 gene /FL=gb:BC021771.1
1441518_at	17	200	11.94	BB277231	Adult retina cDNA, RIKEN full-length enriched library, clone:A930003C13 product:unclassifiable, full insert sequence					gb:BB277231 /DB_XREF=gi:16400956 /DB_XREF=BB277231 /CLONE=A930003C13 /FEA=EST /CNT=4 /TID=Mm.115892.1 /TIER=ConsEnd /STK=4 /UG=Mm.115892 /UG_TITLE=ESTs
1444603_at	35	410	11.85	2810030D12Rik	RIKEN cDNA 2810030D12 gene					gb:AI648973 /DB_XREF=gi:4729807 /DB_XREF=uk33f01.x1 /CLONE=IMAGE:1970809 /FEA=EST /CNT=4 /TID=Mm.74819.1 /TIER=ConsEnd /STK=2 /UG=Mm.74819 /UG_TITLE=ESTs
1436287_at	29	318	11.01	BF466943	13 days embryo head cDNA, RIKEN full-length enriched library, clone:3110033I20 product:hypothetical protein, full insert sequence					gb:BF466943 /DB_XREF=gi:11536126 /DB_XREF=UI-M-CG0p-brb-g-11-0-UI.s1 /CLONE=UI-M-CG0p-brb-g-11-0-UI /FEA=EST /CNT=10 /TID=Mm.58847.1 /TIER=Stack /STK=10 /UG=Mm.58847 /UG_TITLE=ESTs
1446715_at	51	552	10.85	Abca13	ATP-binding cassette, sub-family A (ABC1), member 13					gb:BB503961 /DB_XREF=gi:16442673 /DB_XREF=BB503961 /CLONE=D630045O20 /FEA=EST /CNT=2 /TID=Mm.44160.1 /TIER=ConsEnd /STK=2 /UG=Mm.44160 /UG_TITLE=ESTs
1426027_a_at	16	174	10.67	Arhgap10	Rho GTPase activating protein 10	1459609_at				gb:AF297029.1 /DB_XREF=gi:13310134 /FEA=FLmRNA /CNT=1 /TID=Mm.165974.2 /TIER=FL /STK=1 /UG=Mm.165974 /LL=78514 /UG_GENE=A930033B01Rik /DEF=Mus musculus PSGAP-s mRNA, complete cds, alternatively spliced. /PROD=PSGAP-s /FL=gb:AF297029.1
1453143_at	30	309	10.36	4921509F24Rik	RIKEN cDNA 4921509F24 gene					gb:AK014852.1 /DB_XREF=gi:12852935 /FEA=mRNA /CNT=23 /TID=Mm.78118.1 /TIER=Stack /STK=21 /UG=Mm.78118 /LL=70893 /UG_GENE=4921509F24Rik /UG_TITLE=RIKEN cDNA 4921509F24 gene /DEF=Mus musculus adult male testis cDNA, RIKEN full-length enriched library, clone:4921509F24:similar to BETA-GALACTOSIDASE PRECURSOR (EC 3.2.1.23) (LACTASE) (ACID BETA- GALACTOSIDASE), full insert sequence.
1456834_at	66	657	9.92	Ibrdc2	IBR domain containing 2					gb:BB277828 /DB_XREF=gi:16401023 /DB_XREF=BB277828 /CLONE=A930007K23 /FEA=EST /CNT=7 /TID=Mm.107320.1 /TIER=ConsEnd /STK=7 /UG=Mm.107320 /UG_TITLE=ESTs
1442249_at	23	205	8.79	BB283887	Transcribed locus					gb:BB283887 /DB_XREF=gi:16401406 /DB_XREF=BB283887 /CLONE=A930103L05 /FEA=EST /CNT=5 /TID=Mm.134465.1 /TIER=ConsEnd /STK=3 /UG=Mm.134465 /UG_TITLE=ESTs
1417859_at	92	781	8.48	Gas7	Growth arrest specific 7					gb:NM_008088.1 /DB_XREF=gi:6679944 /GEN=Gas7 /FEA=FLmRNA /CNT=45 /TID=Mm.3257.1 /TIER=FL+Stack /STK=35 /UG=Mm.3257 /LL=14457 /DEF=Mus musculus growth arrest specific 7 (Gas7), mRNA. /PROD=growth arrest specific 7 /FL=gb:NM_008088.1 gb:U19860.1
1443066_at	54	457	8.4	BB280150	Transcribed locus					gb:BB280150 /DB_XREF=gi:15411074 /DB_XREF=BB280150 /CLONE=A930023O03 /FEA=EST /CNT=3 /TID=Mm.134239.1 /TIER=ConsEnd /STK=3 /UG=Mm.134239 /UG_TITLE=ESTs, Moderately similar to EPIDERMAL GROWTH FACTOR PRECURSOR (M.musculus)
1418789_at	62	522	8.37	Sntg2	Syntrophin, gamma 2					gb:NM_133742.1 /DB_XREF=gi:19526943 /GEN=2210008K22Rik /FEA=FLmRNA /CNT=36 /TID=Mm.95705.1 /TIER=FL+Stack /STK=18 /UG=Mm.95705 /LL=72291 /DEF=Mus musculus RIKEN cDNA 2210008K22 gene (2210008K22Rik), mRNA. /PROD=RIKEN cDNA 2210008K22 /FL=gb:NM_133742.1 gb:AF367760.1
1441218_at	25	207	8.32	ttc21a	Tetratricopeptide repeat domain 21A	1442472_at				gb:AV272776 /DB_XREF=gi:16390194 /DB_XREF=AV272776 /CLONE=4931433J21 /FEA=EST /CNT=5 /TID=Mm.189573.1 /TIER=ConsEnd /STK=4 /UG=Mm.189573 /UG_TITLE=ESTs
1430930_at	34	275	8.13	Arhgap10	Rho GTPase activating protein 10					gb:AK002788.1 /DB_XREF=gi:12833028 /FEA=mRNA /CNT=3 /TID=Mm.158360.1 /TIER=ConsEnd /STK=1 /UG=Mm.158360 /LL=70345 /UG_GENE=0610038B21Rik /UG_TITLE=RIKEN cDNA 0610038B21 gene /DEF=Mus musculus adult male kidney cDNA, RIKEN full-length enriched library, clone:0610038B21:hypothetical protein, full insert sequence.
1436285_at	29	221	7.73	BC060957	CDNA sequence BC060957					gb:AV279772 /DB_XREF=gi:16391317 /DB_XREF=AV279772 /CLONE=4933409I22 /FEA=EST /CNT=10 /TID=Mm.41312.1 /TIER=Stack /STK=10 /UG=Mm.41312 /UG_TITLE=ESTs
1448393_at	32	236	7.47	Cldn7	Claudin 7					gb:BC008104.1 /DB_XREF=gi:14198076 /FEA=FLmRNA /CNT=183 /TID=Mm.42189.1 /TIER=FL+Stack /STK=79 /UG=Mm.42189 /LL=53624 /UG_GENE=Cldn7 /DEF=Mus musculus, claudin 7, clone MGC:7108 IMAGE:3157774, mRNA, complete cds. /PROD=claudin 7 /FL=gb:BC008104.1 gb:NM_016887.1 gb:AF087825.1
1440150_at	57	416	7.28	Tgm3	Transglutaminase 3, E polypeptide					gb:AI893889 /DB_XREF=gi:5599791 /DB_XREF=ma88e06.x1 /CLONE=IMAGE:317794 /FEA=EST /CNT=6 /TID=Mm.39047.1 /TIER=ConsEnd /STK=6 /UG=Mm.39047 /LL=99129 /UG_GENE=AI893889 /UG_TITLE=expressed sequence AI893889
1424977_at	31	222	7.24	4930418G15Rik	RIKEN cDNA 4930418G15 gene	1430283_s_at				gb:BC022722.1 /DB_XREF=gi:18490770 /FEA=FLmRNA /CNT=13 /TID=Mm.60650.1 /TIER=FL+Stack /STK=10 /UG=Mm.60650 /LL=69312 /UG_GENE=1700011J18Rik /DEF=Mus musculus, RIKEN cDNA 1700011J18 gene, clone MGC:31545 IMAGE:4503172, mRNA, complete cds. /PROD=RIKEN cDNA 1700011J18 gene /FL=gb:BC022722.1
1442180_at	57	376	6.59	Dleu7	Deleted in lymphocytic leukemia, 7					gb:BB382040 /DB_XREF=gi:16408049 /DB_XREF=BB382040 /CLONE=C230017D13 /FEA=EST /CNT=6 /TID=Mm.127330.1 /TIER=ConsEnd /STK=3 /UG=Mm.127330 /UG_TITLE=ESTs
1419695_at	30	189	6.37	St8sia1	ST8 alpha-N-acetyl-neuraminide alpha-2,8-sialyltransferase 1	1455695_at				gb:NM_011374.1 /DB_XREF=gi:6755515 /GEN=Siat8a /FEA=FLmRNA /CNT=30 /TID=Mm.12826.1 /TIER=ConsEnd /STK=0 /UG=Mm.12826 /LL=20449 /DEF=Mus musculus sialyltransferase 8 (alpha-2, 8-sialytransferase) A (Siat8a), mRNA. /PROD=sialyltransferase 8 (alpha-2,8-sialytransferase) A /FL=gb:NM_011374.1 gb:L38677.1
1443669_at	56	346	6.19	Zfyve28	Zinc finger, FYVE domain containing 28					gb:BE955157 /DB_XREF=gi:10598412 /DB_XREF=UI-M-BH4-bbf-b-04-0-UI.s1 /CLONE=UI-M-BH4-bbf-b-04-0-UI /FEA=EST /CNT=3 /TID=Mm.86612.1 /TIER=ConsEnd /STK=3 /UG=Mm.86612 /UG_TITLE=ESTs
1420725_at	111	660	5.95	NM_138758	Transcribed locus	1420726_x_at	1420727_a_at			gb:NM_138758.1 /DB_XREF=gi:20270296 /GEN=Tmlh /FEA=FLmRNA /CNT=8 /TID=Mm.139078.1 /TIER=FL /STK=3 /UG=Mm.139078 /LL=192289 /DEF=Mus musculus epsilon-trimethyllysine 2-oxoglutarate dioxygenase (Tmlh), mRNA. /PROD=epsilon-trimethyllysine 2-oxoglutaratedioxygenase /FL=gb:NM_138758.1 gb:AY033513.1 gb:BC010495.1
1425919_at	149	880	5.89	BC004633	Transcribed locus					gb:BC004633.1 /DB_XREF=gi:13435515 /FEA=FLmRNA /CNT=2 /TID=Mm.27886.2 /TIER=FL /STK=1 /UG=Mm.27886 /LL=66414 /UG_GENE=2410011G03Rik /DEF=Mus musculus, Similar to RIKEN cDNA 2410011G03 gene, clone MGC:7999 IMAGE:3585797, mRNA, complete cds. /PROD=Similar to RIKEN cDNA 2410011G03 gene /FL=gb:BC004633.1
1421254_a_at	95	553	5.81	Sgcg	Sarcoglycan, gamma (dystrophin-associated glycoprotein)	1437523_s_at				gb:NM_011892.1 /DB_XREF=gi:6755487 /GEN=Sgcg /FEA=FLmRNA /CNT=12 /TID=Mm.72173.1 /TIER=FL /STK=2 /UG=Mm.72173 /LL=24053 /DEF=Mus musculus sarcoglycan, gamma (35kD dystrophin-associated glycoprotein) (Sgcg), mRNA. /PROD=sarcoglycan, gamma (35kD dystrophin-associatedglycoprotein) /FL=gb:NM_011892.1 gb:AB024922.1
1440916_at	31	180	5.79	2510049J12Rik	RIKEN cDNA 2510049J12 gene					gb:BE200006 /DB_XREF=gi:8712175 /DB_XREF=ug56f04.x1 /CLONE=IMAGE:1546399 /FEA=EST /CNT=11 /TID=Mm.133694.1 /TIER=ConsEnd /STK=4 /UG=Mm.133694 /UG_TITLE=ESTs, Weakly similar to W10D9.3.p (Caenorhabditis elegans) (C.elegans)
1450997_at	60	341	5.66	Stk17b	Serine/threonine kinase 17b (apoptosis-inducing)					gb:AV173139 /DB_XREF=gi:16383725 /DB_XREF=AV173139 /CLONE=4432404O09 /FEA=FLmRNA /CNT=149 /TID=Mm.25559.1 /TIER=Stack /STK=20 /UG=Mm.25559 /LL=98267 /UG_GENE=AI120141 /UG_TITLE=expressed sequence AI120141 /FL=gb:BC006579.1 gb:NM_133810.1
1429823_at	27	151	5.65	Sgcg	Sarcoglycan, gamma (dystrophin-associated glycoprotein)					gb:BB519768 /DB_XREF=gi:9571226 /DB_XREF=BB519768 /CLONE=D830038D16 /FEA=mRNA /CNT=9 /TID=Mm.138623.1 /TIER=Stack /STK=8 /UG=Mm.138623 /LL=74505 /UG_GENE=5430420E18Rik /UG_TITLE=RIKEN cDNA 5430420E18 gene
1459043_at	70	393	5.62	Fntb	Farnesyltransferase, CAAX box, beta					gb:AW122142 /DB_XREF=gi:6097571 /DB_XREF=UI-M-BH2.2-aor-e-03-0-UI.s1 /CLONE=UI-M-BH2.2-aor-e-03-0-UI /FEA=EST /CNT=3 /TID=Mm.151174.1 /TIER=ConsEnd /STK=2 /UG=Mm.151174 /UG_TITLE=ESTs
1449419_at	89	484	5.46	Dock8	Dedicator of cytokinesis 8					gb:NM_028785.1 /DB_XREF=gi:13386351 /GEN=1200017A24Rik /FEA=FLmRNA /CNT=41 /TID=Mm.32546.1 /TIER=FL+Stack /STK=11 /UG=Mm.32546 /LL=74146 /DEF=Mus musculus RIKEN cDNA 1200017A24 gene (1200017A24Rik), mRNA. /PROD=RIKEN cDNA 1200017A24 /FL=gb:NM_028785.1
1457010_at	170	897	5.28	3010001F23Rik	RIKEN cDNA 3010001F23 gene					gb:AW049649 /DB_XREF=gi:5910178 /DB_XREF=UI-M-BH1-and-g-09-0-UI.s1 /CLONE=UI-M-BH1-and-g-09-0-UI /FEA=EST /CNT=6 /TID=Mm.44979.1 /TIER=ConsEnd /STK=6 /UG=Mm.44979 /UG_TITLE=ESTs
1437371_at	90	473	5.27	9930021J17Rik	RIKEN cDNA 9930021J17 gene					gb:BB008528 /DB_XREF=gi:16257098 /DB_XREF=BB008528 /CLONE=4732483E04 /FEA=EST /CNT=30 /TID=Mm.49448.1 /TIER=Stack /STK=19 /UG=Mm.49448 /UG_TITLE=ESTs
1422986_at	182	946	5.2	Esrrb	Estrogen related receptor, beta	1436926_at				gb:NM_011934.1 /DB_XREF=gi:13937382 /GEN=Esrrb /FEA=FLmRNA /CNT=13 /TID=Mm.90048.1 /TIER=FL /STK=0 /UG=Mm.90048 /LL=26380 /DEF=Mus musculus estrogen related receptor, beta (Esrrb), mRNA. /PROD=estrogen related receptor, beta /FL=gb:NM_011934.1
1439936_at	92	471	5.11	BE949265	Transcribed locus					gb:BE949265 /DB_XREF=gi:10527024 /DB_XREF=UI-M-BH3-avf-a-04-0-UI.s1 /CLONE=UI-M-BH3-avf-a-04-0-UI /FEA=EST /CNT=7 /TID=Mm.150542.1 /TIER=ConsEnd /STK=6 /UG=Mm.150542 /UG_TITLE=ESTs
1419268_at	26	132	5.1	Agr2	Anterior gradient 2 (Xenopus laevis)					gb:NM_011783.1 /DB_XREF=gi:6753009 /GEN=Agr2 /FEA=FLmRNA /CNT=59 /TID=Mm.7244.1 /TIER=FL+Stack /STK=11 /UG=Mm.7244 /LL=23795 /DEF=Mus musculus anterior gradient 2 (Xenopus laevis) (Agr2), mRNA. /PROD=anterior gradient 2 (Xenepus laevis) /FL=gb:AF044262.1 gb:NM_011783.1 gb:AB016592.1 gb:BC013334.1
1429413_at	103	521	5.08	Cpm	Carboxypeptidase M	1453009_at				gb:AK017670.1 /DB_XREF=gi:12857026 /FEA=mRNA /CNT=110 /TID=Mm.41748.1 /TIER=Stack /STK=23 /UG=Mm.41748 /LL=70574 /UG_GENE=5730456K23Rik /UG_TITLE=RIKEN cDNA 5730456K23 gene /DEF=Mus musculus 8 days embryo whole body cDNA, RIKEN full-length enriched library, clone:5730456K23:homolog to CARBOXYPEPTIDASE M PRECURSOR (EC 3.4.17.12), full insert sequence.
1450197_at	194	972	5	Rpe65	Retinal pigment epithelium 65					gb:NM_029987.1 /DB_XREF=gi:19920337 /GEN=Rpe65 /FEA=FLmRNA /CNT=8 /TID=Mm.131708.1 /TIER=FL /STK=2 /UG=Mm.131708 /LL=19892 /DEF=Mus musculus retinal pigment epithelium, 65 kDa (Rpe65), mRNA. /PROD=retinal pigment epithelium, 65 kDa /FL=gb:NM_029987.1 gb:AF410461.1
Crx-upregulated genes
Affy_ID	Crx_ave	129_ave	129_ave/Crx_ave	Gene symbol	Gene name	Additional Affy_IDs		Additional gene information
1426225_at	5259	150	0.03	Rbp4	Retinol binding protein 4, plasma			gb:U63146.1 /DB_XREF=gi:1515449 /GEN=RBP /FEA=FLmRNA /CNT=137 /TID=Mm.2605.1 /TIER=FL+Stack /STK=45 /UG=Mm.2605 /LL=19662 /DEF=Mus musculus retinol binding protein (RBP) mRNA, complete cds. /PROD=retinol binding protein /FL=gb:U63146.1
1450779_at	6229	261	0.04	Fabp7	Fatty acid binding protein 7, brain			gb:NM_021272.1 /DB_XREF=gi:10946571 /GEN=Fabp7 /FEA=FLmRNA /CNT=58 /TID=Mm.3644.1 /TIER=FL+Stack /STK=9 /UG=Mm.3644 /LL=12140 /DEF=Mus musculus fatty acid binding protein 7, brain (Fabp7), mRNA. /PROD=brain lipid binding protein /FL=gb:NM_021272.1
1417065_at	7420	1557	0.21	Egr1	Early growth response 1			gb:NM_007913.1 /DB_XREF=gi:6681284 /GEN=Egr1 /FEA=FLmRNA /CNT=130 /TID=Mm.181959.1 /TIER=FL+Stack /STK=58 /UG=Mm.181959 /LL=13653 /DEF=Mus musculus early growth response 1 (Egr1), mRNA. /PROD=early growth response 1 /FL=gb:M20157.1 gb:M22326.1 gb:NM_007913.1
1450623_at	8402	2752	0.33	Gnb2	Guanine nucleotide binding protein, beta 2			gb:NM_010312.1 /DB_XREF=gi:13937390 /GEN=Gnb2 /FEA=FLmRNA /CNT=367 /TID=Mm.30141.1 /TIER=FL+Stack /STK=141 /UG=Mm.30141 /LL=14693 /DEF=Mus musculus guanine nucleotide binding protein, beta 2 (Gnb2), mRNA. /PROD=guanine nucleotide-binding protein, beta-2subunit /FL=gb:U34960.1 gb:NM_010312.1
1455782_at	5494	1832	0.33	Samd7	Sterile alpha motif domain containing 7			gb:BE984591 /DB_XREF=gi:10656970 /DB_XREF=UI-M-CG0p-bdf-c-12-0-UI.s1 /CLONE=UI-M-CG0p-bdf-c-12-0-UI /FEA=EST /CNT=9 /TID=Mm.138316.1 /TIER=Stack /STK=8 /UG=Mm.138316 /UG_TITLE=ESTs
1450080_at	8043	2747	0.34	Cxx1c	CAAX box 1 homolog C (human)			gb:NM_028375.1 /DB_XREF=gi:13386305 /GEN=2900027G03Rik /FEA=FLmRNA /CNT=29 /TID=Mm.158897.1 /TIER=FL /STK=2 /UG=Mm.158897 /LL=72865 /DEF=Mus musculus RIKEN cDNA 2900027G03 gene (2900027G03Rik), mRNA. /PROD=RIKEN cDNA 2900027G03 /FL=gb:NM_028375.1
1440975_at	9381	3368	0.36	1810057P16Rik	RIKEN cDNA 1810057P16 gene	1447509_at		gb:BB275943 /DB_XREF=gi:16400865 /DB_XREF=BB275943 /CLONE=A830095F23 /FEA=EST /CNT=9 /TID=Mm.44857.1 /TIER=ConsEnd /STK=4 /UG=Mm.44857 /UG_TITLE=ESTs
1416776_at	5721	2128	0.37	Crym	Crystallin, mu			gb:NM_016669.1 /DB_XREF=gi:7710011 /GEN=Crym /FEA=FLmRNA /CNT=91 /TID=Mm.9114.1 /TIER=FL+Stack /STK=70 /UG=Mm.9114 /LL=12971 /DEF=Mus musculus crystallin, mu (Crym), mRNA. /PROD=crystallin, mu /FL=gb:NM_016669.1 gb:AF039391.1
1416021_a_at	8212	3441	0.42	Fabp5	Fatty acid binding protein 5, epidermal			gb:BC002008.1 /DB_XREF=gi:12805102 /FEA=FLmRNA /CNT=262 /TID=Mm.741.1 /TIER=FL+Stack /STK=143 /UG=Mm.741 /LL=16592 /UG_GENE=Fabp5 /DEF=Mus musculus, fatty acid binding protein 5, epidermal, clone MGC:5786 IMAGE:3490535, mRNA, complete cds. /PROD=fatty acid binding protein 5, epidermal /FL=gb:NM_010634.1 gb:BC002008.1
1422557_s_at	6398	2716	0.42	Mt1	Metallothionein 1			gb:NM_013602.1 /DB_XREF=gi:7305284 /GEN=Mt1 /FEA=FLmRNA /CNT=145 /TID=Mm.219629.1 /TIER=FL+Stack /STK=36 /UG=Mm.219629 /LL=17748 /DEF=Mus musculus metallothionein 1 (Mt1), mRNA. /PROD=metallothionein 1 /FL=gb:NM_013602.1
1448468_a_at	5066	2151	0.42	Kcnab1	Potassium voltage-gated channel, shaker-related subfamily, beta member 1			gb:BC014701.1 /DB_XREF=gi:15928439 /FEA=FLmRNA /CNT=85 /TID=Mm.1438.1 /TIER=FL+Stack /STK=69 /UG=Mm.1438 /LL=16497 /UG_GENE=Kcnab1 /DEF=Mus musculus, potassium voltage gated channel, shaker related subfamily, beta member 1, clone MGC:25284 IMAGE:4482268, mRNA, complete cds. /PROD=potassium voltage gated channel, shaker relatedsubfamily, beta member 1 /FL=gb:BC014701.1 gb:AF033003.1 gb:U65591.1 gb…
1451620_at	6334	2905	0.46	C1ql3	C1q-like 3			gb:BB768838 /DB_XREF=gi:16211380 /DB_XREF=BB768838 /CLONE=G370089M02 /FEA=FLmRNA /CNT=96 /TID=Mm.81159.1 /TIER=Stack /STK=15 /UG=Mm.81159 /LL=68921 /UG_GENE=1110065A22Rik /UG_TITLE=RIKEN cDNA 1110065A22 gene /FL=gb:BC024634.1 gb:AB044560.1
1416768_at	5490	2507	0.46	1110003E01Rik	RIKEN cDNA 1110003E01 gene			gb:NM_133697.1 /DB_XREF=gi:19526867 /GEN=1110003E01Rik /FEA=FLmRNA /CNT=162 /TID=Mm.27647.1 /TIER=FL+Stack /STK=70 /UG=Mm.27647 /LL=68552 /DEF=Mus musculus RIKEN cDNA 1110003E01 gene (1110003E01Rik), mRNA. /PROD=RIKEN cDNA 1700127H04 /FL=gb:BC009097.1 gb:NM_133697.1
1449507_a_at	5675	2679	0.47	Cd47	CD47 antigen (Rh-related antigen, integrin-associated signal transducer)			gb:NM_010581.1 /DB_XREF=gi:6754381 /GEN=Itgp /FEA=FLmRNA /CNT=83 /TID=Mm.167842.1 /TIER=FL+Stack /STK=8 /UG=Mm.167842 /LL=16423 /DEF=Mus musculus integrin-associated protein (Itgp), mRNA. /PROD=integrin-associated protein /FL=gb:AB012693.1 gb:NM_010581.1 gb:BC012667.1
1449159_at	13273	6396	0.48	Gnb3	Guanine nucleotide binding protein, beta 3			gb:NM_013530.1 /DB_XREF=gi:20502975 /GEN=Gnb3 /FEA=FLmRNA /CNT=28 /TID=Mm.68889.1 /TIER=FL+Stack /STK=21 /UG=Mm.68889 /LL=14695 /DEF=Mus musculus guanine nucleotide binding protein, beta 3 (Gnb3), mRNA. /PROD=guanine nucleotide-binding protein, beta-3subunit /FL=gb:BC018239.1 gb:NM_013530.1
1425926_a_at	9484	4535	0.48	Otx2	Orthodenticle homolog 2 (Drosophila)			gb:BC017609.1 /DB_XREF=gi:17160873 /FEA=FLmRNA /CNT=2 /TID=Mm.134516.1 /TIER=FL /STK=1 /UG=Mm.134516 /DEF=Mus musculus, clone MGC:27657 IMAGE:4527414, mRNA, complete cds. /PROD=Unknown (protein for MGC:27657) /FL=gb:BC017609.1
1425784_a_at	7006	3443	0.49	Olfm1	Olfactomedin 1			gb:D78264.1 /DB_XREF=gi:3218527 /FEA=FLmRNA /CNT=5 /TID=Mm.43278.2 /TIER=FL /STK=1 /UG=Mm.43278 /LL=56177 /UG_GENE=Olfm1 /DEF=Mus musculus mRNA for pancortin-3, complete cds. /PROD=pancortin-3 /FL=gb:AF028740.1 gb:D78264.1
1416250_at	5768	2854	0.49	Btg2	B-cell translocation gene 2, anti-proliferative			gb:BG965405 /DB_XREF=gi:14353042 /DB_XREF=602830441F1 /CLONE=IMAGE:4984979 /FEA=FLmRNA /CNT=229 /TID=Mm.903.1 /TIER=Stack /STK=23 /UG=Mm.903 /LL=12227 /UG_GENE=Btg2 /UG_TITLE=B-cell translocation gene 2, anti-proliferative /FL=gb:NM_007570.1
1430110_at	1340	3	0	AK018698	Transcribed locus			gb:AK018698.1 /DB_XREF=gi:12858535 /FEA=mRNA /CNT=5 /TID=Mm.136985.1 /TIER=ConsEnd /STK=4 /UG=Mm.136985 /LL=76743 /UG_GENE=D230044M03Rik /UG_TITLE=RIKEN cDNA D230044M03 gene /DEF=Mus musculus 12 days embryo eyeball cDNA, RIKEN full-length enriched library, clone:D230044M03:related to GAP JUNCTION ALPHA-7 PROTEIN (CONNEXIN 43.4) (CX43.4), full insert sequence.
1436557_at	1479	40	0.03	BC067067	CDNA sequence BC067067			gb:BM936589 /DB_XREF=gi:19395741 /DB_XREF=UI-M-CG0p-bqi-h-04-0-UI.r1 /CLONE=UI-M-CG0p-bqi-h-04-0-UI /FEA=EST /CNT=16 /TID=Mm.38266.1 /TIER=Stack /STK=8 /UG=Mm.38266 /UG_TITLE=ESTs, Weakly similar to keratin complex 2, gene 6g (Mus musculus) (M.musculus)
1418571_at	1337	48	0.04	Tnfrsf12a	Tumor necrosis factor receptor superfamily, member 12a	1418572_x_at		gb:NM_013749.1 /DB_XREF=gi:7305058 /GEN=Fn14-pending /FEA=FLmRNA /CNT=79 /TID=Mm.28518.1 /TIER=FL+Stack /STK=21 /UG=Mm.28518 /LL=27279 /DEF=Mus musculus type I transmembrane protein Fn14 (Fn14-pending), mRNA. /PROD=type I transmembrane protein Fn14 /FL=gb:AF156164.1 gb:BC025860.1 gb:NM_013749.1
1419632_at	1329	54	0.04	Tecta	Tectorin alpha			gb:NM_009347.1 /DB_XREF=gi:6678276 /GEN=Tecta /FEA=FLmRNA /CNT=8 /TID=Mm.42209.1 /TIER=FL+Stack /STK=8 /UG=Mm.42209 /LL=21683 /DEF=Mus musculus tectorin alpha (Tecta), mRNA. /PROD=tectorin alpha /FL=gb:NM_009347.1
1441809_at	1956	116	0.06	A930009A15Rik	RIKEN cDNA A930009A15 gene			gb:BB805891 /DB_XREF=gi:16978520 /DB_XREF=BB805891 /CLONE=G630071N19 /FEA=EST /CNT=4 /TID=Mm.146654.1 /TIER=ConsEnd /STK=4 /UG=Mm.146654 /UG_TITLE=ESTs
1440257_at	1472	94	0.06	Obox6	Oocyte specific homeobox 6			gb:BG069935 /DB_XREF=gi:12552592 /DB_XREF=H3082G07-3 /CLONE=H3082G07 /FEA=EST /CNT=13 /TID=Mm.25863.1 /TIER=ConsEnd /STK=5 /UG=Mm.25863 /LL=52031 /UG_GENE=D17Ertd599e /UG_TITLE=DNA segment, Chr 17, ERATO Doi 599, expressed
1453398_at	3124	209	0.07	A930009A15Rik	RIKEN cDNA A930009A15 gene			gb:AK020834.1 /DB_XREF=gi:12861538 /FEA=mRNA /CNT=6 /TID=Mm.132267.1 /TIER=ConsEnd /STK=4 /UG=Mm.132267 /LL=77798 /UG_GENE=A930009A15Rik /UG_TITLE=RIKEN cDNA A930009A15 gene /DEF=Mus musculus adult retina cDNA, RIKEN full-length enriched library, clone:A930009A15:unclassifiable, full insert sequence.
1415935_at	1184	88	0.07	Smoc2	SPARC related modular calcium binding 2	1431362_a_at		gb:NM_022315.1 /DB_XREF=gi:11612492 /GEN=Smoc2 /FEA=FLmRNA /CNT=227 /TID=Mm.30162.1 /TIER=FL+Stack /STK=165 /UG=Mm.30162 /LL=64074 /DEF=Mus musculus secreted modular calcium binding protein 2 (Smoc2), mRNA. /PROD=secreted modular calcium-binding protein 2 /FL=gb:BC019527.1 gb:NM_022315.1
1431008_at	1597	134	0.08	H2-K1	Histocompatibility 2, K1, K region			gb:BG916808 /DB_XREF=gi:14297284 /DB_XREF=602816063F1 /CLONE=IMAGE:4935351 /FEA=mRNA /CNT=24 /TID=Mm.56926.2 /TIER=ConsEnd /STK=0 /UG=Mm.56926 /LL=68395 /UG_GENE=0610037M15Rik /UG_TITLE=RIKEN cDNA 0610037M15 gene
1417889_at	1315	161	0.12	Apobec2	Apolipoprotein B editing complex 2			gb:NM_009694.1 /DB_XREF=gi:6753097 /GEN=Apobec2 /FEA=FLmRNA /CNT=73 /TID=Mm.27822.1 /TIER=FL+Stack /STK=34 /UG=Mm.27822 /LL=11811 /DEF=Mus musculus apolipoprotein B editing complex 2 (Apobec2), mRNA. /PROD=apolipoprotein B editing complex 2 /FL=gb:NM_009694.1 gb:AF161699.1
1451499_at	2275	329	0.14	Cadps2	Ca2+-dependent activator protein for secretion 2			gb:AF000969.2 /DB_XREF=gi:15795230 /GEN=Cpd2 /FEA=FLmRNA /CNT=41 /TID=Mm.41732.1 /TIER=FL+Stack /STK=14 /UG=Mm.41732 /DEF=Mus musculus cerebellum postnatal development associated protein 2 (Cpd2) mRNA, complete cds. /PROD=cerebellum postnatal development associatedprotein 2 /FL=gb:AF000969.2
1418782_at	1325	204	0.15	Rxrg	Retinoid X receptor gamma			gb:NM_009107.1 /DB_XREF=gi:6677828 /GEN=Rxrg /FEA=FLmRNA /CNT=34 /TID=Mm.3475.1 /TIER=FL+Stack /STK=18 /UG=Mm.3475 /LL=20183 /DEF=Mus musculus retinoid X receptor gamma (Rxrg), mRNA. /PROD=retinoid X receptor gamma /FL=gb:M84819.1 gb:NM_009107.1
1416625_at	1180	204	0.17	Serping1	Serine (or cysteine) peptidase inhibitor, clade G, member 1			gb:NM_009776.1 /DB_XREF=gi:6753217 /GEN=Serping1 /FEA=FLmRNA /CNT=192 /TID=Mm.38888.1 /TIER=FL+Stack /STK=77 /UG=Mm.38888 /LL=12258 /DEF=Mus musculus serine (or cysteine) proteinase inhibitor, clade G (C1 inhibitor), member 1 (Serping1), mRNA. /PROD=complement component 1 inhibitor /FL=gb:AF010254.1 gb:BC002026.1 gb:NM_009776.1
1451297_at	3535	640	0.18	Gulo	Gulonolactone (L-) oxidase			gb:BC019856.1 /DB_XREF=gi:18044344 /FEA=FLmRNA /CNT=95 /TID=Mm.26207.1 /TIER=FL+Stack /STK=40 /UG=Mm.26207 /DEF=Mus musculus, clone MGC:29968 IMAGE:5123684, mRNA, complete cds. /PROD=Unknown (protein for MGC:29968) /FL=gb:BC019856.1
1426508_at	2275	419	0.18	Gfap	Glial fibrillary acidic protein	1440142_s_at	1426509_s_at	gb:BB183081 /DB_XREF=gi:16270193 /DB_XREF=BB183081 /CLONE=A230103O17 /FEA=FLmRNA /CNT=19 /TID=Mm.1239.1 /TIER=Stack /STK=8 /UG=Mm.1239 /LL=14580 /UG_GENE=Gfap /UG_TITLE=glial fibrillary acidic protein /FL=gb:AF332061.1 gb:AF332062.1
1426858_at	1197	212	0.18	Inhbb	Inhibin beta-B			gb:BB353211 /DB_XREF=gi:16405526 /DB_XREF=BB353211 /CLONE=B930092O10 /FEA=mRNA /CNT=106 /TID=Mm.3092.1 /TIER=Stack /STK=48 /UG=Mm.3092 /LL=16324 /UG_GENE=Inhbb /UG_TITLE=inhibin beta-B
1454770_at	1969	366	0.19	Cckbr	Cholecystokinin B receptor	1460663_at		gb:AV221910 /DB_XREF=gi:15404818 /DB_XREF=AV221910 /CLONE=3632432P12 /FEA=EST /CNT=52 /TID=Mm.44513.2 /TIER=Stack /STK=52 /UG=Mm.44513 /LL=12426 /UG_GENE=Cckbr /UG_TITLE=cholecystokinin B receptor
1456797_at	1431	265	0.19	Cltb	Clathrin, light polypeptide (Lcb)	1460740_at	1453063_at	gb:BB312119 /DB_XREF=gi:16402762 /DB_XREF=BB312119 /CLONE=B230331K14 /FEA=EST /CNT=9 /TID=Mm.192894.1 /TIER=ConsEnd /STK=7 /UG=Mm.192894 /UG_TITLE=ESTs
1429440_at	2581	511	0.2	1810041L15Rik	RIKEN cDNA 1810041L15 gene	1455515_at		gb:BI734299 /DB_XREF=gi:15711312 /DB_XREF=603351218F1 /CLONE=IMAGE:5358653 /FEA=mRNA /CNT=41 /TID=Mm.22913.1 /TIER=Stack /STK=22 /UG=Mm.22913 /LL=72301 /UG_GENE=1810041L15Rik /UG_TITLE=RIKEN cDNA 1810041L15 gene
1423233_at	2149	432	0.2	Cebpd	CCAAT/enhancer binding protein (C/EBP), delta			gb:BB831146 /DB_XREF=gi:17009389 /DB_XREF=BB831146 /CLONE=G930015F03 /FEA=FLmRNA /CNT=34 /TID=Mm.4639.1 /TIER=Stack /STK=25 /UG=Mm.4639 /LL=12609 /UG_GENE=Cebpd /UG_TITLE=CCAATenhancer binding protein (CEBP), delta /FL=gb:NM_007679.1
1419100_at	2215	475	0.21	Serpina3n	Serine (or cysteine) peptidase inhibitor, clade A, member 3N			gb:NM_009252.1 /DB_XREF=gi:6678092 /GEN=Spi2-2 /FEA=FLmRNA /CNT=61 /TID=Mm.22650.1 /TIER=FL+Stack /STK=13 /UG=Mm.22650 /LL=20716 /DEF=Mus musculus serine protease inhibitor 2-2 (Spi2-2), mRNA. /PROD=serine protease inhibitor 2-2 /FL=gb:NM_009252.1 gb:M64086.1 gb:BC013651.1
1438081_at	1881	400	0.21	Mcc	Mutated in colorectal cancers			gb:BB794635 /DB_XREF=gi:16964254 /DB_XREF=BB794635 /CLONE=G431001D24 /FEA=EST /CNT=15 /TID=Mm.210479.1 /TIER=Stack /STK=12 /UG=Mm.210479 /UG_TITLE=ESTs
1418021_at	1052	230	0.22	C4b	Complement component 4B (Childo blood group)			gb:NM_009780.1 /DB_XREF=gi:6753225 /GEN=C4 /FEA=FLmRNA /CNT=175 /TID=Mm.16106.1 /TIER=FL+Stack /STK=31 /UG=Mm.16106 /LL=12268 /DEF=Mus musculus complement component 4 (within H-2S) (C4), mRNA. /PROD=complement component 4 (within H-2S) /FL=gb:M21576.1 gb:M12384.1 gb:M11729.1 gb:NM_009780.1
1417930_at	1258	292	0.23	Nab2	Ngfi-A binding protein 2			gb:NM_008668.1 /DB_XREF=gi:6679003 /GEN=Nab2 /FEA=FLmRNA /CNT=53 /TID=Mm.6549.1 /TIER=FL+Stack /STK=33 /UG=Mm.6549 /LL=17937 /DEF=Mus musculus Ngfi-A binding protein 2 (Nab2), mRNA. /PROD=Ngfi-A binding protein 2 /FL=gb:U47543.1 gb:NM_008668.1
1447849_s_at	2097	512	0.24	AV323441	Transcribed locus			gb:AV323441 /DB_XREF=gi:6293358 /DB_XREF=AV323441 /CLONE=6230409N17 /FEA=EST /CNT=2 /TID=Mm.180082.1 /TIER=ConsEnd /STK=2 /UG=Mm.180082 /UG_TITLE=ESTs
1420008_s_at	1069	257	0.24	Wwc1	WW, C2 and coiled-coil domain containing 1	1427261_at		gb:AU017197 /DB_XREF=gi:3372310 /DB_XREF=AU017197 /CLONE=J0735G03 /FEA=EST /CNT=1 /TID=Mm.203700.1 /TIER=ConsEnd /STK=1 /UG=Mm.203700 /LL=104476 /UG_GENE=AU017197 /UG_TITLE=expressed sequence AU017197
1423503_at	2359	598	0.25	Jam3	Junction adhesion molecule 3			gb:AK013156.1 /DB_XREF=gi:12850342 /GEN=Jcam2 /FEA=FLmRNA /CNT=157 /TID=Mm.28770.1 /TIER=Stack /STK=14 /UG=Mm.28770 /LL=83964 /UG_TITLE=junction cell adhesion molecule 3 /DEF=Mus musculus 10, 11 days embryo whole body cDNA, RIKEN full-length enriched library, clone:2810425J03:junction cell adhesion molecule 2, full insert sequence. /FL=gb:NM_023277.1 gb:BC024357.1
1420852_a_at	1256	314	0.25	B3gnt2	UDP-GlcNAc:betaGal beta-1,3-N-acetylglucosaminyltransferase 2	1450026_a_at		gb:NM_016888.2 /DB_XREF=gi:9938023 /GEN=B3gnt1 /FEA=FLmRNA /CNT=124 /TID=Mm.21503.1 /TIER=FL /STK=2 /UG=Mm.21503 /LL=53625 /DEF=Mus musculus UDP-GlcNAc:betaGal beta-1,3-N-acetylglucosaminyltransferase 1 (B3gnt1), mRNA. /PROD=UDP-GlcNAc:betaGalbeta-1,3-N-acetylglucosaminyltransferase 1 /FL=gb:NM_016888.2 gb:AF092050.2 gb:AY043479.1
1431829_a_at	1126	281	0.25	Rgl3	Ral guanine nucleotide dissociation stimulator-like 3			gb:AK004876.1 /DB_XREF=gi:12836389 /FEA=mRNA /CNT=1 /TID=Mm.110594.2 /TIER=ConsEnd /STK=0 /UG=Mm.110594 /LL=71746 /UG_GENE=1300003D20Rik /UG_TITLE=RIKEN cDNA 1300003D20 gene /DEF=Mus musculus adult male liver cDNA, RIKEN full-length enriched library, clone:1300003D20:RALGDS-LIKE PROTEIN 3, full insert sequence.
1453199_at	2332	633	0.27	Acbd6	Acyl-Coenzyme A binding domain containing 6			gb:AK011781.1 /DB_XREF=gi:12848121 /FEA=mRNA /CNT=43 /TID=Mm.22537.2 /TIER=Stack /STK=14 /UG=Mm.22537 /LL=72482 /UG_GENE=2610100E10Rik /UG_TITLE=RIKEN cDNA 2610100E10 gene /DEF=Mus musculus 10 days embryo whole body cDNA, RIKEN full-length enriched library, clone:2610100E10:related to ACYL-COA BINDING PROTEIN, full insert sequence.
1453055_at	2088	562	0.27	Sema6d	Sema domain, transmembrane domain (TM), and cytoplasmic domain, (semaphorin) 6D			gb:BB462688 /DB_XREF=gi:16426803 /DB_XREF=BB462688 /CLONE=D130077F24 /FEA=mRNA /CNT=25 /TID=Mm.81161.1 /TIER=Stack /STK=10 /UG=Mm.81161 /LL=68848 /UG_GENE=1110067B02Rik /UG_TITLE=RIKEN cDNA 1110067B02 gene
1419835_s_at	1957	555	0.28	Plec1	Plectin 1	1434610_at		gb:AW123286 /DB_XREF=gi:6098816 /DB_XREF=UI-M-BH2.1-apg-g-06-0-UI.s1 /CLONE=UI-M-BH2.1-apg-g-06-0-UI /FEA=EST /CNT=1 /TID=Mm.215172.1 /TIER=ConsEnd /STK=1 /UG=Mm.215172 /LL=18810 /UG_GENE=Plec1 /UG_TITLE=plectin 1
1434719_at	1475	410	0.28	A2m	Alpha-2-macroglobulin			gb:BB185854 /DB_XREF=gi:15409465 /DB_XREF=BB185854 /CLONE=A330029I17 /FEA=EST /CNT=32 /TID=Mm.30151.1 /TIER=Stack /STK=26 /UG=Mm.30151 /UG_TITLE=ESTs, Moderately similar to A2M2 MOUSE MURINOGLOBULIN 2 PRECURSOR (M.musculus)
1435819_at	1323	375	0.28	4922503N01Rik	RIKEN cDNA 4922503N01 gene			gb:BB833422 /DB_XREF=gi:17011665 /DB_XREF=BB833422 /CLONE=G930026F05 /FEA=EST /CNT=15 /TID=Mm.99958.1 /TIER=Stack /STK=13 /UG=Mm.99958 /UG_TITLE=ESTs
1416097_at	1199	340	0.28	Lrrc4	Leucine rich repeat containing 4			gb:NM_138682.1 /DB_XREF=gi:20373168 /GEN=MBAG1 /FEA=FLmRNA /CNT=136 /TID=Mm.40158.1 /TIER=FL+Stack /STK=128 /UG=Mm.40158 /LL=192198 /DEF=Mus musculus LIBG-like protein (MBAG1), mRNA. /PROD=LIBG-like protein /FL=gb:AF300458.1 gb:NM_138682.1
1423909_at	1377	416	0.3	0610011I04Rik	RIKEN cDNA 0610011I04 gene			gb:BC010831.1 /DB_XREF=gi:14789943 /FEA=FLmRNA /CNT=175 /TID=Mm.27061.1 /TIER=FL+Stack /STK=81 /UG=Mm.27061 /LL=66058 /UG_GENE=0610011I04Rik /DEF=Mus musculus, RIKEN cDNA 0610011I04 gene, clone MGC:19158 IMAGE:4221626, mRNA, complete cds. /PROD=RIKEN cDNA 0610011I04 gene /FL=gb:BC010831.1
1448942_at	1241	375	0.3	Gng11	Guanine nucleotide binding protein (G protein), gamma 11			gb:NM_025331.1 /DB_XREF=gi:13384697 /GEN=0610037B21Rik /FEA=FLmRNA /CNT=60 /TID=Mm.25547.1 /TIER=FL+Stack /STK=30 /UG=Mm.25547 /LL=66066 /DEF=Mus musculus RIKEN cDNA 0610037B21 gene (0610037B21Rik), mRNA. /PROD=RIKEN cDNA 0610037B21 /FL=gb:NM_025331.1
1428942_at	4308	1354	0.31	Mt2	Metallothionein 2			gb:AA796766 /DB_XREF=gi:2859721 /DB_XREF=vp27c11.r1 /CLONE=IMAGE:1077908 /FEA=mRNA /CNT=34 /TID=Mm.142740.1 /TIER=Stack /STK=16 /UG=Mm.142740 /LL=17750 /UG_GENE=Mt2 /UG_TITLE=metallothionein 2
1437091_at	1780	566	0.32	Accn4	Amiloride-sensitive cation channel 4, pituitary			gb:AV323885 /DB_XREF=gi:15406242 /DB_XREF=AV323885 /CLONE=6230414D01 /FEA=EST /CNT=27 /TID=Mm.110790.1 /TIER=Stack /STK=26 /UG=Mm.110790 /UG_TITLE=ESTs, Weakly similar to JE0091 testis sodium channel 1 (H.sapiens)
1416125_at	1685	562	0.33	Fkbp5	FK506 binding protein 5			gb:BC015260.1 /DB_XREF=gi:15929656 /FEA=FLmRNA /CNT=212 /TID=Mm.154390.1 /TIER=FL+Stack /STK=124 /UG=Mm.154390 /LL=14229 /UG_GENE=Fkbp5 /DEF=Mus musculus, FK506 binding protein 5 (51 kDa), clone MGC:18417 IMAGE:4237766, mRNA, complete cds. /PROD=FK506 binding protein 5 (51 kDa) /FL=gb:BC015260.1 gb:U36220.1 gb:NM_010220.1 gb:U16959.1
1419091_a_at	1582	515	0.33	Anxa2	Annexin A2			gb:NM_007585.1 /DB_XREF=gi:6996912 /GEN=Anxa2 /FEA=FLmRNA /CNT=99 /TID=Mm.584.1 /TIER=FL+Stack /STK=13 /UG=Mm.584 /LL=12306 /DEF=Mus musculus annexin A2 (Anxa2), mRNA. /PROD=calpactin I heavy chain /FL=gb:BC003327.1 gb:M14044.1 gb:NM_007585.1 gb:BC005763.1 gb:D10024.1
1427705_a_at	1402	465	0.33	Nfkb1	Nuclear factor of kappa light chain gene enhancer in B-cells 1, p105			gb:L28118.1 /DB_XREF=gi:468361 /FEA=mRNA /CNT=1 /TID=Mm.3420.3 /TIER=ConsEnd /STK=0 /UG=Mm.3420 /LL=18033 /UG_GENE=Nfkb1 /UG_TITLE=nuclear factor of kappa light chain gene enhancer in B-cells 1, p105 /DEF=Mouse NF-kappa-B (p105) mRNA.
1440898_at	261	9	0.03	4632412N22Rik	RIKEN cDNA 4632412N22 gene			gb:BB474395 /DB_XREF=gi:16439852 /DB_XREF=BB474395 /CLONE=D330006F14 /FEA=EST /CNT=8 /TID=Mm.187372.1 /TIER=ConsEnd /STK=4 /UG=Mm.187372 /UG_TITLE=ESTs, Weakly similar to T00057 hypothetical protein KIAA0423 (H.sapiens)
1437781_at	547	25	0.05	BB180869	Transcribed locus			gb:BB180869 /DB_XREF=gi:16270031 /DB_XREF=BB180869 /CLONE=A230087K08 /FEA=EST /CNT=16 /TID=Mm.114886.1 /TIER=Stack /STK=14 /UG=Mm.114886 /UG_TITLE=ESTs
1449609_at	402	25	0.06	AA189214	Transcribed locus			gb:AA189214 /DB_XREF=gi:1776815 /DB_XREF=mu50b07.r1 /CLONE=IMAGE:642805 /FEA=EST /CNT=3 /TID=Mm.24066.1 /TIER=ConsEnd /STK=1 /UG=Mm.24066 /UG_TITLE=ESTs
1451644_a_at	318	23	0.07	H2-K1	Histocompatibility 2, K1, K region			gb:BC010602.1 /DB_XREF=gi:14714892 /FEA=FLmRNA /CNT=18 /TID=Mm.56926.1 /TIER=FL /STK=3 /UG=Mm.56926 /LL=68395 /UG_GENE=0610037M15Rik /DEF=Mus musculus, Similar to histocompatibility 2, Q region locus 7, clone MGC:6571 IMAGE:3257482, mRNA, complete cds. /PROD=Similar to histocompatibility 2, Q region locus7 /FL=gb:BC010602.1
1422269_at	222	15	0.07	Insm2	Insulinoma-associated 2			gb:NM_020287.1 /DB_XREF=gi:9938005 /GEN=Insm2-pending /FEA=FLmRNA /CNT=2 /TID=Mm.103710.1 /TIER=FL /STK=1 /UG=Mm.103710 /LL=56856 /DEF=Mus musculus insulinoma-associated 2 (Insm2-pending), mRNA. /PROD=insulinoma-associated 2 /FL=gb:NM_020287.1
1416431_at	390	32	0.08	Tubb6	Tubulin, beta 6			gb:NM_026473.1 /DB_XREF=gi:13385963 /GEN=2310057H16Rik /FEA=FLmRNA /CNT=173 /TID=Mm.181860.1 /TIER=FL+Stack /STK=90 /UG=Mm.181860 /LL=67951 /DEF=Mus musculus RIKEN cDNA 2310057H16 gene (2310057H16Rik), mRNA. /PROD=RIKEN cDNA 2310057H16 /FL=gb:NM_026473.1 gb:BC008225.1
1436365_at	189	17	0.09	Zbtb7c	Zinc finger and BTB domain containing 7C			gb:BG922355 /DB_XREF=gi:14302831 /DB_XREF=602820263F1 /CLONE=IMAGE:4949198 /FEA=EST /CNT=27 /TID=Mm.186279.1 /TIER=Stack /STK=9 /UG=Mm.186279 /UG_TITLE=ESTs
1443078_at	177	16	0.09	AV321994	Transcribed locus			gb:AV321994 /DB_XREF=gi:16395142 /DB_XREF=AV321994 /CLONE=6030439D06 /FEA=EST /CNT=3 /TID=Mm.212342.1 /TIER=ConsEnd /STK=3 /UG=Mm.212342 /UG_TITLE=ESTs
1425220_x_at	192	21	0.11	AF067061	CDNA sequence AF067061			gb:AF067062.1 /DB_XREF=gi:3171141 /GEN=variable group of 2-cell-stage gene family /FEA=FLmRNA /CNT=10 /TID=Mm.14614.1 /TIER=FL /STK=4 /UG=Mm.14614 /DEF=Mus musculus clone L4 variable group of 2-cell-stage gene family mRNA, complete cds. /PROD=unknown /FL=gb:AF067062.1 gb:AF067061.1
1425808_a_at	191	21	0.11	Myocd	Myocardin	1425978_at		gb:AF437877.1 /DB_XREF=gi:16904810 /GEN=BSAC2A /FEA=FLmRNA /CNT=6 /TID=Mm.32257.1 /TIER=FL /STK=1 /UG=Mm.32257 /DEF=Mus musculus myocardin A (BSAC2A) mRNA, complete cds, alternatively spliced. /PROD=myocardin A /FL=gb:AF437877.1
1452707_at	757	94	0.12	4631423F02Rik	RIKEN cDNA 4631423F02 gene			gb:AK014532.1 /DB_XREF=gi:12852447 /FEA=mRNA /CNT=85 /TID=Mm.68617.1 /TIER=Stack /STK=67 /UG=Mm.68617 /LL=70788 /UG_GENE=4631423F02Rik /UG_TITLE=RIKEN cDNA 4631423F02 gene /DEF=Mus musculus 0 day neonate skin cDNA, RIKEN full-length enriched library, clone:4631423F02:Kelch motif containing protein, full insert sequence.
1434774_at	149	17	0.12	Rhbdf2	Rhomboid 5 homolog 2 (Drosophila)			gb:BB005249 /DB_XREF=gi:16195154 /DB_XREF=BB005249 /CLONE=4732465I17 /FEA=EST /CNT=54 /TID=Mm.89695.1 /TIER=Stack /STK=25 /UG=Mm.89695 /UG_TITLE=ESTs, Moderately similar to I49469 epidermal growth factor receptor-related protein - mouse (M.musculus)
1460197_a_at	182	24	0.13	Steap4	STEAP family member 4			gb:NM_054098.1 /DB_XREF=gi:16905132 /GEN=Tiarp-pending /FEA=FLmRNA /CNT=68 /TID=Mm.31403.1 /TIER=FL+Stack /STK=60 /UG=Mm.31403 /LL=117167 /DEF=Mus musculus Tnfa-induced adipose-related protein (Tiarp-pending), mRNA. /PROD=Tnfa-induced adipose-related protein /FL=gb:NM_054098.1
1418133_at	108	14	0.13	Bcl3	B-cell leukemia/lymphoma 3			gb:NM_033601.1 /DB_XREF=gi:15809013 /GEN=Bcl3 /FEA=FLmRNA /CNT=51 /TID=Mm.1068.1 /TIER=FL+Stack /STK=29 /UG=Mm.1068 /LL=12051 /DEF=Mus musculus B-cell leukemialymphoma 3 (Bcl3), mRNA. /PROD=B-cell leukemialymphoma 3 /FL=gb:NM_033601.1 gb:AF067774.1
1420039_s_at	104	14	0.14	Cbx7	Chromobox homolog 7			gb:C85667 /DB_XREF=gi:2917624 /DB_XREF=C85667 /CLONE=J0212G11 /FEA=EST /CNT=1 /TID=Mm.215184.1 /TIER=ConsEnd /STK=1 /UG=Mm.215184 /LL=52609 /UG_GENE=D15Ertd417e /UG_TITLE=DNA segment, Chr 15, ERATO Doi 417, expressed
1437473_at	481	73	0.15	Maf	Avian musculoaponeurotic fibrosarcoma (v-maf) AS42 oncogene homolog	1456060_at		gb:BB324505 /DB_XREF=gi:9032819 /DB_XREF=BB324505 /CLONE=B430109D01 /FEA=EST /CNT=68 /TID=Mm.18453.1 /TIER=Stack /STK=9 /UG=Mm.18453 /UG_TITLE=ESTs, Highly similar to MAF2 MOUSE TRANSCRIPTION FACTOR MAF2 (M.musculus)
1419725_at	231	34	0.15	Slc26a4	Solute carrier family 26, member 4			gb:NM_011867.1 /DB_XREF=gi:6755021 /GEN=Slc26a4 /FEA=FLmRNA /CNT=9 /TID=Mm.100187.1 /TIER=FL /STK=7 /UG=Mm.100187 /LL=23985 /DEF=Mus musculus solute carrier family 26, member 4 (Slc26a4), mRNA. /PROD=pendrin /FL=gb:NM_011867.1 gb:AF167411.1
1419665_a_at	885	144	0.16	Nupr1	Nuclear protein 1			gb:NM_019738.1 /DB_XREF=gi:9790144 /GEN=Nupr1 /FEA=FLmRNA /CNT=28 /TID=Mm.18742.1 /TIER=FL /STK=7 /UG=Mm.18742 /LL=56312 /DEF=Mus musculus nuclear protein 1 (Nupr1), mRNA. /PROD=p8 protein /FL=gb:AF131196.1 gb:NM_019738.1 gb:BC002109.1
1457424_at	633	101	0.16	Eya1	Eyes absent 1 homolog (Drosophila)			gb:BB760085 /DB_XREF=gi:16206394 /DB_XREF=BB760085 /CLONE=G270124K15 /FEA=EST /CNT=5 /TID=Mm.188433.1 /TIER=ConsEnd /STK=4 /UG=Mm.188433 /UG_TITLE=ESTs
1422754_at	508	80	0.16	Tmod1	Tropomodulin 1			gb:NM_021883.1 /DB_XREF=gi:11230777 /GEN=Tmod1 /FEA=FLmRNA /CNT=45 /TID=Mm.139690.1 /TIER=FL+Stack /STK=14 /UG=Mm.139690 /LL=21916 /DEF=Mus musculus tropomodulin 1 (Tmod1), mRNA. /PROD=tropomodulin /FL=gb:NM_021883.1
1416576_at	449	73	0.16	Socs3	Suppressor of cytokine signaling 3	1455899_x_at	1456212_x_at	gb:NM_007707.1 /DB_XREF=gi:6671757 /GEN=Cish3 /FEA=FLmRNA /CNT=114 /TID=Mm.3468.1 /TIER=FL+Stack /STK=81 /UG=Mm.3468 /LL=12702 /DEF=Mus musculus cytokine inducible SH2-containing protein 3 (Cish3), mRNA. /PROD=cytokine inducible SH2-containing protein 3 /FL=gb:U88328.1 gb:NM_007707.1
1430207_at	338	53	0.16	AV265727	Transcribed locus			gb:AV265727 /DB_XREF=gi:6253762 /DB_XREF=AV265727 /CLONE=4930511C13 /FEA=mRNA /CNT=5 /TID=Mm.133050.1 /TIER=ConsEnd /STK=3 /UG=Mm.133050 /LL=66783 /UG_GENE=4933437N03Rik /UG_TITLE=RIKEN cDNA 4933437N03 gene
1449600_at	245	39	0.16	Gm1683	Gene model 1683, (NCBI)			gb:AA682050 /DB_XREF=gi:2663082 /DB_XREF=vu13b10.s1 /CLONE=IMAGE:1180507 /FEA=EST /CNT=2 /TID=Mm.25191.1 /TIER=ConsEnd /STK=2 /UG=Mm.25191 /UG_TITLE=ESTs
1437980_at	168	28	0.16	BB814947	Transcribed locus			gb:BB814947 /DB_XREF=gi:16987576 /DB_XREF=BB814947 /CLONE=G730026J05 /FEA=EST /CNT=13 /TID=Mm.190421.1 /TIER=Stack /STK=13 /UG=Mm.190421 /UG_TITLE=ESTs
1428492_at	214	36	0.17	Glipr2	GLI pathogenesis-related 2			gb:AK017557.1 /DB_XREF=gi:12856851 /FEA=mRNA /CNT=75 /TID=Mm.22213.1 /TIER=Stack /STK=12 /UG=Mm.22213 /LL=70520 /UG_GENE=5730414A08Rik /UG_TITLE=RIKEN cDNA 5730414A08 gene /DEF=Mus musculus 8 days embryo whole body cDNA, RIKEN full-length enriched library, clone:5730414A08:SCP-like extracellular protein containing protein, full insert sequence.
1422530_at	533	102	0.19	Prph1	Peripherin 1			gb:NM_013639.1 /DB_XREF=gi:7305412 /GEN=Prph1 /FEA=FLmRNA /CNT=54 /TID=Mm.2477.1 /TIER=FL+Stack /STK=44 /UG=Mm.2477 /LL=19132 /DEF=Mus musculus peripherin 1 (Prph1), mRNA. /PROD=peripherin /FL=gb:NM_013639.1
1439407_x_at	200	39	0.19	Tagln2	Transgelin 2			gb:AV212626 /DB_XREF=gi:6154317 /DB_XREF=AV212626 /CLONE=2410115N06 /FEA=EST /CNT=8 /TID=Mm.22632.4 /TIER=Stack /STK=8 /UG=Mm.22632 /UG_TITLE=Mus musculus, Similar to transgelin 2, clone MGC:6300 IMAGE:2654381, mRNA, complete cds
1441657_at	131	25	0.19	Bach2	BTB and CNC homology 2			gb:BI104953 /DB_XREF=gi:14555846 /DB_XREF=602892771F1 /CLONE=IMAGE:5037905 /FEA=EST /CNT=4 /TID=Mm.85089.1 /TIER=ConsEnd /STK=4 /UG=Mm.85089 /UG_TITLE=ESTs
1437165_a_at	951	188	0.2	Pcolce	Procollagen C-endopeptidase enhancer protein			gb:BB250811 /DB_XREF=gi:8943557 /DB_XREF=BB250811 /CLONE=A730043A14 /FEA=EST /CNT=25 /TID=Mm.18808.3 /TIER=Stack /STK=24 /UG=Mm.18808 /LL=18542 /UG_GENE=Pcolce /UG_TITLE=procollagen C-proteinase enhancer protein
1445866_at	605	120	0.2	Mast4	Microtubule associated serine/threonine kinase family member 4			gb:BB152945 /DB_XREF=gi:15408970 /DB_XREF=BB152945 /CLONE=A130009M03 /FEA=EST /CNT=3 /TID=Mm.207487.1 /TIER=ConsEnd /STK=2 /UG=Mm.207487 /UG_TITLE=ESTs
1436295_at	473	93	0.2	Hcrtr1	Hypocretin (orexin) receptor 1			gb:BB803143 /DB_XREF=gi:16975772 /DB_XREF=BB803143 /CLONE=G630052N24 /FEA=EST /CNT=10 /TID=Mm.188970.1 /TIER=Stack /STK=10 /UG=Mm.188970 /UG_TITLE=ESTs
1425849_at	362	74	0.2	Chrnb4	Cholinergic receptor, nicotinic, beta polypeptide 4	1457008_at		gb:AF492840.1 /DB_XREF=gi:20136399 /GEN=Chrnb4 /FEA=FLmRNA /CNT=3 /TID=Mm.219524.1 /TIER=FL /STK=1 /UG=Mm.219524 /DEF=Mus musculus nicotinic acetylcholine receptor beta4 subunit (Chrnb4) mRNA, complete cds. /PROD=nicotinic acetylcholine receptor beta4 subunit /FL=gb:AF492840.1
1427240_at	122	25	0.2	Dock6	Dedicator of cytokinesis 6			gb:AK016495.1 /DB_XREF=gi:12855259 /FEA=mRNA /CNT=78 /TID=Mm.34452.1 /TIER=Stack /STK=46 /UG=Mm.34452 /LL=67539 /UG_GENE=4931431C02Rik /UG_TITLE=RIKEN cDNA 4931431C02 gene /DEF=Mus musculus adult male testis cDNA, RIKEN full-length enriched library, clone:4931431C02:homolog to KIAA1395 PROTEIN (FRAGMENT), full insert sequence.
Nrl-downregulated genes
Affy_ID	Nrl_ave	B6_ave	B6_ave/Nrl_ave	Gene symbol	Gene name	Additional Affy_IDs			Additional gene information
1451763_at	4	13262	3552.21	Cnga1	Cyclic nucleotide gated channel alpha 1				gb:U19717.1 /DB_XREF=gi:885885 /FEA=FLmRNA /CNT=17 /TID=Mm.23793.1 /TIER=FL /STK=1 /UG=Mm.23793 /LL=12788 /UG_GENE=Cncg /DEF=Mus musculus cGMP-gated cation channel mRNA, clone mIMCD-K2 no.1, complete cds. /PROD=cGMP-gated cation channel /FL=gb:M84742.1 gb:U19717.1
1460212_at	34	37251	1088.15	Gnat1	Guanine nucleotide binding protein, alpha transducing 1				gb:BC022793.1 /DB_XREF=gi:18606311 /FEA=FLmRNA /CNT=322 /TID=Mm.69061.1 /TIER=FL+Stack /STK=39 /UG=Mm.69061 /LL=14685 /UG_GENE=Gnat1 /DEF=Mus musculus, guanine nucleotide binding protein, alpha transducing 1, clone MGC:27622 IMAGE:4505478, mRNA, complete cds. /PROD=guanine nucleotide binding protein, alphatransducing 1 /FL=gb:NM_008140.1 gb:BC022793.1
1450946_at	32	31197	967.86	Nrl	Neural retina leucine zipper gene				gb:BG298773 /DB_XREF=gi:13063762 /DB_XREF=602396508F1 /CLONE=IMAGE:4511449 /FEA=FLmRNA /CNT=58 /TID=Mm.20422.1 /TIER=Stack /STK=13 /UG=Mm.20422 /LL=18185 /UG_GENE=Nrl /UG_TITLE=neural retina leucine zipper gene /FL=gb:NM_008736.1 gb:L14935.1
1425171_at	41	34539	846.55	Rho	Rhodopsin	1425172_at	1451617_at	1451618_at	gb:BG296967 /DB_XREF=gi:13060148 /DB_XREF=602394811F1 /CLONE=IMAGE:4506602 /FEA=FLmRNA /CNT=341 /TID=Mm.2965.1 /TIER=Stack /STK=18 /UG=Mm.2965 /UG_TITLE=Mus musculus, Similar to rhodopsin (opsin 2, rod pigment) (retinitis pigmentosa 4, autosomal dominant), clone MGC:21585 IMAGE:4500760, mRNA, complete cds /FL=gb:BC013125.1
1452243_at	79	7629	96.29	Kcnj14	Potassium inwardly-rectifying channel, subfamily J, member 14				gb:BB282273 /DB_XREF=gi:15411146 /DB_XREF=BB282273 /CLONE=A930036I05 /FEA=mRNA /CNT=62 /TID=Mm.68170.1 /TIER=Stack /STK=37 /UG=Mm.68170 /UG_TITLE=Mus musculus, clone IMAGE:4482148, mRNA, partial cds
1419740_at	593	26492	44.67	Pde6b	Phosphodiesterase 6B, cGMP, rod receptor, beta polypeptide				gb:NM_008806.1 /DB_XREF=gi:6679254 /GEN=Pde6b /FEA=FLmRNA /CNT=85 /TID=Mm.1372.1 /TIER=FL /STK=6 /UG=Mm.1372 /LL=18587 /DEF=Mus musculus phosphodiesterase 6B, cGMP, rod receptor, beta polypeptide (Pde6b), mRNA. /PROD=phosphodiesterase 6B, cGMP, rod receptor, betapolypeptide /FL=gb:NM_008806.1
1417432_a_at	619	18627	30.09	Gnb1	Guanine nucleotide binding protein, beta 1	1454696_at			gb:NM_008142.1 /DB_XREF=gi:6680044 /GEN=Gnb1 /FEA=FLmRNA /CNT=64 /TID=Mm.2344.1 /TIER=FL+Stack /STK=45 /UG=Mm.2344 /LL=14688 /DEF=Mus musculus guanine nucleotide binding protein, beta 1 (Gnb1), mRNA. /PROD=guanine nucleotide-binding protein, beta-1subunit /FL=gb:U29055.1 gb:NM_008142.1
1451549_at	436	7513	17.22	BC016201	CDNA sequence BC016201				gb:BC016201.1 /DB_XREF=gi:16740639 /FEA=FLmRNA /CNT=20 /TID=Mm.206230.1 /TIER=FL+Stack /STK=10 /UG=Mm.206230 /DEF=Mus musculus, Similar to cyclic nucleotide-gated channel beta subunit 1, clone MGC:27656 IMAGE:4527347, mRNA, complete cds. /PROD=Similar to cyclic nucleotide-gated channel betasubunit 1 /FL=gb:BC016201.1
1430128_a_at	1156	19573	16.94	Reep6	Receptor accessory protein 6				gb:AK002562.1 /DB_XREF=gi:12832633 /FEA=mRNA /CNT=17 /TID=Mm.28147.2 /TIER=ConsEnd /STK=3 /UG=Mm.28147 /LL=70335 /UG_GENE=0610011M24Rik /UG_TITLE=RIKEN cDNA 0610011M24 gene /DEF=Mus musculus adult male kidney cDNA, RIKEN full-length enriched library, clone:0610011M24:POLYPOSIS LOCUS PROTEIN 1-LIKE 1 (TB2 PROTEIN-LIKE 1), full insert sequence.
1451647_at	385	5670	14.75	Slc24a1	Solute carrier family 24 (sodium/potassium/calcium exchanger), member 1				gb:BC016094.1 /DB_XREF=gi:16359261 /FEA=FLmRNA /CNT=28 /TID=Mm.156243.1 /TIER=FL /STK=3 /UG=Mm.156243 /DEF=Mus musculus, Similar to sodiumcalciumpotassium exchanger, clone MGC:27617 IMAGE:4504496, mRNA, complete cds. /PROD=Similar to sodiumcalciumpotassium exchanger /FL=gb:BC016094.1
1425288_at	554	7855	14.18	Samd11	Sterile alpha motif domain containing 11				gb:BC026991.1 /DB_XREF=gi:20073348 /FEA=FLmRNA /CNT=17 /TID=Mm.69049.2 /TIER=FL /STK=3 /UG=Mm.69049 /LL=57741 /UG_GENE=AF155546 /DEF=Mus musculus, similar to unnamed protein product, clone MGC:38976 IMAGE:5363470, mRNA, complete cds. /PROD=similar to unnamed protein product /FL=gb:BC026991.1
1417298_at	1004	8383	8.35	Ebpl	Emopamil binding protein-like	1458177_at			gb:BC027422.1 /DB_XREF=gi:20073245 /FEA=FLmRNA /CNT=72 /TID=Mm.22758.1 /TIER=FL+Stack /STK=49 /UG=Mm.22758 /LL=68177 /UG_GENE=5730442K12Rik /DEF=Mus musculus, RIKEN cDNA 5730442K12 gene, clone MGC:35635 IMAGE:4035224, mRNA, complete cds. /PROD=RIKEN cDNA 5730442K12 gene /FL=gb:BC027422.1 gb:AF243434.2 gb:NM_026598.1
1435096_at	738	5397	7.31	Ric8b	Resistance to inhibitors of cholinesterase 8 homolog B (C. elegans)				gb:BB667093 /DB_XREF=gi:16398542 /DB_XREF=BB667093 /CLONE=4022435G01 /FEA=EST /CNT=31 /TID=Mm.18936.1 /TIER=Stack /STK=20 /UG=Mm.18936 /UG_TITLE=ESTs, Weakly similar to synembryn (Mus musculus) (M.musculus)
1433699_at	835	6004	7.19	Tnfaip3	Tumor necrosis factor, alpha-induced protein 3	1450829_at			gb:BM241351 /DB_XREF=gi:17876621 /DB_XREF=K0615G01-3 /CLONE=K0615G01 /FEA=EST /CNT=80 /TID=Mm.116683.1 /TIER=Stack /STK=70 /UG=Mm.116683 /UG_TITLE=ESTs
1423179_at	1536	10666	6.94	Kcnb1	Potassium voltage gated channel, Shab-related subfamily, member 1	1423180_at			gb:BB324482 /DB_XREF=gi:16403514 /DB_XREF=BB324482 /CLONE=B430109A15 /FEA=FLmRNA /CNT=160 /TID=Mm.54162.1 /TIER=Stack /STK=33 /UG=Mm.54162 /LL=16500 /UG_GENE=Kcnb1 /UG_TITLE=potassium voltage gated channel, Shab-related subfamily, member 1 /FL=gb:NM_008420.1 gb:M64228.1
1417430_at	843	5429	6.44	Cdr2	Cerebellar degeneration-related 2				gb:NM_007672.1 /DB_XREF=gi:6671729 /GEN=Cdr2 /FEA=FLmRNA /CNT=104 /TID=Mm.1640.1 /TIER=FL+Stack /STK=45 /UG=Mm.1640 /LL=12585 /DEF=Mus musculus cerebellar degeneration-related 2 (Cdr2), mRNA. /PROD=cerebellar degeneration-related 2 /FL=gb:NM_007672.1 gb:U88588.1
1425138_at	3964	22046	5.56	Guca1b	Guanylate cyclase activator 1B	1425441_at			gb:BC018480.1 /DB_XREF=gi:17391130 /FEA=FLmRNA /CNT=56 /TID=Mm.59151.1 /TIER=FL /STK=5 /UG=Mm.59151 /DEF=Mus musculus, clone MGC:21424 IMAGE:4500919, mRNA, complete cds. /PROD=Unknown (protein for MGC:21424) /FL=gb:BC018480.1 gb:BC018258.1
1434603_at	1214	5362	4.42	Thrap2	Thyroid hormone receptor associated protein 2				gb:BG074645 /DB_XREF=gi:12557214 /DB_XREF=H3137F02-3 /CLONE=H3137F02 /FEA=EST /CNT=146 /TID=Mm.206238.1 /TIER=Stack /STK=42 /UG=Mm.206238 /UG_TITLE=ESTs, Moderately similar to T42707 hypothetical protein DKFZp586E041.1 (H.sapiens)
1440838_at	2178	9552	4.39	AI852064	Expressed sequence AI852064				gb:BQ126997 /DB_XREF=gi:20200908 /DB_XREF=ii57h06.x1 /CLONE=IMAGE:5946082 /FEA=EST /CNT=17 /TID=Mm.40297.1 /TIER=ConsEnd /STK=4 /UG=Mm.40297 /LL=99104 /UG_GENE=AI852064 /UG_TITLE=expressed sequence AI852064
1456487_at	1820	7016	3.86	Adcy1	Adenylate cyclase 1				gb:AI848263 /DB_XREF=gi:5492169 /DB_XREF=UI-M-AH1-agu-d-07-0-UI.s1 /CLONE=UI-M-AH1-agu-d-07-0-UI /FEA=EST /CNT=22 /TID=Mm.38576.1 /TIER=Stack /STK=9 /UG=Mm.38576 /LL=52867 /UG_GENE=D11Bwg1392e /UG_TITLE=DNA segment, Chr 11, Brigham & Womens Genetics 1392 expressed
1420760_s_at	2013	7367	3.66	Ndrg1	N-myc downstream regulated gene 1	1456174_x_at			gb:NM_008681.1 /DB_XREF=gi:6679029 /GEN=Ndrl /FEA=FLmRNA /CNT=5 /TID=Mm.30837.1 /TIER=FL /STK=3 /UG=Mm.30837 /LL=17990 /DEF=Mus musculus N-myc downstream regulated-like (Ndrl), mRNA. /PROD=N-myc downstream regulated-like /FL=gb:NM_008681.1 gb:U52073.1
1426716_at	2741	9477	3.46	Tdrd7	Tudor domain containing 7				gb:BC025099.1 /DB_XREF=gi:19263616 /FEA=mRNA /CNT=112 /TID=Mm.30935.1 /TIER=Stack /STK=95 /UG=Mm.30935 /DEF=Mus musculus, clone IMAGE:4512174, mRNA, partial cds. /PROD=Unknown (protein for IMAGE:4512174)
1434313_at	2698	9089	3.37	6330407D12Rik	RIKEN cDNA 6330407D12 gene				gb:BB762434 /DB_XREF=gi:16207584 /DB_XREF=BB762434 /CLONE=G370010L10 /FEA=EST /CNT=45 /TID=Mm.32416.1 /TIER=Stack /STK=35 /UG=Mm.32416 /LL=58912 /UG_GENE=AI465320 /UG_TITLE=EST AI465320
1448996_at	6218	19815	3.19	Rom1	Rod outer segment membrane protein 1				gb:NM_009073.1 /DB_XREF=gi:6677762 /GEN=Rom1 /FEA=FLmRNA /CNT=78 /TID=Mm.679.1 /TIER=FL+Stack /STK=28 /UG=Mm.679 /LL=19881 /DEF=Mus musculus rod outer segment membrane protein 1 (Rom1), mRNA. /PROD=rod outer segment membrane protein 1 /FL=gb:BC014827.1 gb:NM_009073.1
1438160_x_at	1735	5508	3.18	Slco4a1	Solute carrier organic anion transporter family, member 4a1	1455803_at			gb:AV348121 /DB_XREF=gi:6389180 /DB_XREF=AV348121 /CLONE=6430631M08 /FEA=EST /CNT=12 /TID=Mm.133687.2 /TIER=Stack /STK=12 /UG=Mm.133687 /UG_TITLE=ESTs, Weakly similar to RIKEN cDNA 1700022M03 (Mus musculus) (M.musculus)
1424963_at	4081	12129	2.97	Rp1h	Retinitis pigmentosa 1 homolog (human)				gb:AF155141.2 /DB_XREF=gi:18152811 /GEN=Rp1 /FEA=FLmRNA /CNT=36 /TID=Mm.78749.1 /TIER=FL+Stack /STK=10 /UG=Mm.78749 /LL=19888 /DEF=Mus musculus oxygen-regulated photoreceptor protein 1 (Rp1) mRNA, complete cds. /PROD=oxygen-regulated photoreceptor protein 1 /FL=gb:AF155141.2
1423653_at	1717	5107	2.97	Atp1a1	ATPase, Na+/K+ transporting, alpha 1 polypeptide	1451071_a_at			gb:BC025618.1 /DB_XREF=gi:19343735 /FEA=FLmRNA /CNT=513 /TID=Mm.205791.1 /TIER=FL+Stack /STK=208 /UG=Mm.205791 /DEF=Mus musculus, clone MGC:38134 IMAGE:5320976, mRNA, complete cds. /PROD=Unknown (protein for MGC:38134) /FL=gb:BC025811.1 gb:BC025618.1 gb:BC025627.1 gb:BC021496.1
1428637_at	2384	6822	2.86	Dyrk2	Dual-specificity tyrosine-(Y)-phosphorylation regulated kinase 2				gb:AK007736.1 /DB_XREF=gi:12841473 /FEA=mRNA /CNT=50 /TID=Mm.45565.1 /TIER=Stack /STK=28 /UG=Mm.45565 /LL=69181 /UG_GENE=1810038L18Rik /UG_TITLE=RIKEN cDNA 1810038L18 gene /DEF=Mus musculus 10 day old male pancreas cDNA, RIKEN full-length enriched library, clone:1810038L18:unclassifiable transcript, full insert sequence.
1424256_at	4517	12548	2.78	Rdh12	Retinol dehydrogenase 12				gb:BC016204.1 /DB_XREF=gi:16740648 /FEA=FLmRNA /CNT=56 /TID=Mm.121647.1 /TIER=FL+Stack /STK=42 /UG=Mm.121647 /LL=77974 /UG_GENE=A930033N07Rik /DEF=Mus musculus, Similar to RIKEN cDNA A930033N07 gene, clone MGC:27665 IMAGE:4527851, mRNA, complete cds. /PROD=Similar to RIKEN cDNA A930033N07 gene /FL=gb:BC016204.1
1435800_a_at	5667	15518	2.74	Csda	Cold shock domain protein A	1451012_a_at			gb:BB779100 /DB_XREF=gi:16939800 /DB_XREF=BB779100 /CLONE=G430050O16 /FEA=EST /CNT=17 /TID=Mm.193526.3 /TIER=Stack /STK=13 /UG=Mm.193526 /LL=56449 /UG_GENE=Csda /UG_TITLE=cold shock domain protein A
1428289_at	1964	5099	2.6	Klf9	Kruppel-like factor 9				gb:BE133935 /DB_XREF=gi:8596435 /DB_XREF=ug14c02.x1 /CLONE=IMAGE:1531586 /FEA=mRNA /CNT=144 /TID=Mm.183017.1 /TIER=Stack /STK=11 /UG=Mm.183017 /LL=70273 /UG_GENE=2310051E17Rik /UG_TITLE=RIKEN cDNA 2310051E17 gene
1417542_at	2351	5835	2.48	Rps6ka2	Ribosomal protein S6 kinase, polypeptide 2				gb:NM_011299.1 /DB_XREF=gi:6755373 /GEN=Rps6ka2 /FEA=FLmRNA /CNT=100 /TID=Mm.32033.1 /TIER=FL+Stack /STK=42 /UG=Mm.32033 /LL=20112 /DEF=Mus musculus ribosomal protein S6 kinase, 90kD, polypeptide 2 (Rps6ka2), mRNA. /PROD=ribosomal protein S6 kinase, 90kD, polypeptide2 /FL=gb:NM_011299.1
1435462_at	2763	6785	2.46	LOC433022	Hypothetical LOC433022				gb:BI738661 /DB_XREF=gi:15715674 /DB_XREF=603358883F1 /CLONE=IMAGE:5366013 /FEA=EST /CNT=45 /TID=Mm.41360.1 /TIER=Stack /STK=8 /UG=Mm.41360 /LL=106419 /UG_GENE=AW494639 /UG_TITLE=expressed sequence AW494639
1435869_s_at	2488	5871	2.36	Ap2a2	Adaptor protein complex AP-2, alpha 2 subunit	1455482_at			gb:BQ175609 /DB_XREF=gi:20351101 /DB_XREF=UI-M-DJ2-bvx-m-04-0-UI.s1 /CLONE=UI-M-DJ2-bvx-m-04-0-UI /FEA=EST /CNT=86 /TID=Mm.632.6 /TIER=Stack /STK=12 /UG=Mm.632 /LL=21956 /UG_GENE=Tnnt2 /UG_TITLE=troponin T2, cardiac
1433585_at	2827	6650	2.35	Tnpo1	Transportin 1				gb:BI696984 /DB_XREF=gi:15659613 /DB_XREF=603348436F1 /CLONE=IMAGE:5376033 /FEA=EST /CNT=153 /TID=Mm.29005.1 /TIER=Stack /STK=86 /UG=Mm.29005 /LL=105287 /UG_GENE=AU021749 /UG_TITLE=expressed sequence AU021749
1421144_at	5252	12183	2.32	Rpgrip1	Retinitis pigmentosa GTPase regulator interacting protein 1				gb:NM_023879.1 /DB_XREF=gi:13569851 /GEN=Rpgrip1 /FEA=FLmRNA /CNT=35 /TID=Mm.21662.1 /TIER=FL /STK=2 /UG=Mm.21662 /LL=77945 /DEF=Mus musculus retinitis pigmentosa GTPase regulator interacting protein 1 (Rpgrip1), mRNA. /PROD=retinitis pigmentosa GTPase regulatorinteracting protein 1 /FL=gb:AY008297.1 gb:NM_023879.1
1438641_x_at	8827	20372	2.31	Aldoa	Aldolase 1, A isoform	1452806_at	1452807_s_at		gb:BB391156 /DB_XREF=gi:9114104 /DB_XREF=BB391156 /CLONE=C230073G08 /FEA=EST /CNT=10 /TID=Mm.62181.1 /TIER=Stack /STK=10 /UG=Mm.62181 /UG_TITLE=ESTs
1420925_at	2305	5228	2.27	Tub	Tubby candidate gene				gb:BM116982 /DB_XREF=gi:17080000 /DB_XREF=L0844E10-3 /CLONE=L0844E10 /FEA=FLmRNA /CNT=91 /TID=Mm.4804.1 /TIER=Stack /STK=20 /UG=Mm.4804 /LL=22141 /UG_GENE=tub /UG_TITLE=tubby /FL=gb:NM_021885.1 gb:U52433.1 gb:U54643.1
1437287_at	2832	6341	2.24	1110020G09Rik	RIKEN cDNA 1110020G09 gene				gb:BB277742 /DB_XREF=gi:15410953 /DB_XREF=BB277742 /CLONE=A930007D01 /FEA=EST /CNT=136 /TID=Mm.42110.2 /TIER=Stack /STK=10 /UG=Mm.42110 /LL=68646 /UG_GENE=1110020G09Rik /UG_TITLE=RIKEN cDNA 1110020G09 gene
1439148_a_at	4475	9936	2.22	Pfkl	Phosphofructokinase, liver, B-type	1450269_a_at			gb:BE914497 /DB_XREF=gi:10413185 /DB_XREF=601668889F1 /CLONE=IMAGE:3968567 /FEA=EST /CNT=11 /TID=Mm.1166.4 /TIER=Stack /STK=8 /UG=Mm.1166 /LL=18641 /UG_GENE=Pfkl /UG_TITLE=phosphofructokinase, liver, B-type
1421084_at	3316	7253	2.19	Rs1h	Retinoschisis 1 homolog (human)				gb:AF073780.1 /DB_XREF=gi:5114034 /GEN=Xlrs1 /FEA=FLmRNA /CNT=41 /TID=Mm.41982.1 /TIER=FL /STK=2 /UG=Mm.41982 /LL=20147 /DEF=Mus musculus X-linked juvenile retinoschisis protein (Xlrs1) mRNA, complete cds. /PROD=X-linked juvenile retinoschisis protein /FL=gb:NM_011302.1 gb:AF073780.1 gb:AF084561.1
1447905_x_at	3152	6860	2.18	Nup62	Nucleoporin 62				gb:BB331755 /DB_XREF=gi:9040518 /DB_XREF=BB331755 /CLONE=B730038J24 /FEA=EST /CNT=2 /TID=Mm.149632.1 /TIER=ConsEnd /STK=2 /UG=Mm.149632 /UG_TITLE=ESTs
1417378_at	4392	9307	2.12	Igsf4a	Immunoglobulin superfamily, member 4A				gb:BB832194 /DB_XREF=gi:17010437 /DB_XREF=BB832194 /CLONE=G930021B16 /FEA=FLmRNA /CNT=246 /TID=Mm.20921.1 /TIER=Stack /STK=20 /UG=Mm.20921 /LL=54725 /UG_GENE=Igsf4 /UG_TITLE=immunoglobulin superfamily, member 4 /FL=gb:NM_018770.1 gb:AF061260.1 gb:AB021965.1 gb:AB021964.1 gb:AB052293.1 gb:AF434663.1
1418181_at	4049	8545	2.11	Ptp4a3	Protein tyrosine phosphatase 4a3				gb:BC027445.1 /DB_XREF=gi:20071662 /FEA=FLmRNA /CNT=79 /TID=Mm.153891.1 /TIER=FL+Stack /STK=28 /UG=Mm.153891 /LL=19245 /UG_GENE=Ptp4a3 /DEF=Mus musculus, protein tyrosine phosphatase 4a3, clone MGC:36146 IMAGE:4482106, mRNA, complete cds. /PROD=protein tyrosine phosphatase 4a3 /FL=gb:NM_008975.1 gb:AF035645.1 gb:BC027445.1
1449628_s_at	3941	8276	2.1	Stard7	START domain containing 7				gb:AI852671 /DB_XREF=gi:5496577 /DB_XREF=UI-M-BH0-aji-b-08-0-UI.s1 /CLONE=UI-M-BH0-aji-b-08-0-UI /FEA=EST /CNT=1 /TID=Mm.219882.1 /TIER=ConsEnd /STK=1 /UG=Mm.219882 /LL=99107 /UG_GENE=AI852671 /UG_TITLE=expressed sequence AI852671
1435436_at	3158	6613	2.09	Epas1	Endothelial PAS domain protein 1				gb:BI647951 /DB_XREF=gi:15562187 /DB_XREF=603276037F1 /CLONE=IMAGE:5316560 /FEA=EST /CNT=46 /TID=Mm.87705.1 /TIER=Stack /STK=16 /UG=Mm.87705 /UG_TITLE=ESTs
1429761_at	3169	6607	2.09	Rtn1	Reticulon 1				gb:BF455257 /DB_XREF=gi:11521426 /DB_XREF=UI-M-BZ1-bkb-f-12-0-UI.s1 /CLONE=UI-M-BZ1-bkb-f-12-0-UI /FEA=mRNA /CNT=164 /TID=Mm.29075.1 /TIER=Stack /STK=8 /UG=Mm.29075 /LL=66093 /UG_GENE=0710005K15Rik /UG_TITLE=RIKEN cDNA 0710005K15 gene
1417953_at	2989	6259	2.09	D6Wsu176e	DNA segment, Chr 6, Wayne State University 176, expressed				gb:NM_138587.1 /DB_XREF=gi:20070393 /GEN=D6Wsu176e /FEA=FLmRNA /CNT=112 /TID=Mm.27673.1 /TIER=FL+Stack /STK=32 /UG=Mm.27673 /LL=27999 /DEF=Mus musculus DNA segment, Chr 6, Wayne State University 176, expressed (D6Wsu176e), mRNA. /PROD=DNA segment, Chr 6, Wayne State University 176,expressed /FL=gb:BC009086.1 gb:NM_138587.1
1425167_a_at	6870	13938	2.03	Gngt1	Guanine nucleotide binding protein (G protein), gamma transducing activity polypeptide 1	1425168_at			gb:BC023064.1 /DB_XREF=gi:18606499 /FEA=FLmRNA /CNT=7 /TID=Mm.95398.1 /TIER=FL /STK=5 /UG=Mm.95398 /LL=14699 /UG_GENE=Gng1 /DEF=Mus musculus, Similar to guanine nucleotide binding protein (G protein), gamma 1 subunit, clone MGC:38870 IMAGE:5361463, mRNA, complete cds. /PROD=Similar to guanine nucleotide binding protein (Gprotein), gamma 1 subunit /FL=gb:BC023064.1
1435392_at	3523	7037	2	Wdr17	WD repeat domain 17				gb:BB277182 /DB_XREF=gi:15410925 /DB_XREF=BB277182 /CLONE=A930002M15 /FEA=EST /CNT=19 /TID=Mm.95281.1 /TIER=Stack /STK=17 /UG=Mm.95281 /UG_TITLE=ESTs
1423631_at	22	4040	184.46	Nr2e3	Nuclear receptor subfamily 2, group E, member 3				gb:BB540797 /DB_XREF=gi:15412216 /DB_XREF=BB540797 /CLONE=E130109K18 /FEA=FLmRNA /CNT=44 /TID=Mm.103641.1 /TIER=Stack /STK=8 /UG=Mm.103641 /LL=23958 /UG_GENE=Nr2e3 /UG_TITLE=nuclear receptor subfamily 2, group E, member 3 /FL=gb:NM_013708.1 gb:AF204053.1 gb:AF148129.1 gb:BC017521.1
1430945_at	9	1026	120.73	A930028C08Rik	RIKEN cDNA A930028C08 gene				gb:AK020898.1 /DB_XREF=gi:12861625 /FEA=mRNA /CNT=3 /TID=Mm.195799.1 /TIER=ConsEnd /STK=1 /UG=Mm.195799 /LL=77822 /UG_GENE=A930028C08Rik /UG_TITLE=RIKEN cDNA A930028C08 gene /DEF=Mus musculus adult retina cDNA, RIKEN full-length enriched library, clone:A930028C08:unclassifiable, full insert sequence.
1458418_at	41	3973	96.05	BB282649	Transcribed locus				gb:BB282649 /DB_XREF=gi:16401375 /DB_XREF=BB282649 /CLONE=A930039E13 /FEA=EST /CNT=6 /TID=Mm.208796.1 /TIER=ConsEnd /STK=2 /UG=Mm.208796 /UG_TITLE=ESTs
1448593_at	35	1975	56.76	Wisp1	WNT1 inducible signaling pathway protein 1	1448594_at			gb:AF100777.1 /DB_XREF=gi:4028576 /GEN=Wisp1 /FEA=FLmRNA /CNT=99 /TID=Mm.10222.1 /TIER=FL+Stack /STK=56 /UG=Mm.10222 /LL=22402 /DEF=Mus musculus connective tissue growth factor related protein WISP-1 (Wisp1) mRNA, complete cds. /PROD=connective tissue growth factor related proteinWISP-1 /FL=gb:AF100777.1 gb:NM_018865.1 gb:AB004873.1
1428975_at	166	3589	21.65	Susd3	Sushi domain containing 3				gb:AK003860.1 /DB_XREF=gi:12834784 /FEA=mRNA /CNT=36 /TID=Mm.34308.1 /TIER=Stack /STK=15 /UG=Mm.34308 /LL=66329 /UG_GENE=1700017I11Rik /UG_TITLE=RIKEN cDNA 1700017I11 gene /DEF=Mus musculus 18 days embryo whole body cDNA, RIKEN full-length enriched library, clone:1110020G21:Sushi domain (SCR repeat) containing protein, full insert sequence.
1431174_at	131	2657	20.26	A930036K24Rik	RIKEN cDNA A930036K24 gene				gb:BG297411 /DB_XREF=gi:13061036 /DB_XREF=602395554F1 /CLONE=IMAGE:4507164 /FEA=mRNA /CNT=11 /TID=Mm.134224.1 /TIER=ConsEnd /STK=0 /UG=Mm.134224 /LL=77829 /UG_GENE=A930036K24Rik /UG_TITLE=RIKEN cDNA A930036K24 gene
1433727_at	156	2494	16.01	BC038479	CDNA sequence BC038479	1433728_at			gb:AV025920 /DB_XREF=gi:16356455 /DB_XREF=AV025920 /CLONE=1200016J01 /FEA=EST /CNT=106 /TID=Mm.27909.1 /TIER=Stack /STK=66 /UG=Mm.27909 /UG_TITLE=ESTs, Weakly similar to BETA-GALACTOSIDASE PRECURSOR (M.musculus)
1416203_at	118	1828	15.5	Aqp1	Aquaporin 1				gb:NM_007472.1 /DB_XREF=gi:6680709 /GEN=Aqp1 /FEA=FLmRNA /CNT=262 /TID=Mm.18625.1 /TIER=FL+Stack /STK=113 /UG=Mm.18625 /LL=11826 /DEF=Mus musculus aquaporin 1 (Aqp1), mRNA. /PROD=aquaporin 1 /FL=gb:NM_007472.1 gb:BC007125.1 gb:L02914.1
1451210_at	249	3557	14.28	Ppap2c	Phosphatidic acid phosphatase type 2c				gb:BC010332.1 /DB_XREF=gi:16307570 /FEA=FLmRNA /CNT=117 /TID=Mm.28873.2 /TIER=FL+Stack /STK=62 /UG=Mm.28873 /LL=50784 /UG_GENE=Ppap2c /DEF=Mus musculus, phosphatidic acid phosphatase type 2c, clone MGC:6301 IMAGE:2654393, mRNA, complete cds. /PROD=phosphatidic acid phosphatase type 2c /FL=gb:BC010332.1
1417288_at	147	1894	12.92	Plekha2	Pleckstrin homology domain-containing, family A (phosphoinositide binding specific) member 2	1436177_at			gb:BC010215.1 /DB_XREF=gi:16307353 /FEA=FLmRNA /CNT=134 /TID=Mm.148782.1 /TIER=FL+Stack /STK=49 /UG=Mm.148782 /LL=83436 /UG_GENE=Plekha2 /DEF=Mus musculus, pleckstrin homology domain-containing, family A (phosphoinositide binding specific) member 2andem PH Domain containing protein 2, clone MGC:7728 IMAGE:3498236, mRNA, complete cds. /PROD=pleckstrin homology domain-containing, family A(phosphoin…
1457010_at	91	1106	12.15	3010001F23Rik	RIKEN cDNA 3010001F23 gene				gb:AW049649 /DB_XREF=gi:5910178 /DB_XREF=UI-M-BH1-and-g-09-0-UI.s1 /CLONE=UI-M-BH1-and-g-09-0-UI /FEA=EST /CNT=6 /TID=Mm.44979.1 /TIER=ConsEnd /STK=6 /UG=Mm.44979 /UG_TITLE=ESTs
1425408_a_at	409	4167	10.18	2610034M16Rik	RIKEN cDNA 2610034M16 gene				gb:BC024774.1 /DB_XREF=gi:19353722 /FEA=FLmRNA /CNT=4 /TID=Mm.179408.1 /TIER=FL /STK=2 /UG=Mm.179408 /LL=69239 /UG_GENE=2610034M16Rik /DEF=Mus musculus, Similar to RIKEN cDNA 2610034M16 gene, clone MGC:38949 IMAGE:5363112, mRNA, complete cds. /PROD=Similar to RIKEN cDNA 2610034M16 gene /FL=gb:BC024774.1
1440605_at	176	1767	10.04	Fscn2	Fascin homolog 2, actin-bundling protein, retinal (Strongylocentrotus purpuratus)				gb:BB279997 /DB_XREF=gi:16401211 /DB_XREF=BB279997 /CLONE=A930022G03 /FEA=EST /CNT=5 /TID=Mm.134230.1 /TIER=ConsEnd /STK=5 /UG=Mm.134230 /UG_TITLE=ESTs, Weakly similar to FASCIN (M.musculus)
1424650_at	263	2293	8.71	Pdia5	Protein disulfide isomerase associated 5				gb:BC009151.1 /DB_XREF=gi:14318712 /FEA=FLmRNA /CNT=57 /TID=Mm.71015.1 /TIER=FL+Stack /STK=21 /UG=Mm.71015 /LL=72599 /UG_GENE=2700053F16Rik /DEF=Mus musculus, Similar to for protein disulfide isomerase-related, clone MGC:11961 IMAGE:3600849, mRNA, complete cds. /PROD=Similar to for protein disulfideisomerase-related /FL=gb:BC009151.1
1450816_at	414	3379	8.16	Polg2	Polymerase (DNA directed), gamma 2, accessory subunit				gb:NM_015810.1 /DB_XREF=gi:7657466 /GEN=Polg2 /FEA=FLmRNA /CNT=18 /TID=Mm.859.1 /TIER=FL /STK=0 /UG=Mm.859 /LL=50776 /DEF=Mus musculus polymerase, gamma 2 (Polg2), mRNA. /PROD=mitochondrial polymerase gamma 2 /FL=gb:NM_015810.1 gb:AF177202.1
1455140_at	525	3971	7.56	A330068P14Rik	RIKEN cDNA A330068P14 gene	1458956_at			gb:AV376568 /DB_XREF=gi:15412300 /DB_XREF=AV376568 /CLONE=9130211A20 /FEA=EST /CNT=28 /TID=Mm.33118.1 /TIER=Stack /STK=23 /UG=Mm.33118 /LL=103854 /UG_GENE=AI848332 /UG_TITLE=expressed sequence AI848332
1436277_at	369	2630	7.13	D330010C22Rik	RIKEN cDNA 330010C22 gene				gb:BI734893 /DB_XREF=gi:15711906 /DB_XREF=603356092F1 /CLONE=IMAGE:5363375 /FEA=EST /CNT=10 /TID=Mm.29356.2 /TIER=Stack /STK=10 /UG=Mm.29356 /LL=97166 /UG_GENE=C80758 /UG_TITLE=expressed sequence C80758
1446754_a_at	180	1229	6.84	Vax2os1	Vax2 opposite strand transcript 1	1443232_at			gb:BM936191 /DB_XREF=gi:19395343 /DB_XREF=UI-M-CG0p-bqa-g-09-0-UI.r1 /CLONE=UI-M-CG0p-bqa-g-09-0-UI /FEA=EST /CNT=2 /TID=Mm.185937.2 /TIER=ConsEnd /STK=2 /UG=Mm.185937 /UG_TITLE=ESTs
1417884_at	193	1306	6.77	X83328	EST X83328				gb:NM_134038.1 /DB_XREF=gi:19527253 /GEN=AW743111 /FEA=FLmRNA /CNT=64 /TID=Mm.203951.1 /TIER=FL+Stack /STK=34 /UG=Mm.203951 /LL=104681 /DEF=Mus musculus expressed sequence AW743111 (AW743111), mRNA. /PROD=expressed sequence AW743111 /FL=gb:NM_134038.1 gb:BC017129.1
1424895_at	714	4416	6.18	Gpsm2	G-protein signalling modulator 2 (AGS3-like, C. elegans)				gb:BC021308.1 /DB_XREF=gi:18204661 /FEA=FLmRNA /CNT=32 /TID=Mm.220948.1 /TIER=FL+Stack /STK=12 /UG=Mm.220948 /LL=76123 /UG_GENE=6230410J09Rik /DEF=Mus musculus, Similar to LGN protein, clone MGC:29185 IMAGE:5007832, mRNA, complete cds. /PROD=Similar to LGN protein /FL=gb:BC021308.1
1435303_at	268	1599	5.96	Taf4b	TAF4B RNA polymerase II, TATA box binding protein (TBP)-associated factor				gb:AV373814 /DB_XREF=gi:15412259 /DB_XREF=AV373814 /CLONE=9130002C20 /FEA=EST /CNT=38 /TID=Mm.86376.1 /TIER=Stack /STK=10 /UG=Mm.86376 /LL=107058 /UG_GENE=AW987595 /UG_TITLE=expressed sequence AW987595
1418478_at	191	1065	5.56	Lmo1	LIM domain only 1				gb:NM_057173.1 /DB_XREF=gi:16975505 /GEN=Lmo1 /FEA=FLmRNA /CNT=35 /TID=Mm.12607.1 /TIER=FL+Stack /STK=23 /UG=Mm.12607 /LL=109594 /DEF=Mus musculus LIM only 1 (Lmo1), mRNA. /PROD=LIM only 1 /FL=gb:NM_057173.1
1450415_at	783	4287	5.47	Pde6a	Phosphodiesterase 6A, cGMP-specific, rod, alpha				gb:NM_008805.1 /DB_XREF=gi:6679252 /GEN=Pde6a /FEA=FLmRNA /CNT=32 /TID=Mm.1370.1 /TIER=FL /STK=1 /UG=Mm.1370 /LL=18586 /DEF=Mus musculus phosphodiesterase 6A, cGMP-specific, rod, alpha (Pde6a), mRNA. /PROD=phosphodiesterase 6A, cGMP-specific, rod, alpha /FL=gb:NM_008805.1
1437021_at	211	1142	5.41	Arl13b	ADP-ribosylation factor-like 13B				gb:AV225959 /DB_XREF=gi:16385275 /DB_XREF=AV225959 /CLONE=3830432K11 /FEA=EST /CNT=37 /TID=Mm.96833.2 /TIER=Stack /STK=29 /UG=Mm.96833 /LL=68146 /UG_GENE=C530009C10Rik /UG_TITLE=RIKEN cDNA C530009C10 gene
1437626_at	731	3880	5.31	Zfp36l2	Zinc finger protein 36, C3H type-like 2				gb:BB031791 /DB_XREF=gi:15403585 /DB_XREF=BB031791 /CLONE=5830467I20 /FEA=EST /CNT=235 /TID=Mm.28161.2 /TIER=Stack /STK=15 /UG=Mm.28161 /LL=12193 /UG_GENE=Zfp36l2 /UG_TITLE=zinc finger protein 36, C3H type-like 2
1449945_at	780	3952	5.07	Ppargc1b	Peroxisome proliferative activated receptor, gamma, coactivator 1 beta				gb:NM_133249.1 /DB_XREF=gi:18875425 /GEN=LOC170826 /FEA=FLmRNA /CNT=31 /TID=Mm.35750.1 /TIER=FL /STK=3 /UG=Mm.35750 /LL=170826 /DEF=Mus musculus PPAR gamma coactivator-1beta protein (LOC170826), mRNA. /PROD=PPAR gamma coactivator-1beta protein /FL=gb:AF453324.1 gb:NM_133249.1
1428547_at	739	3711	5.02	Nt5e	5' nucleotidase, ecto				gb:AV273591 /DB_XREF=gi:15405538 /DB_XREF=AV273591 /CLONE=4932412C08 /FEA=mRNA /CNT=48 /TID=Mm.31676.1 /TIER=Stack /STK=33 /UG=Mm.31676 /LL=74242 /UG_GENE=2210401F01Rik /UG_TITLE=RIKEN cDNA 2210401F01 gene
1448390_a_at	256	1224	4.78	Dhrs3	Dehydrogenase/reductase (SDR family) member 3				gb:NM_011303.1 /DB_XREF=gi:6755379 /GEN=Rsdr1-pending /FEA=FLmRNA /CNT=130 /TID=Mm.14063.1 /TIER=FL+Stack /STK=80 /UG=Mm.14063 /LL=20148 /DEF=Mus musculus retinal short-chain dehydrogenasereductase 1 (Rsdr1-pending), mRNA. /PROD=retinal short-chain dehydrogenasereductase 1 /FL=gb:NM_011303.1 gb:BC010972.1 gb:AF061743.1 gb:BC013540.1
1452672_at	802	3538	4.41	Thoc5	THO complex 5				gb:AK006840.1 /DB_XREF=gi:12840117 /FEA=mRNA /CNT=125 /TID=Mm.28969.1 /TIER=Stack /STK=102 /UG=Mm.28969 /LL=73404 /UG_GENE=1700060C24Rik /UG_TITLE=RIKEN cDNA 1700060C24 gene /DEF=Mus musculus adult male testis cDNA, RIKEN full-length enriched library, clone:1700060C24:homolog to PLACENTAL PROTEIN (FRAGMENT), full insert sequence.
1418029_at	951	3846	4.05	Faim	Fas apoptotic inhibitory molecule				gb:NM_011810.1 /DB_XREF=gi:6753815 /GEN=Faim /FEA=FLmRNA /CNT=60 /TID=Mm.74605.1 /TIER=FL+Stack /STK=31 /UG=Mm.74605 /LL=23873 /DEF=Mus musculus Fas apoptotic inhibitory molecule (Faim), mRNA. /PROD=Fas apoptotic inhibitory molecule /FL=gb:AF130367.1 gb:NM_011810.1
1435189_at	684	2708	3.96	Frmpd1	FERM and PDZ domain containing 1				gb:BM213356 /DB_XREF=gi:17771213 /DB_XREF=C0835C02-3 /CLONE=C0835C02 /FEA=EST /CNT=25 /TID=Mm.24783.1 /TIER=Stack /STK=19 /UG=Mm.24783 /UG_TITLE=ESTs, Highly similar to KIAA0967 protein (H.sapiens)
1428174_x_at	346	1368	3.96	Khsrp	KH-type splicing regulatory protein				gb:BQ174458 /DB_XREF=gi:20349949 /DB_XREF=UI-M-DJ2-bvy-m-01-0-UI.s1 /CLONE=UI-M-DJ2-bvy-m-01-0-UI /FEA=mRNA /CNT=108 /TID=Mm.34296.1 /TIER=Stack /STK=81 /UG=Mm.34296 /LL=70743 /UG_GENE=6330409F21Rik /UG_TITLE=RIKEN cDNA 6330409F21 gene
1423611_at	710	2794	3.93	Akp2	Alkaline phosphatase 2, liver				gb:AW319615 /DB_XREF=gi:6749159 /DB_XREF=um99d08.x1 /CLONE=IMAGE:2352879 /FEA=FLmRNA /CNT=175 /TID=Mm.1265.1 /TIER=Stack /STK=8 /UG=Mm.1265 /LL=11647 /UG_GENE=Akp2 /UG_TITLE=alkaline phosphatase 2, liver /FL=gb:J02980.1 gb:NM_007431.1
1443533_at	286	1105	3.86	Ppp2r5e	Protein phosphatase 2, regulatory subunit B (B56), epsilon isoform				gb:BM203526 /DB_XREF=gi:17758130 /DB_XREF=C0255F10-3 /CLONE=C0255F10 /FEA=EST /CNT=3 /TID=Mm.218335.1 /TIER=ConsEnd /STK=3 /UG=Mm.218335 /UG_TITLE=ESTs
1439150_x_at	580	2210	3.81	Grtp1	GH regulated TBC protein 1				gb:BB480256 /DB_XREF=gi:9397865 /DB_XREF=BB480256 /CLONE=D330045D12 /FEA=EST /CNT=11 /TID=Mm.34901.4 /TIER=Stack /STK=8 /UG=Mm.34901 /LL=66790 /UG_GENE=Grtp1 /UG_TITLE=GH regulated TBC protein 1
1417730_at	485	1801	3.72	Ext1	Exostoses (multiple) 1				gb:NM_010162.1 /DB_XREF=gi:7106308 /GEN=Ext1 /FEA=FLmRNA /CNT=92 /TID=Mm.1424.1 /TIER=FL+Stack /STK=37 /UG=Mm.1424 /LL=14042 /DEF=Mus musculus exostoses (multiple) 1 (Ext1), mRNA. /PROD=exostoses (multiple) 1 /FL=gb:NM_010162.1 gb:U78539.1 gb:BC004741.1
1434297_at	303	1130	3.72	E130304F04Rik	RIKEN cDNA E130304F04 gene				gb:BB359887 /DB_XREF=gi:16405851 /DB_XREF=BB359887 /CLONE=C030043O08 /FEA=EST /CNT=47 /TID=Mm.38058.1 /TIER=Stack /STK=36 /UG=Mm.38058 /UG_TITLE=ESTs, Weakly similar to PUTATIVE SERINETHREONINE-PROTEIN KINASE MSK (M.musculus)
1436918_at	1221	4463	3.65	BE374941	Transcribed locus				gb:BE374941 /DB_XREF=gi:9320304 /DB_XREF=601226869F1 /CLONE=IMAGE:3585137 /FEA=EST /CNT=52 /TID=Mm.103617.1 /TIER=Stack /STK=35 /UG=Mm.103617 /UG_TITLE=ESTs
1418195_at	309	1127	3.65	Galnt10	UDP-N-acetyl-alpha-D-galactosamine:polypeptide N-acetylgalactosaminyltransferase 10				gb:BG965198 /DB_XREF=gi:14352835 /DB_XREF=602830944F1 /CLONE=IMAGE:4985531 /FEA=FLmRNA /CNT=101 /TID=Mm.11360.1 /TIER=Stack /STK=22 /UG=Mm.11360 /LL=171212 /UG_GENE=Galnt9 /UG_TITLE=UDP-N-acetyl-alpha-D-galactosamine:polypeptide N-acetylgalactosaminyltransferase 9 /FL=gb:NM_134189.1 gb:BC016585.1
1448721_at	361	1309	3.62	D1Ertd622e	DNA segment, Chr 1, ERATO Doi 622, expressed				gb:NM_133825.1 /DB_XREF=gi:19527041 /GEN=AI987691 /FEA=FLmRNA /CNT=87 /TID=Mm.12309.1 /TIER=FL+Stack /STK=44 /UG=Mm.12309 /LL=98482 /DEF=Mus musculus expressed sequence AI987691 (AI987691), mRNA. /PROD=expressed sequence AI987691 /FL=gb:BC019375.1 gb:NM_133825.1
1434504_at	306	1107	3.62	Zfyve28	Zinc finger, FYVE domain containing 28	1443669_at			gb:BB132074 /DB_XREF=gi:16266442 /DB_XREF=BB132074 /CLONE=9630058O20 /FEA=EST /CNT=32 /TID=Mm.45051.1 /TIER=Stack /STK=31 /UG=Mm.45051 /UG_TITLE=ESTs, Weakly similar to R160.7.p (Caenorhabditis elegans) (C.elegans)
1460479_at	351	1266	3.61	A330094K24Rik	RIKEN cDNA A330094K24 gene				gb:AK020726.1 /DB_XREF=gi:12861400 /FEA=mRNA /CNT=4 /TID=Mm.177999.1 /TIER=ConsEnd /STK=3 /UG=Mm.177999 /LL=77093 /UG_GENE=A330094K24Rik /UG_TITLE=RIKEN cDNA A330094K24 gene /DEF=Mus musculus adult male spinal cord cDNA, RIKEN full-length enriched library, clone:A330094K24:unclassifiable transcript, full insert sequence.
1439802_at	1325	4620	3.49	Stk35	Serine/threonine kinase 35				gb:AV375248 /DB_XREF=gi:16397982 /DB_XREF=AV375248 /CLONE=9130022M19 /FEA=EST /CNT=19 /TID=Mm.44868.1 /TIER=ConsEnd /STK=6 /UG=Mm.44868 /UG_TITLE=ESTs
1425696_at	1197	4172	3.48	Txnl6	Thioredoxin-like 6				gb:BC021911.1 /DB_XREF=gi:18314459 /FEA=FLmRNA /CNT=11 /TID=Mm.213208.1 /TIER=FL /STK=1 /UG=Mm.213208 /DEF=Mus musculus, clone MGC:27601 IMAGE:4502967, mRNA, complete cds. /PROD=Unknown (protein for MGC:27601) /FL=gb:BC021911.1
1425270_at	342	1191	3.48	Kif1b	Kinesin family member 1B				gb:D17577.1 /DB_XREF=gi:407338 /FEA=FLmRNA /CNT=24 /TID=Mm.42027.2 /TIER=FL /STK=3 /UG=Mm.42027 /LL=16561 /UG_GENE=Kif1b /DEF=Mouse mRNA for kinesin-like protein (Kif1b), complete cds. /PROD=Kif1b /FL=gb:D17577.1
1437003_at	376	1297	3.45	BB323930	Transcribed locus				gb:BB323930 /DB_XREF=gi:16403486 /DB_XREF=BB323930 /CLONE=B430101L16 /FEA=EST /CNT=35 /TID=Mm.17706.1 /TIER=Stack /STK=30 /UG=Mm.17706 /UG_TITLE=ESTs
1454729_at	412	1402	3.41	Tmem108	Transmembrane protein 108				gb:BB293313 /DB_XREF=gi:16401667 /DB_XREF=BB293313 /CLONE=B130017P16 /FEA=EST /CNT=73 /TID=Mm.29920.1 /TIER=Stack /STK=57 /UG=Mm.29920 /LL=81907 /UG_GENE=R74726 /UG_TITLE=cDNA sequence, R74726
1436205_at	1020	3395	3.33	Nfasc	Transcribed locus	1459357_at			gb:BE692021 /DB_XREF=gi:10079645 /DB_XREF=uv70e03.x1 /CLONE=IMAGE:3412540 /FEA=EST /CNT=23 /TID=Mm.37703.1 /TIER=Stack /STK=10 /UG=Mm.37703 /UG_TITLE=ESTs
1458506_at	1279	4230	3.31	Gm1582	Gene model 1582, (NCBI)				gb:BI735399 /DB_XREF=gi:15712412 /DB_XREF=603356886F1 /CLONE=IMAGE:5364237 /FEA=EST /CNT=6 /TID=Mm.206197.1 /TIER=ConsEnd /STK=2 /UG=Mm.206197 /UG_TITLE=ESTs
1454684_at	1147	3702	3.23	Bbs7	Bardet-Biedl syndrome 7				gb:BG074932 /DB_XREF=gi:12557501 /DB_XREF=H3141B06-3 /CLONE=H3141B06 /FEA=EST /CNT=74 /TID=Mm.50655.1 /TIER=Stack /STK=73 /UG=Mm.50655 /UG_TITLE=ESTs
1439371_x_at	1281	4116	3.21	Timm44	Translocase of inner mitochondrial membrane 44				gb:AV102008 /DB_XREF=gi:5249556 /DB_XREF=AV102008 /CLONE=2410085E15 /FEA=EST /CNT=8 /TID=Mm.195249.2 /TIER=Stack /STK=8 /UG=Mm.195249 /LL=21856 /UG_GENE=Timm44 /UG_TITLE=translocator of inner mitochondrial membrane 44
1439856_at	353	1131	3.2	Acvr2b	Activin receptor IIB				gb:BM199465 /DB_XREF=gi:17752309 /DB_XREF=C0459H06-3 /CLONE=C0459H06 /FEA=EST /CNT=9 /TID=Mm.213446.1 /TIER=ConsEnd /STK=6 /UG=Mm.213446 /UG_TITLE=ESTs
1426816_at	751	2391	3.19	Ccdc64	Coiled-coil domain containing 64				gb:BC024804.1 /DB_XREF=gi:19354444 /FEA=mRNA /CNT=76 /TID=Mm.38300.1 /TIER=Stack /STK=59 /UG=Mm.38300 /DEF=Mus musculus, similar to supported by EST AA121608 (NID:g1679223) and Genscan, clone IMAGE:5361390, mRNA, partial cds. /PROD=similar to supported by EST AA121608(NID:g1679223) and Genscan
1415870_at	674	2113	3.13	Calu	Calumenin				gb:NM_007594.1 /DB_XREF=gi:6680839 /GEN=Calu /FEA=FLmRNA /CNT=355 /TID=Mm.7515.1 /TIER=FL+Stack /STK=191 /UG=Mm.7515 /LL=12321 /DEF=Mus musculus calumenin (Calu), mRNA. /PROD=calumenin /FL=gb:U81829.1 gb:NM_007594.1
1455543_at	1130	3527	3.12	Klhl18	Kelch-like 18 (Drosophila)				gb:AW545966 /DB_XREF=gi:7191433 /DB_XREF=L0002D11-3 /CLONE=L0002D11 /FEA=EST /CNT=32 /TID=Mm.41744.1 /TIER=Stack /STK=11 /UG=Mm.41744 /LL=102778 /UG_GENE=AW545966 /UG_TITLE=expressed sequence AW545966
1436102_at	743	2300	3.1	Sec22c	SEC22 vesicle trafficking protein-like C (S. cerevisiae)				gb:BB425408 /DB_XREF=gi:16423594 /DB_XREF=BB425408 /CLONE=C530046H07 /FEA=EST /CNT=15 /TID=Mm.31421.1 /TIER=Stack /STK=11 /UG=Mm.31421 /UG_TITLE=ESTs
1443306_at	389	1193	3.07	BB380163	0 day neonate cerebellum cDNA, RIKEN full-length enriched library, clone:C230004E12 product:hypothetical protein, full insert sequence				gb:BB380163 /DB_XREF=gi:16407890 /DB_XREF=BB380163 /CLONE=C230004E12 /FEA=EST /CNT=3 /TID=Mm.80674.1 /TIER=ConsEnd /STK=3 /UG=Mm.80674 /UG_TITLE=ESTs
1417630_at	427	1298	3.04	Mknk1	MAP kinase-interacting serine/threonine kinase 1				gb:BC021369.1 /DB_XREF=gi:18204704 /FEA=FLmRNA /CNT=65 /TID=Mm.206467.1 /TIER=FL+Stack /STK=40 /UG=Mm.206467 /LL=17346 /UG_GENE=Mknk1 /DEF=Mus musculus, MAP kinase-interacting serinethreonine kinase 1, clone MGC:29099 IMAGE:5030044, mRNA, complete cds. /PROD=MAP kinase-interacting serinethreonine kinase1 /FL=gb:NM_021461.1 gb:BC021369.1
1424312_at	1331	4034	3.03	Adipor1	Adiponectin receptor 1	1439017_x_at	1451311_a_at		gb:BG065410 /DB_XREF=gi:12547973 /DB_XREF=H3030G10-3 /CLONE=H3030G10 /FEA=FLmRNA /CNT=192 /TID=Mm.205010.1 /TIER=Stack /STK=9 /UG=Mm.205010 /LL=72674 /UG_GENE=2810031L11Rik /UG_TITLE=RIKEN cDNA 2810031L11 gene /FL=gb:BC014875.1
1416825_at	437	1314	3	Snta1	Syntrophin, acidic 1				gb:NM_009228.1 /DB_XREF=gi:6678056 /GEN=Snta1 /FEA=FLmRNA /CNT=95 /TID=Mm.1541.1 /TIER=FL+Stack /STK=68 /UG=Mm.1541 /LL=20648 /DEF=Mus musculus syntrophin, acidic 1 (Snta1), mRNA. /PROD=syntrophin, acidic 1 /FL=gb:BC018546.1 gb:U00677.1 gb:NM_009228.1
1424530_at	379	1134	3	Sec14l2	SEC14-like 2 (S. cerevisiae)				gb:BC005759.1 /DB_XREF=gi:13543183 /FEA=FLmRNA /CNT=81 /TID=Mm.28994.1 /TIER=FL+Stack /STK=26 /UG=Mm.28994 /DEF=Mus musculus, clone MGC:6302 IMAGE:2655022, mRNA, complete cds. /PROD=Unknown (protein for MGC:6302) /FL=gb:BC005759.1
1442190_at	15	753	51.13	BI736087	PREDICTED: Mus musculus hypothetical protein LOC627272 (LOC627272), mRNA				gb:BI736087 /DB_XREF=gi:15713100 /DB_XREF=603359238F1 /CLONE=IMAGE:5366529 /FEA=EST /CNT=6 /TID=Mm.35149.1 /TIER=ConsEnd /STK=3 /UG=Mm.35149 /UG_TITLE=ESTs, Weakly similar to POL2 MOUSE RETROVIRUS-RELATED POL POLYPROTEIN (M.musculus)
1449393_at	8	265	33.64	Sh2d1a	SH2 domain protein 1A				gb:NM_011364.1 /DB_XREF=gi:6755493 /GEN=Sh2d1a /FEA=FLmRNA /CNT=19 /TID=Mm.20880.1 /TIER=FL+Stack /STK=12 /UG=Mm.20880 /LL=20400 /DEF=Mus musculus SH2 domain protein 1A (Sh2d1a), mRNA. /PROD=SH2 domain protein 1A /FL=gb:AF097633.1 gb:AF097632.1 gb:NM_011364.1 gb:AF072903.1
1453009_at	8	252	31.02	Cpm	Carboxypeptidase M				gb:AK004327.1 /DB_XREF=gi:12835470 /FEA=mRNA /CNT=27 /TID=Mm.35372.1 /TIER=Stack /STK=13 /UG=Mm.35372 /LL=66207 /UG_GENE=1110060I01Rik /UG_TITLE=RIKEN cDNA 1110060I01 gene /DEF=Mus musculus 18 days embryo whole body cDNA, RIKEN full-length enriched library, clone:1110060I01:unclassifiable, full insert sequence.
1430159_at	15	262	17.08	5830408C22Rik	RIKEN cDNA 5830408C22 gene				gb:BF658932 /DB_XREF=gi:11924066 /DB_XREF=maa99a03.x1 /CLONE=IMAGE:3824908 /FEA=mRNA /CNT=11 /TID=Mm.105344.1 /TIER=ConsEnd /STK=3 /UG=Mm.105344 /LL=74744 /UG_GENE=5830408C22Rik /UG_TITLE=RIKEN cDNA 5830408C22 gene
1460470_at	11	149	13.93	Acoxl	Acyl-Coenzyme A oxidase-like				gb:AK004775.1 /DB_XREF=gi:12836207 /FEA=mRNA /CNT=15 /TID=Mm.45809.1 /TIER=ConsEnd /STK=6 /UG=Mm.45809 /LL=74121 /UG_GENE=1200014P05Rik /UG_TITLE=RIKEN cDNA 1200014P05 gene /DEF=Mus musculus adult male lung cDNA, RIKEN full-length enriched library, clone:1200014P05:homolog to CDNA FLJ11042 FIS, CLONE PLACE1004428, WEAKLY SIMILAR TO PRISTANOYL- COA OXIDASE (EC 1.3.3.-), full insert sequence.
1437371_at	42	526	12.67	9930021J17Rik	RIKEN cDNA 9930021J17 gene				gb:BB008528 /DB_XREF=gi:16257098 /DB_XREF=BB008528 /CLONE=4732483E04 /FEA=EST /CNT=30 /TID=Mm.49448.1 /TIER=Stack /STK=19 /UG=Mm.49448 /UG_TITLE=ESTs
1443552_at	25	313	12.6	E230008N13Rik	RIKEN cDNA E230008N13 gene				gb:BM932485 /DB_XREF=gi:19391637 /DB_XREF=UI-M-BH2.1-ape-e-11-0-UI.r1 /CLONE=UI-M-BH2.1-ape-e-11-0-UI /FEA=EST /CNT=3 /TID=Mm.54220.1 /TIER=ConsEnd /STK=3 /UG=Mm.54220 /UG_TITLE=ESTs, Weakly similar to KIAA1529 protein (H.sapiens)
1440370_at	66	759	11.58	Abca13	ATP-binding cassette, sub-family A (ABC1), member 13	1446715_at			gb:BB277120 /DB_XREF=gi:16400938 /DB_XREF=BB277120 /CLONE=A930002G16 /FEA=EST /CNT=7 /TID=Mm.39270.1 /TIER=ConsEnd /STK=5 /UG=Mm.39270 /LL=103890 /UG_GENE=AI956815 /UG_TITLE=expressed sequence AI956815
1427388_at	67	703	10.43	Lrrc2	Leucine rich repeat containing 2	1453628_s_at			gb:AJ428068.1 /DB_XREF=gi:18250731 /GEN=Lrrc2 /FEA=mRNA /CNT=16 /TID=Mm.38410.1 /TIER=ConsEnd /STK=2 /UG=Mm.38410 /LL=75733 /DEF=Mus musculus mRNA for leucine-rich repeat-containing 2 protein (Lrrc2 gene). /PROD=leucine-rich repeat-containing 2 protein
1419694_at	20	192	9.87	St8sia1	ST8 alpha-N-acetyl-neuraminide alpha-2,8-sialyltransferase 1	1455695_at	1419695_at		gb:NM_011374.1 /DB_XREF=gi:6755515 /GEN=Siat8a /FEA=FLmRNA /CNT=30 /TID=Mm.12826.1 /TIER=FL /STK=7 /UG=Mm.12826 /LL=20449 /DEF=Mus musculus sialyltransferase 8 (alpha-2, 8-sialytransferase) A (Siat8a), mRNA. /PROD=sialyltransferase 8 (alpha-2,8-sialytransferase) A /FL=gb:NM_011374.1 gb:L38677.1
1421698_a_at	49	479	9.77	Col19a1	Procollagen, type XIX, alpha 1				gb:NM_007733.1 /DB_XREF=gi:6680965 /GEN=Col19a1 /FEA=FLmRNA /CNT=2 /TID=Mm.6252.1 /TIER=FL /STK=2 /UG=Mm.6252 /LL=12823 /DEF=Mus musculus procollagen, type XIX, alpha 1 (Col19a1), mRNA. /PROD=procollagen, type XIX, alpha 1 /FL=gb:AB000636.1 gb:NM_007733.1
1449161_at	80	770	9.69	Edn2	Endothelin 2				gb:NM_007902.1 /DB_XREF=gi:6681264 /GEN=Edn2 /FEA=FLmRNA /CNT=24 /TID=Mm.1366.1 /TIER=FL+Stack /STK=21 /UG=Mm.1366 /LL=13615 /DEF=Mus musculus endothelin 2 (Edn2), mRNA. /PROD=endothelin 2 /FL=gb:NM_007902.1
1453264_at	51	407	7.93	Marveld3	MARVEL (membrane-associating) domain containing 3				gb:AK007346.1 /DB_XREF=gi:12840834 /FEA=mRNA /CNT=30 /TID=Mm.31998.1 /TIER=Stack /STK=9 /UG=Mm.31998 /LL=73608 /UG_GENE=1810006A16Rik /UG_TITLE=RIKEN cDNA 1810006A16 gene /DEF=Mus musculus 10 day old male pancreas cDNA, RIKEN full-length enriched library, clone:1810006A16:hypothetical protein, full insert sequence.
1450997_at	55	409	7.45	Stk17b	Serine/threonine kinase 17b (apoptosis-inducing)				gb:AV173139 /DB_XREF=gi:16383725 /DB_XREF=AV173139 /CLONE=4432404O09 /FEA=FLmRNA /CNT=149 /TID=Mm.25559.1 /TIER=Stack /STK=20 /UG=Mm.25559 /LL=98267 /UG_GENE=AI120141 /UG_TITLE=expressed sequence AI120141 /FL=gb:BC006579.1 gb:NM_133810.1
1440250_at	45	331	7.3	Col4a4	Procollagen, type IV, alpha 4				gb:BM121658 /DB_XREF=gi:17105426 /DB_XREF=L0500B06-3 /CLONE=L0500B06 /FEA=EST /CNT=8 /TID=Mm.107258.1 /TIER=ConsEnd /STK=5 /UG=Mm.107258 /UG_TITLE=ESTs
1442304_at	20	131	6.66	BB520468	16 days neonate heart cDNA, RIKEN full-length enriched library, clone:D830044D09 product:unclassifiable, full insert sequence				gb:BB520468 /DB_XREF=gi:16443408 /DB_XREF=BB520468 /CLONE=D830044D09 /FEA=EST /CNT=5 /TID=Mm.74650.1 /TIER=ConsEnd /STK=3 /UG=Mm.74650 /UG_TITLE=ESTs
1422986_at	87	580	6.64	Esrrb	Estrogen related receptor, beta	1441921_x_at	1436926_at		gb:NM_011934.1 /DB_XREF=gi:13937382 /GEN=Esrrb /FEA=FLmRNA /CNT=13 /TID=Mm.90048.1 /TIER=FL /STK=0 /UG=Mm.90048 /LL=26380 /DEF=Mus musculus estrogen related receptor, beta (Esrrb), mRNA. /PROD=estrogen related receptor, beta /FL=gb:NM_011934.1
1453143_at	35	215	6.21	4921509F24Rik	RIKEN cDNA 4921509F24 gene				gb:AK014852.1 /DB_XREF=gi:12852935 /FEA=mRNA /CNT=23 /TID=Mm.78118.1 /TIER=Stack /STK=21 /UG=Mm.78118 /LL=70893 /UG_GENE=4921509F24Rik /UG_TITLE=RIKEN cDNA 4921509F24 gene /DEF=Mus musculus adult male testis cDNA, RIKEN full-length enriched library, clone:4921509F24:similar to BETA-GALACTOSIDASE PRECURSOR (EC 3.2.1.23) (LACTASE) (ACID BETA- GALACTOSIDASE), full insert sequence.
1431631_at	45	277	6.11	Zbtb7c	Zinc finger and BTB domain containing 7C				gb:AK013712.1 /DB_XREF=gi:12851180 /FEA=mRNA /CNT=2 /TID=Mm.70660.1 /TIER=ConsEnd /STK=1 /UG=Mm.70660 /LL=73009 /UG_GENE=2900057B20Rik /UG_TITLE=RIKEN cDNA 2900057B20 gene /DEF=Mus musculus adult male hippocampus cDNA, RIKEN full-length enriched library, clone:2900057B20:unclassifiable transcript, full insert sequence.
1442686_at	70	416	5.98	Dpf3	D4, zinc and double PHD fingers, family 3				gb:AI849127 /DB_XREF=gi:5493033 /DB_XREF=UI-M-AJ1-agy-a-11-0-UI.s1 /CLONE=UI-M-AJ1-agy-a-11-0-UI /FEA=EST /CNT=4 /TID=Mm.101639.1 /TIER=ConsEnd /STK=3 /UG=Mm.101639 /UG_TITLE=ESTs
1440560_at	76	439	5.76	Ypel2	Yippee-like 2 (Drosophila)				gb:AU067691 /DB_XREF=gi:4968428 /DB_XREF=AU067691 /CLONE=MNCb-0457 /FEA=EST /CNT=5 /TID=Mm.120255.1 /TIER=ConsEnd /STK=5 /UG=Mm.120255 /UG_TITLE=ESTs
1435639_at	49	275	5.66	2610528A11Rik	RIKEN cDNA 2610528A11 gene				gb:BF580962 /DB_XREF=gi:11654674 /DB_XREF=602100664F1 /CLONE=IMAGE:4224230 /FEA=EST /CNT=53 /TID=Mm.24660.1 /TIER=Stack /STK=14 /UG=Mm.24660 /LL=70045 /UG_GENE=2610528A11Rik /UG_TITLE=RIKEN cDNA 2610528A11 gene
1421027_a_at	120	675	5.61	Mef2c	Myocyte enhancer factor 2C	1424852_at	1421028_a_at	1451507_at	gb:NM_025282.1 /DB_XREF=gi:13384623 /GEN=Mef2c /FEA=FLmRNA /CNT=41 /TID=Mm.24001.1 /TIER=FL /STK=2 /UG=Mm.24001 /LL=17260 /DEF=Mus musculus myocyte enhancer factor 2C (Mef2c), mRNA. /PROD=myocyte enhancer factor 2C /FL=gb:NM_025282.1
1456982_at	58	322	5.58	Mrps27	Mitochondrial ribosomal protein S27				gb:BB043852 /DB_XREF=gi:16258805 /DB_XREF=BB043852 /CLONE=6030478L11 /FEA=EST /CNT=6 /TID=Mm.131481.1 /TIER=ConsEnd /STK=6 /UG=Mm.131481 /UG_TITLE=ESTs
1418726_a_at	24	129	5.35	Tnnt2	Troponin T2, cardiac	1424967_x_at			gb:NM_011619.1 /DB_XREF=gi:6755842 /GEN=Tnnt2 /FEA=FLmRNA /CNT=27 /TID=Mm.632.1 /TIER=FL+Stack /STK=19 /UG=Mm.632 /LL=21956 /DEF=Mus musculus troponin T2, cardiac (Tnnt2), mRNA. /PROD=troponin T2, cardiac /FL=gb:NM_011619.1 gb:L47600.1
1441969_at	143	745	5.23	Trim36	Tripartite motif-containing 36				gb:BM933729 /DB_XREF=gi:19392881 /DB_XREF=UI-M-BZ1-bjq-h-08-0-UI.r2 /CLONE=UI-M-BZ1-bjq-h-08-0-UI /FEA=EST /CNT=18 /TID=Mm.206259.1 /TIER=ConsEnd /STK=3 /UG=Mm.206259 /LL=28105 /UG_GENE=D18Wsu100e /UG_TITLE=DNA segment, Chr 18, Wayne State University 100, expressed
1418946_at	40	206	5.14	St3gal1	ST3 beta-galactoside alpha-2,3-sialyltransferase 1				gb:NM_009177.1 /DB_XREF=gi:6677956 /GEN=Siat4a /FEA=FLmRNA /CNT=24 /TID=Mm.6284.1 /TIER=FL+Stack /STK=16 /UG=Mm.6284 /LL=20442 /DEF=Mus musculus sialyltransferase 4A (beta-galactosidase alpha-2,3-sialytransferase) (Siat4a), mRNA. /PROD=sialyltransferase 4 /FL=gb:NM_009177.1
1429099_at	105	538	5.12	1110051B16Rik	RIKEN cDNA 1110051B16 gene	1445710_x_at			gb:AK004227.1 /DB_XREF=gi:12835334 /FEA=mRNA /CNT=18 /TID=Mm.23498.1 /TIER=Stack /STK=12 /UG=Mm.23498 /LL=68798 /UG_GENE=1110051B16Rik /UG_TITLE=RIKEN cDNA 1110051B16 gene /DEF=Mus musculus 18 days embryo whole body cDNA, RIKEN full-length enriched library, clone:1110051B16:unclassifiable transcript, full insert sequence.
1418589_a_at	74	376	5.08	Mlf1	Myeloid leukemia factor 1				gb:AF100171.1 /DB_XREF=gi:4106525 /GEN=Mlf1 /FEA=FLmRNA /CNT=42 /TID=Mm.10414.1 /TIER=FL+Stack /STK=21 /UG=Mm.10414 /LL=17349 /DEF=Mus musculus myelodysplasiamyeloid leukemia factor 1 (Mlf1) mRNA, complete cds. /PROD=myelodysplasiamyeloid leukemia factor 1 /FL=gb:AF009515.1 gb:NM_010801.1 gb:AF100171.1
Nrl-upregulated genes
Affy_ID	Nrl_ave	B6_ave	B6_ave/Nrl_ave	Gene symbol	Gene name	Additional Affy_IDs		Additional gene information
1450779_at	5796	118	0.02	Fabp7	Fatty acid binding protein 7, brain			gb:NM_021272.1 /DB_XREF=gi:10946571 /GEN=Fabp7 /FEA=FLmRNA /CNT=58 /TID=Mm.3644.1 /TIER=FL+Stack /STK=9 /UG=Mm.3644 /LL=12140 /DEF=Mus musculus fatty acid binding protein 7, brain (Fabp7), mRNA. /PROD=brain lipid binding protein /FL=gb:NM_021272.1
1418552_at	8345	268	0.03	Opn1sw	Opsin 1 (cone pigments), short-wave-sensitive (color blindness, tritan)	1449132_at		gb:BC026021.1 /DB_XREF=gi:19683961 /FEA=FLmRNA /CNT=42 /TID=Mm.56987.1 /TIER=FL /STK=1 /UG=Mm.56987 /LL=12057 /UG_GENE=Opn1sw /DEF=Mus musculus, opsin 1 (cone pigments), short-wave-sensitive (color blindness, tritan), clone MGC:28865 IMAGE:4511808, mRNA, complete cds. /PROD=opsin 1 (cone pigments), short-wave-sensitive(color blindness, tritan) /FL=gb:BC026021.1 gb:AF190670.1 gb:U49720.1 gb:NM_007…
1450492_at	7755	520	0.07	Cngb3	Cyclic nucleotide gated channel beta 3			gb:NM_013927.1 /DB_XREF=gi:8393163 /GEN=Cngb3 /FEA=FLmRNA /CNT=7 /TID=Mm.103575.1 /TIER=FL /STK=1 /UG=Mm.103575 /LL=30952 /DEF=Mus musculus cyclic nucleotide gated channel beta 3 (Cngb3), mRNA. /PROD=cyclic nucleotide gated channel beta 3 /FL=gb:NM_013927.1
1421780_a_at	8342	754	0.09	Cabp5	Calcium binding protein 5	1451826_at		gb:NM_013877.1 /DB_XREF=gi:7304942 /GEN=Cabp5 /FEA=FLmRNA /CNT=2 /TID=Mm.103669.1 /TIER=FL /STK=2 /UG=Mm.103669 /LL=29865 /DEF=Mus musculus calcium binding protein 5 (Cabp5), mRNA. /PROD=calcium binding protein 5 /FL=gb:AF169161.1 gb:NM_013877.1
1449501_a_at	9803	1168	0.12	Gzmm	Granzyme M (lymphocyte met-ase 1)			gb:NM_008504.1 /DB_XREF=gi:6678699 /GEN=Gzmm /FEA=FLmRNA /CNT=10 /TID=Mm.22302.1 /TIER=FL+Stack /STK=9 /UG=Mm.22302 /LL=16904 /DEF=Mus musculus granzyme M (lymphocyte met-ase 1) (Gzmm), mRNA. /PROD=granzyme M (lymphocyte met-ase 1) /FL=gb:AB015728.1 gb:NM_008504.1 gb:L76741.1
1450830_a_at	17939	2386	0.13	Pde6c	Phosphodiesterase 6C, cGMP specific, cone, alpha prime			gb:NM_033614.1 /DB_XREF=gi:15809035 /GEN=Pde6c /FEA=FLmRNA /CNT=6 /TID=Mm.196971.1 /TIER=FL /STK=0 /UG=Mm.196971 /LL=110855 /DEF=Mus musculus phosphodiesterase 6C, cGMP specific, cone, alpha prime (Pde6c), mRNA. /PROD=phosphodiesterase 6C, cGMP specific, cone, alphaprime /FL=gb:AF411063.1 gb:NM_033614.1
1423420_at	9023	1385	0.15	Adrb1	Adrenergic receptor, beta 1			gb:AK018378.1 /DB_XREF=gi:12858051 /GEN=Adrb1 /FEA=FLmRNA /CNT=61 /TID=Mm.46797.1 /TIER=Stack /STK=42 /UG=Mm.46797 /LL=11554 /UG_TITLE=adrenergic receptor, beta 1 /DEF=Mus musculus 16 days embryo lung cDNA, RIKEN full-length enriched library, clone:8430404D20:adrenergic receptor, beta 1, full insert sequence. /FL=gb:NM_007419.1
1425232_x_at	14598	2351	0.16	Arr3	Arrestin 3, retinal	1450329_a_at		gb:BC017145.1 /DB_XREF=gi:16877824 /FEA=FLmRNA /CNT=9 /TID=Mm.156960.2 /TIER=FL /STK=4 /UG=Mm.156960 /LL=170735 /UG_GENE=Arr3 /DEF=Mus musculus, clone MGC:28831 IMAGE:4506006, mRNA, complete cds. /PROD=Unknown (protein for MGC:28831) /FL=gb:BC017145.1
1424699_at	12675	1966	0.16	4921511K06Rik	RIKEN cDNA 4921511K06 gene			gb:BC006583.1 /DB_XREF=gi:13879231 /FEA=FLmRNA /CNT=43 /TID=Mm.152589.1 /TIER=FL+Stack /STK=19 /UG=Mm.152589 /DEF=Mus musculus, Similar to hypothetical protein DKFZp434G156, clone MGC:8047 IMAGE:3587121, mRNA, complete cds. /PROD=Similar to hypothetical protein DKFZp434G156 /FL=gb:BC006583.1
1442160_at	9234	1703	0.18	7530404M11Rik	RIKEN cDNA 7530404M11 gene			gb:AV360034 /DB_XREF=gi:16397431 /DB_XREF=AV360034 /CLONE=7530404M11 /FEA=EST /CNT=7 /TID=Mm.192144.1 /TIER=ConsEnd /STK=3 /UG=Mm.192144 /UG_TITLE=ESTs
1449482_at	5576	990	0.18	Hist3h2ba	Histone 3, H2ba			gb:NM_030082.1 /DB_XREF=gi:13386451 /GEN=1500011O09Rik /FEA=FLmRNA /CNT=23 /TID=Mm.28022.1 /TIER=FL+Stack /STK=9 /UG=Mm.28022 /LL=78303 /DEF=Mus musculus RIKEN cDNA 1500011O09 gene (1500011O09Rik), mRNA. /PROD=RIKEN cDNA 1500011O09 /FL=gb:NM_030082.1
1449421_a_at	14364	2914	0.2	Kcne2	Potassium voltage-gated channel, Isk-related subfamily, gene 2			gb:NM_134110.1 /DB_XREF=gi:19882204 /GEN=2200002I16Rik /FEA=FLmRNA /CNT=17 /TID=Mm.156736.1 /TIER=FL+Stack /STK=11 /UG=Mm.156736 /LL=106387 /DEF=Mus musculus RIKEN cDNA 2200002I16 gene (2200002I16Rik), mRNA. /PROD=minK-related peptide 1 /FL=gb:NM_134110.1
1453063_at	9475	2026	0.21	Cltb	Clathrin, light polypeptide (Lcb)	1460740_at	1456797_at	gb:AK009844.1 /DB_XREF=gi:12844890 /FEA=mRNA /CNT=119 /TID=Mm.36879.1 /TIER=Stack /STK=30 /UG=Mm.36879 /LL=74325 /UG_GENE=Cltb /UG_TITLE=clathrin, light polypeptide (Lcb) /DEF=Mus musculus adult male tongue cDNA, RIKEN full-length enriched library, clone:2310046E19:homolog to CLATHRIN LIGHT CHAIN B (LCB), full insert sequence.
1422907_at	29421	6558	0.22	Gnat2	Guanine nucleotide binding protein, alpha transducing 2			gb:NM_008141.1 /DB_XREF=gi:6680042 /GEN=Gnat2 /FEA=FLmRNA /CNT=25 /TID=Mm.4805.1 /TIER=FL+Stack /STK=8 /UG=Mm.4805 /LL=14686 /DEF=Mus musculus guanine nucleotide binding protein, alpha transducing 2 (Gnat2), mRNA. /PROD=guanine nucleotide binding protein, alphatransducing 2 /FL=gb:NM_008141.1 gb:BC016272.1 gb:L10666.1
1421116_a_at	13133	3003	0.23	Rtn4	Reticulon 4			gb:NM_024226.1 /DB_XREF=gi:13195647 /GEN=Rtn4 /FEA=FLmRNA /CNT=15 /TID=Mm.220966.1 /TIER=FL /STK=2 /UG=Mm.220966 /LL=68585 /DEF=Mus musculus reticulon 4 (Rtn4), mRNA. /PROD=reticulon 4 /FL=gb:NM_024226.1 gb:AF326337.1
1450080_at	9245	2274	0.25	Cxx1c	CAAX box 1 homolog C (human)			gb:NM_028375.1 /DB_XREF=gi:13386305 /GEN=2900027G03Rik /FEA=FLmRNA /CNT=29 /TID=Mm.158897.1 /TIER=FL /STK=2 /UG=Mm.158897 /LL=72865 /DEF=Mus musculus RIKEN cDNA 2900027G03 gene (2900027G03Rik), mRNA. /PROD=RIKEN cDNA 2900027G03 /FL=gb:NM_028375.1
1450765_a_at	23562	6372	0.27	Pde6h	Phosphodiesterase 6H, cGMP-specific, cone, gamma	1450766_at		gb:NM_023898.1 /DB_XREF=gi:12963860 /GEN=Pde6h /FEA=FLmRNA /CNT=14 /TID=Mm.138001.1 /TIER=FL+Stack /STK=11 /UG=Mm.138001 /LL=78600 /DEF=Mus musculus phosphodiesterase 6H, cGMP-specific, cone, gamma (Pde6h), mRNA. /PROD=phosphodiesterase 6H, cGMP-specific, cone,gamma /FL=gb:AF190929.1 gb:NM_023898.1
1423368_at	8323	2257	0.27	Laptm4a	Lysosomal-associated protein transmembrane 4A			gb:BI695636 /DB_XREF=gi:15658265 /DB_XREF=603344769F1 /CLONE=IMAGE:5372632 /FEA=FLmRNA /CNT=449 /TID=Mm.30071.1 /TIER=Stack /STK=10 /UG=Mm.30071 /LL=17775 /UG_GENE=Laptm4a /UG_TITLE=lysosomal-associated protein transmembrane 4A /FL=gb:U34259.1 gb:NM_008640.1
1418529_at	7236	1946	0.27	Osgep	O-sialoglycoprotein endopeptidase			gb:NM_133676.1 /DB_XREF=gi:19526831 /GEN=1500019L24Rik /FEA=FLmRNA /CNT=58 /TID=Mm.29642.1 /TIER=FL+Stack /STK=22 /UG=Mm.29642 /LL=66246 /DEF=Mus musculus RIKEN cDNA 1500019L24 gene (1500019L24Rik), mRNA. /PROD=RIKEN cDNA 1500019L24 /FL=gb:BC002296.1 gb:NM_133676.1
1425590_s_at	16164	4572	0.28	Aipl1	Aryl hydrocarbon receptor-interacting protein-like 1			gb:AF296412.1 /DB_XREF=gi:15022494 /GEN=Aipl1 /FEA=FLmRNA /CNT=14 /TID=Mm.95707.1 /TIER=FL /STK=1 /UG=Mm.95707 /LL=114230 /DEF=Mus musculus aryl-hydrocarbon interacting protein-like 1 (Aipl1) mRNA, complete cds. /PROD=aryl-hydrocarbon interacting protein-like 1 /FL=gb:AF296412.1
1429146_at	5086	1424	0.28	Gas2	Growth arrest specific 2	1453049_at		gb:AV029890 /DB_XREF=gi:16356541 /DB_XREF=AV029890 /CLONE=1500010A16 /FEA=mRNA /CNT=76 /TID=Mm.41279.1 /TIER=Stack /STK=10 /UG=Mm.41279 /LL=75744 /UG_GENE=6620401M08Rik /UG_TITLE=RIKEN cDNA 6620401M08 gene
1421990_at	6437	1866	0.29	Syt1	Synaptotagmin I	1431191_a_at		gb:NM_009306.1 /DB_XREF=gi:6678196 /GEN=Syt1 /FEA=FLmRNA /CNT=17 /TID=Mm.5101.1 /TIER=FL /STK=1 /UG=Mm.5101 /LL=20979 /DEF=Mus musculus synaptotagmin 1 (Syt1), mRNA. /PROD=synaptotagmin 1 /FL=gb:NM_009306.1
1424402_at	5870	1714	0.29	Rufy3	RUN and FYVE domain containing 3			gb:BC017648.1 /DB_XREF=gi:17160983 /FEA=FLmRNA /CNT=88 /TID=Mm.37819.1 /TIER=FL+Stack /STK=34 /UG=Mm.37819 /LL=70731 /UG_GENE=6330416M07Rik /DEF=Mus musculus, RIKEN cDNA 6330416M07 gene, clone MGC:28992 IMAGE:4527858, mRNA, complete cds. /PROD=RIKEN cDNA 6330416M07 gene /FL=gb:BC017648.1
1421889_a_at	7164	2264	0.32	Aplp2	Amyloid beta (A4) precursor-like protein 2			gb:M97216.1 /DB_XREF=gi:515628 /FEA=FLmRNA /CNT=109 /TID=Mm.19133.1 /TIER=FL+Stack /STK=10 /UG=Mm.19133 /LL=11804 /UG_GENE=Aplp2 /DEF=Mus musculus DNA-binding protein mRNA, complete cds. /PROD=DNA-binding protein /FL=gb:M97216.1 gb:NM_009691.1
1425702_a_at	5164	1805	0.35	Enpp5	Ectonucleotide pyrophosphatase/phosphodiesterase 5			gb:BC011294.1 /DB_XREF=gi:15030092 /FEA=FLmRNA /CNT=10 /TID=Mm.30145.2 /TIER=FL /STK=1 /UG=Mm.30145 /LL=83965 /UG_GENE=Enpp5 /DEF=Mus musculus, ectonucleotide pyrophosphatasephosphodiesterase 5, clone MGC:18983 IMAGE:4010326, mRNA, complete cds. /PROD=ectonucleotide pyrophosphatasephosphodiesterase5 /FL=gb:BC011294.1
1427470_s_at	5891	2136	0.36	Napb	N-ethylmaleimide sensitive fusion protein attachment protein beta	1452444_at		gb:AU067119 /DB_XREF=gi:4967856 /DB_XREF=AU067119 /CLONE=MNCb-2973 /FEA=mRNA /CNT=21 /TID=Mm.4937.1 /TIER=ConsEnd /STK=0 /UG=Mm.4937 /LL=17957 /UG_GENE=Napb /UG_TITLE=N-ethylmaleimide sensitive fusion protein attachment protein beta
1439443_x_at	11562	4328	0.37	Tkt	Transketolase	1451015_at		gb:AV103412 /DB_XREF=gi:5250960 /DB_XREF=AV103412 /CLONE=2500002P17 /FEA=EST /CNT=8 /TID=Mm.154387.6 /TIER=Stack /STK=8 /UG=Mm.154387 /LL=21881 /UG_GENE=Tkt /UG_TITLE=transketolase
1435865_at	10082	3733	0.37	Hist3h2a	Histone 3, H2a	1435866_s_at	1455712_at	gb:AV297651 /DB_XREF=gi:16392970 /DB_XREF=AV297651 /CLONE=5730450G06 /FEA=EST /CNT=50 /TID=Mm.219659.2 /TIER=Stack /STK=12 /UG=Mm.219659 /LL=15267 /UG_GENE=Hist2 /UG_TITLE=histone gene complex 2
1440962_at	6614	2423	0.37	Slc8a3	Solute carrier family 8 (sodium/calcium exchanger), member 3	1450311_at		gb:AV361504 /DB_XREF=gi:16397503 /DB_XREF=AV361504 /CLONE=7530427O07 /FEA=EST /CNT=11 /TID=Mm.150437.1 /TIER=ConsEnd /STK=4 /UG=Mm.150437 /LL=105046 /UG_GENE=AW742262 /UG_TITLE=expressed sequence AW742262
1426413_at	21398	8168	0.38	Neurod1	Neurogenic differentiation 1			gb:BM116592 /DB_XREF=gi:17079610 /DB_XREF=L0838E05-3 /CLONE=L0838E05 /FEA=FLmRNA /CNT=71 /TID=Mm.4636.1 /TIER=Stack /STK=13 /UG=Mm.4636 /LL=18012 /UG_GENE=Neurod1 /UG_TITLE=neurogenic differentiation 1 /FL=gb:BC018241.1
1451285_at	5936	2281	0.38	Fus	Fusion, derived from t(12;16) malignant liposarcoma (human)			gb:AF224264.1 /DB_XREF=gi:7920330 /FEA=FLmRNA /CNT=84 /TID=Mm.142866.1 /TIER=FL+Stack /STK=42 /UG=Mm.142866 /LL=233908 /UG_GENE=LOC233908 /DEF=Mus musculus pigpen protein mRNA, complete cds. /PROD=pigpen protein /FL=gb:AF224264.1
1457737_at	13197	5206	0.39	E130012K09	Hypothetical protein E130012K09			gb:BI872399 /DB_XREF=gi:16046074 /DB_XREF=603397064F1 /CLONE=IMAGE:5400830 /FEA=EST /CNT=6 /TID=Mm.101899.1 /TIER=ConsEnd /STK=3 /UG=Mm.101899 /UG_TITLE=ESTs
1425784_a_at	9708	3769	0.39	Olfm1	Olfactomedin 1	1455796_x_at		gb:D78264.1 /DB_XREF=gi:3218527 /FEA=FLmRNA /CNT=5 /TID=Mm.43278.2 /TIER=FL /STK=1 /UG=Mm.43278 /LL=56177 /UG_GENE=Olfm1 /DEF=Mus musculus mRNA for pancortin-3, complete cds. /PROD=pancortin-3 /FL=gb:AF028740.1 gb:D78264.1
1449159_at	22620	8936	0.4	Gnb3	Guanine nucleotide binding protein, beta 3			gb:NM_013530.1 /DB_XREF=gi:20502975 /GEN=Gnb3 /FEA=FLmRNA /CNT=28 /TID=Mm.68889.1 /TIER=FL+Stack /STK=21 /UG=Mm.68889 /LL=14695 /DEF=Mus musculus guanine nucleotide binding protein, beta 3 (Gnb3), mRNA. /PROD=guanine nucleotide-binding protein, beta-3subunit /FL=gb:BC018239.1 gb:NM_013530.1
1422612_at	6934	2841	0.41	Hk2	Hexokinase 2			gb:NM_013820.1 /DB_XREF=gi:7305142 /GEN=Hk2 /FEA=FLmRNA /CNT=60 /TID=Mm.2549.1 /TIER=FL+Stack /STK=27 /UG=Mm.2549 /LL=15277 /DEF=Mus musculus hexokinase 2 (Hk2), mRNA. /PROD=hexokinase 2 /FL=gb:NM_013820.1
1423176_at	8912	3790	0.43	Tob1	Transducer of ErbB-2.1	1440844_at		gb:BQ266486 /DB_XREF=gi:20491551 /DB_XREF=NISC_ff13c10.x1 /CLONE=IMAGE:2865786 /FEA=FLmRNA /CNT=63 /TID=Mm.4218.1 /TIER=Stack /STK=34 /UG=Mm.4218 /LL=22057 /UG_GENE=Tob1 /UG_TITLE=transducer of ErbB-2.1 /FL=gb:NM_009427.1
1437513_a_at	7453	3193	0.43	Serinc1	Serine incorporator 1			gb:BM239422 /DB_XREF=gi:17874692 /DB_XREF=K0534B09-3 /CLONE=K0534B09 /FEA=EST /CNT=20 /TID=Mm.29344.4 /TIER=Stack /STK=17 /UG=Mm.29344 /LL=56442 /UG_GENE=Tde1l /UG_TITLE=tumor differentially expressed 1, like
1422895_at	5565	2383	0.43	Vamp4	Vesicle-associated membrane protein 4			gb:NM_016796.1 /DB_XREF=gi:7949159 /GEN=Vamp4 /FEA=FLmRNA /CNT=76 /TID=Mm.10699.1 /TIER=FL+Stack /STK=8 /UG=Mm.10699 /LL=53330 /DEF=Mus musculus vesicle-associated membrane protein 4 (Vamp4), mRNA. /PROD=vesicle-associated membrane protein 4 /FL=gb:NM_016796.1 gb:AF061516.1
1428763_at	5061	2173	0.43	Smug1	Single-strand selective monofunctional uracil DNA glycosylase			gb:AK004735.1 /DB_XREF=gi:12836131 /GEN=Smug1 /FEA=mRNA /CNT=60 /TID=Mm.33583.1 /TIER=Stack /STK=22 /UG=Mm.33583 /LL=71726 /UG_TITLE=single-strand selective monofunctional uracil DNA glycosylase /DEF=Mus musculus adult male lung cDNA, RIKEN full-length enriched library, clone:1200013B09:single-strand selective monofunctional uracil DNA glycosylase, full insert sequence.
1448628_at	11604	5147	0.44	Scg3	Secretogranin III			gb:NM_009130.1 /DB_XREF=gi:6677866 /GEN=Scg3 /FEA=FLmRNA /CNT=84 /TID=Mm.2386.1 /TIER=FL+Stack /STK=52 /UG=Mm.2386 /LL=20255 /DEF=Mus musculus secretogranin III (Scg3), mRNA. /PROD=secretogranin III /FL=gb:U02982.1 gb:BC024785.1 gb:NM_009130.1
1421813_a_at	7642	3369	0.44	Psap	Prosaposin			gb:NM_011179.1 /DB_XREF=gi:7242190 /GEN=Psap /FEA=FLmRNA /CNT=332 /TID=Mm.3363.1 /TIER=FL /STK=1 /UG=Mm.3363 /LL=19156 /DEF=Mus musculus prosaposin (Psap), mRNA. /PROD=prosaposin /FL=gb:NM_011179.1
1438625_s_at	7132	3123	0.44	Pctk1	PCTAIRE-motif protein kinase 1			gb:BB249447 /DB_XREF=gi:8942193 /DB_XREF=BB249447 /CLONE=A730033A21 /FEA=EST /CNT=10 /TID=Mm.4597.7 /TIER=Stack /STK=10 /UG=Mm.4597 /LL=18555 /UG_GENE=Pctk1 /UG_TITLE=PCTAIRE-motif protein kinase 1
1448388_a_at	7436	3353	0.45	1110002B05Rik	RIKEN cDNA 1110002B05 gene			gb:NM_134054.1 /DB_XREF=gi:19527271 /GEN=1110002B05Rik /FEA=FLmRNA /CNT=172 /TID=Mm.30053.1 /TIER=FL+Stack /STK=80 /UG=Mm.30053 /LL=104725 /DEF=Mus musculus RIKEN cDNA 1110002B05 gene (1110002B05Rik), mRNA. /PROD=1110002B05Rik /FL=gb:BC022674.1 gb:NM_134054.1
1417502_at	10093	4596	0.46	Tspan7	Tetraspanin 7			gb:AF052492.1 /DB_XREF=gi:3549250 /FEA=FLmRNA /CNT=143 /TID=Mm.18590.1 /TIER=FL /STK=1 /UG=Mm.18590 /LL=21912 /UG_GENE=Tm4sf2 /DEF=Mus musculus cell surface glycoprotein A15 mRNA, complete cds. /PROD=cell surface glycoprotein A15 /FL=gb:NM_019634.1 gb:D26483.1 gb:BC026516.1 gb:AF052492.1
1422009_at	8568	3952	0.46	Atp1b2	ATPase, Na+/K+ transporting, beta 2 polypeptide			gb:NM_013415.1 /DB_XREF=gi:7242137 /GEN=Atp1b2 /FEA=FLmRNA /CNT=21 /TID=Mm.8041.1 /TIER=FL /STK=1 /UG=Mm.8041 /LL=11932 /DEF=Mus musculus ATPase, Na+K+ transporting, beta 2 polypeptide (Atp1b2), mRNA. /PROD=ATPase, Na+K+ transporting, beta 2 polypeptide /FL=gb:NM_013415.1
1452430_s_at	5819	2704	0.46	Sfrs1	Splicing factor, arginine/serine-rich 1 (ASF/SF2)			gb:X66091.1 /DB_XREF=gi:50027 /FEA=mRNA /CNT=44 /TID=Mm.220341.1 /TIER=ConsEnd /STK=0 /UG=Mm.220341 /UG_TITLE=M.musculus ASF mRNA /DEF=M.musculus ASF mRNA.
1424108_at	14396	6731	0.47	Glo1	Glyoxalase 1	1451240_a_at	1424109_a_at	gb:BC024663.1 /DB_XREF=gi:19354349 /FEA=FLmRNA /CNT=231 /TID=Mm.196149.1 /TIER=FL+Stack /STK=52 /UG=Mm.196149 /LL=66133 /UG_GENE=1110008E19Rik /DEF=Mus musculus, RIKEN cDNA 1110008E19 gene, clone MGC:30329 IMAGE:3591599, mRNA, complete cds. /PROD=RIKEN cDNA 1110008E19 gene /FL=gb:BC024663.1
1449622_s_at	7599	3582	0.47	Atp6ap1	ATPase, H+ transporting, lysosomal accessory protein 1			gb:AI316502 /DB_XREF=gi:4031769 /DB_XREF=uj14f01.x1 /CLONE=IMAGE:1908025 /FEA=EST /CNT=1 /TID=Mm.199761.1 /TIER=ConsEnd /STK=1 /UG=Mm.199761 /LL=102888 /UG_GENE=AI316502 /UG_TITLE=expressed sequence AI316502
1421063_s_at	9685	4709	0.49	Snrpn	Small nuclear ribonucleoprotein N			gb:NM_033174.1 /DB_XREF=gi:15029531 /GEN=Snurf /FEA=FLmRNA /CNT=18 /TID=Mm.195990.1 /TIER=FL /STK=2 /UG=Mm.195990 /LL=84704 /DEF=Mus musculus SNRPN upstream reading frame (Snurf), mRNA. /PROD=SNRPN upstream reading frame /FL=gb:NM_033174.1 gb:AF101042.1
1416250_at	5942	2896	0.49	Btg2	B-cell translocation gene 2, anti-proliferative			gb:BG965405 /DB_XREF=gi:14353042 /DB_XREF=602830441F1 /CLONE=IMAGE:4984979 /FEA=FLmRNA /CNT=229 /TID=Mm.903.1 /TIER=Stack /STK=23 /UG=Mm.903 /LL=12227 /UG_GENE=Btg2 /UG_TITLE=B-cell translocation gene 2, anti-proliferative /FL=gb:NM_007570.1
1453726_s_at	5533	2714	0.49	2810407C02Rik	RIKEN cDNA 2810407C02 gene			gb:AK013022.1 /DB_XREF=gi:12850128 /FEA=mRNA /CNT=61 /TID=Mm.218294.1 /TIER=ConsEnd /STK=0 /UG=Mm.218294 /LL=69227 /UG_GENE=2810407C02Rik /UG_TITLE=RIKEN cDNA 2810407C02 gene /DEF=Mus musculus 10, 11 days embryo whole body cDNA, RIKEN full-length enriched library, clone:2810407C02:homolog to SELENOPROTEIN T, full insert sequence.
1447640_s_at	5444	2720	0.5	Pbx3	Pre B-cell leukemia transcription factor 3			gb:BB554874 /DB_XREF=gi:9641240 /DB_XREF=BB554874 /CLONE=E330015M24 /FEA=EST /CNT=2 /TID=Mm.137604.1 /TIER=ConsEnd /STK=2 /UG=Mm.137604 /UG_TITLE=ESTs
1439143_at	2495	136	0.05	"9330167E06"	Hypothetical protein 9330167E06			gb:BB312992 /DB_XREF=gi:9013697 /DB_XREF=BB312992 /CLONE=B230339H07 /FEA=EST /CNT=11 /TID=Mm.140056.1 /TIER=Stack /STK=8 /UG=Mm.140056 /UG_TITLE=ESTs
1423423_at	4843	276	0.06	Pdia3	Protein disulfide isomerase associated 3			gb:BF319868 /DB_XREF=gi:11268705 /DB_XREF=uy78c05.x1 /CLONE=IMAGE:3665672 /FEA=FLmRNA /CNT=294 /TID=Mm.709.1 /TIER=Stack /STK=36 /UG=Mm.709 /LL=14827 /UG_GENE=Grp58 /UG_TITLE=glucose regulated protein, 58 kDa /FL=gb:NM_007952.1 gb:BC003285.1 gb:M73329.1
1416306_at	3669	230	0.06	Clca3	Chloride channel calcium activated 3			gb:NM_017474.1 /DB_XREF=gi:8567335 /GEN=Clca3 /FEA=FLmRNA /CNT=164 /TID=Mm.6594.1 /TIER=FL+Stack /STK=100 /UG=Mm.6594 /LL=23844 /DEF=Mus musculus chloride channel calcium activated 3 (Clca3), mRNA. /PROD=chloride channel calcium activated 3 /FL=gb:NM_017474.1 gb:AB017156.1
1437091_at	2058	125	0.06	Accn4	Amiloride-sensitive cation channel 4, pituitary			gb:AV323885 /DB_XREF=gi:15406242 /DB_XREF=AV323885 /CLONE=6230414D01 /FEA=EST /CNT=27 /TID=Mm.110790.1 /TIER=Stack /STK=26 /UG=Mm.110790 /UG_TITLE=ESTs, Weakly similar to JE0091 testis sodium channel 1 (H.sapiens)
1452406_x_at	4323	282	0.07	Erdr1	Erythroid differentiation regulator 1			gb:AJ007909.1 /DB_XREF=gi:3336885 /GEN=edr /FEA=mRNA /CNT=7 /TID=Mm.35829.2 /TIER=ConsEnd /STK=5 /UG=Mm.35829 /LL=170942 /DEF=Mus musculus mRNA for erythroid differentiation regulator, partial. /PROD=erythroid differentiation regulator
1429036_at	3428	230	0.07	Otop3	Otopetrin 3			gb:AK009293.1 /DB_XREF=gi:12844000 /FEA=mRNA /CNT=16 /TID=Mm.101844.1 /TIER=Stack /STK=14 /UG=Mm.101844 /LL=69602 /UG_GENE=2310011E08Rik /UG_TITLE=RIKEN cDNA 2310011E08 gene /DEF=Mus musculus adult male tongue cDNA, RIKEN full-length enriched library, clone:2310011E08:hypothetical protein, full insert sequence.
1432646_a_at	1960	144	0.07	2900097C17Rik	RIKEN cDNA 2900097C17 gene			gb:AK013851.1 /DB_XREF=gi:12851370 /FEA=mRNA /CNT=3 /TID=Mm.15985.3 /TIER=ConsEnd /STK=0 /UG=Mm.15985 /LL=14705 /UG_GENE=Gng3lg /UG_TITLE=G protein gamma 3 linked gene /DEF=Mus musculus adult male hippocampus cDNA, RIKEN full-length enriched library, clone:2900097C17:unclassifiable transcript, full insert sequence.
1453398_at	1322	96	0.07	A930009A15Rik	RIKEN cDNA A930009A15 gene			gb:AK020834.1 /DB_XREF=gi:12861538 /FEA=mRNA /CNT=6 /TID=Mm.132267.1 /TIER=ConsEnd /STK=4 /UG=Mm.132267 /LL=77798 /UG_GENE=A930009A15Rik /UG_TITLE=RIKEN cDNA A930009A15 gene /DEF=Mus musculus adult retina cDNA, RIKEN full-length enriched library, clone:A930009A15:unclassifiable, full insert sequence.
1454770_at	4797	363	0.08	Cckbr	Cholecystokinin B receptor	1460663_at		gb:AV221910 /DB_XREF=gi:15404818 /DB_XREF=AV221910 /CLONE=3632432P12 /FEA=EST /CNT=52 /TID=Mm.44513.2 /TIER=Stack /STK=52 /UG=Mm.44513 /LL=12426 /UG_GENE=Cckbr /UG_TITLE=cholecystokinin B receptor
1434177_at	2854	267	0.09	Ece1	Endothelin converting enzyme 1	1455741_a_at	1441423_at	gb:AI551117 /DB_XREF=gi:4483480 /DB_XREF=vx39a03.x1 /CLONE=IMAGE:1277548 /FEA=EST /CNT=139 /TID=Mm.21657.1 /TIER=Stack /STK=39 /UG=Mm.21657 /LL=100412 /UG_GENE=AW322500 /UG_TITLE=expressed sequence AW322500
1426062_a_at	4684	498	0.11	Casp7	Caspase 7	1448659_at		gb:U67321.1 /DB_XREF=gi:1894916 /GEN=Lice2 /FEA=FLmRNA /CNT=1 /TID=Mm.35687.2 /TIER=FL /STK=1 /UG=Mm.35687 /LL=12369 /DEF=Mus musculus Lice2 cysteine protease (Lice2) mRNA, complete cds. /PROD=Lice2 cysteine protease /FL=gb:U67321.1
1451297_at	4641	522	0.11	Gulo	Gulonolactone (L-) oxidase			gb:BC019856.1 /DB_XREF=gi:18044344 /FEA=FLmRNA /CNT=95 /TID=Mm.26207.1 /TIER=FL+Stack /STK=40 /UG=Mm.26207 /DEF=Mus musculus, clone MGC:29968 IMAGE:5123684, mRNA, complete cds. /PROD=Unknown (protein for MGC:29968) /FL=gb:BC019856.1
1429859_a_at	2674	291	0.11	Arl2bp	ADP-ribosylation factor-like 2 binding protein			gb:AK006418.1 /DB_XREF=gi:12839509 /FEA=mRNA /CNT=9 /TID=Mm.139700.2 /TIER=ConsEnd /STK=7 /UG=Mm.139700 /LL=76171 /UG_GENE=6330544B05Rik /UG_TITLE=RIKEN cDNA 6330544B05 gene /DEF=Mus musculus adult male testis cDNA, RIKEN full-length enriched library, clone:1700027H16:homolog to ARF-LIKE 2 BINDING PROTEIN BART1 (BINDER OF ARL TWO), full insert sequence.
1452899_at	2198	232	0.11	Rian	RNA imprinted and accumulated in nucleus			gb:AK017440.1 /DB_XREF=gi:12856677 /FEA=mRNA /CNT=45 /TID=Mm.23086.2 /TIER=Stack /STK=23 /UG=Mm.23086 /LL=75745 /UG_GENE=Rian /UG_TITLE=RNA imprinted and accumulated in nucleus /DEF=Mus musculus 10 days neonate head cDNA, RIKEN full-length enriched library, clone:5530401N18:unclassifiable transcript, full insert sequence.
1420831_at	1709	183	0.11	Qscn6	Quiescin Q6			gb:NM_023268.1 /DB_XREF=gi:12963608 /GEN=Qscn6 /FEA=FLmRNA /CNT=226 /TID=Mm.27035.1 /TIER=FL /STK=2 /UG=Mm.27035 /LL=104009 /DEF=Mus musculus quiescin Q6 (Qscn6), mRNA. /PROD=quiescin Q6 /FL=gb:NM_023268.1 gb:AB044284.1
1421915_a_at	1161	130	0.11	St3gal3	ST3 beta-galactoside alpha-2,3-sialyltransferase 3	1450406_a_at		gb:NM_009176.1 /DB_XREF=gi:6677954 /GEN=Siat6 /FEA=FLmRNA /CNT=39 /TID=Mm.41978.1 /TIER=FL /STK=1 /UG=Mm.41978 /LL=20441 /DEF=Mus musculus sialyltransferase 6 (N-acetyllacosaminide alpha 2,3-sialyltransferase) (Siat6), mRNA. /PROD=sialyltransferase 6 (N-acetyllacosaminide alpha2,3-sialyltransferase) /FL=gb:NM_009176.1
1438399_at	3038	374	0.12	Pex2	Peroxin 2			gb:BB428358 /DB_XREF=gi:16423904 /DB_XREF=BB428358 /CLONE=C630016N15 /FEA=EST /CNT=57 /TID=Mm.74737.1 /TIER=Stack /STK=10 /UG=Mm.74737 /UG_TITLE=ESTs
1460101_at	2383	297	0.12	Nrxn3	Neurexin III			gb:BG076361 /DB_XREF=gi:12558930 /DB_XREF=H3158G11-3 /CLONE=H3158G11 /FEA=EST /CNT=3 /TID=Mm.170142.1 /TIER=ConsEnd /STK=3 /UG=Mm.170142 /UG_TITLE=ESTs
1416505_at	3576	473	0.13	Nr4a1	Nuclear receptor subfamily 4, group A, member 1			gb:NM_010444.1 /DB_XREF=gi:6754215 /GEN=Nr4a1 /FEA=FLmRNA /CNT=128 /TID=Mm.119.1 /TIER=FL+Stack /STK=85 /UG=Mm.119 /LL=15370 /DEF=Mus musculus nuclear receptor subfamily 4, group A, member 1 (Nr4a1), mRNA. /PROD=nuclear receptor subfamily 4, group A, member 1 /FL=gb:NM_010444.1 gb:BC004770.1 gb:J04113.1
1452427_s_at	2445	310	0.13	Ptplad1	Protein tyrosine phosphatase-like A domain containing 1			gb:BM950003 /DB_XREF=gi:19433593 /DB_XREF=UI-M-EG0p-bux-e-10-0-UI.r1 /CLONE=IMAGE:5688177 /FEA=mRNA /CNT=34 /TID=Mm.200509.1 /TIER=ConsEnd /STK=0 /UG=Mm.200509 /LL=57874 /UG_GENE=Hspc121-pending /UG_TITLE=butyrate-induced transcript 1
1431829_a_at	1738	219	0.13	Rgl3	Ral guanine nucleotide dissociation stimulator-like 3			gb:AK004876.1 /DB_XREF=gi:12836389 /FEA=mRNA /CNT=1 /TID=Mm.110594.2 /TIER=ConsEnd /STK=0 /UG=Mm.110594 /LL=71746 /UG_GENE=1300003D20Rik /UG_TITLE=RIKEN cDNA 1300003D20 gene /DEF=Mus musculus adult male liver cDNA, RIKEN full-length enriched library, clone:1300003D20:RALGDS-LIKE PROTEIN 3, full insert sequence.
1454799_at	1227	158	0.13	A230097K15Rik	RIKEN cDNA A230097K15 gene			gb:AV300264 /DB_XREF=gi:15405905 /DB_XREF=AV300264 /CLONE=5730479B18 /FEA=EST /CNT=58 /TID=Mm.33759.2 /TIER=Stack /STK=46 /UG=Mm.33759 /LL=75802 /UG_GENE=4930458D05Rik /UG_TITLE=RIKEN cDNA 4930458D05 gene
1436633_at	1212	159	0.13	Bahcc1	BAH domain and coiled-coil containing 1			gb:BB323723 /DB_XREF=gi:15411430 /DB_XREF=BB323723 /CLONE=B430011F09 /FEA=EST /CNT=9 /TID=Mm.100216.1 /TIER=Stack /STK=8 /UG=Mm.100216 /UG_TITLE=ESTs
1454658_at	1014	137	0.13	Ilvbl	IlvB (bacterial acetolactate synthase)-like			gb:BI408416 /DB_XREF=gi:15169339 /DB_XREF=602963867F1 /CLONE=IMAGE:5119120 /FEA=EST /CNT=101 /TID=Mm.2644.1 /TIER=Stack /STK=90 /UG=Mm.2644 /LL=103204 /UG_GENE=AI415009 /UG_TITLE=expressed sequence AI415009
1421348_a_at	1271	174	0.14	1500001H12Rik	RIKEN cDNA 1500001H12 gene	1421349_x_at		gb:NM_021316.1 /DB_XREF=gi:10946619 /GEN=Bm88-pending /FEA=FLmRNA /CNT=11 /TID=Mm.87027.1 /TIER=FL /STK=2 /UG=Mm.87027 /LL=57754 /DEF=Mus musculus BM88 antigen (Bm88-pending), mRNA. /PROD=BM88 antigen /FL=gb:NM_021316.1 gb:AF243130.1
1448279_at	2624	386	0.15	Arpc3	Actin related protein 2/3 complex, subunit 3			gb:BC013618.1 /DB_XREF=gi:15488992 /FEA=FLmRNA /CNT=185 /TID=Mm.24498.1 /TIER=FL+Stack /STK=104 /UG=Mm.24498 /LL=56378 /UG_GENE=Arpc3 /DEF=Mus musculus, actin related protein 23 complex, subunit 3 (21 kDa), clone MGC:18996 IMAGE:4013537, mRNA, complete cds. /PROD=actin related protein 23 complex, subunit 3 (21kDa) /FL=gb:BC013618.1 gb:NM_019824.1 gb:AB038243.1
1438068_at	1266	192	0.15	BB251859	Transcribed locus			gb:BB251859 /DB_XREF=gi:8944605 /DB_XREF=BB251859 /CLONE=A730048G08 /FEA=EST /CNT=21 /TID=Mm.100454.1 /TIER=Stack /STK=12 /UG=Mm.100454 /UG_TITLE=ESTs
1448674_at	1085	166	0.15	Rnf25	Ring finger protein 25			gb:NM_021313.1 /DB_XREF=gi:10946615 /GEN=Rnf25 /FEA=FLmRNA /CNT=86 /TID=Mm.86910.1 /TIER=FL+Stack /STK=48 /UG=Mm.86910 /LL=57751 /DEF=Mus musculus ring finger protein 25 (Rnf25), mRNA. /PROD=ring finger protein 25 /FL=gb:AF171060.1 gb:NM_021313.1
1416771_at	3246	515	0.16	Trappc3	Trafficking protein particle complex 3			gb:BC003736.1 /DB_XREF=gi:13277653 /FEA=FLmRNA /CNT=129 /TID=Mm.8392.1 /TIER=FL+Stack /STK=70 /UG=Mm.8392 /LL=27096 /UG_GENE=Bet3-pending /DEF=Mus musculus, Bet3 homolog (S. cerevisiae), clone MGC:5818 IMAGE:3490979, mRNA, complete cds. /PROD=Bet3 homolog (S. cerevisiae) /FL=gb:BC003736.1 gb:NM_013718.1 gb:AF041433.1
1420008_s_at	1357	212	0.16	Wwc1	WW, C2 and coiled-coil domain containing 1	1427261_at		gb:AU017197 /DB_XREF=gi:3372310 /DB_XREF=AU017197 /CLONE=J0735G03 /FEA=EST /CNT=1 /TID=Mm.203700.1 /TIER=ConsEnd /STK=1 /UG=Mm.203700 /LL=104476 /UG_GENE=AU017197 /UG_TITLE=expressed sequence AU017197
1424636_at	1323	205	0.16	2610204L23Rik	RIKEN cDNA 2610204L23 gene			gb:AK011721.1 /DB_XREF=gi:12848026 /FEA=FLmRNA /CNT=169 /TID=Mm.22109.1 /TIER=Stack /STK=52 /UG=Mm.22109 /LL=67163 /UG_GENE=2610204L23Rik /UG_TITLE=RIKEN cDNA 2610204L23 gene /DEF=Mus musculus 10 days embryo whole body cDNA, RIKEN full-length enriched library, clone:2610039G03:homolog to GK001, full insert sequence. /FL=gb:AB040489.1
1460191_at	1159	184	0.16	Ykt6	YKT6 homolog (S. Cerevisiae)			gb:NM_019661.1 /DB_XREF=gi:9790288 /GEN=Ykt6-pending /FEA=FLmRNA /CNT=160 /TID=Mm.24353.1 /TIER=FL /STK=2 /UG=Mm.24353 /LL=56418 /DEF=Mus musculus prenylated SNARE protein (Ykt6-pending), mRNA. /PROD=SNARE protein Ykt6 /FL=gb:AF076956.1 gb:NM_019661.1 gb:BC006760.1
1437633_at	1043	165	0.16	Ankrd11	Ankyrin repeat domain 11			gb:BE333865 /DB_XREF=gi:9207641 /DB_XREF=us28c03.y1 /CLONE=IMAGE:3168388 /FEA=EST /CNT=93 /TID=Mm.41929.2 /TIER=Stack /STK=12 /UG=Mm.41929 /UG_TITLE=ESTs, Moderately similar to AF121775 1 nasopharyngeal carcinoma susceptibility protein LZ16 (H.sapiens)
1445721_at	1000	160	0.16	A830021M18	Hypothetical protein A830021M18			gb:BB265715 /DB_XREF=gi:16400305 /DB_XREF=BB265715 /CLONE=A830021M18 /FEA=EST /CNT=4 /TID=Mm.208427.1 /TIER=ConsEnd /STK=2 /UG=Mm.208427 /UG_TITLE=ESTs
1436093_at	1994	342	0.17	Epha10	Eph receptor A10			gb:BE981269 /DB_XREF=gi:10650199 /DB_XREF=UI-M-CG0p-bda-c-04-0-UI.s1 /CLONE=UI-M-CG0p-bda-c-04-0-UI /FEA=EST /CNT=13 /TID=Mm.39121.1 /TIER=Stack /STK=11 /UG=Mm.39121 /UG_TITLE=ESTs
1425227_a_at	1775	294	0.17	Atp6v0a1	ATPase, H+ transporting, lysosomal V0 subunit A1			gb:BC001995.1 /DB_XREF=gi:12805076 /FEA=FLmRNA /CNT=7 /TID=Mm.20869.2 /TIER=FL /STK=4 /UG=Mm.20869 /LL=11975 /UG_GENE=Atpv0a1 /DEF=Mus musculus, Similar to ATPase, H+ transporting, lysosomal (vacuolar proton pump) noncatalytic accessory protein 1 (110160 kDa), clone MGC:5735 IMAGE:3487314, mRNA, complete cds. /PROD=Similar to ATPase, H+ transporting, lysosomal(vacuolar proton pump) noncatalytic a…
1457045_at	1714	289	0.17	Galnt13	UDP-N-acetyl-alpha-D-galactosamine:polypeptide N-acetylgalactosaminyltransferase 13			gb:BB632261 /DB_XREF=gi:16468873 /DB_XREF=BB632261 /CLONE=A230020F20 /FEA=EST /CNT=12 /TID=Mm.156869.1 /TIER=ConsEnd /STK=5 /UG=Mm.156869 /LL=99464 /UG_GENE=BB182356 /UG_TITLE=expressed sequence BB182356
1460633_at	1397	243	0.17	Prpf19	PRP19/PSO4 pre-mRNA processing factor 19 homolog (S. cerevisiae)			gb:BC004070.1 /DB_XREF=gi:13278554 /FEA=FLmRNA /CNT=384 /TID=Mm.29835.1 /TIER=FL+Stack /STK=276 /UG=Mm.29835 /LL=106859 /UG_GENE=AA617263 /DEF=Mus musculus, clone MGC:8213 IMAGE:3591050, mRNA, complete cds. /PROD=Unknown (protein for MGC:8213) /FL=gb:BC004070.1 gb:NM_134129.1 gb:AF251503.1
1444317_at	4590	807	0.18	LOC546479	Hypothetical LOC546479			gb:BB078305 /DB_XREF=gi:16260464 /DB_XREF=BB078305 /CLONE=9330152J21 /FEA=EST /CNT=5 /TID=Mm.132257.1 /TIER=ConsEnd /STK=2 /UG=Mm.132257 /LL=103508 /UG_GENE=BB078305 /UG_TITLE=expressed sequence BB078305
1427705_a_at	1911	346	0.18	Nfkb1	Nuclear factor of kappa light chain gene enhancer in B-cells 1, p105			gb:L28118.1 /DB_XREF=gi:468361 /FEA=mRNA /CNT=1 /TID=Mm.3420.3 /TIER=ConsEnd /STK=0 /UG=Mm.3420 /LL=18033 /UG_GENE=Nfkb1 /UG_TITLE=nuclear factor of kappa light chain gene enhancer in B-cells 1, p105 /DEF=Mouse NF-kappa-B (p105) mRNA.
1422643_at	1818	336	0.18	Moxd1	Monooxygenase, DBH-like 1			gb:NM_021509.1 /DB_XREF=gi:10946925 /GEN=3230402N08Rik /FEA=FLmRNA /CNT=82 /TID=Mm.22805.1 /TIER=FL+Stack /STK=22 /UG=Mm.22805 /LL=59012 /DEF=Mus musculus RIKEN cDNA 3230402N08 gene (3230402N08Rik), mRNA. /PROD=hypothetical protein, MNCb-5203 /FL=gb:NM_021509.1
1421327_at	1570	282	0.18	Mtap2	Microtubule-associated protein 2	1421328_at		gb:NM_008632.1 /DB_XREF=gi:6678943 /GEN=Mtap2 /FEA=FLmRNA /CNT=21 /TID=Mm.413.1 /TIER=FL /STK=2 /UG=Mm.413 /LL=17756 /DEF=Mus musculus microtubule-associated protein 2 (Mtap2), mRNA. /PROD=microtubule-associated protein 2 /FL=gb:M21041.1 gb:NM_008632.1
1416992_at	1204	220	0.18	Mfng	Manic fringe homolog (Drosophila)			gb:NM_008595.1 /DB_XREF=gi:6678871 /GEN=Mfng /FEA=FLmRNA /CNT=94 /TID=Mm.517.1 /TIER=FL+Stack /STK=61 /UG=Mm.517 /LL=17305 /DEF=Mus musculus manic fringe homolog (Drosophila) (Mfng), mRNA. /PROD=manic fringe homolog (Drosophila) /FL=gb:BC010983.1 gb:AF015769.1 gb:U94349.1 gb:NM_008595.1
1436265_at	1162	213	0.18	6330405H19	Lung RCB-0558 LLC cDNA, RIKEN full-length enriched library, clone:G730014J15 product:hypothetical protein, full insert sequence			gb:BB225226 /DB_XREF=gi:8893837 /DB_XREF=BB225226 /CLONE=A530090F04 /FEA=EST /CNT=11 /TID=Mm.131865.1 /TIER=Stack /STK=10 /UG=Mm.131865 /UG_TITLE=ESTs
1460605_at	3195	606	0.19	Crxos1	Crx opposite strand transcript 1			gb:AU045294 /DB_XREF=gi:3981477 /DB_XREF=AU045294 /CLONE=J0932G03 /FEA=EST /CNT=13 /TID=Mm.23520.2 /TIER=Stack /STK=9 /UG=Mm.23520 /LL=79401 /UG_GENE=Spz1-pending /UG_TITLE=spermatogenic Zip 1
1423503_at	2311	442	0.19	Jam3	Junction adhesion molecule 3	1444895_at		gb:AK013156.1 /DB_XREF=gi:12850342 /GEN=Jcam2 /FEA=FLmRNA /CNT=157 /TID=Mm.28770.1 /TIER=Stack /STK=14 /UG=Mm.28770 /LL=83964 /UG_TITLE=junction cell adhesion molecule 3 /DEF=Mus musculus 10, 11 days embryo whole body cDNA, RIKEN full-length enriched library, clone:2810425J03:junction cell adhesion molecule 2, full insert sequence. /FL=gb:NM_023277.1 gb:BC024357.1
1429109_at	1129	218	0.19	Msl2l1	Male-specific lethal 2-like 1 (Drosophila)			gb:BB376997 /DB_XREF=gi:16407567 /DB_XREF=BB376997 /CLONE=C130087J23 /FEA=mRNA /CNT=112 /TID=Mm.98082.1 /TIER=Stack /STK=19 /UG=Mm.98082 /LL=77853 /UG_GENE=E130103E02Rik /UG_TITLE=RIKEN cDNA E130103E02 gene
1438672_at	2683	531	0.2	Parvb	Parvin, beta			gb:BI134721 /DB_XREF=gi:14584969 /DB_XREF=UI-M-BH3-bsw-a-06-0-UI.s1 /CLONE=UI-M-BH3-bsw-a-06-0-UI /FEA=EST /CNT=54 /TID=Mm.41928.1 /TIER=Stack /STK=9 /UG=Mm.41928 /LL=105873 /UG_GENE=AI595373 /UG_TITLE=expressed sequence AI595373
1449928_at	2331	457	0.2	Dynlt3	Dynein light chain Tctex-type 3			gb:NM_025975.2 /DB_XREF=gi:19923872 /GEN=2310075M16Rik /FEA=FLmRNA /CNT=208 /TID=Mm.29150.1 /TIER=FL /STK=3 /UG=Mm.29150 /LL=67117 /DEF=Mus musculus RIKEN cDNA 2310075M16 gene (2310075M16Rik), mRNA. /PROD=T-complex associated-testis-expressed 1-like /FL=gb:NM_025975.2
1426454_at	1640	321	0.2	Arhgdib	Rho, GDP dissociation inhibitor (GDI) beta			gb:AK002516.1 /DB_XREF=gi:12832553 /GEN=Arhgdib /FEA=FLmRNA /CNT=86 /TID=Mm.2241.1 /TIER=Stack /STK=15 /UG=Mm.2241 /LL=11857 /UG_TITLE=Rho, GDP dissociation inhibitor (GDI) beta /DEF=Mus musculus adult male kidney cDNA, RIKEN full-length enriched library, clone:0610011A23:rho, GDP dissociation inhibitor (GDI) beta, full insert sequence. /FL=gb:L07918.1
1439078_at	1035	208	0.2	Klhl4	Kelch-like 4 (Drosophila)			gb:BB037068 /DB_XREF=gi:15403720 /DB_XREF=BB037068 /CLONE=5930422O20 /FEA=EST /CNT=19 /TID=Mm.132583.1 /TIER=Stack /STK=8 /UG=Mm.132583 /UG_TITLE=ESTs, Moderately similar to KHL1_MOUSE Kelch-like protein 1 (M.musculus)
1416530_a_at	4669	996	0.21	Pnp	Purine-nucleoside phosphorylase	1453299_a_at		gb:BC003788.1 /DB_XREF=gi:13277800 /FEA=FLmRNA /CNT=135 /TID=Mm.17932.1 /TIER=FL+Stack /STK=83 /UG=Mm.17932 /LL=18950 /UG_GENE=Pnp /DEF=Mus musculus, purine-nucleoside phosphorylase, clone MGC:6018 IMAGE:3600212, mRNA, complete cds. /PROD=purine-nucleoside phosphorylase /FL=gb:L11291.1 gb:L11290.1 gb:NM_013632.1 gb:U35374.1 gb:BC003788.1
1452787_a_at	3827	810	0.21	Prmt1	Protein arginine N-methyltransferase 1			gb:AK020120.1 /DB_XREF=gi:12860606 /GEN=Hrmt1l2 /FEA=mRNA /CNT=44 /TID=Mm.27545.3 /TIER=Stack /STK=41 /UG=Mm.27545 /LL=15469 /UG_TITLE=heterogeneous nuclear ribonucleoproteins methyltransferase-like 2 (S. cerevisiae) /DEF=Mus musculus 12 days embryo male wolffian duct includes surrounding region cDNA, RIKEN full-length enriched library, clone:6720434D09:heterogeneous nuclear ribonucleoproteins me…
1452601_a_at	3089	641	0.21	Acbd6	Acyl-Coenzyme A binding domain containing 6	1453199_at		gb:AK002470.1 /DB_XREF=gi:12832476 /FEA=mRNA /CNT=27 /TID=Mm.22537.1 /TIER=Stack /STK=19 /UG=Mm.22537 /LL=72482 /UG_GENE=2610100E10Rik /UG_TITLE=RIKEN cDNA 2610100E10 gene /DEF=Mus musculus adult male kidney cDNA, RIKEN full-length enriched library, clone:0610010G04:homolog to ACYL-COA-BINDING PROTEIN (ACBP) (DIAZEPAM BINDING INHIBITOR) (DBI) (ENDOZEPINE) (EP), full insert sequence.
1423636_at	2992	639	0.21	Wdr31	WD repeat domain 31	1459664_at		gb:AK017259.1 /DB_XREF=gi:12856408 /FEA=FLmRNA /CNT=20 /TID=Mm.155573.1 /TIER=Stack /STK=8 /UG=Mm.155573 /LL=71354 /UG_GENE=5430402I10Rik /UG_TITLE=RIKEN cDNA 5430402I10 gene /DEF=Mus musculus 6 days neonate head cDNA, RIKEN full-length enriched library, clone:5430402I10:SPERMATID WD-REPEAT PROTEIN, full insert sequence. /FL=gb:NM_023597.1 gb:AF274321.1
1452292_at	2280	468	0.21	Ap2b1	Adaptor-related protein complex 2, beta 1 subunit			gb:AV271093 /DB_XREF=gi:15405449 /DB_XREF=AV271093 /CLONE=4931405M20 /FEA=mRNA /CNT=124 /TID=Mm.39053.1 /TIER=Stack /STK=19 /UG=Mm.39053 /LL=71770 /UG_GENE=Ap2b1 /UG_TITLE=adaptor-related protein complex 2, beta 1 subunit
1427285_s_at	1795	383	0.21	Malat1	Metastasis associated lung adenocarcinoma transcript 1 (non-coding RNA)			gb:AI788623 /DB_XREF=gi:5336339 /DB_XREF=uk47d04.x1 /CLONE=IMAGE:1972135 /FEA=mRNA /CNT=50 /TID=Mm.220932.1 /TIER=ConsEnd /STK=1 /UG=Mm.220932 /UG_TITLE=Mus musculus, clone IMAGE:3582796, mRNA
1453126_at	1717	361	0.21	Lrfn2	Leucine rich repeat and fibronectin type III domain containing 2			gb:AK017594.1 /DB_XREF=gi:12856913 /FEA=mRNA /CNT=34 /TID=Mm.133607.1 /TIER=Stack /STK=29 /UG=Mm.133607 /LL=70530 /UG_GENE=5730420O05Rik /UG_TITLE=RIKEN cDNA 5730420O05 gene /DEF=Mus musculus 8 days embryo whole body cDNA, RIKEN full-length enriched library, clone:5730420O05:homolog to KIAA1246 PROTEIN (FRAGMENT), full insert sequence.
1431393_at	4344	977	0.22	Six6os1	Six6 opposite strand transcript 1	1431896_at		gb:AK015397.1 /DB_XREF=gi:12853723 /FEA=mRNA /CNT=3 /TID=Mm.107632.1 /TIER=ConsEnd /STK=0 /UG=Mm.107632 /LL=75801 /UG_GENE=4930447C04Rik /UG_TITLE=RIKEN cDNA 4930447C04 gene /DEF=Mus musculus adult male testis cDNA, RIKEN full-length enriched library, clone:4930447C04:hypothetical protein, full insert sequence.
1415859_at	2330	523	0.22	Eif3s8	Eukaryotic translation initiation factor 3, subunit 8			gb:BB858329 /DB_XREF=gi:17099783 /DB_XREF=BB858329 /CLONE=G370050E07 /FEA=FLmRNA /CNT=444 /TID=Mm.22776.1 /TIER=Stack /STK=14 /UG=Mm.22776 /LL=56347 /UG_GENE=Eif3s8 /UG_TITLE=eukaryotic translation initiation factor 3, subunit 8 (110 kDa) /FL=gb:BC025032.1 gb:BC024855.1 gb:U67328.1 gb:NM_019646.1
1421477_at	1822	395	0.22	Cplx2	Complexin 2			gb:NM_009946.1 /DB_XREF=gi:6753507 /GEN=Cplx2 /FEA=FLmRNA /CNT=6 /TID=Mm.4705.1 /TIER=FL /STK=2 /UG=Mm.4705 /LL=12890 /DEF=Mus musculus complexin 2 (Cplx2), mRNA. /PROD=complexin 2 /FL=gb:D38613.1 gb:NM_009946.1
1424159_at	1639	367	0.22	1300010M03Rik	RIKEN cDNA 1300010M03 gene			gb:BC016089.1 /DB_XREF=gi:16359248 /FEA=FLmRNA /CNT=105 /TID=Mm.33881.1 /TIER=FL+Stack /STK=48 /UG=Mm.33881 /LL=67998 /UG_GENE=1300010M03Rik /DEF=Mus musculus, RIKEN cDNA 1300010M03 gene, clone MGC:27608 IMAGE:4503475, mRNA, complete cds. /PROD=RIKEN cDNA 1300010M03 gene /FL=gb:BC016089.1
1423325_at	1474	328	0.22	Pnn	Pinin			gb:BF721477 /DB_XREF=gi:12022479 /DB_XREF=mab17d12.x1 /CLONE=IMAGE:3970607 /FEA=FLmRNA /CNT=140 /TID=Mm.22347.1 /TIER=Stack /STK=10 /UG=Mm.22347 /LL=18949 /UG_GENE=Pnn /UG_TITLE=pinin /FL=gb:NM_008891.1
1421534_at	4382	1007	0.23	Fin15	Fibroblast growth factor inducible 15	1439263_at		gb:NM_008016.1 /DB_XREF=gi:6679796 /GEN=Fin15 /FEA=FLmRNA /CNT=5 /TID=Mm.3421.1 /TIER=FL /STK=2 /UG=Mm.3421 /LL=14210 /DEF=Mus musculus fibroblast growth factor inducible 15 (Fin15), mRNA. /PROD=fibroblast growth factor inducible 15 /FL=gb:NM_008016.1 gb:U42384.1
1416444_at	4799	1155	0.24	Elovl2	Elongation of very long chain fatty acids (FEN1/Elo2, SUR4/Elo3, yeast)-like 2			gb:NM_019423.1 /DB_XREF=gi:9507146 /GEN=Elovl2 /FEA=FLmRNA /CNT=140 /TID=Mm.2567.1 /TIER=FL+Stack /STK=89 /UG=Mm.2567 /LL=54326 /DEF=Mus musculus elongation of very long chain fatty acids (FEN1Elo2, SUR4Elo3, yeast)-like 2 (Elovl2), mRNA. /PROD=sequence similarity to Cig30 2 /FL=gb:NM_019423.1 gb:AF170908.1
1453127_at	2218	522	0.24	Ppm1j	Protein phosphatase 1J			gb:AK009235.1 /DB_XREF=gi:12843901 /FEA=mRNA /CNT=38 /TID=Mm.34387.1 /TIER=Stack /STK=28 /UG=Mm.34387 /LL=71887 /UG_GENE=2310008J22Rik /UG_TITLE=RIKEN cDNA 2310008J22 gene /DEF=Mus musculus adult male tongue cDNA, RIKEN full-length enriched library, clone:2310008J22:homolog to HYPOTHETICAL 33.5 KDA PROTEIN, full insert sequence.
1450846_at	1815	441	0.24	Bzw1	Basic leucine zipper and W2 domains 1			gb:AV144956 /DB_XREF=gi:5349089 /DB_XREF=AV144956 /CLONE=2810440D21 /FEA=FLmRNA /CNT=465 /TID=Mm.21848.1 /TIER=Stack /STK=8 /UG=Mm.21848 /LL=66882 /UG_GENE=1200015E15Rik /UG_TITLE=RIKEN cDNA 1200015E15 gene /FL=gb:BC005466.1 gb:NM_025824.1
1444100_at	1321	319	0.24	1110003E01Rik	RIKEN cDNA 1110003E01 gene			gb:AI480718 /DB_XREF=gi:4373944 /DB_XREF=vh60d09.x1 /CLONE=IMAGE:891377 /FEA=EST /CNT=6 /TID=Mm.216295.1 /TIER=ConsEnd /STK=2 /UG=Mm.216295 /UG_TITLE=ESTs, Highly similar to S12207 hypothetical protein (M.musculus)
1434001_at	3118	815	0.26	Ttc9c	Tetratricopeptide repeat domain 9C	1432245_s_at	1430569_at	gb:AV004411 /DB_XREF=gi:15431376 /DB_XREF=AV004411 /CLONE=0610042A19 /FEA=EST /CNT=61 /TID=Mm.31854.2 /TIER=Stack /STK=47 /UG=Mm.31854 /LL=70387 /UG_GENE=2210019E14Rik /UG_TITLE=RIKEN cDNA 2210019E14 gene
1429440_at	2321	599	0.26	1810041L15Rik	RIKEN cDNA 1810041L15 gene	1455515_at		gb:BI734299 /DB_XREF=gi:15711312 /DB_XREF=603351218F1 /CLONE=IMAGE:5358653 /FEA=mRNA /CNT=41 /TID=Mm.22913.1 /TIER=Stack /STK=22 /UG=Mm.22913 /LL=72301 /UG_GENE=1810041L15Rik /UG_TITLE=RIKEN cDNA 1810041L15 gene
1421085_at	2214	579	0.26	Rs1h	Retinoschisis 1 homolog (human)			gb:NM_011302.1 /DB_XREF=gi:6755377 /GEN=Rs1h /FEA=FLmRNA /CNT=41 /TID=Mm.41982.1 /TIER=FL /STK=1 /UG=Mm.41982 /LL=20147 /DEF=Mus musculus retinoschisis 1 homolog (human) (Rs1h), mRNA. /PROD=retinoschisis 1 homolog (human) /FL=gb:NM_011302.1 gb:AF073780.1 gb:AF084561.1
1415784_at	1246	326	0.26	Vps35	Vacuolar protein sorting 35			gb:BI654068 /DB_XREF=gi:15568304 /DB_XREF=603280145F1 /CLONE=IMAGE:5310419 /FEA=FLmRNA /CNT=473 /TID=Mm.196201.1 /TIER=Stack /STK=8 /UG=Mm.196201 /LL=65114 /UG_GENE=Vps35 /UG_TITLE=vacuolar protein sorting 35 /FL=gb:BC005469.1 gb:NM_008582.1 gb:AF226323.1 gb:NM_022997.1 gb:U47024.1 gb:BC006637.1
1433023_at	1155	302	0.26	Slc8a3	Solute carrier family 8 (sodium/calcium exchanger), member 3			gb:AK010109.1 /DB_XREF=gi:12845323 /FEA=mRNA /CNT=1 /TID=Mm.158336.1 /TIER=ConsEnd /STK=0 /UG=Mm.158336 /LL=70185 /UG_GENE=2310068G24Rik /UG_TITLE=RIKEN cDNA 2310068G24 gene /DEF=Mus musculus adult male tongue cDNA, RIKEN full-length enriched library, clone:2310068G24:unclassifiable transcript, full insert sequence.
1422509_at	3023	827	0.27	U2af1	U2 small nuclear ribonucleoprotein auxiliary factor (U2AF) 1			gb:NM_024187.1 /DB_XREF=gi:17530979 /GEN=U2af1 /FEA=FLmRNA /CNT=106 /TID=Mm.144028.1 /TIER=FL+Stack /STK=62 /UG=Mm.144028 /LL=108121 /DEF=Mus musculus U2 small nuclear ribonucleoprotein auxiliary factor (U2AF),35 kDa (U2af1), mRNA. /PROD=U2 small nuclear ribonucleoprotein auxiliaryfactor (U2AF),35 kDa /FL=gb:NM_024187.1
1443866_at	2959	789	0.27	Lrtm1	Leucine-rich repeats and transmembrane domains 1			gb:AV359781 /DB_XREF=gi:16397413 /DB_XREF=AV359781 /CLONE=7530401K18 /FEA=EST /CNT=14 /TID=Mm.184968.1 /TIER=ConsEnd /STK=2 /UG=Mm.184968 /UG_TITLE=ESTs
1435367_at	1442	391	0.27	Mapk4	Mitogen-activated protein kinase 4			gb:BQ177154 /DB_XREF=gi:20352646 /DB_XREF=UI-M-DJ2-bwa-d-10-0-UI.s1 /CLONE=UI-M-DJ2-bwa-d-10-0-UI /FEA=EST /CNT=22 /TID=Mm.122198.1 /TIER=Stack /STK=17 /UG=Mm.122198 /UG_TITLE=ESTs
1450184_s_at	1292	355	0.27	Tef	Thyrotroph embryonic factor			gb:NM_017376.1 /DB_XREF=gi:8394434 /GEN=Tef /FEA=FLmRNA /CNT=12 /TID=Mm.154152.1 /TIER=FL /STK=2 /UG=Mm.154152 /LL=21685 /DEF=Mus musculus thyrotroph embryonic factor (Tef), mRNA. /PROD=thyrotroph embryonic factor /FL=gb:NM_017376.1 gb:AF194420.1
1435856_x_at	1131	305	0.27	Smarcb1	SWI/SNF related, matrix associated, actin dependent regulator of chromatin, subfamily b, member 1			gb:AV310148 /DB_XREF=gi:6363183 /DB_XREF=AV310148 /CLONE=5730588L04 /FEA=EST /CNT=13 /TID=Mm.26116.3 /TIER=Stack /STK=13 /UG=Mm.26116 /LL=20587 /UG_GENE=Smarcb1 /UG_TITLE=SWISNF related, matrix associated, actin dependent regulator of chromatin, subfamily b, member 1
1424990_at	1023	272	0.27	Tmem142a	Transmembrane protein 142A			gb:BQ173909 /DB_XREF=gi:20349395 /DB_XREF=UI-M-DJ2-bvv-e-04-0-UI.s1 /CLONE=UI-M-DJ2-bvv-e-04-0-UI /FEA=FLmRNA /CNT=53 /TID=Mm.218582.1 /TIER=Stack /STK=9 /UG=Mm.218582 /UG_TITLE=Mus musculus, Similar to hypothetical protein FLJ14466, clone MGC:28390 IMAGE:4022503, mRNA, complete cds /FL=gb:BC023149.1
1428877_at	3531	977	0.28	Srp72	Signal recognition particle 72			gb:BM942773 /DB_XREF=gi:19402636 /DB_XREF=UI-M-CG0p-bdg-g-06-0-UI.r1 /CLONE=UI-M-CG0p-bdg-g-06-0-UI /FEA=mRNA /CNT=202 /TID=Mm.27600.1 /TIER=Stack /STK=21 /UG=Mm.27600 /LL=66661 /UG_GENE=5730576P14Rik /UG_TITLE=RIKEN cDNA 5730576P14 gene
1426757_at	3056	865	0.28	Ampd2	Adenosine monophosphate deaminase 2 (isoform L)	1438941_x_at		gb:AK004759.1 /DB_XREF=gi:12836178 /FEA=mRNA /CNT=117 /TID=Mm.34758.1 /TIER=Stack /STK=75 /UG=Mm.34758 /LL=74138 /UG_GENE=1200014F01Rik /UG_TITLE=RIKEN cDNA 1200014F01 gene /DEF=Mus musculus adult male lung cDNA, RIKEN full-length enriched library, clone:1200014F01:homolog to AMP DEAMINASE 2 (EC 3.5.4.6) (AMP DEAMINASE ISOFORM L), full insert sequence.
1447827_x_at	2671	735	0.28	Spop	Speckle-type POZ protein			gb:AV353779 /DB_XREF=gi:6394836 /DB_XREF=AV353779 /CLONE=7120413C22 /FEA=EST /CNT=2 /TID=Mm.87642.1 /TIER=ConsEnd /STK=2 /UG=Mm.87642 /UG_TITLE=ESTs
1448268_at	2335	648	0.28	Tmed9	Transmembrane emp24 protein transport domain containing 9			gb:NM_026211.1 /DB_XREF=gi:13385717 /GEN=2400003B06Rik /FEA=FLmRNA /CNT=213 /TID=Mm.45233.1 /TIER=FL+Stack /STK=108 /UG=Mm.45233 /LL=67511 /DEF=Mus musculus RIKEN cDNA 2400003B06 gene (2400003B06Rik), mRNA. /PROD=RIKEN cDNA 2400003B06 /FL=gb:BC004691.1 gb:NM_026211.1
1426473_at	1520	427	0.28	Dnajc9	DnaJ (Hsp40) homolog, subfamily C, member 9			gb:BM942465 /DB_XREF=gi:19402328 /DB_XREF=UI-M-BH3-bsi-d-06-0-UI.r1 /CLONE=UI-M-BH3-bsi-d-06-0-UI /FEA=FLmRNA /CNT=146 /TID=Mm.2871.1 /TIER=Stack /STK=12 /UG=Mm.2871 /LL=105595 /UG_GENE=AU020082 /UG_TITLE=expressed sequence AU020082 /FL=gb:BC027012.1
1456329_at	1414	397	0.28	Prtg	Protogenin homolog (Gallus gallus)			gb:BB130087 /DB_XREF=gi:16266253 /DB_XREF=BB130087 /CLONE=9630043L16 /FEA=EST /CNT=21 /TID=Mm.31696.1 /TIER=Stack /STK=11 /UG=Mm.31696 /UG_TITLE=ESTs
1420878_a_at	1269	357	0.28	Ywhab	Tyrosine 3-monooxygenase/tryptophan 5-monooxygenase activation protein, beta polypeptide			gb:NM_018753.1 /DB_XREF=gi:9055383 /GEN=Ywhab /FEA=FLmRNA /CNT=239 /TID=Mm.34319.1 /TIER=FL /STK=2 /UG=Mm.34319 /LL=54401 /DEF=Mus musculus tyrosine 3-monooxygenasetryptophan 5-monooxygenase activation protein, beta polypeptide (Ywhab), mRNA. /PROD=tyrosine 3-monooxgenasetryptophan5-monooxgenase activation protein, beta polypeptide /FL=gb:NM_018753.1 gb:AF058797.1
1431322_at	1125	312	0.28	Igsf3	Immunoglobulin superfamily, member 3			gb:AK019524.1 /DB_XREF=gi:12859786 /FEA=mRNA /CNT=5 /TID=Mm.89706.1 /TIER=ConsEnd /STK=0 /UG=Mm.89706 /LL=78908 /UG_GENE=4833439O17Rik /UG_TITLE=RIKEN cDNA 4833439O17 gene /DEF=Mus musculus 0 day neonate head cDNA, RIKEN full-length enriched library, clone:4833439O17:unclassifiable transcript, full insert sequence.
1435206_at	1113	308	0.28	Slc24a4	Solute carrier family 24 (sodium/potassium/calcium exchanger), member 4			gb:BB767169 /DB_XREF=gi:16210049 /DB_XREF=BB767169 /CLONE=G370070E06 /FEA=EST /CNT=21 /TID=Mm.39575.1 /TIER=Stack /STK=19 /UG=Mm.39575 /LL=105022 /UG_GENE=AW492432 /UG_TITLE=expressed sequence AW492432
1440862_at	1065	299	0.28	Gpr178	G protein-coupled receptor 178	1452848_at		gb:BB629079 /DB_XREF=gi:16466328 /DB_XREF=BB629079 /CLONE=9630048P21 /FEA=EST /CNT=11 /TID=Mm.153468.1 /TIER=ConsEnd /STK=4 /UG=Mm.153468 /UG_TITLE=ESTs
1419734_at	4834	1387	0.29	Actb	Actin, beta, cytoplasmic			gb:NM_007393.1 /DB_XREF=gi:6671508 /GEN=Actb /FEA=FLmRNA /CNT=122 /TID=Mm.297.1 /TIER=FL /STK=6 /UG=Mm.297 /LL=11461 /DEF=Mus musculus actin, beta, cytoplasmic (Actb), mRNA. /PROD=actin, beta, cytoplasmic /FL=gb:J04181.1 gb:NM_007393.1
1436350_at	4167	1227	0.29	D430039N05Rik	RIKEN cDNA D430039N05 gene			gb:BM117463 /DB_XREF=gi:17080481 /DB_XREF=L0852A05-3 /CLONE=L0852A05 /FEA=EST /CNT=33 /TID=Mm.26101.2 /TIER=Stack /STK=9 /UG=Mm.26101 /UG_TITLE=ESTs
1419098_at	1049	301	0.29	Stom	Stomatin	1449341_a_at	1419099_x_at	gb:AF093620.1 /DB_XREF=gi:3747063 /FEA=FLmRNA /CNT=55 /TID=Mm.4441.1 /TIER=FL /STK=1 /UG=Mm.4441 /LL=13830 /UG_GENE=Epb7.2 /DEF=Mus musculus stomatin mRNA, complete cds. /PROD=stomatin /FL=gb:U17297.1 gb:AF093620.1 gb:NM_013515.1
1422550_a_at	3935	1178	0.3	Mtap6	Microtubule-associated protein 6			gb:NM_010837.1 /DB_XREF=gi:6754757 /GEN=Mtap6 /FEA=FLmRNA /CNT=64 /TID=Mm.86654.1 /TIER=FL+Stack /STK=39 /UG=Mm.86654 /LL=17760 /DEF=Mus musculus microtubule-associated protein 6 (Mtap6), mRNA. /PROD=microtubule-associated protein 6 /FL=gb:NM_010837.1
1437687_x_at	2854	843	0.3	Fkbp9	FK506 binding protein 9			gb:BB026630 /DB_XREF=gi:8202989 /DB_XREF=BB026630 /CLONE=5330434F12 /FEA=EST /CNT=16 /TID=Mm.20943.3 /TIER=Stack /STK=15 /UG=Mm.20943 /LL=27055 /UG_GENE=Fkbp9 /UG_TITLE=FK506 binding protein 9
1423055_at	2131	643	0.3	Nsg1	Neuron specific gene family member 1			gb:AV248094 /DB_XREF=gi:16387336 /DB_XREF=AV248094 /CLONE=4833403F23 /FEA=FLmRNA /CNT=208 /TID=Mm.7414.1 /TIER=Stack /STK=80 /UG=Mm.7414 /LL=18196 /UG_GENE=Nsg1 /UG_TITLE=neuron specific gene family member 1 /FL=gb:BC008272.1 gb:NM_010942.1 gb:AF035683.1
1431030_a_at	1688	499	0.3	Rnf149	Ring finger protein 14			gb:AK010162.1 /DB_XREF=gi:12845410 /GEN=Rnf14 /FEA=mRNA /CNT=14 /TID=Mm.22086.3 /TIER=ConsEnd /STK=0 /UG=Mm.22086 /LL=56736 /UG_TITLE=ring finger protein 14 /DEF=Mus musculus adult male tongue cDNA, RIKEN full-length enriched library, clone:2310075C09:ring finger protein 14, full insert sequence.
1439936_at	1343	398	0.3	BE949265	Transcribed locus			gb:BE949265 /DB_XREF=gi:10527024 /DB_XREF=UI-M-BH3-avf-a-04-0-UI.s1 /CLONE=UI-M-BH3-avf-a-04-0-UI /FEA=EST /CNT=7 /TID=Mm.150542.1 /TIER=ConsEnd /STK=6 /UG=Mm.150542 /UG_TITLE=ESTs
1434020_at	1210	366	0.3	Pdap1	PDGFA associated protein 1			gb:BG065186 /DB_XREF=gi:12547749 /DB_XREF=H3028C05-3 /CLONE=H3028C05 /FEA=EST /CNT=101 /TID=Mm.3360.2 /TIER=Stack /STK=9 /UG=Mm.3360 /LL=22631 /UG_GENE=Ywhaz /UG_TITLE=tyrosine 3-monooxygenasetryptophan 5-monooxygenase activation protein, zeta polypeptide
1420899_at	2025	623	0.31	Rab18	RAB18, member RAS oncogene family			gb:NM_011225.1 /DB_XREF=gi:6755257 /GEN=Rab18 /FEA=FLmRNA /CNT=210 /TID=Mm.22660.1 /TIER=FL /STK=2 /UG=Mm.22660 /LL=19330 /DEF=Mus musculus RAB18, member RAS oncogene family (Rab18), mRNA. /PROD=RAB18, member RAS oncogene family /FL=gb:L04966.1 gb:NM_011225.1
1453399_at	1753	539	0.31	Ccnt2	Cyclin T2			gb:AK013634.1 /DB_XREF=gi:12851069 /FEA=mRNA /CNT=6 /TID=Mm.206752.1 /TIER=ConsEnd /STK=4 /UG=Mm.206752 /LL=72949 /UG_GENE=Ccnt2 /UG_TITLE=cyclin T2 /DEF=Mus musculus adult male hippocampus cDNA, RIKEN full-length enriched library, clone:2900041I18:homolog to CYCLIN T2, full insert sequence.
1438682_at	1291	401	0.31	Pik3r1	Phosphatidylinositol 3-kinase, regulatory subunit, polypeptide 1 (p85 alpha)			gb:BB426164 /DB_XREF=gi:16423653 /DB_XREF=BB426164 /CLONE=C530050K14 /FEA=EST /CNT=30 /TID=Mm.9828.1 /TIER=Stack /STK=9 /UG=Mm.9828 /UG_TITLE=ESTs, Weakly similar to A48133 pre-mRNA splicing SRp75 (H.sapiens)
1423019_at	1105	345	0.31	Gja9	Gap junction membrane channel protein alpha 9			gb:NM_010290.1 /DB_XREF=gi:6753993 /GEN=Gja9 /FEA=FLmRNA /CNT=4 /TID=Mm.138256.1 /TIER=FL /STK=0 /UG=Mm.138256 /LL=14617 /DEF=Mus musculus gap junction membrane channel protein alpha 9 (Gja9), mRNA. /PROD=gap junction membrane channel protein alpha 9 /FL=gb:NM_010290.1
1426361_at	1067	334	0.31	Zc3h11a	Zinc finger CCCH type containing 11A			gb:AV328883 /DB_XREF=gi:16395976 /DB_XREF=AV328883 /CLONE=6330445D03 /FEA=FLmRNA /CNT=181 /TID=Mm.193073.1 /TIER=Stack /STK=8 /UG=Mm.193073 /UG_TITLE=Mus musculus, Similar to KIAA0663 gene product, clone MGC:6929 IMAGE:2811511, mRNA, complete cds /FL=gb:BC005786.1
1426243_at	1052	329	0.31	Cth	Cystathionase (cystathionine gamma-lyase)			gb:BC019483.1 /DB_XREF=gi:18044097 /FEA=FLmRNA /CNT=66 /TID=Mm.28301.1 /TIER=FL+Stack /STK=28 /UG=Mm.28301 /LL=70338 /UG_GENE=0610010I13Rik /DEF=Mus musculus, clone MGC:28655 IMAGE:4235178, mRNA, complete cds. /PROD=Unknown (protein for MGC:28655) /FL=gb:BC019483.1
1450966_at	4861	1565	0.32	Crot	Carnitine O-octanoyltransferase			gb:BB283187 /DB_XREF=gi:8983636 /DB_XREF=BB283187 /CLONE=A930101D22 /FEA=FLmRNA /CNT=134 /TID=Mm.28197.1 /TIER=Stack /STK=9 /UG=Mm.28197 /LL=74114 /UG_GENE=Crot /UG_TITLE=carnitine O-octanoyltransferase /FL=gb:BC012308.1 gb:NM_023733.1 gb:BC006593.1
1448676_at	4100	1329	0.32	Camk2b	Calcium/calmodulin-dependent protein kinase II, beta	1455869_at		gb:NM_007595.1 /DB_XREF=gi:6671659 /GEN=Camk2b /FEA=FLmRNA /CNT=94 /TID=Mm.4857.1 /TIER=FL+Stack /STK=48 /UG=Mm.4857 /LL=12323 /DEF=Mus musculus calciumcalmodulin-dependent protein kinase II, beta (Camk2b), mRNA. /PROD=calciumcalmodulin-dependent protein kinase II,beta /FL=gb:NM_007595.1
1438606_a_at	2055	663	0.32	Clic4	Chloride intracellular channel 4 (mitochondrial)			gb:BB814844 /DB_XREF=gi:16987473 /DB_XREF=BB814844 /CLONE=G730025P13 /FEA=EST /CNT=10 /TID=Mm.22409.3 /TIER=Stack /STK=10 /UG=Mm.22409 /LL=29876 /UG_GENE=Clic4 /UG_TITLE=chloride intracellular channel 4 (mitochondrial)
1435796_at	2041	646	0.32	C530024P05Rik	RIKEN cDNA C530024P05 gene			gb:AV280210 /DB_XREF=gi:15405712 /DB_XREF=AV280210 /CLONE=4933413A10 /FEA=EST /CNT=18 /TID=Mm.102783.1 /TIER=Stack /STK=13 /UG=Mm.102783 /UG_TITLE=ESTs
1420425_at	1563	501	0.32	Prdm1	PR domain containing 1, with ZNF domain			gb:NM_007548.1 /DB_XREF=gi:6680783 /GEN=Prdm1 /FEA=FLmRNA /CNT=16 /TID=Mm.4800.1 /TIER=FL /STK=5 /UG=Mm.4800 /LL=12142 /DEF=Mus musculus PR domain containing 1, with ZNF domain (Prdm1), mRNA. /PROD=B lymphocyte induced maturation protein /FL=gb:U08185.1 gb:NM_007548.1
1453054_at	1527	482	0.32	Scamp1	Secretory carrier membrane protein 1			gb:BB704235 /DB_XREF=gi:16053070 /DB_XREF=BB704235 /CLONE=7420461F07 /FEA=mRNA /CNT=22 /TID=Mm.87364.1 /TIER=Stack /STK=10 /UG=Mm.87364 /LL=107767 /UG_GENE=Scamp1 /UG_TITLE=secretory carrier membrane protein 1
1418764_a_at	1491	476	0.32	Bpnt1	Bisphosphate 3'-nucleotidase 1			gb:NM_011794.1 /DB_XREF=gi:6753203 /GEN=Bpnt1 /FEA=FLmRNA /CNT=88 /TID=Mm.18096.1 /TIER=FL+Stack /STK=18 /UG=Mm.18096 /LL=23827 /DEF=Mus musculus bisphosphate 3-nucleotidase 1 (Bpnt1), mRNA. /PROD=bisphosphate 3-nucleotidase 1 /FL=gb:NM_011794.1 gb:AF125043.1 gb:BC011036.1
1454666_at	1409	451	0.32	Klf3	Kruppel-like factor 3 (basic)			gb:AV230488 /DB_XREF=gi:15404964 /DB_XREF=AV230488 /CLONE=4631432G23 /FEA=EST /CNT=120 /TID=Mm.30693.1 /TIER=Stack /STK=79 /UG=Mm.30693 /UG_TITLE=ESTs, Weakly similar to simple repeat sequence-containing transcript (Mus musculus) (M.musculus)
1416541_at	1328	420	0.32	Clpb	ClpB caseinolytic peptidase B homolog (E. coli)			gb:NM_009191.1 /DB_XREF=gi:6677982 /GEN=Skd3 /FEA=FLmRNA /CNT=120 /TID=Mm.3990.1 /TIER=FL+Stack /STK=83 /UG=Mm.3990 /LL=20480 /DEF=Mus musculus suppressor of K+ transport defect 3 (Skd3), mRNA. /PROD=suppressor of K+ transport defect 3 /FL=gb:NM_009191.1 gb:U09874.1
1416837_at	1159	374	0.32	Bax	Bcl2-associated X protein			gb:BC018228.1 /DB_XREF=gi:17390521 /FEA=FLmRNA /CNT=92 /TID=Mm.19904.1 /TIER=FL+Stack /STK=67 /UG=Mm.19904 /LL=12028 /UG_GENE=Bax /DEF=Mus musculus, Bcl2-associated X protein, clone MGC:11739 IMAGE:3968903, mRNA, complete cds. /PROD=Bcl2-associated X protein /FL=gb:BC018228.1 gb:L22472.1 gb:NM_007527.1
1452259_at	1145	362	0.32	Phf20	PHD finger protein 20			gb:BB308157 /DB_XREF=gi:15411380 /DB_XREF=BB308157 /CLONE=B230218M23 /FEA=mRNA /CNT=192 /TID=Mm.18898.1 /TIER=Stack /STK=8 /UG=Mm.18898 /UG_TITLE=Mus musculus, clone IMAGE:3709746, mRNA, partial cds
1449262_s_at	1037	332	0.32	Lin7c	Lin-7 homolog C (C. elegans)			gb:BB704337 /DB_XREF=gi:16053172 /DB_XREF=BB704337 /CLONE=7420462M20 /FEA=FLmRNA /CNT=61 /TID=Mm.218854.1 /TIER=ConsEnd /STK=1 /UG=Mm.218854 /LL=22343 /UG_GENE=Veli3-pending /UG_TITLE=vertebrate homolog of C. elegans Lin-7 type 3 /FL=gb:AF087695.1 gb:NM_011699.1
1451094_at	1030	334	0.32	Ggtl3	Gamma-glutamyltransferase-like 3			gb:BC005772.1 /DB_XREF=gi:13543208 /FEA=FLmRNA /CNT=141 /TID=Mm.41757.1 /TIER=FL+Stack /STK=128 /UG=Mm.41757 /DEF=Mus musculus, clone MGC:12004 IMAGE:3602314, mRNA, complete cds. /PROD=Unknown (protein for MGC:12004) /FL=gb:BC005772.1
1434709_at	4445	1481	0.33	C130076O07Rik	RIKEN cDNA C130076O07 gene	1442587_at		gb:BB202655 /DB_XREF=gi:16271742 /DB_XREF=BB202655 /CLONE=A430048C07 /FEA=EST /CNT=37 /TID=Mm.37263.1 /TIER=Stack /STK=26 /UG=Mm.37263 /UG_TITLE=ESTs, Weakly similar to L1 cell adhesion molecule (Mus musculus) (M.musculus)
1435204_at	2819	944	0.33	Prmt8	Protein arginine N-methyltransferase 8			gb:BG065273 /DB_XREF=gi:12547836 /DB_XREF=H3029B12-3 /CLONE=H3029B12 /FEA=EST /CNT=23 /TID=Mm.39750.1 /TIER=Stack /STK=19 /UG=Mm.39750 /UG_TITLE=ESTs, Moderately similar to ANM1_MOUSE PROTEIN ARGININE N-METHYLTRANSFERASE 1 (M.musculus)
1431213_a_at	2519	836	0.33	Chd9	Chromodomain helicase DNA binding protein 9			gb:BG297038 /DB_XREF=gi:13060290 /DB_XREF=602394895F1 /CLONE=IMAGE:4506814 /FEA=mRNA /CNT=9 /TID=Mm.157900.1 /TIER=ConsEnd /STK=0 /UG=Mm.157900 /LL=67527 /UG_GENE=1300007C21Rik /UG_TITLE=RIKEN cDNA 1300007C21 gene
1442254_at	2062	675	0.33	Dgkd	Diacylglycerol kinase, delta	1443781_at		gb:BB366659 /DB_XREF=gi:16406457 /DB_XREF=BB366659 /CLONE=C130034I19 /FEA=EST /CNT=5 /TID=Mm.207501.1 /TIER=ConsEnd /STK=3 /UG=Mm.207501 /UG_TITLE=ESTs
1449137_at	1756	582	0.33	Pdha1	Pyruvate dehydrogenase E1 alpha 1			gb:NM_008810.1 /DB_XREF=gi:6679260 /GEN=Pdha1 /FEA=FLmRNA /CNT=422 /TID=Mm.34775.1 /TIER=FL+Stack /STK=21 /UG=Mm.34775 /LL=18597 /DEF=Mus musculus pyruvate dehydrogenase E1 alpha 1 (Pdha1), mRNA. /PROD=pyruvate dehydrogenase E1 alpha 1 /FL=gb:NM_008810.1 gb:M76727.1 gb:BC007142.1
1421895_at	1755	575	0.33	Eif2s3x	Eukaryotic translation initiation factor 2, subunit 3, structural gene X-linked			gb:NM_012010.1 /DB_XREF=gi:6753737 /GEN=Eif2s3x /FEA=FLmRNA /CNT=65 /TID=Mm.218851.1 /TIER=FL /STK=1 /UG=Mm.218851 /LL=26905 /DEF=Mus musculus eukaryotic translation initiation factor 2, subunit 3, structural gene X-linked (Eif2s3x), mRNA. /PROD=eukaryotic translation initiation factor 2,subunit 3, structural gene X-linked /FL=gb:NM_012010.1
1417136_s_at	1607	525	0.33	Srpk2	Serine/arginine-rich protein specific kinase 2			gb:BG805074 /DB_XREF=gi:17952002 /DB_XREF=0612-12 /FEA=FLmRNA /CNT=188 /TID=Mm.8709.1 /TIER=Stack /STK=35 /UG=Mm.8709 /LL=20817 /UG_GENE=Srpk2 /UG_TITLE=serinearginine-rich protein specific kinase 2 /FL=gb:AB006036.1 gb:BC020178.1 gb:NM_009274.1
1429321_at	1256	414	0.33	Rnf149	Ring finger protein 149			gb:T12280 /DB_XREF=gi:571317 /DB_XREF=EST0007 /CLONE=GM2A12 /FEA=mRNA /CNT=153 /TID=Mm.28614.1 /TIER=Stack /STK=43 /UG=Mm.28614 /LL=67702 /UG_GENE=1600023E10Rik /UG_TITLE=RIKEN cDNA 1600023E10 gene
1438677_at	1110	372	0.33	Pkp4	Plakophilin 4			gb:AW764208 /DB_XREF=gi:7696158 /DB_XREF=ur72f02.x1 /CLONE=IMAGE:3155835 /FEA=EST /CNT=74 /TID=Mm.153748.2 /TIER=Stack /STK=9 /UG=Mm.153748 /LL=67756 /UG_GENE=5031422I09Rik /UG_TITLE=RIKEN cDNA 5031422I09 gene
1439200_x_at	794	16	0.02	Erdr1	Erythroid differentiation regulator 1			gb:BE686792 /DB_XREF=gi:10074416 /DB_XREF=uu66g08.x1 /CLONE=IMAGE:3376958 /FEA=EST /CNT=10 /TID=Mm.35829.4 /TIER=Stack /STK=8 /UG=Mm.35829 /LL=170942 /UG_GENE=edr /UG_TITLE=erythroid differentiation regulator
1426009_a_at	780	17	0.02	Pip5k1b	Phosphatidylinositol-4-phosphate 5-kinase, type 1 beta	1435039_a_at	1455191_x_at	gb:BC003763.1 /DB_XREF=gi:13277731 /FEA=FLmRNA /CNT=1 /TID=Mm.87521.2 /TIER=FL /STK=1 /UG=Mm.87521 /LL=18720 /UG_GENE=Pip5k1b /DEF=Mus musculus, Similar to phosphatidylinositol-4-phosphate 5-kinase, type 1 beta, clone MGC:5928 IMAGE:3591003, mRNA, complete cds. /PROD=Similar to phosphatidylinositol-4-phosphate5-kinase, type 1 beta /FL=gb:BC003763.1
1421621_at	289	13	0.04	Rasgrf2	RAS protein-specific guanine nucleotide-releasing factor 2			gb:NM_009027.2 /DB_XREF=gi:7242198 /GEN=Rasgrf2 /FEA=FLmRNA /CNT=3 /TID=Mm.57233.1 /TIER=FL /STK=2 /UG=Mm.57233 /LL=19418 /DEF=Mus musculus RAS protein-specific guanine nucleotide-releasing factor 2 (Rasgrf2), mRNA. /PROD=RAS protein-specific guaninenucleotide-releasing factor 2 /FL=gb:NM_009027.2 gb:U67326.2
1443933_at	278	12	0.04	Mtac2d1	Membrane targeting (tandem) C2 domain containing 1			gb:BB548141 /DB_XREF=gi:16447647 /DB_XREF=BB548141 /CLONE=E230003N02 /FEA=EST /CNT=12 /TID=Mm.139182.1 /TIER=ConsEnd /STK=2 /UG=Mm.139182 /UG_TITLE=ESTs, Weakly similar to elongation factor SIII p15 subunit (Rattus norvegicus) (R.norvegicus)
1425808_a_at	275	11	0.04	Myocd	Myocardin	1425978_at		gb:AF437877.1 /DB_XREF=gi:16904810 /GEN=BSAC2A /FEA=FLmRNA /CNT=6 /TID=Mm.32257.1 /TIER=FL /STK=1 /UG=Mm.32257 /DEF=Mus musculus myocardin A (BSAC2A) mRNA, complete cds, alternatively spliced. /PROD=myocardin A /FL=gb:AF437877.1
1426605_at	193	9	0.05	Brcc3	BRCA1/BRCA2-containing complex, subunit 3			gb:BB178745 /DB_XREF=gi:15409367 /DB_XREF=BB178745 /CLONE=A230075K09 /FEA=FLmRNA /CNT=53 /TID=Mm.30557.9 /TIER=ConsEnd /STK=1 /UG=Mm.30557 /LL=21473 /UG_GENE=Tcra /UG_TITLE=T-cell receptor alpha chain /FL=gb:BC021313.1
1422040_at	133	6	0.05	Sema7a	Sema domain, immunoglobulin domain (Ig), and GPI membrane anchor, (semaphorin) 7A			gb:AF176670.1 /DB_XREF=gi:5823360 /GEN=CDw108 /FEA=FLmRNA /CNT=11 /TID=Mm.42028.1 /TIER=FL /STK=1 /UG=Mm.42028 /LL=20361 /DEF=Mus musculus GPI-anchored membrane protein CDw108 precursor (CDw108) mRNA, complete cds. /PROD=GPI-anchored membrane protein CDw108 precursor /FL=gb:NM_011352.1 gb:AF176670.1 gb:AB017532.1
1441809_at	937	55	0.06	A930009A15Rik	RIKEN cDNA A930009A15 gene			gb:BB805891 /DB_XREF=gi:16978520 /DB_XREF=BB805891 /CLONE=G630071N19 /FEA=EST /CNT=4 /TID=Mm.146654.1 /TIER=ConsEnd /STK=4 /UG=Mm.146654 /UG_TITLE=ESTs
1454056_at	162	12	0.07	9030407P20Rik	RIKEN cDNA 9030407P20 gene			gb:AK018490.1 /DB_XREF=gi:12858215 /FEA=mRNA /CNT=1 /TID=Mm.138127.1 /TIER=ConsEnd /STK=0 /UG=Mm.138127 /LL=71568 /UG_GENE=9030407P20Rik /UG_TITLE=RIKEN cDNA 9030407P20 gene /DEF=Mus musculus adult male colon cDNA, RIKEN full-length enriched library, clone:9030407P20:unclassifiable transcript, full insert sequence.
1450131_a_at	543	46	0.08	Bspry	B-box and SPRY domain containing			gb:NM_138653.1 /DB_XREF=gi:20149729 /GEN=Bspry-pending /FEA=FLmRNA /CNT=30 /TID=Mm.29808.1 /TIER=FL /STK=2 /UG=Mm.29808 /LL=192120 /DEF=Mus musculus B-box and SPRY domain containing (Bspry-pending), mRNA. /PROD=B-box and SPRY domain containing /FL=gb:NM_138653.1
1415997_at	245	19	0.08	Txnip	Thioredoxin interacting protein			gb:AF173681.1 /DB_XREF=gi:5726646 /FEA=FLmRNA /CNT=320 /TID=Mm.77432.1 /TIER=FL /STK=1 /UG=Mm.77432 /LL=56338 /UG_GENE=Txnip /DEF=Mus musculus thioredoxin interacting factor mRNA, complete cds. /PROD=thioredoxin interacting factor /FL=gb:NM_023719.1 gb:BC011212.1 gb:AF173681.1 gb:AF282826.1
1447191_at	101	9	0.08	AI317237	Expressed sequence AI317237			gb:AI875120 /DB_XREF=gi:5549169 /DB_XREF=ul29g01.x1 /CLONE=IMAGE:2099760 /FEA=EST /CNT=2 /TID=Mm.139154.1 /TIER=ConsEnd /STK=2 /UG=Mm.139154 /UG_TITLE=ESTs
1431471_at	100	8	0.08	Dach1	Dachshund 1 (Drosophila)			gb:AV251009 /DB_XREF=gi:6238468 /DB_XREF=AV251009 /CLONE=4833428M15 /FEA=mRNA /CNT=3 /TID=Mm.159832.1 /TIER=ConsEnd /STK=2 /UG=Mm.159832 /LL=77030 /UG_GENE=4833428M15Rik /UG_TITLE=RIKEN cDNA 4833428M15 gene
1420816_at	617	58	0.09	Ywhag	3-monooxygenase/tryptophan 5-monooxygenase activation protein, gamma polypeptide			gb:NM_018871.1 /DB_XREF=gi:9256645 /GEN=Ywhag /FEA=FLmRNA /CNT=359 /TID=Mm.29717.1 /TIER=FL /STK=2 /UG=Mm.29717 /LL=22628 /DEF=Mus musculus 3-monooxgenasetryptophan 5-monooxgenase activation protein, gamma polypeptide (Ywhag), mRNA. /PROD=tyrosine 3-monooxygenasetryptophan5-monooxygenase activation protein, gamma polypeptide /FL=gb:BC008129.1 gb:NM_018871.1 gb:AF058799.1
1423971_at	468	44	0.09	Thoc3	THO complex 3			gb:BE335845 /DB_XREF=gi:9209621 /DB_XREF=us23e09.x1 /CLONE=IMAGE:3167944 /FEA=FLmRNA /CNT=156 /TID=Mm.41531.1 /TIER=Stack /STK=14 /UG=Mm.41531 /LL=73666 /UG_GENE=2410044K02Rik /UG_TITLE=RIKEN cDNA 2410044K02 gene /FL=gb:BC019603.1
1418868_at	466	40	0.09	En2	Engrailed 2			gb:NM_010134.1 /DB_XREF=gi:6753751 /GEN=En2 /FEA=FLmRNA /CNT=26 /TID=Mm.4298.1 /TIER=FL+Stack /STK=17 /UG=Mm.4298 /LL=13799 /DEF=Mus musculus engrailed 2 (En2), mRNA. /PROD=engrailed 2 /FL=gb:NM_010134.1 gb:L12705.1
1425851_a_at	220	20	0.09	Amigo1	Adhesion molecule with Ig like domain 1			gb:BC022907.1 /DB_XREF=gi:18606130 /FEA=FLmRNA /CNT=3 /TID=Mm.153435.1 /TIER=FL /STK=1 /UG=Mm.153435 /DEF=Mus musculus, clone MGC:25558 IMAGE:3980456, mRNA, complete cds. /PROD=Unknown (protein for MGC:25558) /FL=gb:BC022907.1
1437361_at	153	14	0.09	A430060F13Rik	RIKEN cDNA A430060F13 gene			gb:BM214171 /DB_XREF=gi:17772256 /DB_XREF=C0846H08-3 /CLONE=C0846H08 /FEA=EST /CNT=23 /TID=Mm.24063.1 /TIER=Stack /STK=19 /UG=Mm.24063 /LL=97749 /UG_GENE=C86086 /UG_TITLE=expressed sequence C86086
1429643_a_at	134	12	0.09	Pde1c	Phosphodiesterase 1C			gb:AK017183.1 /DB_XREF=gi:12856299 /FEA=mRNA /CNT=17 /TID=Mm.5145.3 /TIER=Stack /STK=12 /UG=Mm.5145 /LL=18575 /UG_GENE=Pde1c /UG_TITLE=phosphodiesterase 1C /DEF=Mus musculus 11 days pregnant adult female ovary and uterus cDNA, RIKEN full-length enriched library, clone:5033421F10:phosphodiesterase 1C, full insert sequence.
1438043_at	118	10	0.09	Hmg20a	High mobility group 20A			gb:BE987325 /DB_XREF=gi:10662563 /DB_XREF=UI-M-CG0p-bgw-g-01-0-UI.s1 /CLONE=UI-M-CG0p-bgw-g-01-0-UI /FEA=EST /CNT=19 /TID=Mm.80689.1 /TIER=Stack /STK=12 /UG=Mm.80689 /UG_TITLE=ESTs, Weakly similar to RIKEN cDNA 5730493B19 (Mus musculus) (M.musculus)
1452928_at	391	38	0.1	Abi3	ABI gene family, member 3			gb:AK008928.1 /DB_XREF=gi:12843411 /FEA=mRNA /CNT=51 /TID=Mm.58065.1 /TIER=Stack /STK=19 /UG=Mm.58065 /LL=66610 /UG_GENE=2210414K06Rik /UG_TITLE=RIKEN cDNA 2210414K06 gene /DEF=Mus musculus adult male stomach cDNA, RIKEN full-length enriched library, clone:2210414K06:homolog to human NESH which encodes a putative signaling molecule similar to e3B1 protein, full insert sequence.
1421285_at	199	21	0.1	Pik3ap1	Phosphoinositide-3-kinase adaptor protein 1	1429831_at		gb:NM_031376.1 /DB_XREF=gi:13878194 /GEN=Pik3ap1 /FEA=FLmRNA /CNT=17 /TID=Mm.190800.1 /TIER=FL /STK=2 /UG=Mm.190800 /LL=83490 /DEF=Mus musculus phosphoinositide-3-kinase adaptor protein 1 (Pik3ap1), mRNA. /PROD=phosphoinositide-3-kinase adaptor protein 1 /FL=gb:NM_031376.1 gb:AF293806.1
1427597_at	135	14	0.1	Plekhh2	Pleckstrin homology domain containing, family H (with MyTH4 domain) member 2			gb:BC021518.1 /DB_XREF=gi:18204840 /FEA=mRNA /CNT=3 /TID=Mm.215159.1 /TIER=ConsEnd /STK=0 /UG=Mm.215159 /DEF=Mus musculus, clone IMAGE:5352356, mRNA, partial cds. /PROD=Unknown (protein for IMAGE:5352356)
1431274_a_at	358	41	0.11	Hspa9a	Heat shock protein 9A			gb:AA543265 /DB_XREF=gi:2291742 /DB_XREF=vj80f09.r1 /CLONE=IMAGE:935369 /FEA=mRNA /CNT=6 /TID=Mm.2849.2 /TIER=ConsEnd /STK=0 /UG=Mm.2849 /LL=15526 /UG_GENE=Hspa9a /UG_TITLE=heat shock protein, 74 kDa, A
1431675_a_at	329	38	0.11	Gtf2i	General transcription factor II i	1431676_x_at		gb:AK006796.1 /DB_XREF=gi:12840052 /GEN=Gtf2i /FEA=mRNA /CNT=2 /TID=Mm.22593.5 /TIER=ConsEnd /STK=1 /UG=Mm.22593 /LL=14886 /UG_TITLE=general transcription factor II I /DEF=Mus musculus adult male testis cDNA, RIKEN full-length enriched library, clone:1700055I01:general transcription factor II I, full insert sequence.
1421727_at	213	24	0.11	Eya1	Eyes absent 1 homolog (Drosophila)	1457424_at	1443117_at	gb:NM_010164.1 /DB_XREF=gi:6753791 /GEN=Eya1 /FEA=FLmRNA /CNT=2 /TID=Mm.13854.1 /TIER=FL /STK=2 /UG=Mm.13854 /LL=14048 /DEF=Mus musculus eyes absent 1 homolog (Drosophila) (Eya1), mRNA. /PROD=eyes absent 1 homolog (Drosophila) /FL=gb:U61110.1 gb:NM_010164.1
1448256_at	163	17	0.11	Gosr1	Golgi SNAP receptor complex member 1			gb:NM_016810.1 /DB_XREF=gi:7949042 /GEN=Gosr1 /FEA=FLmRNA /CNT=170 /TID=Mm.20931.1 /TIER=FL /STK=4 /UG=Mm.20931 /LL=53334 /DEF=Mus musculus golgi SNAP receptor complex member 1 (Gosr1), mRNA. /PROD=golgi SNAP receptor complex member 1 /FL=gb:BC008542.1 gb:NM_016810.1 gb:AF079901.1
1435365_at	115	12	0.11	4732415M23Rik	RIKEN cDNA 4732415M23 gene			gb:BB614874 /DB_XREF=gi:16455205 /DB_XREF=BB614874 /CLONE=4930403E08 /FEA=EST /CNT=24 /TID=Mm.23791.1 /TIER=Stack /STK=17 /UG=Mm.23791 /LL=102159 /UG_GENE=AI847264 /UG_TITLE=expressed sequence AI847264
1451917_a_at	103	11	0.11	Dcamkl1	Double cortin and calcium/calmodulin-dependent protein kinase-like 1			gb:AF155820.1 /DB_XREF=gi:6716519 /GEN=Dcl /FEA=FLmRNA /CNT=1 /TID=Mm.44752.4 /TIER=FL /STK=1 /UG=Mm.44752 /LL=13175 /DEF=Mus musculus doublecortin-like protein (Dcl) mRNA, complete cds. /PROD=doublecortin-like protein /FL=gb:AF155820.1
1454020_at	681	82	0.12	4930554H23Rik	RIKEN cDNA 4930554H23 gene			gb:AK019764.1 /DB_XREF=gi:12860096 /FEA=mRNA /CNT=1 /TID=Mm.159962.1 /TIER=ConsEnd /STK=0 /UG=Mm.159962 /LL=77631 /UG_GENE=4930554H23Rik /UG_TITLE=RIKEN cDNA 4930554H23 gene /DEF=Mus musculus adult male testis cDNA, RIKEN full-length enriched library, clone:4930554H23:unclassifiable, full insert sequence.
1437302_at	270	31	0.12	Adrb2	Adrenergic receptor, beta 2			gb:AV083350 /DB_XREF=gi:16381227 /DB_XREF=AV083350 /CLONE=2310002E14 /FEA=EST /CNT=39 /TID=Mm.5598.1 /TIER=Stack /STK=20 /UG=Mm.5598 /UG_TITLE=ESTs, Highly similar to BETA-2 ADRENERGIC RECEPTOR (M.musculus)
1418909_at	268	33	0.12	Ermap	Erythroblast membrane-associated protein			gb:NM_013848.1 /DB_XREF=gi:7305040 /GEN=Ermap /FEA=FLmRNA /CNT=44 /TID=Mm.24043.1 /TIER=FL+Stack /STK=16 /UG=Mm.24043 /LL=27028 /DEF=Mus musculus erythroblast membrane-associated protein (Ermap), mRNA. /PROD=erythroblast membrane-associated protein /FL=gb:NM_013848.1 gb:AF153906.1
1437047_at	198	23	0.12	Zfp664	Zinc finger protein 664			gb:BB527190 /DB_XREF=gi:16444440 /DB_XREF=BB527190 /CLONE=D930038J03 /FEA=EST /CNT=32 /TID=Mm.138617.1 /TIER=Stack /STK=28 /UG=Mm.138617 /UG_TITLE=ESTs
1437781_at	114	14	0.12	BB180869	Transcribed locus			gb:BB180869 /DB_XREF=gi:16270031 /DB_XREF=BB180869 /CLONE=A230087K08 /FEA=EST /CNT=16 /TID=Mm.114886.1 /TIER=Stack /STK=14 /UG=Mm.114886 /UG_TITLE=ESTs
1443238_at	163	21	0.13	Phf14	PHD finger protein 14			gb:BB370461 /DB_XREF=gi:16406876 /DB_XREF=BB370461 /CLONE=C130053G19 /FEA=EST /CNT=3 /TID=Mm.209048.1 /TIER=ConsEnd /STK=3 /UG=Mm.209048 /UG_TITLE=ESTs
1450471_at	153	20	0.13	Smad3	MAD homolog 3 (Drosophila)			gb:AB008192.1 /DB_XREF=gi:4630836 /GEN=smad3 /FEA=FLmRNA /CNT=19 /TID=Mm.7320.1 /TIER=FL /STK=1 /UG=Mm.7320 /LL=17127 /DEF=Mus musculus mRNA for mSmad3, complete cds. /PROD=mSmad3 /FL=gb:AF016189.1 gb:AB008192.1 gb:NM_016769.1
1423522_at	132	17	0.13	Npm3	Nucleoplasmin 3			gb:BB811478 /DB_XREF=gi:16984107 /DB_XREF=BB811478 /CLONE=G730010E06 /FEA=FLmRNA /CNT=75 /TID=Mm.1406.1 /TIER=Stack /STK=13 /UG=Mm.1406 /LL=18150 /UG_GENE=Npm3 /UG_TITLE=nucleoplasmin 3 /FL=gb:U64450.1 gb:NM_008723.1
1453584_at	114	15	0.13	Stk36	Serine/threonine kinase 36 (fused homolog, Drosophila)			gb:AK007188.1 /DB_XREF=gi:12840591 /FEA=mRNA /CNT=11 /TID=Mm.31304.1 /TIER=ConsEnd /STK=1 /UG=Mm.31304 /LL=73581 /UG_GENE=1700112N14Rik /UG_TITLE=RIKEN cDNA 1700112N14 gene /DEF=Mus musculus adult male testis cDNA, RIKEN full-length enriched library, clone:1700112N14:homolog to FUSED SERINETHREONINE KINASE, full insert sequence.
1415959_at	109	14	0.13	Slc2a4	Solute carrier family 2 (facilitated glucose transporter), member 4			gb:AB008453.1 /DB_XREF=gi:9392289 /GEN=GLUT4 /FEA=FLmRNA /CNT=210 /TID=Mm.10661.1 /TIER=FL /STK=1 /UG=Mm.10661 /LL=20528 /DEF=Mus musculus GLUT4 mRNA for Glucose transporter 4, complete cds. /PROD=Glucose transporter 4 /FL=gb:NM_009204.1 gb:AB008453.1 gb:M23383.1 gb:BC014282.1
1419568_at	789	110	0.14	Mapk1	Mitogen activated protein kinase 1			gb:NM_011949.1 /DB_XREF=gi:6754631 /GEN=Mapk1 /FEA=FLmRNA /CNT=46 /TID=Mm.196581.1 /TIER=FL+Stack /STK=8 /UG=Mm.196581 /LL=26413 /DEF=Mus musculus mitogen activated protein kinase 1 (Mapk1), mRNA. /PROD=mitogen activated protein kinase 1 /FL=gb:D10939.1 gb:NM_011949.1
1422919_at	502	71	0.14	Hrasls	HRAS-like suppressor			gb:NM_013751.1 /DB_XREF=gi:7305156 /GEN=Hrasrs-pending /FEA=FLmRNA /CNT=11 /TID=Mm.103650.1 /TIER=FL /STK=7 /UG=Mm.103650 /LL=27281 /DEF=Mus musculus Harvey rat sarcoma virus oncogene relatedsuppressor (Hrasrs-pending), mRNA. /PROD=Harvey rat sarcoma virus oncogenerelatedsuppressor /FL=gb:NM_013751.1 gb:AF163095.1
1440396_at	467	64	0.14	Mpp6	Membrane protein, palmitoylated 6 (MAGUK p55 subfamily member 6)	1449348_at	1441546_at	gb:BG075893 /DB_XREF=gi:12558462 /DB_XREF=H3153A11-3 /CLONE=H3153A11 /FEA=EST /CNT=6 /TID=Mm.102831.1 /TIER=ConsEnd /STK=5 /UG=Mm.102831 /UG_TITLE=ESTs
1444552_at	390	56	0.14	BB730792	Transcribed locus			gb:BB730792 /DB_XREF=gi:16114067 /DB_XREF=BB730792 /CLONE=E860130C01 /FEA=EST /CNT=4 /TID=Mm.218148.1 /TIER=ConsEnd /STK=2 /UG=Mm.218148 /UG_TITLE=ESTs, Weakly similar to TYROSINE-PROTEIN KINASE JAK3 (M.musculus)
1424098_at	303	43	0.14	Elovl7	ELOVL family member 7, elongation of long chain fatty acids (yeast)	1440312_at	1441891_x_at	gb:BB667372 /DB_XREF=gi:16398821 /DB_XREF=BB667372 /CLONE=C730006F01 /FEA=FLmRNA /CNT=102 /TID=Mm.41397.1 /TIER=Stack /STK=14 /UG=Mm.41397 /LL=74559 /UG_GENE=9130013K24Rik /UG_TITLE=RIKEN cDNA 9130013K24 gene /FL=gb:BC005602.1
1417613_at	161	23	0.14	Ier5	Immediate early response 5			gb:BF147705 /DB_XREF=gi:11029100 /DB_XREF=us40a02.x1 /CLONE=IMAGE:3169514 /FEA=FLmRNA /CNT=149 /TID=Mm.12246.1 /TIER=Stack /STK=15 /UG=Mm.12246 /LL=15939 /UG_GENE=Ier5 /UG_TITLE=immediate early response 5 /FL=gb:AF079527.1 gb:NM_010500.1
1456792_at	130	18	0.14	Tbc1d2	TBC1 domain family, member 2			gb:BG967046 /DB_XREF=gi:14354683 /DB_XREF=602834282F1 /CLONE=IMAGE:4988516 /FEA=EST /CNT=11 /TID=Mm.212730.1 /TIER=ConsEnd /STK=7 /UG=Mm.212730 /UG_TITLE=ESTs, Moderately similar to T48686 hypothetical protein DKFZp761D1823.1 (H.sapiens)
1441795_at	110	16	0.14	Snapc4	Small nuclear RNA activating complex, polypeptide 4			gb:BF227278 /DB_XREF=gi:11135213 /DB_XREF=uz22a08.x1 /CLONE=IMAGE:3669782 /FEA=EST /CNT=4 /TID=Mm.153251.1 /TIER=ConsEnd /STK=4 /UG=Mm.153251 /UG_TITLE=ESTs, Weakly similar to I49497 transforming protein A-myb - mouse (M.musculus)
1457284_at	919	137	0.15	BB766038	CDNA clone IMAGE:5256843			gb:BB766038 /DB_XREF=gi:16208999 /DB_XREF=BB766038 /CLONE=G370060B20 /FEA=EST /CNT=12 /TID=Mm.45553.1 /TIER=ConsEnd /STK=4 /UG=Mm.45553 /UG_TITLE=ESTs
1430984_at	919	134	0.15	Azin1	Antizyme inhibitor 1			gb:BI155585 /DB_XREF=gi:14615586 /DB_XREF=602903994F1 /CLONE=IMAGE:5033639 /FEA=mRNA /CNT=35 /TID=Mm.196297.1 /TIER=ConsEnd /STK=0 /UG=Mm.196297 /LL=73525 /UG_GENE=1700085L02Rik /UG_TITLE=RIKEN cDNA 1700085L02 gene
1423146_at	230	35	0.15	Hes5	Hairy and enhancer of split 5 (Drosophila)			gb:AV337579 /DB_XREF=gi:16396501 /DB_XREF=AV337579 /CLONE=6430402A09 /FEA=FLmRNA /CNT=47 /TID=Mm.137268.1 /TIER=Stack /STK=40 /UG=Mm.137268 /LL=15208 /UG_GENE=Hes5 /UG_TITLE=hairy and enhancer of split 5, (Drosophila) /FL=gb:NM_010419.1
1416875_at	157	23	0.15	Parvg	Parvin, gamma			gb:BC011200.1 /DB_XREF=gi:15029936 /FEA=FLmRNA /CNT=86 /TID=Mm.202348.1 /TIER=FL+Stack /STK=66 /UG=Mm.202348 /LL=64099 /UG_GENE=Parvg /DEF=Mus musculus, gamma-parvin, clone MGC:18790 IMAGE:4190510, mRNA, complete cds. /PROD=gamma-parvin /FL=gb:AF312712.1 gb:NM_022321.1 gb:BC011200.1
1440776_at	149	22	0.15	3732412D22Rik	RIKEN cDNA 3732412D22 gene			gb:BB709234 /DB_XREF=gi:16062403 /DB_XREF=BB709234 /CLONE=A930104J09 /FEA=EST /CNT=5 /TID=Mm.208624.1 /TIER=ConsEnd /STK=5 /UG=Mm.208624 /UG_TITLE=ESTs
1419730_at	961	158	0.16	4631427C17Rik	RIKEN cDNA 4631427C17 gene			gb:NM_021414.1 /DB_XREF=gi:10946773 /GEN=4631427C17Rik /FEA=FLmRNA /CNT=11 /TID=Mm.28589.1 /TIER=FL /STK=7 /UG=Mm.28589 /LL=74340 /DEF=Mus musculus RIKEN cDNA 4631427C17 gene (4631427C17Rik), mRNA. /PROD=RIKEN cDNA 4631427C17 /FL=gb:NM_021414.1
1449578_at	627	101	0.16	Supt16h	Suppressor of Ty 16 homolog (S. cerevisiae)			gb:AW536705 /DB_XREF=gi:7179122 /DB_XREF=G0107G09-3 /CLONE=G0107G09 /FEA=FLmRNA /CNT=92 /TID=Mm.45286.1 /TIER=Stack /STK=45 /UG=Mm.45286 /LL=114741 /UG_GENE=Supt16h /UG_TITLE=suppressor of Ty 16 homolog (S.cerevisiae) /FL=gb:NM_033618.1 gb:BC012433.1 gb:AF323667.1
1422135_at	453	74	0.16	Capns1	Calpain, small subunit 1			gb:NM_011980.1 /DB_XREF=gi:6756046 /GEN=Zfp146 /FEA=FLmRNA /CNT=9 /TID=Mm.42054.1 /TIER=FL /STK=1 /UG=Mm.42054 /LL=26465 /DEF=Mus musculus zinc finger protein 146 (Zfp146), mRNA. /PROD=zinc finger protein 146 /FL=gb:NM_011980.1
1423660_at	269	43	0.16	Ctdsp2	CTD (carboxy-terminal domain, RNA polymerase II, polypeptide A) small phosphatase 2			gb:BB294133 /DB_XREF=gi:16401748 /DB_XREF=BB294133 /CLONE=B130024D01 /FEA=FLmRNA /CNT=336 /TID=Mm.29490.1 /TIER=Stack /STK=9 /UG=Mm.29490 /UG_TITLE=Mus musculus, Similar to conserved gene amplified in osteosarcoma, clone MGC:38258 IMAGE:5324816, mRNA, complete cds /FL=gb:BC025650.1
1432790_at	247	39	0.16	Lrba	LPS-responsive beige-like anchor			gb:AV370470 /DB_XREF=gi:6418117 /DB_XREF=AV370470 /CLONE=9030218A15 /FEA=mRNA /CNT=2 /TID=Mm.159968.1 /TIER=ConsEnd /STK=1 /UG=Mm.159968 /LL=77662 /UG_GENE=9030218A15Rik /UG_TITLE=RIKEN cDNA 9030218A15 gene
1446877_at	137	22	0.16	C87490	Expressed sequence C87490			gb:BB381622 /DB_XREF=gi:16408012 /DB_XREF=BB381622 /CLONE=C230014O12 /FEA=EST /CNT=2 /TID=Mm.125817.1 /TIER=ConsEnd /STK=2 /UG=Mm.125817 /UG_TITLE=ESTs
1440191_s_at	134	22	0.16	Leng9	Leukocyte receptor cluster (LRC) member 9			gb:AI847494 /DB_XREF=gi:5491400 /DB_XREF=UI-M-AI1-afs-h-03-0-UI.s1 /CLONE=UI-M-AI1-afs-h-03-0-UI /FEA=EST /CNT=16 /TID=Mm.45066.1 /TIER=ConsEnd /STK=5 /UG=Mm.45066 /UG_TITLE=ESTs
1432356_at	122	19	0.16	170056N10Rik	Riken cDNA 1700056N10 gene			gb:AK006816.1 /DB_XREF=gi:12840084 /FEA=mRNA /CNT=1 /TID=Mm.159003.1 /TIER=ConsEnd /STK=0 /UG=Mm.159003 /LL=73392 /UG_GENE=1700056N10Rik /UG_TITLE=RIKEN cDNA 1700056N10 gene /DEF=Mus musculus adult male testis cDNA, RIKEN full-length enriched library, clone:1700056N10:unclassifiable, full insert sequence.
1430454_x_at	109	18	0.16	Bcl2l2	Bcl2-like 2			gb:AK013244.1 /DB_XREF=gi:12850487 /GEN=Bcl2l2 /FEA=mRNA /CNT=5 /TID=Mm.6967.2 /TIER=ConsEnd /STK=2 /UG=Mm.6967 /LL=12050 /UG_TITLE=Bcl2-like 2 /DEF=Mus musculus 10, 11 days embryo whole body cDNA, RIKEN full-length enriched library, clone:2810435A13:Bcl2-like 2, full insert sequence.
1424620_at	992	171	0.17	D13Wsu177e	DNA segment, Chr 13, Wayne State University 177, expressed			gb:BC012213.1 /DB_XREF=gi:15126560 /FEA=FLmRNA /CNT=73 /TID=Mm.157758.1 /TIER=FL+Stack /STK=22 /UG=Mm.157758 /LL=28126 /UG_GENE=D13Wsu177e /DEF=Mus musculus, clone MGC:18655 IMAGE:3964770, mRNA, complete cds. /PROD=Unknown (protein for MGC:18655) /FL=gb:BC012213.1
1455899_x_at	835	138	0.17	Socs3	Suppressor of cytokine signaling 3	1456212_x_at		gb:BB241535 /DB_XREF=gi:8934281 /DB_XREF=BB241535 /CLONE=A630087F01 /FEA=EST /CNT=28 /TID=Mm.3468.3 /TIER=Stack /STK=28 /UG=Mm.3468 /LL=12702 /UG_GENE=Cish3 /UG_TITLE=cytokine inducible SH2-containing protein 3
1420472_at	821	141	0.17	Mtpn	Myotrophin			gb:NM_008098.1 /DB_XREF=gi:6679960 /GEN=Gcdp /FEA=FLmRNA /CNT=451 /TID=Mm.4143.1 /TIER=FL /STK=4 /UG=Mm.4143 /LL=14489 /DEF=Mus musculus granule cell differentiation protein (Gcdp), mRNA. /PROD=granule cell differentiation protein /FL=gb:NM_008098.1 gb:U20290.1
1435104_at	658	114	0.17	D130004H04Rik	RIKEN cDNA D130004H04 gene			gb:BI900142 /DB_XREF=gi:16188080 /DB_XREF=id13c05.x1 /CLONE=IMAGE:5662857 /FEA=EST /CNT=51 /TID=Mm.32047.1 /TIER=Stack /STK=20 /UG=Mm.32047 /LL=100255 /UG_GENE=AL024349 /UG_TITLE=expressed sequence AL024349
1435351_at	584	102	0.17	2310026E23Rik	RIKEN cDNA 2310026E23 gene			gb:AA189197 /DB_XREF=gi:1776807 /DB_XREF=mu46h10.r1 /CLONE=IMAGE:642499 /FEA=EST /CNT=41 /TID=Mm.45533.1 /TIER=Stack /STK=17 /UG=Mm.45533 /UG_TITLE=ESTs, Weakly similar to collagen (Caenorhabditis elegans) (C.elegans)
1421179_at	469	81	0.17	Ttyh2	Tweety homolog 2 (Drosophila)			gb:NM_053273.1 /DB_XREF=gi:16716610 /GEN=Ttyh2 /FEA=FLmRNA /CNT=18 /TID=Mm.41871.1 /TIER=FL /STK=2 /UG=Mm.41871 /LL=117160 /DEF=Mus musculus tweety homolog 2 (Drosophila) (Ttyh2), mRNA. /PROD=tweety homolog 2 (Drosophila) /FL=gb:NM_053273.1 gb:AF329682.1
1453787_at	449	76	0.17	Txndc13	Thioredoxin domain containing 13			gb:AK015667.1 /DB_XREF=gi:12854084 /FEA=mRNA /CNT=12 /TID=Mm.156901.1 /TIER=ConsEnd /STK=0 /UG=Mm.156901 /LL=75035 /UG_GENE=4930500L08Rik /UG_TITLE=RIKEN cDNA 4930500L08 gene /DEF=Mus musculus adult male testis cDNA, RIKEN full-length enriched library, clone:4930500L08:Thioredoxin containing protein, full insert sequence.
1441968_at	380	63	0.17	Tspan9	Tetraspanin 9			gb:BB101988 /DB_XREF=gi:16261368 /DB_XREF=BB101988 /CLONE=9430079M16 /FEA=EST /CNT=24 /TID=Mm.161936.1 /TIER=ConsEnd /STK=3 /UG=Mm.161936 /UG_TITLE=ESTs, Weakly similar to CD53 MOUSE LEUKOCYTE SURFACE ANTIGEN CD53 (M.musculus)
1429607_at	378	66	0.17	Trak2	Trafficking protein, kinesin binding 2			gb:AK014647.1 /DB_XREF=gi:12852634 /FEA=mRNA /CNT=20 /TID=Mm.138529.1 /TIER=Stack /STK=13 /UG=Mm.138529 /LL=70827 /UG_GENE=4733401O11Rik /UG_TITLE=RIKEN cDNA 4733401O11 gene /DEF=Mus musculus 10 days neonate skin cDNA, RIKEN full-length enriched library, clone:4733401O11:homolog to HYPOTHETICAL PROTEIN KIAA1042, full insert sequence.
1419593_at	284	49	0.17	Greb1	Gene regulated by estrogen in breast cancer protein			gb:NM_015764.1 /DB_XREF=gi:7656872 /GEN=5730583K22Rik /FEA=FLmRNA /CNT=24 /TID=Mm.117022.1 /TIER=FL+Stack /STK=8 /UG=Mm.117022 /LL=50495 /DEF=Mus musculus RIKEN cDNA 5730583K22 gene (5730583K22Rik), mRNA. /PROD=RIKEN cDNA 5730583K22 gene /FL=gb:NM_015764.1 gb:AF180470.1
1457184_at	264	46	0.17	Frmd6	FERM domain containing 6			gb:BB472173 /DB_XREF=gi:16428020 /DB_XREF=BB472173 /CLONE=D230044C05 /FEA=EST /CNT=5 /TID=Mm.209401.1 /TIER=ConsEnd /STK=5 /UG=Mm.209401 /UG_TITLE=ESTs
1451609_at	200	34	0.17	Tspan33	Tetraspanin 33			gb:BC024685.1 /DB_XREF=gi:19354366 /FEA=FLmRNA /CNT=21 /TID=Mm.28655.1 /TIER=FL /STK=5 /UG=Mm.28655 /LL=71762 /UG_GENE=1300010A20Rik /DEF=Mus musculus, Similar to transmembrane 4 superfamily member (tetraspan NET-7), clone MGC:30714 IMAGE:3981492, mRNA, complete cds. /PROD=Similar to transmembrane 4 superfamily member(tetraspan NET-7) /FL=gb:BC024685.1
1438476_a_at	155	27	0.17	Chd4	Chromodomain helicase DNA binding protein 4			gb:BB201828 /DB_XREF=gi:15409730 /DB_XREF=BB201828 /CLONE=A430041P19 /FEA=EST /CNT=13 /TID=Mm.183257.4 /TIER=Stack /STK=10 /UG=Mm.183257 /UG_TITLE=Mus musculus, clone IMAGE:3492938, mRNA, partial cds
1421829_at	144	25	0.17	Ak3l1	Adenylate kinase 3 alpha-like 1			gb:AB020239.1 /DB_XREF=gi:4760605 /GEN=mAK3b /FEA=FLmRNA /CNT=131 /TID=Mm.42040.1 /TIER=FL /STK=1 /UG=Mm.42040 /LL=11639 /DEF=Mus musculus mRNA for adenylate kinase 3, complete cds. /PROD=adenylate kinase 3 /FL=gb:D85036.1 gb:NM_009647.1 gb:AB020239.1
1421793_at	140	24	0.17	Fgf11	Fibroblast growth factor 11			gb:NM_010198.1 /DB_XREF=gi:6753843 /GEN=Fgf11 /FEA=FLmRNA /CNT=2 /TID=Mm.57238.1 /TIER=FL /STK=2 /UG=Mm.57238 /LL=14166 /DEF=Mus musculus fibroblast growth factor 11 (Fgf11), mRNA. /PROD=fibroblast growth factor 11 /FL=gb:NM_010198.1 gb:U66203.1
1430608_at	137	24	0.17	4930535I16Rik	RIKEN cDNA 4930535I16 gene			gb:BB667541 /DB_XREF=gi:16398990 /DB_XREF=BB667541 /CLONE=C730023O09 /FEA=mRNA /CNT=9 /TID=Mm.179319.1 /TIER=ConsEnd /STK=1 /UG=Mm.179319 /LL=75220 /UG_GENE=4930535I16Rik /UG_TITLE=RIKEN cDNA 4930535I16 gene
1436261_at	133	23	0.17	Hnrpa3	Heterogeneous nuclear ribonucleoprotein A3			gb:BB723867 /DB_XREF=gi:16107142 /DB_XREF=BB723867 /CLONE=C920021M20 /FEA=EST /CNT=11 /TID=Mm.213045.2 /TIER=Stack /STK=10 /UG=Mm.213045 /UG_TITLE=Mus musculus, similar to heterogeneous nuclear ribonucleoprotein A3 (H. sapiens), clone MGC:37309 IMAGE:4975085, mRNA, complete cds
1446102_at	127	22	0.17	Rbm6	RNA binding motif protein 6			gb:BG066577 /DB_XREF=gi:12549234 /DB_XREF=H3045F01-3 /CLONE=H3045F01 /FEA=EST /CNT=2 /TID=Mm.154743.1 /TIER=ConsEnd /STK=2 /UG=Mm.154743 /LL=52208 /UG_GENE=D9Ertd292e /UG_TITLE=DNA segment, Chr 9, ERATO Doi 292, expressed
1438336_at	116	20	0.17	Fbxw11	F-box and WD-40 domain protein 11			gb:BB307004 /DB_XREF=gi:16402254 /DB_XREF=BB307004 /CLONE=B230210M17 /FEA=EST /CNT=11 /TID=Mm.214716.1 /TIER=Stack /STK=11 /UG=Mm.214716 /UG_TITLE=ESTs
1418782_at	988	182	0.18	Rxrg	Retinoid X receptor gamma			gb:NM_009107.1 /DB_XREF=gi:6677828 /GEN=Rxrg /FEA=FLmRNA /CNT=34 /TID=Mm.3475.1 /TIER=FL+Stack /STK=18 /UG=Mm.3475 /LL=20183 /DEF=Mus musculus retinoid X receptor gamma (Rxrg), mRNA. /PROD=retinoid X receptor gamma /FL=gb:M84819.1 gb:NM_009107.1
1435452_at	895	157	0.18	Tmem20	Transmembrane protein 20			gb:BM121082 /DB_XREF=gi:17089108 /DB_XREF=L0948B08-3 /CLONE=L0948B08 /FEA=EST /CNT=25 /TID=Mm.123755.1 /TIER=Stack /STK=16 /UG=Mm.123755 /UG_TITLE=ESTs
1439911_at	744	136	0.18	BC089548	Adult male urinary bladder cDNA, RIKEN full-length enriched library, clone:9530055O04 product:unclassifiable, full insert sequence			gb:BB283577 /DB_XREF=gi:8984026 /DB_XREF=BB283577 /CLONE=A930102L05 /FEA=EST /CNT=8 /TID=Mm.45793.1 /TIER=ConsEnd /STK=6 /UG=Mm.45793 /UG_TITLE=ESTs
1428733_at	634	115	0.18	Gngt2	Guanine nucleotide binding protein (G protein), gamma transducing activity polypeptide 2			gb:AK010554.1 /DB_XREF=gi:12846082 /GEN=Gngt2 /FEA=mRNA /CNT=30 /TID=Mm.46299.1 /TIER=Stack /STK=24 /UG=Mm.46299 /LL=14710 /UG_TITLE=guanine nucleotide binding protein (G protein), gamma transducing activity polypeptide 2 /DEF=Mus musculus ES cells cDNA, RIKEN full-length enriched library, clone:2410018N20:guanine nucleotide binding protein (G protein), gamma transducing activity polypeptide 2, f…
1452638_s_at	588	108	0.18	Dnm1l	Dynamin 1-like			gb:BC027538.1 /DB_XREF=gi:20380346 /FEA=mRNA /CNT=13 /TID=Mm.221051.1 /TIER=ConsEnd /STK=0 /UG=Mm.221051 /DEF=Mus musculus, Similar to dynamin 1-like, clone MGC:41233 IMAGE:1395338, mRNA, complete cds. /PROD=Similar to dynamin 1-like
1456715_at	548	101	0.18	Phr1	Pam, highwire, rpm 1			gb:BM238052 /DB_XREF=gi:17873322 /DB_XREF=K0511D04-3 /CLONE=K0511D04 /FEA=EST /CNT=8 /TID=Mm.131157.1 /TIER=Stack /STK=8 /UG=Mm.131157 /UG_TITLE=ESTs
1437139_at	532	97	0.18	Glra1	Glycine receptor, alpha 1 subunit			gb:AV344554 /DB_XREF=gi:15406594 /DB_XREF=AV344554 /CLONE=6430545K04 /FEA=EST /CNT=25 /TID=Mm.93235.1 /TIER=Stack /STK=25 /UG=Mm.93235 /UG_TITLE=ESTs
1425415_a_at	484	87	0.18	Slc1a1	Solute carrier family 1 (neuronal/epithelial high affinity glutamate transporter, system Xag), member 1	1460386_a_at		gb:U75214.1 /DB_XREF=gi:2459558 /FEA=FLmRNA /CNT=4 /TID=Mm.24741.2 /TIER=FL /STK=2 /UG=Mm.24741 /LL=20510 /UG_GENE=Slc1a1 /DEF=Mus musculus N-terminal truncated glutamate transporter mEAAC2 mRNA, complete cds. /PROD=mEAAC2 /FL=gb:U75214.1
1446810_at	443	82	0.18	Prtg	Protogenin homolog (Gallus gallus)			gb:BB254594 /DB_XREF=gi:16398423 /DB_XREF=BB254594 /CLONE=A730062M13 /FEA=EST /CNT=2 /TID=Mm.208331.1 /TIER=ConsEnd /STK=2 /UG=Mm.208331 /UG_TITLE=ESTs
1459385_at	162	30	0.18	Camsap1l1	Calmodulin regulated spectrin-associated protein 1-like 1			gb:BB528893 /DB_XREF=gi:16445503 /DB_XREF=BB528893 /CLONE=D930048P03 /FEA=EST /CNT=2 /TID=Mm.213364.1 /TIER=ConsEnd /STK=2 /UG=Mm.213364 /UG_TITLE=ESTs
1449357_at	153	27	0.18	2310030G06Rik	RIKEN cDNA 2310030G06 gene			gb:NM_025865.1 /DB_XREF=gi:13385349 /GEN=2310030G06Rik /FEA=FLmRNA /CNT=30 /TID=Mm.154546.1 /TIER=FL+Stack /STK=13 /UG=Mm.154546 /LL=66952 /DEF=Mus musculus RIKEN cDNA 2310030G06 gene (2310030G06Rik), mRNA. /PROD=RIKEN cDNA 2310030G06 /FL=gb:NM_025865.1 gb:BC027409.1
1416635_at	955	180	0.19	Smpdl3a	Sphingomyelin phosphodiesterase, acid-like 3A			gb:NM_020561.1 /DB_XREF=gi:10181129 /GEN=Asml3a-pending /FEA=FLmRNA /CNT=127 /TID=Mm.2379.1 /TIER=FL+Stack /STK=77 /UG=Mm.2379 /LL=57319 /DEF=Mus musculus acid sphingomyelinase-like phosphodiesterase 3a (Asml3a-pending), mRNA. /PROD=acid sphingomyelinase-like phosphodiesterase 3a /FL=gb:NM_020561.1
1435708_at	848	160	0.19	Gls	Glutaminase			gb:BB355415 /DB_XREF=gi:16405709 /DB_XREF=BB355415 /CLONE=C030005N15 /FEA=EST /CNT=16 /TID=Mm.150627.1 /TIER=Stack /STK=14 /UG=Mm.150627 /UG_TITLE=ESTs
1421738_at	418	81	0.19	Gabra2	Gamma-aminobutyric acid (GABA-A) receptor, subunit alpha 2			gb:NM_008066.1 /DB_XREF=gi:6679900 /GEN=Gabra2 /FEA=FLmRNA /CNT=2 /TID=Mm.5304.1 /TIER=FL /STK=2 /UG=Mm.5304 /LL=14395 /DEF=Mus musculus gamma-aminobutyric acid (GABA-A) receptor, subunit alpha 2 (Gabra2), mRNA. /PROD=gamma-aminobutyric acid (GABA-A) receptor,subunit alpha 2 /FL=gb:M86567.1 gb:NM_008066.1
1455740_at	354	67	0.19	Hnrpa1	Heterogeneous nuclear ribonucleoprotein A1			gb:BE685966 /DB_XREF=gi:10073601 /DB_XREF=uv72b02.x1 /CLONE=IMAGE:3412683 /FEA=EST /CNT=13 /TID=Mm.27927.6 /TIER=Stack /STK=8 /UG=Mm.27927 /LL=15382 /UG_GENE=Hnrpa1 /UG_TITLE=heterogeneous nuclear ribonucleoprotein A1
1453956_a_at	301	56	0.19	Pftk1	PFTAIRE protein kinase 1			gb:AK016370.1 /DB_XREF=gi:12855071 /GEN=Pftk1 /FEA=mRNA /CNT=2 /TID=Mm.6456.3 /TIER=ConsEnd /STK=1 /UG=Mm.6456 /LL=18647 /UG_TITLE=PFTAIRE protein kinase 1 /DEF=Mus musculus adult male testis cDNA, RIKEN full-length enriched library, clone:4930588P12:PFTAIRE protein kinase 1, full insert sequence.
1452824_at	262	51	0.19	D1Bwg0212e	DNA segment, Chr 1, Brigham & Women's Genetics 0212 expressed			gb:BG918881 /DB_XREF=gi:14299357 /DB_XREF=602819388F1 /CLONE=IMAGE:4948485 /FEA=mRNA /CNT=52 /TID=Mm.24503.1 /TIER=ConsEnd /STK=0 /UG=Mm.24503 /LL=71992 /UG_GENE=2410015L18Rik /UG_TITLE=RIKEN cDNA 2410015L18 gene
1446217_at	257	49	0.19	AK036329	Transcribed locus			gb:BB132020 /DB_XREF=gi:16266435 /DB_XREF=BB132020 /CLONE=9630058G16 /FEA=EST /CNT=2 /TID=Mm.101953.1 /TIER=ConsEnd /STK=2 /UG=Mm.101953 /UG_TITLE=ESTs, Weakly similar to AF182717 1 AMP-activated protein kinase beta-2 regulatory subunit (R.norvegicus)
1450151_at	239	45	0.19	Zfp316	Zinc finger protein 316			gb:NM_017467.1 /DB_XREF=gi:8567347 /GEN=Zfp316 /FEA=FLmRNA /CNT=28 /TID=Mm.6666.1 /TIER=FL /STK=2 /UG=Mm.6666 /LL=54201 /DEF=Mus musculus zinc finger protein 316 (Zfp316), mRNA. /PROD=zinc finger protein 316 /FL=gb:AF031955.1 gb:AF082568.1 gb:NM_017467.1
1443897_at	216	40	0.19	Ddit3	DNA-damage inducible transcript 3			gb:BB200603 /DB_XREF=gi:16271461 /DB_XREF=BB200603 /CLONE=A430025N08 /FEA=EST /CNT=13 /TID=Mm.110220.1 /TIER=ConsEnd /STK=2 /UG=Mm.110220 /UG_TITLE=ESTs
1428879_at	196	38	0.19	Pitpnc1	Phosphatidylinositol transfer protein, cytoplasmic 1			gb:BI082022 /DB_XREF=gi:14500352 /DB_XREF=602879866F1 /CLONE=IMAGE:5011168 /FEA=mRNA /CNT=63 /TID=Mm.38610.2 /TIER=ConsEnd /STK=0 /UG=Mm.38610 /LL=71795 /UG_GENE=1110020B03Rik /UG_TITLE=RIKEN cDNA 1110020B03 gene
1444634_at	159	30	0.19	Nsun3	NOL1/NOP2/Sun domain family 3			gb:BB478558 /DB_XREF=gi:16440453 /DB_XREF=BB478558 /CLONE=D330032I21 /FEA=EST /CNT=5 /TID=Mm.210369.1 /TIER=ConsEnd /STK=2 /UG=Mm.210369 /UG_TITLE=ESTs, Weakly similar to T33803 hypothetical protein W07E6.1 - Caenorhabditis elegans (fragment) (C.elegans)
1421973_at	154	30	0.19	Gfra1	Glial cell line derived neurotrophic factor family receptor alpha 1			gb:AF015172.1 /DB_XREF=gi:2624962 /GEN=GDNFR-beta /FEA=FLmRNA /CNT=35 /TID=Mm.88367.1 /TIER=FL /STK=1 /UG=Mm.88367 /LL=14585 /DEF=Mus musculus GDNF receptor beta (GDNFR-beta) mRNA, complete cds. /PROD=GDNF receptor beta /FL=gb:AF015172.1 gb:AF014117.1 gb:AB000800.1 gb:NM_010279.1
1451849_a_at	142	27	0.19	Lmnb2	Lamin B2			gb:D13455.1 /DB_XREF=gi:220471 /FEA=FLmRNA /CNT=3 /TID=Mm.7362.2 /TIER=FL /STK=1 /UG=Mm.7362 /LL=16907 /UG_GENE=Lmnb2 /DEF=Mouse mRNA for lamin B3, complete cds. /PROD=lamin B3 /FL=gb:D13455.1
1426538_a_at	135	25	0.19	Trp53	Transformation related protein 53			gb:BB828014 /DB_XREF=gi:17006257 /DB_XREF=BB828014 /CLONE=G830050F09 /FEA=FLmRNA /CNT=34 /TID=Mm.222.7 /TIER=Stack /STK=26 /UG=Mm.222 /LL=22059 /UG_GENE=Trp53 /UG_TITLE=transformation related protein 53 /FL=gb:M13874.1
1456649_at	113	21	0.19	Snx15	Sorting Nexin 15			gb:BB538688 /DB_XREF=gi:16446928 /DB_XREF=BB538688 /CLONE=E130013C21 /FEA=EST /CNT=11 /TID=Mm.215890.1 /TIER=Stack /STK=8 /UG=Mm.215890 /UG_TITLE=ESTs
1422945_a_at	664	135	0.2	Kif5c	Kinesin family member 5C			gb:AI844677 /DB_XREF=gi:5488583 /DB_XREF=UI-M-AL1-ahr-f-01-0-UI.s1 /CLONE=UI-M-AL1-ahr-f-01-0-UI /FEA=FLmRNA /CNT=21 /TID=Mm.41576.1 /TIER=Stack /STK=11 /UG=Mm.41576 /LL=16574 /UG_GENE=Kif5c /UG_TITLE=kinesin family member 5C /FL=gb:AF067180.1 gb:NM_008449.1
1448143_at	622	122	0.2	Aldh2	Aldehyde dehydrogenase 2, mitochondrial			gb:NM_009656.1 /DB_XREF=gi:6753035 /GEN=Aldh2 /FEA=FLmRNA /CNT=478 /TID=Mm.2621.1 /TIER=FL+Stack /STK=170 /UG=Mm.2621 /LL=11669 /DEF=Mus musculus aldehyde dehydrogenase 2, mitochondrial (Aldh2), mRNA. /PROD=aldehyde dehydrogenase 2, mitochondrial /FL=gb:BC005476.1 gb:NM_009656.1 gb:U07235.1
1457008_at	531	106	0.2	Chrnb4	Cholinergic receptor, nicotinic, beta polypeptide 4			gb:AW456706 /DB_XREF=gi:7026923 /DB_XREF=UI-M-BH3-aqv-c-09-0-UI.s1 /CLONE=UI-M-BH3-aqv-c-09-0-UI /FEA=EST /CNT=6 /TID=Mm.32694.1 /TIER=ConsEnd /STK=6 /UG=Mm.32694 /UG_TITLE=ESTs
1451795_at	526	105	0.2	Tom1l2	Target of myb1-like 2 (chicken)			gb:BM226574 /DB_XREF=gi:17788544 /DB_XREF=K0230A11-3 /CLONE=K0230A11 /FEA=FLmRNA /CNT=19 /TID=Mm.218875.1 /TIER=ConsEnd /STK=1 /UG=Mm.218875 /UG_TITLE=Mus musculus target of myb1-like protein 2 (Tom1l2) mRNA, complete cds /FL=gb:AF467887.1
1435135_at	465	92	0.2	Aadacl1	Arylacetamide deacetylase-like 1			gb:BB514928 /DB_XREF=gi:16442968 /DB_XREF=BB514928 /CLONE=D830006A14 /FEA=EST /CNT=245 /TID=Mm.24576.1 /TIER=Stack /STK=64 /UG=Mm.24576 /UG_TITLE=ESTs, Weakly similar to AF182426 1 arylacetamide deacetylase (R.norvegicus)
1459721_at	414	82	0.2	BF662619	Transcribed locus			gb:BF662619 /DB_XREF=gi:11927753 /DB_XREF=maa80h06.x1 /CLONE=IMAGE:3823331 /FEA=EST /CNT=2 /TID=Mm.32079.1 /TIER=ConsEnd /STK=2 /UG=Mm.32079 /UG_TITLE=ESTs
1417396_at	388	78	0.2	Podxl	Podocalyxin-like			gb:NM_013723.1 /DB_XREF=gi:7305396 /GEN=Podxl /FEA=FLmRNA /CNT=112 /TID=Mm.89918.1 /TIER=FL /STK=2 /UG=Mm.89918 /LL=27205 /DEF=Mus musculus podocalyxin-like (Podxl), mRNA. /PROD=podocalyxin-like /FL=gb:AB028048.1 gb:AF290209.1 gb:NM_013723.1
1438133_a_at	337	68	0.2	Cyr61	Cysteine rich protein 61			gb:BM202770 /DB_XREF=gi:17757100 /DB_XREF=C0244E04-3 /CLONE=C0244E04 /FEA=EST /CNT=12 /TID=Mm.1231.2 /TIER=Stack /STK=12 /UG=Mm.1231 /LL=16007 /UG_GENE=Cyr61 /UG_TITLE=cysteine rich protein 61
1427507_at	218	44	0.2	Trim17	Tripartite motif protein 17			gb:AI385992 /DB_XREF=gi:4199455 /DB_XREF=ml53d09.y1 /CLONE=IMAGE:515729 /FEA=mRNA /CNT=8 /TID=Mm.179733.1 /TIER=ConsEnd /STK=0 /UG=Mm.179733 /LL=56631 /UG_GENE=Trim17 /UG_TITLE=tripartite motif protein 17
1459014_at	169	33	0.2	2900019G14Rik	RIKEN cDNA 2900019G14 gene			gb:BE956864 /DB_XREF=gi:10601835 /DB_XREF=UI-M-BG2-bbp-b-09-0-UI.s1 /CLONE=UI-M-BG2-bbp-b-09-0-UI /FEA=EST /CNT=3 /TID=Mm.151017.1 /TIER=ConsEnd /STK=2 /UG=Mm.151017 /UG_TITLE=ESTs
1458068_at	124	25	0.2	4932417H02Rik	RIKEN cDNA 4932417H02 gene			gb:BB374785 /DB_XREF=gi:16407326 /DB_XREF=BB374785 /CLONE=C130077A08 /FEA=EST /CNT=3 /TID=Mm.207516.1 /TIER=ConsEnd /STK=3 /UG=Mm.207516 /UG_TITLE=ESTs
1444671_at	122	24	0.2	Rasal2	RAS protein activator like 2			gb:BB523168 /DB_XREF=gi:16443786 /DB_XREF=BB523168 /CLONE=D930012M13 /FEA=EST /CNT=4 /TID=Mm.123448.1 /TIER=ConsEnd /STK=2 /UG=Mm.123448 /UG_TITLE=ESTs
1445830_at	106	22	0.2	Ctnnd1	Catenin (cadherin associated protein), delta 1			gb:BG073009 /DB_XREF=gi:12555578 /DB_XREF=H3117E12-3 /CLONE=H3117E12 /FEA=EST /CNT=3 /TID=Mm.102848.1 /TIER=ConsEnd /STK=2 /UG=Mm.102848 /UG_TITLE=ESTs, Highly similar to P120 MOUSE P120 PROTEIN (M.musculus)
Crx;Nrl-downregulated genes
Affy_ID	Crx;Nrl_ave	wt_ave	wt_ave/Crx;Nrl_ave	Gene symbol	Gene name	Additional Affy_IDs					Additional gene information
1450946_at	10	30837	3083.7	Nrl	Neural retina leucine zipper gene						gb:BG298773 /DB_XREF=gi:13063762 /DB_XREF=602396508F1 /CLONE=IMAGE:4511449 /FEA=FLmRNA /CNT=58 /TID=Mm.20422.1 /TIER=Stack /STK=13 /UG=Mm.20422 /LL=18185 /UG_GENE=Nrl /UG_TITLE=neural retina leucine zipper gene /FL=gb:NM_008736.1 gb:L14935.1
1451763_at	8	12807	1600.88	Cnga1	Cyclic nucleotide gated channel alpha 1						gb:U19717.1 /DB_XREF=gi:885885 /FEA=FLmRNA /CNT=17 /TID=Mm.23793.1 /TIER=FL /STK=1 /UG=Mm.23793 /LL=12788 /UG_GENE=Cncg /DEF=Mus musculus cGMP-gated cation channel mRNA, clone mIMCD-K2 no.1, complete cds. /PROD=cGMP-gated cation channel /FL=gb:M84742.1 gb:U19717.1
1425171_at	49	33259	678.76	Rho	Rhodopsin	1451618_at	1425172_at	1451617_at			gb:BG296967 /DB_XREF=gi:13060148 /DB_XREF=602394811F1 /CLONE=IMAGE:4506602 /FEA=FLmRNA /CNT=341 /TID=Mm.2965.1 /TIER=Stack /STK=18 /UG=Mm.2965 /UG_TITLE=Mus musculus, Similar to rhodopsin (opsin 2, rod pigment) (retinitis pigmentosa 4, autosomal dominant), clone MGC:21585 IMAGE:4500760, mRNA, complete cds /FL=gb:BC013125.1
1460212_at	59	34397	583	Gnat1	Guanine nucleotide binding protein, alpha transducing 1						gb:BC022793.1 /DB_XREF=gi:18606311 /FEA=FLmRNA /CNT=322 /TID=Mm.69061.1 /TIER=FL+Stack /STK=39 /UG=Mm.69061 /LL=14685 /UG_GENE=Gnat1 /DEF=Mus musculus, guanine nucleotide binding protein, alpha transducing 1, clone MGC:27622 IMAGE:4505478, mRNA, complete cds. /PROD=guanine nucleotide binding protein, alphatransducing 1 /FL=gb:NM_008140.1 gb:BC022793.1
1452243_at	69	8395	121.67	Kcnj14	Potassium inwardly-rectifying channel, subfamily J, member 14						gb:BB282273 /DB_XREF=gi:15411146 /DB_XREF=BB282273 /CLONE=A930036I05 /FEA=mRNA /CNT=62 /TID=Mm.68170.1 /TIER=Stack /STK=37 /UG=Mm.68170 /UG_TITLE=Mus musculus, clone IMAGE:4482148, mRNA, partial cds
1451647_at	95	10583	111.4	Slc24a1	Solute carrier family 24 (sodium/potassium/calcium exchanger), member 1						gb:BC016094.1 /DB_XREF=gi:16359261 /FEA=FLmRNA /CNT=28 /TID=Mm.156243.1 /TIER=FL /STK=3 /UG=Mm.156243 /DEF=Mus musculus, Similar to sodiumcalciumpotassium exchanger, clone MGC:27617 IMAGE:4504496, mRNA, complete cds. /PROD=Similar to sodiumcalciumpotassium exchanger /FL=gb:BC016094.1
1451549_at	85	6439	75.75	BC016201	CDNA sequence BC016201						gb:BC016201.1 /DB_XREF=gi:16740639 /FEA=FLmRNA /CNT=20 /TID=Mm.206230.1 /TIER=FL+Stack /STK=10 /UG=Mm.206230 /DEF=Mus musculus, Similar to cyclic nucleotide-gated channel beta subunit 1, clone MGC:27656 IMAGE:4527347, mRNA, complete cds. /PROD=Similar to cyclic nucleotide-gated channel betasubunit 1 /FL=gb:BC016201.1
1419723_at	84	6101	72.63	Opn1mw	Opsin 1 (cone pigments), medium-wave-sensitive (color blindness, deutan)						gb:NM_008106.1 /DB_XREF=gi:6679974 /GEN=Opn1mw /FEA=FLmRNA /CNT=11 /TID=Mm.89948.1 /TIER=FL /STK=7 /UG=Mm.89948 /LL=14539 /DEF=Mus musculus opsin 1 (cone pigments), medium-wave-sensitive (color blindness, deutan) (Opn1mw), mRNA. /PROD=green cone pigment /FL=gb:AF011389.1 gb:NM_008106.1 gb:BC014826.1 gb:AF190672.1
1431174_at	111	5671	51.09	A930036K24Rik	RIKEN cDNA A930036K24 gene						gb:BG297411 /DB_XREF=gi:13061036 /DB_XREF=602395554F1 /CLONE=IMAGE:4507164 /FEA=mRNA /CNT=11 /TID=Mm.134224.1 /TIER=ConsEnd /STK=0 /UG=Mm.134224 /LL=77829 /UG_GENE=A930036K24Rik /UG_TITLE=RIKEN cDNA A930036K24 gene
1425288_at	172	7165	41.66								gb:BC026991.1 /DB_XREF=gi:20073348 /FEA=FLmRNA /CNT=17 /TID=Mm.69049.2 /TIER=FL /STK=3 /UG=Mm.69049 /LL=57741 /UG_GENE=AF155546 /DEF=Mus musculus, similar to unnamed protein product, clone MGC:38976 IMAGE:5363470, mRNA, complete cds. /PROD=similar to unnamed protein product /FL=gb:BC026991.1
1430128_a_at	433	17337	40.04	Reep6	Receptor accessory protein 6						gb:AK002562.1 /DB_XREF=gi:12832633 /FEA=mRNA /CNT=17 /TID=Mm.28147.2 /TIER=ConsEnd /STK=3 /UG=Mm.28147 /LL=70335 /UG_GENE=0610011M24Rik /UG_TITLE=RIKEN cDNA 0610011M24 gene /DEF=Mus musculus adult male kidney cDNA, RIKEN full-length enriched library, clone:0610011M24:POLYPOSIS LOCUS PROTEIN 1-LIKE 1 (TB2 PROTEIN-LIKE 1), full insert sequence.
1417430_at	149	5633	37.81	Cdr2	Cerebellar degeneration-related 2						gb:NM_007672.1 /DB_XREF=gi:6671729 /GEN=Cdr2 /FEA=FLmRNA /CNT=104 /TID=Mm.1640.1 /TIER=FL+Stack /STK=45 /UG=Mm.1640 /LL=12585 /DEF=Mus musculus cerebellar degeneration-related 2 (Cdr2), mRNA. /PROD=cerebellar degeneration-related 2 /FL=gb:NM_007672.1 gb:U88588.1
1423631_at	296	5099	17.23	Nr2e3	Nuclear receptor subfamily 2, group E, member 3						gb:BB540797 /DB_XREF=gi:15412216 /DB_XREF=BB540797 /CLONE=E130109K18 /FEA=FLmRNA /CNT=44 /TID=Mm.103641.1 /TIER=Stack /STK=8 /UG=Mm.103641 /LL=23958 /UG_GENE=Nr2e3 /UG_TITLE=nuclear receptor subfamily 2, group E, member 3 /FL=gb:NM_013708.1 gb:AF204053.1 gb:AF148129.1 gb:BC017521.1
1425138_at	1268	15766	12.43	Guca1b	Guanylate cyclase activator 1B						gb:BC018480.1 /DB_XREF=gi:17391130 /FEA=FLmRNA /CNT=56 /TID=Mm.59151.1 /TIER=FL /STK=5 /UG=Mm.59151 /DEF=Mus musculus, clone MGC:21424 IMAGE:4500919, mRNA, complete cds. /PROD=Unknown (protein for MGC:21424) /FL=gb:BC018480.1 gb:BC018258.1
1429133_at	586	6698	11.43	4930519N16Rik	RIKEN cDNA 4930519N16 gene	1451861_at					gb:AK015847.1 /DB_XREF=gi:12854341 /FEA=mRNA /CNT=16 /TID=Mm.179243.1 /TIER=Stack /STK=11 /UG=Mm.179243 /LL=75124 /UG_GENE=4930519N16Rik /UG_TITLE=RIKEN cDNA 4930519N16 gene /DEF=Mus musculus adult male testis cDNA, RIKEN full-length enriched library, clone:4930519N16:related to THIOREDOXIN, full insert sequence.
1433699_at	600	6605	11.01	Tnfaip3	Tumor necrosis factor, alpha-induced protein 3	1450829_at					gb:BM241351 /DB_XREF=gi:17876621 /DB_XREF=K0615G01-3 /CLONE=K0615G01 /FEA=EST /CNT=80 /TID=Mm.116683.1 /TIER=Stack /STK=70 /UG=Mm.116683 /UG_TITLE=ESTs
1451603_at	1321	13400	10.14	Rtbdn	Retbindin						gb:BC022744.1 /DB_XREF=gi:18490555 /FEA=FLmRNA /CNT=23 /TID=Mm.206228.1 /TIER=FL /STK=5 /UG=Mm.206228 /DEF=Mus musculus, clone MGC:31644 IMAGE:4527012, mRNA, complete cds. /PROD=Unknown (protein for MGC:31644) /FL=gb:BC027079.1 gb:BC022744.1 gb:BC023051.1
1417432_a_at	2695	24367	9.04	Gnb1	Guanine nucleotide binding protein, beta 1	1454696_at					gb:NM_008142.1 /DB_XREF=gi:6680044 /GEN=Gnb1 /FEA=FLmRNA /CNT=64 /TID=Mm.2344.1 /TIER=FL+Stack /STK=45 /UG=Mm.2344 /LL=14688 /DEF=Mus musculus guanine nucleotide binding protein, beta 1 (Gnb1), mRNA. /PROD=guanine nucleotide-binding protein, beta-1subunit /FL=gb:U29055.1 gb:NM_008142.1
1421084_at	734	6566	8.95	Rs1h	Retinoschisis 1 homolog (human)						gb:AF073780.1 /DB_XREF=gi:5114034 /GEN=Xlrs1 /FEA=FLmRNA /CNT=41 /TID=Mm.41982.1 /TIER=FL /STK=2 /UG=Mm.41982 /LL=20147 /DEF=Mus musculus X-linked juvenile retinoschisis protein (Xlrs1) mRNA, complete cds. /PROD=X-linked juvenile retinoschisis protein /FL=gb:NM_011302.1 gb:AF073780.1 gb:AF084561.1
1424256_at	1453	12205	8.4	Rdh12	Retinol dehydrogenase 12	1431010_a_at					gb:BC016204.1 /DB_XREF=gi:16740648 /FEA=FLmRNA /CNT=56 /TID=Mm.121647.1 /TIER=FL+Stack /STK=42 /UG=Mm.121647 /LL=77974 /UG_GENE=A930033N07Rik /DEF=Mus musculus, Similar to RIKEN cDNA A930033N07 gene, clone MGC:27665 IMAGE:4527851, mRNA, complete cds. /PROD=Similar to RIKEN cDNA A930033N07 gene /FL=gb:BC016204.1
1420484_a_at	2254	15547	6.9	Vtn	Vitronectin	1455098_a_at					gb:NM_011707.1 /DB_XREF=gi:6755986 /GEN=Vtn /FEA=FLmRNA /CNT=90 /TID=Mm.3667.1 /TIER=FL /STK=4 /UG=Mm.3667 /LL=22370 /DEF=Mus musculus vitronectin (Vtn), mRNA. /PROD=vitronectin /FL=gb:AF440693.1 gb:M77123.1 gb:BC012690.1 gb:NM_011707.1
1440838_at	1327	7959	6	AI852064	Expressed sequence AI852064						gb:BQ126997 /DB_XREF=gi:20200908 /DB_XREF=ii57h06.x1 /CLONE=IMAGE:5946082 /FEA=EST /CNT=17 /TID=Mm.40297.1 /TIER=ConsEnd /STK=4 /UG=Mm.40297 /LL=99104 /UG_GENE=AI852064 /UG_TITLE=expressed sequence AI852064
1421144_at	1616	8541	5.29	Rpgrip1	Retinitis pigmentosa GTPase regulator interacting protein 1	1454231_a_at					gb:NM_023879.1 /DB_XREF=gi:13569851 /GEN=Rpgrip1 /FEA=FLmRNA /CNT=35 /TID=Mm.21662.1 /TIER=FL /STK=2 /UG=Mm.21662 /LL=77945 /DEF=Mus musculus retinitis pigmentosa GTPase regulator interacting protein 1 (Rpgrip1), mRNA. /PROD=retinitis pigmentosa GTPase regulatorinteracting protein 1 /FL=gb:AY008297.1 gb:NM_023879.1
1426716_at	1862	9289	4.99	Tdrd7	Tudor domain containing 7						gb:BC025099.1 /DB_XREF=gi:19263616 /FEA=mRNA /CNT=112 /TID=Mm.30935.1 /TIER=Stack /STK=95 /UG=Mm.30935 /DEF=Mus musculus, clone IMAGE:4512174, mRNA, partial cds. /PROD=Unknown (protein for IMAGE:4512174)
1417953_at	1575	7294	4.63	D6Wsu176e	DNA segment, Chr 6, Wayne State University 176, expressed	1448904_at					gb:NM_138587.1 /DB_XREF=gi:20070393 /GEN=D6Wsu176e /FEA=FLmRNA /CNT=112 /TID=Mm.27673.1 /TIER=FL+Stack /STK=32 /UG=Mm.27673 /LL=27999 /DEF=Mus musculus DNA segment, Chr 6, Wayne State University 176, expressed (D6Wsu176e), mRNA. /PROD=DNA segment, Chr 6, Wayne State University 176,expressed /FL=gb:BC009086.1 gb:NM_138587.1
1415860_at	2916	10760	3.69	Kpna2	Karyopherin (importin) alpha 2						gb:NM_010655.1 /DB_XREF=gi:6754473 /GEN=Kpna2 /FEA=FLmRNA /CNT=399 /TID=Mm.12508.1 /TIER=FL+Stack /STK=197 /UG=Mm.12508 /LL=16647 /DEF=Mus musculus karyopherin (importin) alpha 2 (Kpna2), mRNA. /PROD=karyopherin (importin) alpha 2 /FL=gb:U34229.1 gb:NM_010655.1 gb:BC006720.1 gb:D55720.1 gb:U12270.1 gb:BC003274.1
1460368_at	4087	14891	3.64	Mpp4	Membrane protein, palmitoylated 4 (MAGUK p55 subfamily member 4)						gb:AB059357.1 /DB_XREF=gi:15991073 /GEN=mDLG6A /FEA=FLmRNA /CNT=25 /TID=Mm.101838.1 /TIER=FL+Stack /STK=10 /UG=Mm.101838 /DEF=Mus musculus mRNA for mDLG6A, complete cds. /PROD=mDLG6A /FL=gb:AB059358.1 gb:AB059357.1
1434313_at	2689	9291	3.46	6330407D12Rik	RIKEN cDNA 6330407D12 gene						gb:BB762434 /DB_XREF=gi:16207584 /DB_XREF=BB762434 /CLONE=G370010L10 /FEA=EST /CNT=45 /TID=Mm.32416.1 /TIER=Stack /STK=35 /UG=Mm.32416 /LL=58912 /UG_GENE=AI465320 /UG_TITLE=EST AI465320
1424963_at	3532	12057	3.41	Rp1h	Retinitis pigmentosa 1 homolog (human)						gb:AF155141.2 /DB_XREF=gi:18152811 /GEN=Rp1 /FEA=FLmRNA /CNT=36 /TID=Mm.78749.1 /TIER=FL+Stack /STK=10 /UG=Mm.78749 /LL=19888 /DEF=Mus musculus oxygen-regulated photoreceptor protein 1 (Rp1) mRNA, complete cds. /PROD=oxygen-regulated photoreceptor protein 1 /FL=gb:AF155141.2
1454608_x_at	3131	10584	3.38	Ttr	Transthyretin	1459737_s_at					gb:BG141874 /DB_XREF=gi:12645269 /DB_XREF=ia95f03.x1 /CLONE=IMAGE:5646100 /FEA=EST /CNT=189 /TID=Mm.2108.3 /TIER=Stack /STK=163 /UG=Mm.2108 /LL=22139 /UG_GENE=Ttr /UG_TITLE=transthyretin
1425100_a_at	9233	30800	3.34			1450453_a_at					gb:BC014723.1 /DB_XREF=gi:15928490 /FEA=FLmRNA /CNT=10 /TID=Mm.39200.2 /TIER=FL /STK=7 /UG=Mm.39200 /LL=18588 /UG_GENE=Pde6g /DEF=Mus musculus, Similar to phosphodiesterase 6G, cGMP-specific, rod, gamma, clone MGC:25416 IMAGE:4511855, mRNA, complete cds. /PROD=Similar to phosphodiesterase 6G, cGMP-specific,rod, gamma /FL=gb:BC014723.1
1428355_at	1676	5572	3.32	Osbp2	Oxysterol binding protein 2	1428356_at					gb:AV274454 /DB_XREF=gi:16390528 /DB_XREF=AV274454 /CLONE=4932418N07 /FEA=mRNA /CNT=96 /TID=Mm.61022.1 /TIER=Stack /STK=49 /UG=Mm.61022 /LL=74309 /UG_GENE=Osbp2 /UG_TITLE=oxysterol binding protein 2
1450215_at	7542	23464	3.11	Rcvrn	Recoverin						gb:NM_009038.1 /DB_XREF=gi:6677692 /GEN=Rcvrn /FEA=FLmRNA /CNT=9 /TID=Mm.157931.1 /TIER=FL /STK=2 /UG=Mm.157931 /LL=19674 /DEF=Mus musculus recoverin (Rcvrn), mRNA. /PROD=recoverin /FL=gb:NM_009038.1
1419067_a_at	1613	5016	3.11	Rabgef1	RAB guanine nucleotide exchange factor (GEF) 1	1419069_at	1419068_at				gb:NM_019983.1 /DB_XREF=gi:9910315 /GEN=Rab5ef-pending /FEA=FLmRNA /CNT=53 /TID=Mm.101118.1 /TIER=FL+Stack /STK=14 /UG=Mm.101118 /LL=56715 /DEF=Mus musculus Rab5 exchange factor (Rab5ef-pending), mRNA. /PROD=Rab5 exchange factor /FL=gb:AF093590.1 gb:BC018229.1 gb:NM_019983.1
1435800_a_at	4748	14620	3.08	Csda	Cold shock domain protein A	1451012_a_at					gb:BB779100 /DB_XREF=gi:16939800 /DB_XREF=BB779100 /CLONE=G430050O16 /FEA=EST /CNT=17 /TID=Mm.193526.3 /TIER=Stack /STK=13 /UG=Mm.193526 /LL=56449 /UG_GENE=Csda /UG_TITLE=cold shock domain protein A
1436657_at	3004	9082	3.02		PREDICTED: Mus musculus hypothetical protein LOC629972 (LOC629972), mRNA						gb:AW060253 /DB_XREF=gi:6008044 /DB_XREF=UI-M-BH1-amv-f-03-0-UI.s1 /CLONE=UI-M-BH1-amv-f-03-0-UI /FEA=EST /CNT=9 /TID=Mm.39855.1 /TIER=Stack /STK=8 /UG=Mm.39855 /UG_TITLE=ESTs
1440256_at	3023	9048	2.99	Rgs9bp	Regulator of G-protein signalling 9 binding protein						gb:BE981862 /DB_XREF=gi:10651419 /DB_XREF=UI-M-CG0p-bde-b-04-0-UI.s1 /CLONE=UI-M-CG0p-bde-b-04-0-UI /FEA=EST /CNT=13 /TID=Mm.151251.1 /TIER=ConsEnd /STK=5 /UG=Mm.151251 /UG_TITLE=ESTs, Weakly similar to C37C3.1.p (Caenorhabditis elegans) (C.elegans)
1419740_at	8796	25789	2.93	Pde6b	Phosphodiesterase 6B, cGMP, rod receptor, beta polypeptide						gb:NM_008806.1 /DB_XREF=gi:6679254 /GEN=Pde6b /FEA=FLmRNA /CNT=85 /TID=Mm.1372.1 /TIER=FL /STK=6 /UG=Mm.1372 /LL=18587 /DEF=Mus musculus phosphodiesterase 6B, cGMP, rod receptor, beta polypeptide (Pde6b), mRNA. /PROD=phosphodiesterase 6B, cGMP, rod receptor, betapolypeptide /FL=gb:NM_008806.1
1417810_a_at	2709	7579	2.8	Pacsin2	Protein kinase C and casein kinase substrate in neurons 2	1423179_at	1423180_at				gb:NM_011862.1 /DB_XREF=gi:7106380 /GEN=Pacsin2 /FEA=FLmRNA /CNT=67 /TID=Mm.23978.1 /TIER=FL+Stack /STK=36 /UG=Mm.23978 /LL=23970 /DEF=Mus musculus protein kinase C and casein kinase substrate in neurons 2 (Pacsin2), mRNA. /PROD=protein kinase C and casein kinase substrate inneurons 2 /FL=gb:AF128535.1 gb:NM_011862.1
1447905_x_at	2805	7538	2.69	Nup62	Nucleoporin 62						gb:BB331755 /DB_XREF=gi:9040518 /DB_XREF=BB331755 /CLONE=B730038J24 /FEA=EST /CNT=2 /TID=Mm.149632.1 /TIER=ConsEnd /STK=2 /UG=Mm.149632 /UG_TITLE=ESTs
1416101_a_at	3171	8454	2.67	Hist1h1c	Histone 1, H1c						gb:NM_015786.1 /DB_XREF=gi:9845256 /GEN=H1f2 /FEA=FLmRNA /CNT=188 /TID=Mm.193539.1 /TIER=FL+Stack /STK=127 /UG=Mm.193539 /LL=50708 /DEF=Mus musculus H1 histone family, member 2 (H1f2), mRNA. /PROD=H1 histone family, member 2 /FL=gb:NM_015786.1
1417886_at	4767	12593	2.64	1810009A15Rik	RIKEN cDNA 1810009A15 gene						gb:NM_025463.1 /DB_XREF=gi:13384875 /GEN=1810009A15Rik /FEA=FLmRNA /CNT=58 /TID=Mm.28103.1 /TIER=FL+Stack /STK=34 /UG=Mm.28103 /LL=66276 /DEF=Mus musculus RIKEN cDNA 1810009A15 gene (1810009A15Rik), mRNA. /PROD=RIKEN cDNA 1810009A15 /FL=gb:NM_025463.1
1439802_at	2398	5901	2.46	Stk35	Serine/threonine kinase 35						gb:AV375248 /DB_XREF=gi:16397982 /DB_XREF=AV375248 /CLONE=9130022M19 /FEA=EST /CNT=19 /TID=Mm.44868.1 /TIER=ConsEnd /STK=6 /UG=Mm.44868 /UG_TITLE=ESTs
1423488_at	2108	5065	2.4	Mmd	Monocyte to macrophage differentiation-associated	1423489_at	1435645_at				gb:AK011418.1 /DB_XREF=gi:12847528 /FEA=FLmRNA /CNT=142 /TID=Mm.38791.1 /TIER=Stack /STK=15 /UG=Mm.38791 /LL=67468 /UG_GENE=Mmd /UG_TITLE=monocyte to macrophage differentiation-associated /DEF=Mus musculus 10 days embryo whole body cDNA, RIKEN full-length enriched library, clone:2610016F14:homolog to MONOCYTE TO MACROPHAGE DIFFERENTIATION PROTEIN, full insert sequence. /FL=gb:NM_026178.1 gb:BC021…
1433490_s_at	4851	11574	2.39	Epb4.1l2	Erythrocyte protein band 4.1-like 2	1433491_at	1459619_at				gb:BG075070 /DB_XREF=gi:12557639 /DB_XREF=H3142H09-3 /CLONE=H3142H09 /FEA=EST /CNT=264 /TID=Mm.814.1 /TIER=Stack /STK=129 /UG=Mm.814 /LL=52582 /UG_GENE=D10Ertd398e /UG_TITLE=DNA segment, Chr 10, ERATO Doi 398, expressed
1426500_at	2948	6994	2.37	Icmt	Isoprenylcysteine carboxyl methyltransferase						gb:BF462080 /DB_XREF=gi:11531263 /DB_XREF=UI-M-CG0p-bmx-c-12-0-UI.s1 /CLONE=UI-M-CG0p-bmx-c-12-0-UI /FEA=FLmRNA /CNT=162 /TID=Mm.29356.1 /TIER=Stack /STK=8 /UG=Mm.29356 /LL=97166 /UG_GENE=C80758 /UG_TITLE=expressed sequence C80758 /FL=gb:BC006724.1
1425167_a_at	5539	12976	2.34			1425168_at	1451633_a_at				gb:BC023064.1 /DB_XREF=gi:18606499 /FEA=FLmRNA /CNT=7 /TID=Mm.95398.1 /TIER=FL /STK=5 /UG=Mm.95398 /LL=14699 /UG_GENE=Gng1 /DEF=Mus musculus, Similar to guanine nucleotide binding protein (G protein), gamma 1 subunit, clone MGC:38870 IMAGE:5361463, mRNA, complete cds. /PROD=Similar to guanine nucleotide binding protein (Gprotein), gamma 1 subunit /FL=gb:BC023064.1
1439148_a_at	3517	8171	2.32	Pfkl	Phosphofructokinase, liver, B-type	1450269_a_at					gb:BE914497 /DB_XREF=gi:10413185 /DB_XREF=601668889F1 /CLONE=IMAGE:3968567 /FEA=EST /CNT=11 /TID=Mm.1166.4 /TIER=Stack /STK=8 /UG=Mm.1166 /LL=18641 /UG_GENE=Pfkl /UG_TITLE=phosphofructokinase, liver, B-type
1435392_at	2408	5424	2.25	Wdr17	WD repeat domain 17						gb:BB277182 /DB_XREF=gi:15410925 /DB_XREF=BB277182 /CLONE=A930002M15 /FEA=EST /CNT=19 /TID=Mm.95281.1 /TIER=Stack /STK=17 /UG=Mm.95281 /UG_TITLE=ESTs
1448996_at	8492	18733	2.21	Rom1	Rod outer segment membrane protein 1						gb:NM_009073.1 /DB_XREF=gi:6677762 /GEN=Rom1 /FEA=FLmRNA /CNT=78 /TID=Mm.679.1 /TIER=FL+Stack /STK=28 /UG=Mm.679 /LL=19881 /DEF=Mus musculus rod outer segment membrane protein 1 (Rom1), mRNA. /PROD=rod outer segment membrane protein 1 /FL=gb:BC014827.1 gb:NM_009073.1
1417298_at	4042	8948	2.21	Ebpl	Emopamil binding protein-like	1458177_at					gb:BC027422.1 /DB_XREF=gi:20073245 /FEA=FLmRNA /CNT=72 /TID=Mm.22758.1 /TIER=FL+Stack /STK=49 /UG=Mm.22758 /LL=68177 /UG_GENE=5730442K12Rik /DEF=Mus musculus, RIKEN cDNA 5730442K12 gene, clone MGC:35635 IMAGE:4035224, mRNA, complete cds. /PROD=RIKEN cDNA 5730442K12 gene /FL=gb:BC027422.1 gb:AF243434.2 gb:NM_026598.1
1433585_at	2483	5487	2.21	Tnpo1	Transportin 1						gb:BI696984 /DB_XREF=gi:15659613 /DB_XREF=603348436F1 /CLONE=IMAGE:5376033 /FEA=EST /CNT=153 /TID=Mm.29005.1 /TIER=Stack /STK=86 /UG=Mm.29005 /LL=105287 /UG_GENE=AU021749 /UG_TITLE=expressed sequence AU021749
1420760_s_at	2801	6174	2.2	Ndrg1	N-myc downstream regulated gene 1						gb:NM_008681.1 /DB_XREF=gi:6679029 /GEN=Ndrl /FEA=FLmRNA /CNT=5 /TID=Mm.30837.1 /TIER=FL /STK=3 /UG=Mm.30837 /LL=17990 /DEF=Mus musculus N-myc downstream regulated-like (Ndrl), mRNA. /PROD=N-myc downstream regulated-like /FL=gb:NM_008681.1 gb:U52073.1
1428637_at	2453	5373	2.19	Dyrk2	Dual-specificity tyrosine-(Y)-phosphorylation regulated kinase 2	1456502_at					gb:AK007736.1 /DB_XREF=gi:12841473 /FEA=mRNA /CNT=50 /TID=Mm.45565.1 /TIER=Stack /STK=28 /UG=Mm.45565 /LL=69181 /UG_GENE=1810038L18Rik /UG_TITLE=RIKEN cDNA 1810038L18 gene /DEF=Mus musculus 10 day old male pancreas cDNA, RIKEN full-length enriched library, clone:1810038L18:unclassifiable transcript, full insert sequence.
1415758_at	2431	5252	2.16	Fryl	Furry homolog-like (Drosophila)	1427199_at					gb:BM118442 /DB_XREF=gi:17086468 /DB_XREF=L0911A11-3 /CLONE=L0911A11 /FEA=mRNA /CNT=116 /TID=Mm.1921.1 /TIER=Stack /STK=9 /UG=Mm.1921 /LL=72313 /UG_GENE=2510002A14Rik /UG_TITLE=RIKEN cDNA 2510002A14 gene
1423239_at	2818	5934	2.11	Impdh1	Inosine 5'-phosphate dehydrogenase 1						gb:BB351792 /DB_XREF=gi:16405408 /DB_XREF=BB351792 /CLONE=B930086D20 /FEA=FLmRNA /CNT=58 /TID=Mm.45234.1 /TIER=Stack /STK=24 /UG=Mm.45234 /LL=23917 /UG_GENE=Impdh1 /UG_TITLE=inosine 5-phosphate dehydrogenase 1 /FL=gb:U00978.1 gb:NM_011829.1
1435436_at	2704	5716	2.11	Epas1	Endothelial PAS domain protein 1						gb:BI647951 /DB_XREF=gi:15562187 /DB_XREF=603276037F1 /CLONE=IMAGE:5316560 /FEA=EST /CNT=46 /TID=Mm.87705.1 /TIER=Stack /STK=16 /UG=Mm.87705 /UG_TITLE=ESTs
1418705_at	6888	14103	2.05	Crx	Cone-rod homeobox containing gene						gb:BC016502.1 /DB_XREF=gi:16741346 /FEA=FLmRNA /CNT=69 /TID=Mm.8008.1 /TIER=FL+Stack /STK=19 /UG=Mm.8008 /LL=12951 /UG_GENE=Crx /DEF=Mus musculus, cone-rod homeobox containing gene, clone MGC:25283 IMAGE:4527863, mRNA, complete cds. /PROD=cone-rod homeobox containing gene /FL=gb:U77615.1 gb:NM_007770.1 gb:BC016502.1
1458418_at	11	3576	325.09								gb:BB282649 /DB_XREF=gi:16401375 /DB_XREF=BB282649 /CLONE=A930039E13 /FEA=EST /CNT=6 /TID=Mm.208796.1 /TIER=ConsEnd /STK=2 /UG=Mm.208796 /UG_TITLE=ESTs
1428975_at	31	2913	93.97	Susd3	Sushi domain containing 3						gb:AK003860.1 /DB_XREF=gi:12834784 /FEA=mRNA /CNT=36 /TID=Mm.34308.1 /TIER=Stack /STK=15 /UG=Mm.34308 /LL=66329 /UG_GENE=1700017I11Rik /UG_TITLE=RIKEN cDNA 1700017I11 gene /DEF=Mus musculus 18 days embryo whole body cDNA, RIKEN full-length enriched library, clone:1110020G21:Sushi domain (SCR repeat) containing protein, full insert sequence.
1416203_at	47	2318	49.32	Aqp1	Aquaporin 1						gb:NM_007472.1 /DB_XREF=gi:6680709 /GEN=Aqp1 /FEA=FLmRNA /CNT=262 /TID=Mm.18625.1 /TIER=FL+Stack /STK=113 /UG=Mm.18625 /LL=11826 /DEF=Mus musculus aquaporin 1 (Aqp1), mRNA. /PROD=aquaporin 1 /FL=gb:NM_007472.1 gb:BC007125.1 gb:L02914.1
1450415_at	97	4161	42.9								gb:NM_008805.1 /DB_XREF=gi:6679252 /GEN=Pde6a /FEA=FLmRNA /CNT=32 /TID=Mm.1370.1 /TIER=FL /STK=1 /UG=Mm.1370 /LL=18586 /DEF=Mus musculus phosphodiesterase 6A, cGMP-specific, rod, alpha (Pde6a), mRNA. /PROD=phosphodiesterase 6A, cGMP-specific, rod, alpha /FL=gb:NM_008805.1
1430817_at	32	1153	36.03	Samd7	Sterile alpha motif domain containing 7	1455782_at					gb:AK016401.1 /DB_XREF=gi:12855110 /FEA=mRNA /CNT=4 /TID=Mm.159633.1 /TIER=ConsEnd /STK=1 /UG=Mm.159633 /LL=75953 /UG_GENE=4930597A01Rik /UG_TITLE=RIKEN cDNA 4930597A01 gene /DEF=Mus musculus adult male testis cDNA, RIKEN full-length enriched library, clone:4930597A01:unclassifiable, full insert sequence.
1448593_at	50	1612	32.24	Wisp1	WNT1 inducible signaling pathway protein 1	1448594_at					gb:AF100777.1 /DB_XREF=gi:4028576 /GEN=Wisp1 /FEA=FLmRNA /CNT=99 /TID=Mm.10222.1 /TIER=FL+Stack /STK=56 /UG=Mm.10222 /LL=22402 /DEF=Mus musculus connective tissue growth factor related protein WISP-1 (Wisp1) mRNA, complete cds. /PROD=connective tissue growth factor related proteinWISP-1 /FL=gb:AF100777.1 gb:NM_018865.1 gb:AB004873.1
1425408_a_at	132	3961	30.01	2610034M16Rik	RIKEN cDNA 2610034M16 gene						gb:BC024774.1 /DB_XREF=gi:19353722 /FEA=FLmRNA /CNT=4 /TID=Mm.179408.1 /TIER=FL /STK=2 /UG=Mm.179408 /LL=69239 /UG_GENE=2610034M16Rik /DEF=Mus musculus, Similar to RIKEN cDNA 2610034M16 gene, clone MGC:38949 IMAGE:5363112, mRNA, complete cds. /PROD=Similar to RIKEN cDNA 2610034M16 gene /FL=gb:BC024774.1
1425696_at	89	2649	29.76	Txnl6	Thioredoxin-like 6						gb:BC021911.1 /DB_XREF=gi:18314459 /FEA=FLmRNA /CNT=11 /TID=Mm.213208.1 /TIER=FL /STK=1 /UG=Mm.213208 /DEF=Mus musculus, clone MGC:27601 IMAGE:4502967, mRNA, complete cds. /PROD=Unknown (protein for MGC:27601) /FL=gb:BC021911.1
1436277_at	99	2922	29.52	D330010C22Rik	RIKEN cDNA 330010C22 gene						gb:BI734893 /DB_XREF=gi:15711906 /DB_XREF=603356092F1 /CLONE=IMAGE:5363375 /FEA=EST /CNT=10 /TID=Mm.29356.2 /TIER=Stack /STK=10 /UG=Mm.29356 /LL=97166 /UG_GENE=C80758 /UG_TITLE=expressed sequence C80758
1458506_at	161	4078	25.33	Gm1582	Gene model 1582, (NCBI)						gb:BI735399 /DB_XREF=gi:15712412 /DB_XREF=603356886F1 /CLONE=IMAGE:5364237 /FEA=EST /CNT=6 /TID=Mm.206197.1 /TIER=ConsEnd /STK=2 /UG=Mm.206197 /UG_TITLE=ESTs
1446754_a_at	60	1301	21.68	Vax2os1	Vax2 opposite strand transcript 1	1443232_at					gb:BM936191 /DB_XREF=gi:19395343 /DB_XREF=UI-M-CG0p-bqa-g-09-0-UI.r1 /CLONE=UI-M-CG0p-bqa-g-09-0-UI /FEA=EST /CNT=2 /TID=Mm.185937.2 /TIER=ConsEnd /STK=2 /UG=Mm.185937 /UG_TITLE=ESTs
1433727_at	116	2381	20.53	BC038479	CDNA sequence BC038479	1433728_at					gb:AV025920 /DB_XREF=gi:16356455 /DB_XREF=AV025920 /CLONE=1200016J01 /FEA=EST /CNT=106 /TID=Mm.27909.1 /TIER=Stack /STK=66 /UG=Mm.27909 /UG_TITLE=ESTs, Weakly similar to BETA-GALACTOSIDASE PRECURSOR (M.musculus)
1422829_at	142	2138	15.06	Drd4	Dopamine receptor 4	1422830_s_at					gb:NM_007878.1 /DB_XREF=gi:6681222 /GEN=Drd4 /FEA=FLmRNA /CNT=26 /TID=Mm.41075.1 /TIER=FL+Stack /STK=10 /UG=Mm.41075 /LL=13491 /DEF=Mus musculus dopamine receptor 4 (Drd4), mRNA. /PROD=dopamine receptor 4 /FL=gb:NM_007878.1 gb:BC016086.1
1423611_at	153	2268	14.82	Akp2	Alkaline phosphatase 2, liver						gb:AW319615 /DB_XREF=gi:6749159 /DB_XREF=um99d08.x1 /CLONE=IMAGE:2352879 /FEA=FLmRNA /CNT=175 /TID=Mm.1265.1 /TIER=Stack /STK=8 /UG=Mm.1265 /LL=11647 /UG_GENE=Akp2 /UG_TITLE=alkaline phosphatase 2, liver /FL=gb:J02980.1 gb:NM_007431.1
1440605_at	85	1217	14.32	Fscn2	Fascin homolog 2, actin-bundling protein, retinal (Strongylocentrotus purpuratus)						gb:BB279997 /DB_XREF=gi:16401211 /DB_XREF=BB279997 /CLONE=A930022G03 /FEA=EST /CNT=5 /TID=Mm.134230.1 /TIER=ConsEnd /STK=5 /UG=Mm.134230 /UG_TITLE=ESTs, Weakly similar to FASCIN (M.musculus)
1425878_at	224	2911	13	Cabp4	Calcium binding protein 4	1456936_at					gb:AY039218.1 /DB_XREF=gi:18031756 /FEA=FLmRNA /CNT=4 /TID=Mm.216448.1 /TIER=FL /STK=1 /UG=Mm.216448 /DEF=Mus musculus calcium-binding protein CaBP4 mRNA, complete cds. /PROD=calcium-binding protein CaBP4 /FL=gb:AY039218.1
1442242_at	102	1127	11.05	C79127	Expressed sequence C79127						gb:BB277133 /DB_XREF=gi:15410921 /DB_XREF=BB277133 /CLONE=A930002H20 /FEA=EST /CNT=5 /TID=Mm.134068.1 /TIER=ConsEnd /STK=3 /UG=Mm.134068 /LL=97371 /UG_GENE=C79127 /UG_TITLE=expressed sequence C79127
1424895_at	423	4594	10.86	Gpsm2	G-protein signalling modulator 2 (AGS3-like, C. elegans)						gb:BC021308.1 /DB_XREF=gi:18204661 /FEA=FLmRNA /CNT=32 /TID=Mm.220948.1 /TIER=FL+Stack /STK=12 /UG=Mm.220948 /LL=76123 /UG_GENE=6230410J09Rik /DEF=Mus musculus, Similar to LGN protein, clone MGC:29185 IMAGE:5007832, mRNA, complete cds. /PROD=Similar to LGN protein /FL=gb:BC021308.1
1456905_at	184	1979	10.76	Slc6a9	Solute carrier family 6 (neurotransmitter transporter, glycine), member 9						gb:BB018903 /DB_XREF=gi:16257595 /DB_XREF=BB018903 /CLONE=4930580H03 /FEA=EST /CNT=12 /TID=Mm.23104.1 /TIER=ConsEnd /STK=6 /UG=Mm.23104 /UG_TITLE=ESTs
1424650_at	209	2171	10.39	Pdia5	Protein disulfide isomerase associated 5						gb:BC009151.1 /DB_XREF=gi:14318712 /FEA=FLmRNA /CNT=57 /TID=Mm.71015.1 /TIER=FL+Stack /STK=21 /UG=Mm.71015 /LL=72599 /UG_GENE=2700053F16Rik /DEF=Mus musculus, Similar to for protein disulfide isomerase-related, clone MGC:11961 IMAGE:3600849, mRNA, complete cds. /PROD=Similar to for protein disulfideisomerase-related /FL=gb:BC009151.1
1417288_at	150	1421	9.47	Plekha2	Pleckstrin homology domain-containing, family A (phosphoinositide binding specific) member 2	1417289_at	1436177_at				gb:BC010215.1 /DB_XREF=gi:16307353 /FEA=FLmRNA /CNT=134 /TID=Mm.148782.1 /TIER=FL+Stack /STK=49 /UG=Mm.148782 /LL=83436 /UG_GENE=Plekha2 /DEF=Mus musculus, pleckstrin homology domain-containing, family A (phosphoinositide binding specific) member 2andem PH Domain containing protein 2, clone MGC:7728 IMAGE:3498236, mRNA, complete cds. /PROD=pleckstrin homology domain-containing, family A(phosphoin…
1424608_a_at	217	2018	9.3								gb:BB204720 /DB_XREF=gi:16351882 /DB_XREF=BB204720 /CLONE=A430059G22 /FEA=FLmRNA /CNT=74 /TID=Mm.182434.2 /TIER=Stack /STK=16 /UG=Mm.182434 /UG_TITLE=Mus musculus, Similar to RIKEN cDNA 1700066C05 gene, clone MGC:28125 IMAGE:3980327, mRNA, complete cds /FL=gb:BC020078.1
1441330_at	533	4888	9.17	Crb1	Crumbs homolog 1 (Drosophila)						gb:BG295465 /DB_XREF=gi:13057127 /DB_XREF=602392781F1 /CLONE=IMAGE:4504244 /FEA=EST /CNT=6 /TID=Mm.101073.1 /TIER=ConsEnd /STK=4 /UG=Mm.101073 /UG_TITLE=ESTs
1460479_at	128	1153	9.01	A330094K24Rik	RIKEN cDNA A330094K24 gene						gb:AK020726.1 /DB_XREF=gi:12861400 /FEA=mRNA /CNT=4 /TID=Mm.177999.1 /TIER=ConsEnd /STK=3 /UG=Mm.177999 /LL=77093 /UG_GENE=A330094K24Rik /UG_TITLE=RIKEN cDNA A330094K24 gene /DEF=Mus musculus adult male spinal cord cDNA, RIKEN full-length enriched library, clone:A330094K24:unclassifiable transcript, full insert sequence.
1448390_a_at	133	1175	8.83	Dhrs3	Dehydrogenase/reductase (SDR family) member 3						gb:NM_011303.1 /DB_XREF=gi:6755379 /GEN=Rsdr1-pending /FEA=FLmRNA /CNT=130 /TID=Mm.14063.1 /TIER=FL+Stack /STK=80 /UG=Mm.14063 /LL=20148 /DEF=Mus musculus retinal short-chain dehydrogenasereductase 1 (Rsdr1-pending), mRNA. /PROD=retinal short-chain dehydrogenasereductase 1 /FL=gb:NM_011303.1 gb:BC010972.1 gb:AF061743.1 gb:BC013540.1
1457010_at	120	1002	8.35	3010001F23Rik	RIKEN cDNA 3010001F23 gene						gb:AW049649 /DB_XREF=gi:5910178 /DB_XREF=UI-M-BH1-and-g-09-0-UI.s1 /CLONE=UI-M-BH1-and-g-09-0-UI /FEA=EST /CNT=6 /TID=Mm.44979.1 /TIER=ConsEnd /STK=6 /UG=Mm.44979 /UG_TITLE=ESTs
1425757_a_at	233	1796	7.71	Impg1	Interphotoreceptor matrix proteoglycan 1	1425758_a_at					gb:BC022970.1 /DB_XREF=gi:18606432 /FEA=FLmRNA /CNT=6 /TID=Mm.155709.2 /TIER=FL /STK=1 /UG=Mm.155709 /LL=63859 /UG_GENE=Impg1 /DEF=Mus musculus, interphotoreceptor matrix proteoglycan 1, clone MGC:35847 IMAGE:5366008, mRNA, complete cds. /PROD=interphotoreceptor matrix proteoglycan 1 /FL=gb:AF266478.1 gb:BC022970.1
1435189_at	290	2229	7.69	Frmpd1	FERM and PDZ domain containing 1						gb:BM213356 /DB_XREF=gi:17771213 /DB_XREF=C0835C02-3 /CLONE=C0835C02 /FEA=EST /CNT=25 /TID=Mm.24783.1 /TIER=Stack /STK=19 /UG=Mm.24783 /UG_TITLE=ESTs, Highly similar to KIAA0967 protein (H.sapiens)
1451210_at	502	3789	7.55	Ppap2c	Phosphatidic acid phosphatase type 2c						gb:BC010332.1 /DB_XREF=gi:16307570 /FEA=FLmRNA /CNT=117 /TID=Mm.28873.2 /TIER=FL+Stack /STK=62 /UG=Mm.28873 /LL=50784 /UG_GENE=Ppap2c /DEF=Mus musculus, phosphatidic acid phosphatase type 2c, clone MGC:6301 IMAGE:2654393, mRNA, complete cds. /PROD=phosphatidic acid phosphatase type 2c /FL=gb:BC010332.1
1450816_at	384	2805	7.3	Polg2	Polymerase (DNA directed), gamma 2, accessory subunit						gb:NM_015810.1 /DB_XREF=gi:7657466 /GEN=Polg2 /FEA=FLmRNA /CNT=18 /TID=Mm.859.1 /TIER=FL /STK=0 /UG=Mm.859 /LL=50776 /DEF=Mus musculus polymerase, gamma 2 (Polg2), mRNA. /PROD=mitochondrial polymerase gamma 2 /FL=gb:NM_015810.1 gb:AF177202.1
1418250_at	320	2220	6.94	Arfl4	ADP-ribosylation factor 4-like						gb:NM_025404.1 /DB_XREF=gi:13384791 /GEN=1110036H21Rik /FEA=FLmRNA /CNT=50 /TID=Mm.5376.1 /TIER=FL+Stack /STK=27 /UG=Mm.5376 /LL=66182 /DEF=Mus musculus RIKEN cDNA 1110036H21 gene (1110036H21Rik), mRNA. /PROD=RIKEN cDNA 1110036H21 /FL=gb:BC016113.1 gb:NM_025404.1
1435096_at	700	4707	6.72	Ric8b	Resistance to inhibitors of cholinesterase 8 homolog B (C. elegans)	1439724_at					gb:BB667093 /DB_XREF=gi:16398542 /DB_XREF=BB667093 /CLONE=4022435G01 /FEA=EST /CNT=31 /TID=Mm.18936.1 /TIER=Stack /STK=20 /UG=Mm.18936 /UG_TITLE=ESTs, Weakly similar to synembryn (Mus musculus) (M.musculus)
1431892_a_at	208	1364	6.56								gb:AK011892.1 /DB_XREF=gi:12848296 /FEA=mRNA /CNT=1 /TID=Mm.54993.1 /TIER=ConsEnd /STK=0 /UG=Mm.54993 /LL=72469 /UG_GENE=2610205J15Rik /UG_TITLE=RIKEN cDNA 2610205J15 gene /DEF=Mus musculus 10 days embryo whole body cDNA, RIKEN full-length enriched library, clone:2610205J15:Phosphatidylinositol-specific phospholipase C, X domain containing protein, full insert sequence.
1437626_at	570	3645	6.39	Zfp36l2	Zinc finger protein 36, C3H type-like 2						gb:BB031791 /DB_XREF=gi:15403585 /DB_XREF=BB031791 /CLONE=5830467I20 /FEA=EST /CNT=235 /TID=Mm.28161.2 /TIER=Stack /STK=15 /UG=Mm.28161 /LL=12193 /UG_GENE=Zfp36l2 /UG_TITLE=zinc finger protein 36, C3H type-like 2
1434297_at	182	1159	6.37	E130304F04Rik	RIKEN cDNA E130304F04 gene						gb:BB359887 /DB_XREF=gi:16405851 /DB_XREF=BB359887 /CLONE=C030043O08 /FEA=EST /CNT=47 /TID=Mm.38058.1 /TIER=Stack /STK=36 /UG=Mm.38058 /UG_TITLE=ESTs, Weakly similar to PUTATIVE SERINETHREONINE-PROTEIN KINASE MSK (M.musculus)
1427126_at	245	1417	5.78	Hspa1b	Heat shock protein 1B	1427127_x_at	1452318_a_at	1452388_at			gb:M12573.1 /DB_XREF=gi:194018 /FEA=mRNA /CNT=23 /TID=Mm.6388.1 /TIER=Stack /STK=15 /UG=Mm.6388 /LL=15511 /UG_GENE=Hsp70-1 /UG_TITLE=heat shock protein, 70 kDa 1 /DEF=Mouse heat shock protein (hsp68) mRNA, clone MHS214, partial cds.
1449421_a_at	530	3048	5.75	Kcne2	Potassium voltage-gated channel, Isk-related subfamily, gene 2						gb:NM_134110.1 /DB_XREF=gi:19882204 /GEN=2200002I16Rik /FEA=FLmRNA /CNT=17 /TID=Mm.156736.1 /TIER=FL+Stack /STK=11 /UG=Mm.156736 /LL=106387 /DEF=Mus musculus RIKEN cDNA 2200002I16 gene (2200002I16Rik), mRNA. /PROD=minK-related peptide 1 /FL=gb:NM_134110.1
1438160_x_at	857	4593	5.36			1455803_at					gb:AV348121 /DB_XREF=gi:6389180 /DB_XREF=AV348121 /CLONE=6430631M08 /FEA=EST /CNT=12 /TID=Mm.133687.2 /TIER=Stack /STK=12 /UG=Mm.133687 /UG_TITLE=ESTs, Weakly similar to RIKEN cDNA 1700022M03 (Mus musculus) (M.musculus)
1419647_a_at	530	2803	5.29	Ier3	Immediate early response 3						gb:NM_133662.1 /DB_XREF=gi:19526807 /GEN=Ier3 /FEA=FLmRNA /CNT=77 /TID=Mm.25613.1 /TIER=FL /STK=7 /UG=Mm.25613 /LL=15937 /DEF=Mus musculus immediate early response 3 (Ier3), mRNA. /PROD=immediate early response 3 /FL=gb:BC006950.1 gb:NM_133662.1
1450144_at	327	1698	5.19	Pla2r1	Phospholipase A2 receptor 1						gb:NM_008867.1 /DB_XREF=gi:6679364 /GEN=Pla2g1br /FEA=FLmRNA /CNT=16 /TID=Mm.5092.1 /TIER=FL /STK=2 /UG=Mm.5092 /LL=18779 /DEF=Mus musculus phospholipase A2, group IB, pancreas, receptor (Pla2g1br), mRNA. /PROD=phospholipase A2, group IB, pancreas, receptor /FL=gb:NM_008867.1 gb:D30779.1
1436402_at	744	3724	5.01	Hlrc1	HEAT-like (PBS lyase) repeat containing 1						gb:BG292769 /DB_XREF=gi:13051936 /DB_XREF=602389453F1 /CLONE=IMAGE:4501357 /FEA=EST /CNT=14 /TID=Mm.4022.2 /TIER=Stack /STK=9 /UG=Mm.4022 /LL=102115 /UG_GENE=1110033C18Rik /UG_TITLE=RIKEN cDNA 1110033C18 gene
1418029_at	910	4533	4.98	Faim	Fas apoptotic inhibitory molecule						gb:NM_011810.1 /DB_XREF=gi:6753815 /GEN=Faim /FEA=FLmRNA /CNT=60 /TID=Mm.74605.1 /TIER=FL+Stack /STK=31 /UG=Mm.74605 /LL=23873 /DEF=Mus musculus Fas apoptotic inhibitory molecule (Faim), mRNA. /PROD=Fas apoptotic inhibitory molecule /FL=gb:AF130367.1 gb:NM_011810.1
1425891_a_at	414	2025	4.89	Grtp1	GH regulated TBC protein 1	1439150_x_at					gb:AF329833.1 /DB_XREF=gi:18307766 /FEA=FLmRNA /CNT=3 /TID=Mm.34901.2 /TIER=FL /STK=1 /UG=Mm.34901 /LL=66790 /UG_GENE=Grtp1 /DEF=Mus musculus GH regulated TBC protein-1 mRNA, complete cds. /PROD=GH regulated TBC protein-1 /FL=gb:AF329833.1
1435366_at	674	3270	4.85	D430042O09Rik	RIKEN cDNA D430042O09 gene	1443334_at					gb:BB486367 /DB_XREF=gi:16441380 /DB_XREF=BB486367 /CLONE=D430036C22 /FEA=EST /CNT=23 /TID=Mm.27029.1 /TIER=Stack /STK=17 /UG=Mm.27029 /UG_TITLE=ESTs, Weakly similar to T00330 hypothetical protein KIAA0556 (H.sapiens)
1444230_at	340	1620	4.76								gb:BB279920 /DB_XREF=gi:8976943 /DB_XREF=BB279920 /CLONE=A930021M13 /FEA=EST /CNT=5 /TID=Mm.125511.1 /TIER=ConsEnd /STK=2 /UG=Mm.125511 /UG_TITLE=ESTs, Weakly similar to A34615 profilaggrin - rat (R.norvegicus)
1455140_at	814	3862	4.74	A330068P14Rik	RIKEN cDNA A330068P14 gene						gb:AV376568 /DB_XREF=gi:15412300 /DB_XREF=AV376568 /CLONE=9130211A20 /FEA=EST /CNT=28 /TID=Mm.33118.1 /TIER=Stack /STK=23 /UG=Mm.33118 /LL=103854 /UG_GENE=AI848332 /UG_TITLE=expressed sequence AI848332
1424312_at	757	3562	4.71	Adipor1	Adiponectin receptor 1	1439017_x_at	1451311_a_at				gb:BG065410 /DB_XREF=gi:12547973 /DB_XREF=H3030G10-3 /CLONE=H3030G10 /FEA=FLmRNA /CNT=192 /TID=Mm.205010.1 /TIER=Stack /STK=9 /UG=Mm.205010 /LL=72674 /UG_GENE=2810031L11Rik /UG_TITLE=RIKEN cDNA 2810031L11 gene /FL=gb:BC014875.1
1457083_at	667	3102	4.65		Transcribed locus						gb:BB278392 /DB_XREF=gi:16401065 /DB_XREF=BB278392 /CLONE=A930010M14 /FEA=EST /CNT=7 /TID=Mm.134533.1 /TIER=ConsEnd /STK=5 /UG=Mm.134533 /UG_TITLE=ESTs
1429791_at	295	1370	4.64	Cks1b	CDC28 protein kinase 1b	1440683_at					gb:AK020807.1 /DB_XREF=gi:12861506 /FEA=mRNA /CNT=14 /TID=Mm.95741.1 /TIER=Stack /STK=8 /UG=Mm.95741 /LL=77940 /UG_GENE=A930004D18Rik /UG_TITLE=RIKEN cDNA A930004D18 gene /DEF=Mus musculus adult retina cDNA, RIKEN full-length enriched library, clone:A930004D18:unclassifiable transcript, full insert sequence.
1452672_at	610	2758	4.52	Thoc5	THO complex 5						gb:AK006840.1 /DB_XREF=gi:12840117 /FEA=mRNA /CNT=125 /TID=Mm.28969.1 /TIER=Stack /STK=102 /UG=Mm.28969 /LL=73404 /UG_GENE=1700060C24Rik /UG_TITLE=RIKEN cDNA 1700060C24 gene /DEF=Mus musculus adult male testis cDNA, RIKEN full-length enriched library, clone:1700060C24:homolog to PLACENTAL PROTEIN (FRAGMENT), full insert sequence.
1422974_at	276	1244	4.51	Nt5e	5' nucleotidase, ecto	1428547_at					gb:NM_011851.1 /DB_XREF=gi:6754899 /GEN=Nt5e /FEA=FLmRNA /CNT=18 /TID=Mm.56948.1 /TIER=FL /STK=0 /UG=Mm.56948 /LL=23959 /DEF=Mus musculus 5 nucleotidase, ecto (Nt5e), mRNA. /PROD=5 nucleotidase, ecto /FL=gb:NM_011851.1 gb:L12059.1
1426816_at	465	2082	4.48	Ccdc64	Coiled-coil domain containing 64						gb:BC024804.1 /DB_XREF=gi:19354444 /FEA=mRNA /CNT=76 /TID=Mm.38300.1 /TIER=Stack /STK=59 /UG=Mm.38300 /DEF=Mus musculus, similar to supported by EST AA121608 (NID:g1679223) and Genscan, clone IMAGE:5361390, mRNA, partial cds. /PROD=similar to supported by EST AA121608(NID:g1679223) and Genscan
1423294_at	701	3121	4.45	Mest	Mesoderm specific transcript						gb:AW555393 /DB_XREF=gi:7200912 /DB_XREF=L0255C06-3 /CLONE=L0255C06 /FEA=FLmRNA /CNT=396 /TID=Mm.1089.1 /TIER=Stack /STK=17 /UG=Mm.1089 /LL=17294 /UG_GENE=Mest /UG_TITLE=mesoderm specific transcript /FL=gb:NM_008590.1 gb:D16262.1 gb:BC006639.1
1457701_at	926	4085	4.41	Tmem136	Transmembrane protein 136						gb:BB457336 /DB_XREF=gi:16426144 /DB_XREF=BB457336 /CLONE=D130051F08 /FEA=EST /CNT=8 /TID=Mm.133032.1 /TIER=ConsEnd /STK=3 /UG=Mm.133032 /UG_TITLE=ESTs
1437021_at	240	1025	4.27	Arl13b	ADP-ribosylation factor-like 13B						gb:AV225959 /DB_XREF=gi:16385275 /DB_XREF=AV225959 /CLONE=3830432K11 /FEA=EST /CNT=37 /TID=Mm.96833.2 /TIER=Stack /STK=29 /UG=Mm.96833 /LL=68146 /UG_GENE=C530009C10Rik /UG_TITLE=RIKEN cDNA C530009C10 gene
1416825_at	275	1157	4.21	Snta1	Syntrophin, acidic 1						gb:NM_009228.1 /DB_XREF=gi:6678056 /GEN=Snta1 /FEA=FLmRNA /CNT=95 /TID=Mm.1541.1 /TIER=FL+Stack /STK=68 /UG=Mm.1541 /LL=20648 /DEF=Mus musculus syntrophin, acidic 1 (Snta1), mRNA. /PROD=syntrophin, acidic 1 /FL=gb:BC018546.1 gb:U00677.1 gb:NM_009228.1
1426223_at	364	1492	4.1	2810439F02Rik	RIKEN cDNA 2810439F02 gene						gb:BC020021.1 /DB_XREF=gi:18043658 /FEA=FLmRNA /CNT=78 /TID=Mm.24629.1 /TIER=FL+Stack /STK=47 /UG=Mm.24629 /LL=72747 /UG_GENE=2810439F02Rik /DEF=Mus musculus, RIKEN cDNA 2810439F02 gene, clone MGC:27740 IMAGE:2648772, mRNA, complete cds. /PROD=RIKEN cDNA 2810439F02 gene /FL=gb:BC020021.1
1444696_at	391	1534	3.92	BC059841	CDNA sequence BC059841						gb:AV374217 /DB_XREF=gi:16397941 /DB_XREF=AV374217 /CLONE=9130007L17 /FEA=EST /CNT=4 /TID=Mm.98052.1 /TIER=ConsEnd /STK=2 /UG=Mm.98052 /UG_TITLE=ESTs
1447278_at	344	1303	3.79	Cep164	Centrosomal protein 164						gb:BB822306 /DB_XREF=gi:16994935 /DB_XREF=BB822306 /CLONE=G830018C12 /FEA=EST /CNT=2 /TID=Mm.213896.1 /TIER=ConsEnd /STK=2 /UG=Mm.213896 /UG_TITLE=ESTs
1460601_at	444	1676	3.77	Myrip	Myosin VIIA and Rab interacting protein						gb:BB429683 /DB_XREF=gi:16424011 /DB_XREF=BB429683 /CLONE=C630029J04 /FEA=EST /CNT=13 /TID=Mm.40827.1 /TIER=Stack /STK=11 /UG=Mm.40827 /UG_TITLE=ESTs
1437003_at	299	1125	3.76		Transcribed locus						gb:BB323930 /DB_XREF=gi:16403486 /DB_XREF=BB323930 /CLONE=B430101L16 /FEA=EST /CNT=35 /TID=Mm.17706.1 /TIER=Stack /STK=30 /UG=Mm.17706 /UG_TITLE=ESTs
1416387_at	914	3375	3.69	Pip5k2c	Phosphatidylinositol-4-phosphate 5-kinase, type II, gamma						gb:BC021383.1 /DB_XREF=gi:18204067 /FEA=FLmRNA /CNT=181 /TID=Mm.22682.1 /TIER=FL+Stack /STK=93 /UG=Mm.22682 /LL=117150 /UG_GENE=Pip5k2c /DEF=Mus musculus, phosphatidylinositol-4-phosphate 5-kinase, type II, gamma, clone MGC:29371 IMAGE:5042933, mRNA, complete cds. /PROD=phosphatidylinositol-4-phosphate 5-kinase, typeII, gamma /FL=gb:AB054591.1 gb:BC021383.1 gb:NM_054097.1
1449945_at	853	3151	3.69	Ppargc1b	Peroxisome proliferative activated receptor, gamma, coactivator 1 beta						gb:NM_133249.1 /DB_XREF=gi:18875425 /GEN=LOC170826 /FEA=FLmRNA /CNT=31 /TID=Mm.35750.1 /TIER=FL /STK=3 /UG=Mm.35750 /LL=170826 /DEF=Mus musculus PPAR gamma coactivator-1beta protein (LOC170826), mRNA. /PROD=PPAR gamma coactivator-1beta protein /FL=gb:AF453324.1 gb:NM_133249.1
1449519_at	345	1250	3.62	Gadd45a	Growth arrest and DNA-damage-inducible 45 alpha						gb:NM_007836.1 /DB_XREF=gi:6681148 /GEN=Gadd45a /FEA=FLmRNA /CNT=27 /TID=Mm.1236.1 /TIER=FL+Stack /STK=8 /UG=Mm.1236 /LL=13197 /DEF=Mus musculus growth arrest and DNA-damage-inducible 45 alpha (Gadd45a), mRNA. /PROD=growth arrest and DNA-damage-inducible 45 alpha /FL=gb:NM_007836.1 gb:BC011141.1 gb:L28177.1
1424735_at	462	1626	3.52	Slc25a25	Solute carrier family 25 (mitochondrial carrier, phosphate carrier), member 25						gb:BC019978.1 /DB_XREF=gi:18043564 /FEA=FLmRNA /CNT=220 /TID=Mm.37395.1 /TIER=FL+Stack /STK=17 /UG=Mm.37395 /DEF=Mus musculus, Similar to KIAA1896 protein, clone MGC:28954 IMAGE:4239441, mRNA, complete cds. /PROD=Similar to KIAA1896 protein /FL=gb:BC022114.1 gb:BC019978.1
1428394_at	317	1063	3.35								gb:AK005293.1 /DB_XREF=gi:12837747 /GEN=Nfatc2 /FEA=mRNA /CNT=69 /TID=Mm.116802.5 /TIER=Stack /STK=45 /UG=Mm.116802 /LL=18019 /UG_TITLE=nuclear factor of activated T-cells, cytoplasmic 2 /DEF=Mus musculus adult male cerebellum cDNA, RIKEN full-length enriched library, clone:1500019N11:nuclear factor of activated T-cells, cytoplasmic 2, full insert sequence.
1427166_a_at	435	1414	3.25	Spg7	Spastic paraplegia 7 homolog (human)						gb:BM212545 /DB_XREF=gi:17770101 /DB_XREF=C0823C09-3 /CLONE=C0823C09 /FEA=mRNA /CNT=46 /TID=Mm.29620.1 /TIER=Stack /STK=12 /UG=Mm.29620 /UG_TITLE=Mus musculus, clone IMAGE:5040761, mRNA, partial cds
1448019_at	326	1061	3.25								gb:BE849316 /DB_XREF=gi:10307655 /DB_XREF=uw05g11.y1 /CLONE=IMAGE:3415844 /FEA=EST /CNT=11 /TID=Mm.24343.1 /TIER=ConsEnd /STK=0 /UG=Mm.24343 /UG_TITLE=ESTs
1436102_at	495	1597	3.23	Sec22c	SEC22 vesicle trafficking protein-like C (S. cerevisiae)	1456091_at					gb:BB425408 /DB_XREF=gi:16423594 /DB_XREF=BB425408 /CLONE=C530046H07 /FEA=EST /CNT=15 /TID=Mm.31421.1 /TIER=Stack /STK=11 /UG=Mm.31421 /UG_TITLE=ESTs
1426035_at	446	1418	3.18	LOC574418	Hypothetical LOC574418						gb:BC026459.1 /DB_XREF=gi:20071427 /FEA=FLmRNA /CNT=1 /TID=Mm.200975.2 /TIER=FL /STK=1 /UG=Mm.200975 /LL=20366 /UG_GENE=Serf2 /DEF=Mus musculus, clone MGC:31450 IMAGE:4481776, mRNA, complete cds. /PROD=Unknown (protein for MGC:31450) /FL=gb:BC026459.1
1439983_a_at	389	1238	3.18	Accn3	Amiloride-sensitive cation channel 3						gb:AW743006 /DB_XREF=gi:7654813 /DB_XREF=up55b10.x1 /CLONE=IMAGE:2779963 /FEA=EST /CNT=8 /TID=Mm.23110.1 /TIER=ConsEnd /STK=6 /UG=Mm.23110 /LL=101011 /UG_GENE=AW742291 /UG_TITLE=expressed sequence AW742291
1418406_at	326	1034	3.17	Pde8a	Phosphodiesterase 8A						gb:NM_008803.1 /DB_XREF=gi:6679248 /GEN=Pde8a /FEA=FLmRNA /CNT=53 /TID=Mm.9757.1 /TIER=FL+Stack /STK=24 /UG=Mm.9757 /LL=18584 /DEF=Mus musculus phosphodiesterase 8A (Pde8a), mRNA. /PROD=phosphodiesterase 8A /FL=gb:AF067806.1 gb:NM_008803.1
1447034_at	409	1279	3.13	Tnpo1	Transportin 1						gb:BM204579 /DB_XREF=gi:17759467 /DB_XREF=C0271D02-3 /CLONE=C0271D02 /FEA=EST /CNT=2 /TID=Mm.217701.1 /TIER=ConsEnd /STK=2 /UG=Mm.217701 /UG_TITLE=ESTs
1435268_at	404	1263	3.13								gb:BB274357 /DB_XREF=gi:8971378 /DB_XREF=BB274357 /CLONE=A830087L14 /FEA=EST /CNT=22 /TID=Mm.191884.1 /TIER=Stack /STK=18 /UG=Mm.191884 /LL=103299 /UG_GENE=AI847979 /UG_TITLE=expressed sequence AI847979
1455543_at	969	3005	3.1	Klhl18	Kelch-like 18 (Drosophila)						gb:AW545966 /DB_XREF=gi:7191433 /DB_XREF=L0002D11-3 /CLONE=L0002D11 /FEA=EST /CNT=32 /TID=Mm.41744.1 /TIER=Stack /STK=11 /UG=Mm.41744 /LL=102778 /UG_GENE=AW545966 /UG_TITLE=expressed sequence AW545966
1443940_at	983	2991	3.04	Lrrc22	Leucine rich repeat containing 22						gb:BB278297 /DB_XREF=gi:15410987 /DB_XREF=BB278297 /CLONE=A930010E21 /FEA=EST /CNT=9 /TID=Mm.134302.1 /TIER=ConsEnd /STK=2 /UG=Mm.134302 /UG_TITLE=ESTs, Weakly similar to T42626 secreted leucine-rich repeat-containing protein SLIT2 - mouse (fragment) (M.musculus)
1434611_at	877	2651	3.02	Rnf123	Ring finger protein 123						gb:BB765679 /DB_XREF=gi:16193669 /DB_XREF=BB765679 /CLONE=G370053P03 /FEA=EST /CNT=48 /TID=Mm.22554.1 /TIER=Stack /STK=28 /UG=Mm.22554 /LL=102479 /UG_GENE=AI317178 /UG_TITLE=expressed sequence AI317178
1442190_at	2	652	326		PREDICTED: Mus musculus hypothetical protein LOC627272 (LOC627272), mRNA						gb:BI736087 /DB_XREF=gi:15713100 /DB_XREF=603359238F1 /CLONE=IMAGE:5366529 /FEA=EST /CNT=6 /TID=Mm.35149.1 /TIER=ConsEnd /STK=3 /UG=Mm.35149 /UG_TITLE=ESTs, Weakly similar to POL2 MOUSE RETROVIRUS-RELATED POL POLYPROTEIN (M.musculus)
1449393_at	2	343	171.5	Sh2d1a	SH2 domain protein 1A						gb:NM_011364.1 /DB_XREF=gi:6755493 /GEN=Sh2d1a /FEA=FLmRNA /CNT=19 /TID=Mm.20880.1 /TIER=FL+Stack /STK=12 /UG=Mm.20880 /LL=20400 /DEF=Mus musculus SH2 domain protein 1A (Sh2d1a), mRNA. /PROD=SH2 domain protein 1A /FL=gb:AF097633.1 gb:AF097632.1 gb:NM_011364.1 gb:AF072903.1
1427388_at	15	456	30.4			1453628_s_at					gb:AJ428068.1 /DB_XREF=gi:18250731 /GEN=Lrrc2 /FEA=mRNA /CNT=16 /TID=Mm.38410.1 /TIER=ConsEnd /STK=2 /UG=Mm.38410 /LL=75733 /DEF=Mus musculus mRNA for leucine-rich repeat-containing 2 protein (Lrrc2 gene). /PROD=leucine-rich repeat-containing 2 protein
1430112_at	23	630	27.39	Wdr66	WD repeat domain 66						gb:AK016965.1 /DB_XREF=gi:12855982 /FEA=mRNA /CNT=5 /TID=Mm.158631.1 /TIER=ConsEnd /STK=4 /UG=Mm.158631 /LL=71245 /UG_GENE=4933428F06Rik /UG_TITLE=RIKEN cDNA 4933428F06 gene /DEF=Mus musculus adult male testis cDNA, RIKEN full-length enriched library, clone:4933428F06:hypothetical protein, full insert sequence.
1453143_at	10	262	26.2	4921509F24Rik	RIKEN cDNA 4921509F24 gene						gb:AK014852.1 /DB_XREF=gi:12852935 /FEA=mRNA /CNT=23 /TID=Mm.78118.1 /TIER=Stack /STK=21 /UG=Mm.78118 /LL=70893 /UG_GENE=4921509F24Rik /UG_TITLE=RIKEN cDNA 4921509F24 gene /DEF=Mus musculus adult male testis cDNA, RIKEN full-length enriched library, clone:4921509F24:similar to BETA-GALACTOSIDASE PRECURSOR (EC 3.2.1.23) (LACTASE) (ACID BETA- GALACTOSIDASE), full insert sequence.
1422127_at	5	103	20.6	Dhh	Desert hedgehog	1434959_at					gb:NM_007857.1 /DB_XREF=gi:6681180 /GEN=Dhh /FEA=FLmRNA /CNT=6 /TID=Mm.70066.1 /TIER=FL /STK=1 /UG=Mm.70066 /LL=13363 /DEF=Mus musculus desert hedgehog homolog, (Drosophila) (Dhh), mRNA. /PROD=desert hedgehog homolog, (Drosophila) /FL=gb:NM_007857.1
1422986_at	54	763	14.13	Esrrb	Estrogen related receptor, beta	1436926_at					gb:NM_011934.1 /DB_XREF=gi:13937382 /GEN=Esrrb /FEA=FLmRNA /CNT=13 /TID=Mm.90048.1 /TIER=FL /STK=0 /UG=Mm.90048 /LL=26380 /DEF=Mus musculus estrogen related receptor, beta (Esrrb), mRNA. /PROD=estrogen related receptor, beta /FL=gb:NM_011934.1
1450789_at	52	640	12.31	Rhpn1	Rhophilin, Rho GTPase binding protein 1						gb:NM_008164.1 /DB_XREF=gi:6680084 /GEN=Grbp /FEA=FLmRNA /CNT=20 /TID=Mm.57052.1 /TIER=FL+Stack /STK=8 /UG=Mm.57052 /LL=14787 /DEF=Mus musculus GTP-rho binding protein 1 (Grbp), mRNA. /PROD=GTP-rho binding protein 1 /FL=gb:U43194.1 gb:NM_008164.1
1446715_at	48	589	12.27	Abca13	ATP-binding cassette, sub-family A (ABC1), member 13						gb:BB503961 /DB_XREF=gi:16442673 /DB_XREF=BB503961 /CLONE=D630045O20 /FEA=EST /CNT=2 /TID=Mm.44160.1 /TIER=ConsEnd /STK=2 /UG=Mm.44160 /UG_TITLE=ESTs
1426027_a_at	22	258	11.73	Arhgap10	Rho GTPase activating protein 10	1440347_at					gb:AF297029.1 /DB_XREF=gi:13310134 /FEA=FLmRNA /CNT=1 /TID=Mm.165974.2 /TIER=FL /STK=1 /UG=Mm.165974 /LL=78514 /UG_GENE=A930033B01Rik /DEF=Mus musculus PSGAP-s mRNA, complete cds, alternatively spliced. /PROD=PSGAP-s /FL=gb:AF297029.1
1443066_at	45	505	11.22		Transcribed locus						gb:BB280150 /DB_XREF=gi:15411074 /DB_XREF=BB280150 /CLONE=A930023O03 /FEA=EST /CNT=3 /TID=Mm.134239.1 /TIER=ConsEnd /STK=3 /UG=Mm.134239 /UG_TITLE=ESTs, Moderately similar to EPIDERMAL GROWTH FACTOR PRECURSOR (M.musculus)
1441518_at	23	248	10.78		Adult retina cDNA, RIKEN full-length enriched library, clone:A930003C13 product:unclassifiable, full insert sequence						gb:BB277231 /DB_XREF=gi:16400956 /DB_XREF=BB277231 /CLONE=A930003C13 /FEA=EST /CNT=4 /TID=Mm.115892.1 /TIER=ConsEnd /STK=4 /UG=Mm.115892 /UG_TITLE=ESTs
1419488_at	16	170	10.63	Tnip2	TNFAIP3 interacting protein 2						gb:NM_139064.1 /DB_XREF=gi:20532343 /GEN=ABIN-2 /FEA=FLmRNA /CNT=37 /TID=Mm.28615.1 /TIER=FL+Stack /STK=9 /UG=Mm.28615 /LL=231130 /DEF=Mus musculus A20 binding inhibitor of NF-kappaB activation-2 (ABIN-2), mRNA. /PROD=A20 binding inhibitor of NF-kappaB activation-2 /FL=gb:NM_139064.1
1418847_at	77	795	10.32	Arg2	Arginase type II	1438841_s_at					gb:NM_009705.1 /DB_XREF=gi:6753109 /GEN=Arg2 /FEA=FLmRNA /CNT=38 /TID=Mm.3506.1 /TIER=FL+Stack /STK=17 /UG=Mm.3506 /LL=11847 /DEF=Mus musculus arginase type II (Arg2), mRNA. /PROD=arginase type II /FL=gb:NM_009705.1 gb:AF032466.1 gb:BC023349.1 gb:U90886.1
1437371_at	49	500	10.2	9930021J17Rik	RIKEN cDNA 9930021J17 gene						gb:BB008528 /DB_XREF=gi:16257098 /DB_XREF=BB008528 /CLONE=4732483E04 /FEA=EST /CNT=30 /TID=Mm.49448.1 /TIER=Stack /STK=19 /UG=Mm.49448 /UG_TITLE=ESTs
1418842_at	29	286	9.86	Hcls1	Hematopoietic cell specific Lyn substrate 1						gb:NM_008225.1 /DB_XREF=gi:6680186 /GEN=Hcls1 /FEA=FLmRNA /CNT=45 /TID=Mm.4091.1 /TIER=FL+Stack /STK=17 /UG=Mm.4091 /LL=15163 /DEF=Mus musculus hematopoietic cell specific Lyn substrate 1 (Hcls1), mRNA. /PROD=hematopoietic cell specific Lyn substrate 1 /FL=gb:D42120.1 gb:NM_008225.1 gb:BC007469.1
1445328_at	31	288	9.29	Col4a4	Procollagen, type IV, alpha 4						gb:BB530633 /DB_XREF=gi:16445801 /DB_XREF=BB530633 /CLONE=E030011A16 /FEA=EST /CNT=3 /TID=Mm.40253.1 /TIER=ConsEnd /STK=2 /UG=Mm.40253 /UG_TITLE=ESTs
1421698_a_at	43	379	8.81	Col19a1	Procollagen, type XIX, alpha 1						gb:NM_007733.1 /DB_XREF=gi:6680965 /GEN=Col19a1 /FEA=FLmRNA /CNT=2 /TID=Mm.6252.1 /TIER=FL /STK=2 /UG=Mm.6252 /LL=12823 /DEF=Mus musculus procollagen, type XIX, alpha 1 (Col19a1), mRNA. /PROD=procollagen, type XIX, alpha 1 /FL=gb:AB000636.1 gb:NM_007733.1
1436287_at	34	298	8.76		13 days embryo head cDNA, RIKEN full-length enriched library, clone:3110033I20 product:hypothetical protein, full insert sequence						gb:BF466943 /DB_XREF=gi:11536126 /DB_XREF=UI-M-CG0p-brb-g-11-0-UI.s1 /CLONE=UI-M-CG0p-brb-g-11-0-UI /FEA=EST /CNT=10 /TID=Mm.58847.1 /TIER=Stack /STK=10 /UG=Mm.58847 /UG_TITLE=ESTs
1457401_at	46	402	8.74	Dnahc9	Dynein, axonemal, heavy chain 9						gb:AW492102 /DB_XREF=gi:7062383 /DB_XREF=UI-M-BH3-atj-c-10-0-UI.s1 /CLONE=UI-M-BH3-atj-c-10-0-UI /FEA=EST /CNT=5 /TID=Mm.102033.1 /TIER=ConsEnd /STK=4 /UG=Mm.102033 /UG_TITLE=ESTs, Weakly similar to DYHC_MOUSE DYNEIN HEAVY CHAIN, CYTOSOLIC (DYHC) (CYTOPLASMIC DYNEIN HEAVY CHAIN) (M.musculus)
1442686_at	34	282	8.29	Dpf3	D4, zinc and double PHD fingers, family 3	1450162_at					gb:AI849127 /DB_XREF=gi:5493033 /DB_XREF=UI-M-AJ1-agy-a-11-0-UI.s1 /CLONE=UI-M-AJ1-agy-a-11-0-UI /FEA=EST /CNT=4 /TID=Mm.101639.1 /TIER=ConsEnd /STK=3 /UG=Mm.101639 /UG_TITLE=ESTs
1440916_at	34	280	8.24	2510049J12Rik	RIKEN cDNA 2510049J12 gene						gb:BE200006 /DB_XREF=gi:8712175 /DB_XREF=ug56f04.x1 /CLONE=IMAGE:1546399 /FEA=EST /CNT=11 /TID=Mm.133694.1 /TIER=ConsEnd /STK=4 /UG=Mm.133694 /UG_TITLE=ESTs, Weakly similar to W10D9.3.p (Caenorhabditis elegans) (C.elegans)
1418789_at	64	514	8.03								gb:NM_133742.1 /DB_XREF=gi:19526943 /GEN=2210008K22Rik /FEA=FLmRNA /CNT=36 /TID=Mm.95705.1 /TIER=FL+Stack /STK=18 /UG=Mm.95705 /LL=72291 /DEF=Mus musculus RIKEN cDNA 2210008K22 gene (2210008K22Rik), mRNA. /PROD=RIKEN cDNA 2210008K22 /FL=gb:NM_133742.1 gb:AF367760.1
1437093_at	17	136	8	Dnaic1	Dynein, axonemal, intermediate chain 1	1437094_x_at					gb:BB360504 /DB_XREF=gi:15411671 /DB_XREF=BB360504 /CLONE=C030047J03 /FEA=EST /CNT=26 /TID=Mm.79127.1 /TIER=Stack /STK=26 /UG=Mm.79127 /LL=100477 /UG_GENE=BB124644 /UG_TITLE=expressed sequence BB124644
1451506_at	71	565	7.96	Mef2c	Myocyte enhancer factor 2C	1424852_at	1439946_at	1421028_a_at	1451507_at	1421027_a_at	gb:BC026841.1 /DB_XREF=gi:20070855 /FEA=FLmRNA /CNT=127 /TID=Mm.24001.2 /TIER=FL+Stack /STK=13 /UG=Mm.24001 /LL=17260 /UG_GENE=Mef2c /DEF=Mus musculus, Similar to MADS box transcription enhancer factor 2, polypeptide C (myocyte enhancer factor 2C), clone MGC:25468 IMAGE:4481227, mRNA, complete cds. /PROD=Similar to MADS box transcription enhancerfactor 2, polypeptide C (myocyte enhancer factor 2C…
1418589_a_at	58	460	7.93	Mlf1	Myeloid leukemia factor 1						gb:AF100171.1 /DB_XREF=gi:4106525 /GEN=Mlf1 /FEA=FLmRNA /CNT=42 /TID=Mm.10414.1 /TIER=FL+Stack /STK=21 /UG=Mm.10414 /LL=17349 /DEF=Mus musculus myelodysplasiamyeloid leukemia factor 1 (Mlf1) mRNA, complete cds. /PROD=myelodysplasiamyeloid leukemia factor 1 /FL=gb:AF009515.1 gb:NM_010801.1 gb:AF100171.1
1435393_at	43	329	7.65		CDNA, clone:Y0G0149N04, strand:unspecified						gb:BB765942 /DB_XREF=gi:16196830 /DB_XREF=BB765942 /CLONE=G370058H03 /FEA=EST /CNT=19 /TID=Mm.152677.1 /TIER=Stack /STK=17 /UG=Mm.152677 /UG_TITLE=ESTs
1444603_at	49	349	7.12	2810030D12Rik	RIKEN cDNA 2810030D12 gene						gb:AI648973 /DB_XREF=gi:4729807 /DB_XREF=uk33f01.x1 /CLONE=IMAGE:1970809 /FEA=EST /CNT=4 /TID=Mm.74819.1 /TIER=ConsEnd /STK=2 /UG=Mm.74819 /UG_TITLE=ESTs
1420372_at	119	788	6.62	Sntb2	Syntrophin, basic 2						gb:AI893916 /DB_XREF=gi:5599818 /DB_XREF=mc42h06.y1 /CLONE=IMAGE:351227 /FEA=FLmRNA /CNT=65 /TID=Mm.30228.1 /TIER=Stack /STK=16 /UG=Mm.30228 /LL=20650 /UG_GENE=Sntb2 /UG_TITLE=syntrophin, basic 2 /FL=gb:NM_009229.1 gb:U00678.1
1453264_at	46	304	6.61	Marveld3	MARVEL (membrane-associating) domain containing 3						gb:AK007346.1 /DB_XREF=gi:12840834 /FEA=mRNA /CNT=30 /TID=Mm.31998.1 /TIER=Stack /STK=9 /UG=Mm.31998 /LL=73608 /UG_GENE=1810006A16Rik /UG_TITLE=RIKEN cDNA 1810006A16 gene /DEF=Mus musculus 10 day old male pancreas cDNA, RIKEN full-length enriched library, clone:1810006A16:hypothetical protein, full insert sequence.
1441218_at	28	175	6.25	ttc21a	Tetratricopeptide repeat domain 21A						gb:AV272776 /DB_XREF=gi:16390194 /DB_XREF=AV272776 /CLONE=4931433J21 /FEA=EST /CNT=5 /TID=Mm.189573.1 /TIER=ConsEnd /STK=4 /UG=Mm.189573 /UG_TITLE=ESTs
1419694_at	29	181	6.24	St8sia1	ST8 alpha-N-acetyl-neuraminide alpha-2,8-sialyltransferase 1	1419695_at	1455695_at				gb:NM_011374.1 /DB_XREF=gi:6755515 /GEN=Siat8a /FEA=FLmRNA /CNT=30 /TID=Mm.12826.1 /TIER=FL /STK=7 /UG=Mm.12826 /LL=20449 /DEF=Mus musculus sialyltransferase 8 (alpha-2, 8-sialytransferase) A (Siat8a), mRNA. /PROD=sialyltransferase 8 (alpha-2,8-sialytransferase) A /FL=gb:NM_011374.1 gb:L38677.1
1438574_at	45	268	5.96	Gpr152	G protein-coupled receptor 152						gb:BB277104 /DB_XREF=gi:16400936 /DB_XREF=BB277104 /CLONE=A930002F03 /FEA=EST /CNT=11 /TID=Mm.131677.1 /TIER=Stack /STK=10 /UG=Mm.131677 /UG_TITLE=ESTs
1445710_x_at	169	977	5.78	1110051B16Rik	RIKEN cDNA 1110051B16 gene						gb:AV321065 /DB_XREF=gi:6290898 /DB_XREF=AV321065 /CLONE=6030430K23 /FEA=EST /CNT=3 /TID=Mm.80771.1 /TIER=ConsEnd /STK=2 /UG=Mm.80771 /UG_TITLE=ESTs
1418014_a_at	145	822	5.67	B4galt1	UDP-Gal:betaGlcNAc beta 1,4- galactosyltransferase, polypeptide 1						gb:NM_022305.1 /DB_XREF=gi:11602909 /GEN=B4galt1 /FEA=FLmRNA /CNT=84 /TID=Mm.15622.1 /TIER=FL+Stack /STK=31 /UG=Mm.15622 /LL=14595 /DEF=Mus musculus UDP-Gal:betaGlcNAc beta 1,4- galactosyltransferase, polypeptide 1 (B4galt1), mRNA. /PROD=glycoprotein galactosyltransferase beta 1, 4 /FL=gb:J03880.1 gb:NM_022305.1
1429413_at	73	404	5.53	Cpm	Carboxypeptidase M	1453009_at					gb:AK017670.1 /DB_XREF=gi:12857026 /FEA=mRNA /CNT=110 /TID=Mm.41748.1 /TIER=Stack /STK=23 /UG=Mm.41748 /LL=70574 /UG_GENE=5730456K23Rik /UG_TITLE=RIKEN cDNA 5730456K23 gene /DEF=Mus musculus 8 days embryo whole body cDNA, RIKEN full-length enriched library, clone:5730456K23:homolog to CARBOXYPEPTIDASE M PRECURSOR (EC 3.4.17.12), full insert sequence.
1434573_at	90	481	5.34	Traf3ip3	TRAF3 interacting protein 3						gb:BE986588 /DB_XREF=gi:10661071 /DB_XREF=UI-M-CG0p-bew-c-09-0-UI.s1 /CLONE=UI-M-CG0p-bew-c-09-0-UI /FEA=EST /CNT=47 /TID=Mm.70956.1 /TIER=Stack /STK=29 /UG=Mm.70956 /LL=98261 /UG_GENE=AI115021 /UG_TITLE=expressed sequence AI115021
1422944_a_at	19	100	5.26	Diap3	Diaphanous homolog 3 (Drosophila)						gb:NM_019670.1 /DB_XREF=gi:9789930 /GEN=Diap3 /FEA=FLmRNA /CNT=37 /TID=Mm.28068.1 /TIER=FL /STK=1 /UG=Mm.28068 /LL=56419 /DEF=Mus musculus diaphanous homolog 3 (Drosophila) (Diap3), mRNA. /PROD=diaphanous homolog 3 (Drosophila) /FL=gb:NM_019670.1 gb:AF094519.1
1455455_at	145	743	5.12	Glt28d2	Glycosyltransferase 28 domain containing 2						gb:BB008997 /DB_XREF=gi:15403219 /DB_XREF=BB008997 /CLONE=4732486J07 /FEA=EST /CNT=15 /TID=Mm.54813.1 /TIER=Stack /STK=13 /UG=Mm.54813 /UG_TITLE=ESTs, Weakly similar to R10D12.12.p (Caenorhabditis elegans) (C.elegans)
1429662_at	138	697	5.05								gb:AK015003.1 /DB_XREF=gi:12853168 /FEA=mRNA /CNT=16 /TID=Mm.56002.1 /TIER=Stack /STK=11 /UG=Mm.56002 /LL=70951 /UG_GENE=4921536I21Rik /UG_TITLE=RIKEN cDNA 4921536I21 gene /DEF=Mus musculus adult male testis cDNA, RIKEN full-length enriched library, clone:4921536I21:hypothetical protein, full insert sequence.
1441969_at	143	721	5.04	Trim36	Tripartite motif-containing 36						gb:BM933729 /DB_XREF=gi:19392881 /DB_XREF=UI-M-BZ1-bjq-h-08-0-UI.r2 /CLONE=UI-M-BZ1-bjq-h-08-0-UI /FEA=EST /CNT=18 /TID=Mm.206259.1 /TIER=ConsEnd /STK=3 /UG=Mm.206259 /LL=28105 /UG_GENE=D18Wsu100e /UG_TITLE=DNA segment, Chr 18, Wayne State University 100, expressed
1424977_at	65	320	4.92	4930418G15Rik	RIKEN cDNA 4930418G15 gene	1430283_s_at					gb:BC022722.1 /DB_XREF=gi:18490770 /FEA=FLmRNA /CNT=13 /TID=Mm.60650.1 /TIER=FL+Stack /STK=10 /UG=Mm.60650 /LL=69312 /UG_GENE=1700011J18Rik /DEF=Mus musculus, RIKEN cDNA 1700011J18 gene, clone MGC:31545 IMAGE:4503172, mRNA, complete cds. /PROD=RIKEN cDNA 1700011J18 gene /FL=gb:BC022722.1
1450699_at	119	563	4.73	Selenbp1	Selenium binding protein 1						gb:NM_009150.1 /DB_XREF=gi:6677906 /GEN=Selenbp1 /FEA=FLmRNA /CNT=79 /TID=Mm.636.1 /TIER=FL+Stack /STK=22 /UG=Mm.636 /LL=20341 /DEF=Mus musculus selenium binding protein 1 (Selenbp1), mRNA. /PROD=selenium binding protein 1 /FL=gb:NM_009150.1
1417244_a_at	74	342	4.62	Irf7	Interferon regulatory factor 7						gb:NM_016850.1 /DB_XREF=gi:8567363 /GEN=Irf7 /FEA=FLmRNA /CNT=88 /TID=Mm.3233.1 /TIER=FL+Stack /STK=51 /UG=Mm.3233 /LL=54123 /DEF=Mus musculus interferon regulatory factor 7 (Irf7), mRNA. /PROD=interferon regulatory factor 7 /FL=gb:U73037.1 gb:NM_016850.1
1420730_a_at	117	530	4.53	Tcp11	T-complex protein 11						gb:NM_013687.1 /DB_XREF=gi:7305562 /GEN=Tcp11 /FEA=FLmRNA /CNT=6 /TID=Mm.29758.1 /TIER=FL /STK=3 /UG=Mm.29758 /LL=21463 /DEF=Mus musculus t-complex protein 11 (Tcp11), mRNA. /PROD=t-complex protein 11 /FL=gb:BC016610.1 gb:NM_013687.1
1423452_at	120	535	4.46	Stk17b	Serine/threonine kinase 17b (apoptosis-inducing)	1450997_at					gb:BG064688 /DB_XREF=gi:12547262 /DB_XREF=H3022H03-3 /CLONE=H3022H03 /FEA=FLmRNA /CNT=149 /TID=Mm.25559.1 /TIER=Stack /STK=10 /UG=Mm.25559 /LL=98267 /UG_GENE=AI120141 /UG_TITLE=expressed sequence AI120141 /FL=gb:BC006579.1 gb:NM_133810.1
1431659_at	75	328	4.37	E130103I17Rik	RIKEN cDNA E130103I17 gene						gb:AK017890.1 /DB_XREF=gi:12857372 /FEA=mRNA /CNT=2 /TID=Mm.158192.1 /TIER=ConsEnd /STK=1 /UG=Mm.158192 /LL=68255 /UG_GENE=C330014O21Rik /UG_TITLE=RIKEN cDNA C330014O21 gene /DEF=Mus musculus adult male thymus cDNA, RIKEN full-length enriched library, clone:5830402N19:unclassifiable, full insert sequence.
1442180_at	65	278	4.28	Dleu7	Deleted in lymphocytic leukemia, 7						gb:BB382040 /DB_XREF=gi:16408049 /DB_XREF=BB382040 /CLONE=C230017D13 /FEA=EST /CNT=6 /TID=Mm.127330.1 /TIER=ConsEnd /STK=3 /UG=Mm.127330 /UG_TITLE=ESTs
1437285_at	89	373	4.19	1110020G09Rik	RIKEN cDNA 1110020G09 gene	1437286_x_at	1437287_at	1453422_a_at			gb:BG070096 /DB_XREF=gi:12552588 /DB_XREF=H3082G01-3 /CLONE=H3082G01 /FEA=EST /CNT=136 /TID=Mm.42110.2 /TIER=Stack /STK=20 /UG=Mm.42110 /LL=68646 /UG_GENE=1110020G09Rik /UG_TITLE=RIKEN cDNA 1110020G09 gene
1436481_at	74	305	4.12		Transcribed locus						gb:BB729271 /DB_XREF=gi:16112546 /DB_XREF=BB729271 /CLONE=E860106N01 /FEA=EST /CNT=9 /TID=Mm.133988.1 /TIER=Stack /STK=9 /UG=Mm.133988 /UG_TITLE=ESTs
1419504_at	62	255	4.11	Mogat1	Monoacylglycerol O-acyltransferase 1						gb:NM_026713.1 /DB_XREF=gi:18426804 /GEN=Dgat2l1 /FEA=FLmRNA /CNT=26 /TID=Mm.41325.1 /TIER=FL+Stack /STK=9 /UG=Mm.41325 /LL=68393 /DEF=Mus musculus diacylglycerol O-acyltransferase 2-like 1 (Dgat2l1), mRNA. /PROD=diacylglycerol O-acyltransferase 2-like 1 /FL=gb:AF384162.1 gb:NM_026713.1
1417859_at	219	895	4.09	Gas7	Growth arrest specific 7						gb:NM_008088.1 /DB_XREF=gi:6679944 /GEN=Gas7 /FEA=FLmRNA /CNT=45 /TID=Mm.3257.1 /TIER=FL+Stack /STK=35 /UG=Mm.3257 /LL=14457 /DEF=Mus musculus growth arrest specific 7 (Gas7), mRNA. /PROD=growth arrest specific 7 /FL=gb:NM_008088.1 gb:U19860.1
1457693_a_at	70	284	4.06	6430537H07Rik	RIKEN cDNA 6430537H07 gene						gb:AV343405 /DB_XREF=gi:16396996 /DB_XREF=AV343405 /CLONE=6430537H07 /FEA=EST /CNT=13 /TID=Mm.103154.1 /TIER=ConsEnd /STK=3 /UG=Mm.103154 /UG_TITLE=ESTs, Weakly similar to C35E7.9.p (Caenorhabditis elegans) (C.elegans)
1434504_at	234	948	4.05	Zfyve28	Zinc finger, FYVE domain containing 28	1443669_at					gb:BB132074 /DB_XREF=gi:16266442 /DB_XREF=BB132074 /CLONE=9630058O20 /FEA=EST /CNT=32 /TID=Mm.45051.1 /TIER=Stack /STK=31 /UG=Mm.45051 /UG_TITLE=ESTs, Weakly similar to R160.7.p (Caenorhabditis elegans) (C.elegans)
1425107_a_at	58	232	4	Lifr	Leukemia inhibitory factor receptor						gb:D17444.1 /DB_XREF=gi:441493 /FEA=FLmRNA /CNT=14 /TID=Mm.3174.2 /TIER=FL /STK=6 /UG=Mm.3174 /LL=16880 /UG_GENE=Lifr /DEF=Mouse mRNA for soluble D-factorLIF receptor, complete cds. /PROD=soluble D-factorLIF receptor /FL=gb:D17444.1
1422090_a_at	186	732	3.94	Pfkfb2	6-phosphofructo-2-kinase/fructose-2,6-biphosphatase 2	1422091_at	1429486_at	1431901_a_at			gb:NM_008825.1 /DB_XREF=gi:6679284 /GEN=Pfkfb2 /FEA=FLmRNA /CNT=10 /TID=Mm.4255.1 /TIER=FL /STK=1 /UG=Mm.4255 /LL=18640 /DEF=Mus musculus 6-phosphofructo-2-kinasefructose-2,6-biphosphatase 2 (Pfkfb2), mRNA. /PROD=6-phosphofructo-2-kinasefructose-2,6-biphosphatase 2 /FL=gb:NM_008825.1 gb:BC018418.1
1455760_at	136	536	3.94	Slc9a5	Solute carrier family 9 (sodium/hydrogen exchanger), member 5						gb:BB749107 /DB_XREF=gi:16153343 /DB_XREF=BB749107 /CLONE=G030102M01 /FEA=EST /CNT=11 /TID=Mm.51107.1 /TIER=Stack /STK=8 /UG=Mm.51107 /UG_TITLE=ESTs, Highly similar to NAH5 RAT SODIUMHYDROGEN EXCHANGER 5 (R.norvegicus)
1423861_at	134	516	3.85	Plekhf2	Pleckstrin homology domain containing, family F (with FYVE domain) member 2	1423862_at					gb:BC016134.1 /DB_XREF=gi:16359357 /FEA=FLmRNA /CNT=159 /TID=Mm.34351.1 /TIER=FL+Stack /STK=89 /UG=Mm.34351 /DEF=Mus musculus, Similar to hypothetical protein FLJ13187, clone MGC:28979 IMAGE:4503757, mRNA, complete cds. /PROD=Similar to hypothetical protein FLJ13187 /FL=gb:BC016134.1
1423852_at	143	546	3.82	Tmem46	Transmembrane protein 46	1423851_a_at					gb:BC024118.1 /DB_XREF=gi:18848276 /FEA=FLmRNA /CNT=126 /TID=Mm.218843.1 /TIER=FL+Stack /STK=90 /UG=Mm.218843 /DEF=Mus musculus, similar to Unknown (protein for IMAGE:4477067), clone MGC:37759 IMAGE:5068886, mRNA, complete cds. /PROD=similar to Unknown (protein for IMAGE:4477067) /FL=gb:BC024118.1
1416868_at	207	789	3.81	Cdkn2c	Cyclin-dependent kinase inhibitor 2C (p18, inhibits CDK4)						gb:BC027026.1 /DB_XREF=gi:20073274 /FEA=FLmRNA /CNT=92 /TID=Mm.1912.1 /TIER=FL+Stack /STK=66 /UG=Mm.1912 /LL=12580 /UG_GENE=Cdkn2c /DEF=Mus musculus, cyclin-dependent kinase inhibitor 2C (p18, inhibits CDK4), clone MGC:36118 IMAGE:5374670, mRNA, complete cds. /PROD=cyclin-dependent kinase inhibitor 2C (p18,inhibits CDK4) /FL=gb:BC027026.1 gb:NM_007671.1 gb:U19596.1
1430633_s_at	132	503	3.81								gb:BG066234 /DB_XREF=gi:12548803 /DB_XREF=H3040E08-3 /CLONE=H3040E08 /FEA=mRNA /CNT=8 /TID=Mm.132844.1 /TIER=ConsEnd /STK=1 /UG=Mm.132844 /LL=77656 /UG_GENE=C430045I18Rik /UG_TITLE=RIKEN cDNA C430045I18 gene
1448393_at	54	203	3.76	Cldn7	Claudin 7						gb:BC008104.1 /DB_XREF=gi:14198076 /FEA=FLmRNA /CNT=183 /TID=Mm.42189.1 /TIER=FL+Stack /STK=79 /UG=Mm.42189 /LL=53624 /UG_GENE=Cldn7 /DEF=Mus musculus, claudin 7, clone MGC:7108 IMAGE:3157774, mRNA, complete cds. /PROD=claudin 7 /FL=gb:BC008104.1 gb:NM_016887.1 gb:AF087825.1
1423981_x_at	127	468	3.69	Slc25a29	Solute carrier family 25 (mitochondrial carrier, palmitoylcarnitine transporter), member 29						gb:BC006711.1 /DB_XREF=gi:13879464 /FEA=FLmRNA /CNT=90 /TID=Mm.44777.1 /TIER=FL+Stack /STK=70 /UG=Mm.44777 /DEF=Mus musculus, Similar to CG4995 gene product, clone MGC:7958 IMAGE:3584570, mRNA, complete cds. /PROD=Similar to CG4995 gene product /FL=gb:BC006711.1
1444502_at	73	269	3.68	Pet112l	PET112-like (yeast)						gb:BG068580 /DB_XREF=gi:12551149 /DB_XREF=H3067B01-3 /CLONE=H3067B01 /FEA=EST /CNT=4 /TID=Mm.43991.1 /TIER=ConsEnd /STK=2 /UG=Mm.43991 /UG_TITLE=ESTs
1427743_at	63	230	3.65	Gm672	Gene model 672, (NCBI)	1436047_at					gb:AF061179.1 /DB_XREF=gi:3108340 /FEA=mRNA /CNT=1 /TID=Mm.160475.1 /TIER=ConsEnd /STK=0 /UG=Mm.160475 /UG_TITLE=Mus musculus NF-IL6 3UTR-specific binding protein (Nbf) mRNA, partial sequence /DEF=Mus musculus NF-IL6 3UTR-specific binding protein (Nbf) mRNA, partial sequence.
1459442_at	72	262	3.64	Gnb1	Guanine nucleotide binding protein, beta 1						gb:BB125181 /DB_XREF=gi:15408196 /DB_XREF=BB125181 /CLONE=9630003K18 /FEA=EST /CNT=2 /TID=Mm.212278.1 /TIER=ConsEnd /STK=2 /UG=Mm.212278 /UG_TITLE=ESTs
1420518_a_at	258	936	3.63	Igsf9	Immunoglobulin superfamily, member 9						gb:AF317839.1 /DB_XREF=gi:17224903 /GEN=Igsf9 /FEA=FLmRNA /CNT=37 /TID=Mm.214530.1 /TIER=FL /STK=4 /UG=Mm.214530 /LL=93842 /DEF=Mus musculus immunoglobulin superfamily member 9 (Igsf9) mRNA, complete cds. /PROD=immunoglobulin superfamily member 9 /FL=gb:AF317839.1 gb:NM_033608.1
1460294_at	179	646	3.61	Atp8a2	ATPase, aminophospholipid transporter-like, class I, type 8A, member 2	1440627_at					gb:NM_015803.1 /DB_XREF=gi:7656911 /GEN=Atp8a2 /FEA=FLmRNA /CNT=17 /TID=Mm.27564.1 /TIER=FL /STK=2 /UG=Mm.27564 /LL=50769 /DEF=Mus musculus ATPase, aminophospholipid transporter-like, class I, type 8A, member 2 (Atp8a2), mRNA. /PROD=ATPase, class 1, member a /FL=gb:NM_015803.1 gb:AF156550.1
1457145_at	108	380	3.52	Plekhg4	Pleckstrin homology domain containing, family G (with RhoGef domain) member 4						gb:AV271771 /DB_XREF=gi:15405488 /DB_XREF=AV271771 /CLONE=4931414L13 /FEA=EST /CNT=8 /TID=Mm.32034.1 /TIER=ConsEnd /STK=5 /UG=Mm.32034 /LL=102075 /UG_GENE=AI448583 /UG_TITLE=expressed sequence AI448583
1424530_at	246	860	3.5	Sec14l2	SEC14-like 2 (S. cerevisiae)						gb:BC005759.1 /DB_XREF=gi:13543183 /FEA=FLmRNA /CNT=81 /TID=Mm.28994.1 /TIER=FL+Stack /STK=26 /UG=Mm.28994 /DEF=Mus musculus, clone MGC:6302 IMAGE:2655022, mRNA, complete cds. /PROD=Unknown (protein for MGC:6302) /FL=gb:BC005759.1
1443233_at	143	491	3.43	Gtf2f2	General transcription factor IIF, polypeptide 2						gb:BB042748 /DB_XREF=gi:16258747 /DB_XREF=BB042748 /CLONE=6030465L19 /FEA=EST /CNT=3 /TID=Mm.207403.1 /TIER=ConsEnd /STK=3 /UG=Mm.207403 /UG_TITLE=ESTs
1442249_at	79	266	3.37		Transcribed locus						gb:BB283887 /DB_XREF=gi:16401406 /DB_XREF=BB283887 /CLONE=A930103L05 /FEA=EST /CNT=5 /TID=Mm.134465.1 /TIER=ConsEnd /STK=3 /UG=Mm.134465 /UG_TITLE=ESTs
1432006_at	107	351	3.28			1452490_a_at	1455482_at	1435869_s_at	1432007_s_at		gb:AK009735.1 /DB_XREF=gi:12844711 /FEA=mRNA /CNT=1 /TID=Mm.14555.3 /TIER=ConsEnd /STK=0 /UG=Mm.14555 /LL=11772 /UG_GENE=Ap2a2 /UG_TITLE=adaptor protein complex AP-2, alpha 2 subunit /DEF=Mus musculus adult male tongue cDNA, RIKEN full-length enriched library, clone:2310041F10:adaptor protein complex AP-2, alpha 2 subunit, full insert sequence.
1424817_at	136	444	3.26	Cenpb	Centromere autoantigen B						gb:BC006046.1 /DB_XREF=gi:13543797 /FEA=FLmRNA /CNT=34 /TID=Mm.7086.1 /TIER=FL+Stack /STK=15 /UG=Mm.7086 /LL=70997 /UG_GENE=4931426K16Rik /DEF=Mus musculus, RIKEN cDNA 4931426K16 gene, clone MGC:8192 IMAGE:3590641, mRNA, complete cds. /PROD=RIKEN cDNA 4931426K16 gene /FL=gb:BC006046.1
1428705_at	65	212	3.26	1700007K13Rik	RIKEN cDNA 1700007K13 gene						gb:AK005731.1 /DB_XREF=gi:12838458 /FEA=mRNA /CNT=30 /TID=Mm.46470.1 /TIER=Stack /STK=25 /UG=Mm.46470 /LL=69327 /UG_GENE=1700007K13Rik /UG_TITLE=RIKEN cDNA 1700007K13 gene /DEF=Mus musculus adult male testis cDNA, RIKEN full-length enriched library, clone:1700007K13:hypothetical protein, full insert sequence.
1424879_at	122	374	3.07	Lrch4	Leucine-rich repeats and calponin homology (CH) domain containing 4						gb:BB763566 /DB_XREF=gi:16208193 /DB_XREF=BB763566 /CLONE=G370028G06 /FEA=FLmRNA /CNT=141 /TID=Mm.200763.1 /TIER=Stack /STK=22 /UG=Mm.200763 /LL=69943 /UG_GENE=2810008P14Rik /UG_TITLE=RIKEN cDNA 2810008P14 gene /FL=gb:BC012525.1
1447818_x_at	208	637	3.06	Rhebl1	Ras homolog enriched in brain like 1	1451516_at					gb:AV271831 /DB_XREF=gi:6259868 /DB_XREF=AV271831 /CLONE=4931415I06 /FEA=EST /CNT=2 /TID=Mm.68190.1 /TIER=ConsEnd /STK=2 /UG=Mm.68190 /UG_TITLE=ESTs
1425123_at	196	597	3.05	BC025816	CDNA sequence BC025816						gb:BC025816.1 /DB_XREF=gi:19388012 /FEA=FLmRNA /CNT=22 /TID=Mm.86446.1 /TIER=FL /STK=6 /UG=Mm.86446 /DEF=Mus musculus, Similar to chromosome 16 open reading frame 44, clone MGC:37805 IMAGE:5098064, mRNA, complete cds. /PROD=Similar to chromosome 16 open reading frame 44 /FL=gb:BC025816.1
1449005_at	200	606	3.03	Slc16a3	Solute carrier family 16 (monocarboxylic acid transporters), member 3						gb:NM_030696.1 /DB_XREF=gi:13507629 /GEN=MCT4 /FEA=FLmRNA /CNT=72 /TID=Mm.28632.1 /TIER=FL+Stack /STK=27 /UG=Mm.28632 /LL=80879 /DEF=Mus musculus monocarboxylate transporter 4 (MCT4), mRNA. /PROD=monocarboxylate transporter 4 /FL=gb:AF178954.1 gb:NM_030696.1
1431204_at	161	482	2.99								gb:AI451448 /DB_XREF=gi:4304069 /DB_XREF=mu40c11.x1 /CLONE=IMAGE:641876 /FEA=mRNA /CNT=12 /TID=Mm.34433.1 /TIER=ConsEnd /STK=0 /UG=Mm.34433 /LL=75850 /UG_GENE=4930578N16Rik /UG_TITLE=RIKEN cDNA 4930578N16 gene
1435064_a_at	152	455	2.99	Tmem27	Transmembrane protein 27						gb:AI314694 /DB_XREF=gi:4029961 /DB_XREF=uj27f01.x1 /CLONE=IMAGE:1921177 /FEA=EST /CNT=21 /TID=Mm.143766.2 /TIER=Stack /STK=21 /UG=Mm.143766 /LL=57394 /UG_GENE=Nx17-pending /UG_TITLE=kidney-specific membrane protein
1428987_at	143	428	2.99	Dynlrb2	Dynein light chain roadblock-type 2						gb:AK005789.1 /DB_XREF=gi:12838545 /FEA=mRNA /CNT=18 /TID=Mm.23114.1 /TIER=Stack /STK=15 /UG=Mm.23114 /LL=75465 /UG_GENE=1700009A04Rik /UG_TITLE=RIKEN cDNA 1700009A04 gene /DEF=Mus musculus adult male testis cDNA, RIKEN full-length enriched library, clone:1700009A04:homolog to BITHORAXOID-LIKE PROTEIN (HSPC162) (DYNEIN-ASSOCIATED PROTEIN HKM23) (HSPC162 PROTEIN), full insert sequence.
1435541_at	88	263	2.99	Btc	Betacellulin, epidermal growth factor family member						gb:AV231340 /DB_XREF=gi:15404981 /DB_XREF=AV231340 /CLONE=4632406E22 /FEA=EST /CNT=29 /TID=Mm.2024.2 /TIER=Stack /STK=15 /UG=Mm.2024 /LL=12223 /UG_GENE=Btc /UG_TITLE=betacellulin, epidermal growth factor family member
1458544_at	160	470	2.94	BC059841	CDNA sequence BC059841						gb:BB625106 /DB_XREF=gi:16463441 /DB_XREF=BB625106 /CLONE=9130007L17 /FEA=EST /CNT=5 /TID=Mm.23240.1 /TIER=ConsEnd /STK=2 /UG=Mm.23240 /UG_TITLE=ESTs
1448257_at	201	588	2.93	Slc29a2	Solute carrier family 29 (nucleoside transporters), member 2						gb:NM_007854.1 /DB_XREF=gi:6678012 /GEN=Slc29a2 /FEA=FLmRNA /CNT=129 /TID=Mm.4930.1 /TIER=FL+Stack /STK=112 /UG=Mm.4930 /LL=13340 /DEF=Mus musculus solute carrier family 29 (nucleoside transporters), member 2 (Slc29a2), mRNA. /PROD=solute carrier family 29 (nucleosidetransporters), member 2 /FL=gb:AF183397.1 gb:NM_007854.1
1433209_at	124	360	2.9	Ppp1r9a	Protein phosphatase 1, regulatory (inhibitor) subunit 9A						gb:AK008743.1 /DB_XREF=gi:12843127 /FEA=mRNA /CNT=1 /TID=Mm.158366.1 /TIER=ConsEnd /STK=0 /UG=Mm.158366 /LL=70386 /UG_GENE=2210017G18Rik /UG_TITLE=RIKEN cDNA 2210017G18 gene /DEF=Mus musculus adult male stomach cDNA, RIKEN full-length enriched library, clone:2210017G18:unclassifiable transcript, full insert sequence.
1458135_at	179	518	2.89	G630014P10Rik	RIKEN cDNA G630014P10 gene						gb:BB265352 /DB_XREF=gi:16400275 /DB_XREF=BB265352 /CLONE=A830020C21 /FEA=EST /CNT=3 /TID=Mm.215689.1 /TIER=ConsEnd /STK=3 /UG=Mm.215689 /UG_TITLE=ESTs
1426389_at	311	897	2.88	Camk1d	Calcium/calmodulin-dependent protein kinase ID	1438643_at	1452050_at				gb:BB818719 /DB_XREF=gi:16991348 /DB_XREF=BB818719 /CLONE=G730046C05 /FEA=FLmRNA /CNT=101 /TID=Mm.26888.1 /TIER=Stack /STK=12 /UG=Mm.26888 /UG_TITLE=Mus musculus, Similar to hypothetical gene supported by AF086316, clone MGC:32485 IMAGE:5052777, mRNA, complete cds /FL=gb:BC025011.2
1435302_at	122	347	2.84	Taf4b	TAF4B RNA polymerase II, TATA box binding protein (TBP)-associated factor	1435303_at					gb:AV277229 /DB_XREF=gi:16390939 /DB_XREF=AV277229 /CLONE=4932441F06 /FEA=EST /CNT=38 /TID=Mm.86376.1 /TIER=Stack /STK=18 /UG=Mm.86376 /LL=107058 /UG_GENE=AW987595 /UG_TITLE=expressed sequence AW987595
1448857_a_at	280	791	2.83	Zdhhc12	Zinc finger, DHHC domain containing 12						gb:NM_025428.1 /DB_XREF=gi:13384825 /GEN=1190004A01Rik /FEA=FLmRNA /CNT=45 /TID=Mm.22538.1 /TIER=FL+Stack /STK=35 /UG=Mm.22538 /LL=66220 /DEF=Mus musculus RIKEN cDNA 1190004A01 gene (1190004A01Rik), mRNA. /PROD=RIKEN cDNA 1190004A01 /FL=gb:NM_025428.1
1437313_x_at	239	673	2.82	Hmgb2	High mobility group box 2						gb:C85885 /DB_XREF=gi:2917842 /DB_XREF=C85885 /CLONE=J0216B04 /FEA=EST /CNT=24 /TID=Mm.1693.3 /TIER=Stack /STK=20 /UG=Mm.1693 /LL=15352 /UG_GENE=Hmgb2 /UG_TITLE=high mobility group box 2
1417818_at	331	929	2.81	Wwtr1	WW domain containing transcription regulator 1						gb:BB535786 /DB_XREF=gi:16446589 /DB_XREF=BB535786 /CLONE=E030045N14 /FEA=FLmRNA /CNT=274 /TID=Mm.28060.1 /TIER=Stack /STK=43 /UG=Mm.28060 /LL=97064 /UG_GENE=2310058J06Rik /UG_TITLE=RIKEN cDNA 2310058J06 gene /FL=gb:BC014727.1 gb:BC004640.1 gb:NM_133784.1
1427195_at	352	976	2.77		Mus musculus, clone IMAGE:3983419, mRNA						gb:W91587 /DB_XREF=gi:1407860 /DB_XREF=MTA.C08.092.A /CLONE=MTA.C08.092 /FEA=mRNA /CNT=20 /TID=Mm.100628.1 /TIER=Stack /STK=10 /UG=Mm.100628 /UG_TITLE=Mus musculus, clone IMAGE:3983419, mRNA
1439859_at	333	922	2.77	9630033F20Rik	RIKEN cDNA 9630033F20 gene						gb:BB278948 /DB_XREF=gi:15411022 /DB_XREF=BB278948 /CLONE=A930014G16 /FEA=EST /CNT=9 /TID=Mm.41839.1 /TIER=ConsEnd /STK=6 /UG=Mm.41839 /LL=101134 /UG_GENE=AI595337 /UG_TITLE=expressed sequence AI595337
1440883_at	316	873	2.76		Transcribed locus	1445161_at	1455580_at				gb:BM125576 /DB_XREF=gi:17120128 /DB_XREF=id75h12.x1 /CLONE=IMAGE:5669231 /FEA=EST /CNT=12 /TID=Mm.86484.1 /TIER=ConsEnd /STK=4 /UG=Mm.86484 /UG_TITLE=ESTs
1422979_at	155	426	2.75	Suv39h2	Suppressor of variegation 3-9 homolog 2 (Drosophila)	1433996_at					gb:NM_022724.1 /DB_XREF=gi:12229222 /GEN=Suv39h2 /FEA=FLmRNA /CNT=16 /TID=Mm.155683.1 /TIER=FL /STK=0 /UG=Mm.155683 /LL=64707 /DEF=Mus musculus suppressor of variegation 3-9 homolog 2 (Drosophila) (Suv39h2), mRNA. /PROD=suppressor of variegation 3-9 homologue 2(Drosophila) /FL=gb:NM_022724.1 gb:AF149205.1
1415936_at	231	630	2.73	Bcar3	Breast cancer anti-estrogen resistance 3						gb:NM_013867.1 /DB_XREF=gi:7304924 /GEN=Bcar3 /FEA=FLmRNA /CNT=187 /TID=Mm.45815.1 /TIER=FL+Stack /STK=165 /UG=Mm.45815 /LL=29815 /DEF=Mus musculus breast cancer anti-estrogen resistance 3 (Bcar3), mRNA. /PROD=breast cancer anti-estrogen resistance 3 /FL=gb:AF179566.1 gb:NM_013867.1
1439634_at	204	557	2.73	4930505D03Rik	RIKEN cDNA 4930505D03 gene						gb:AW490446 /DB_XREF=gi:7060717 /DB_XREF=UI-M-BH3-ass-b-06-0-UI.s1 /CLONE=UI-M-BH3-ass-b-06-0-UI /FEA=EST /CNT=12 /TID=Mm.153928.1 /TIER=ConsEnd /STK=7 /UG=Mm.153928 /UG_TITLE=ESTs
1420725_at	200	545	2.73			1420726_x_at					gb:NM_138758.1 /DB_XREF=gi:20270296 /GEN=Tmlh /FEA=FLmRNA /CNT=8 /TID=Mm.139078.1 /TIER=FL /STK=3 /UG=Mm.139078 /LL=192289 /DEF=Mus musculus epsilon-trimethyllysine 2-oxoglutarate dioxygenase (Tmlh), mRNA. /PROD=epsilon-trimethyllysine 2-oxoglutaratedioxygenase /FL=gb:NM_138758.1 gb:AY033513.1 gb:BC010495.1
1431422_a_at	322	865	2.69	Dusp14	Dual specificity phosphatase 14						gb:AK009744.1 /DB_XREF=gi:12844725 /GEN=Dusp14 /FEA=mRNA /CNT=3 /TID=Mm.142293.2 /TIER=ConsEnd /STK=0 /UG=Mm.142293 /LL=56405 /UG_TITLE=dual specificity phosphatase 14 /DEF=Mus musculus adult male tongue cDNA, RIKEN full-length enriched library, clone:2310042C07:dual specificity phosphatase 14, full insert sequence.
1445359_at	175	468	2.67	Adcy1	Adenylate cyclase 1	1456487_at					gb:BE993830 /DB_XREF=gi:10676444 /DB_XREF=UI-M-BZ1-bjh-e-07-0-UI.s1 /CLONE=UI-M-BZ1-bjh-e-07-0-UI /FEA=EST /CNT=3 /TID=Mm.152322.1 /TIER=ConsEnd /STK=2 /UG=Mm.152322 /UG_TITLE=ESTs
1452534_a_at	348	923	2.65	Hmgb2	High mobility group box 2						gb:X67668.1 /DB_XREF=gi:51338 /GEN=hmg2 /FEA=mRNA /CNT=1 /TID=Mm.1693.2 /TIER=ConsEnd /STK=0 /UG=Mm.1693 /LL=15352 /DEF=M.musculus mRNA for high mobility group 2 protein. /PROD=high mobility group 2 protein
1434719_at	170	444	2.61	A2m	Alpha-2-macroglobulin						gb:BB185854 /DB_XREF=gi:15409465 /DB_XREF=BB185854 /CLONE=A330029I17 /FEA=EST /CNT=32 /TID=Mm.30151.1 /TIER=Stack /STK=26 /UG=Mm.30151 /UG_TITLE=ESTs, Moderately similar to A2M2 MOUSE MURINOGLOBULIN 2 PRECURSOR (M.musculus)
1435037_at	201	522	2.6	Perld1	Per1-like domain containing 1						gb:AV378754 /DB_XREF=gi:16398193 /DB_XREF=AV378754 /CLONE=9130429K19 /FEA=EST /CNT=25 /TID=Mm.86519.1 /TIER=Stack /STK=21 /UG=Mm.86519 /UG_TITLE=ESTs, Weakly similar to R01B10.4.p (Caenorhabditis elegans) (C.elegans)
1429663_at	127	329	2.59	3110023G01Rik	RIKEN cDNA 3110023G01 gene						gb:AK014074.1 /DB_XREF=gi:12851719 /FEA=mRNA /CNT=15 /TID=Mm.35803.1 /TIER=Stack /STK=11 /UG=Mm.35803 /LL=71206 /UG_GENE=4933439B08Rik /UG_TITLE=RIKEN cDNA 4933439B08 gene /DEF=Mus musculus 13 days embryo head cDNA, RIKEN full-length enriched library, clone:3110023G01:related to PUTATIVE MICROTUBULE SEVERING PROTEIN KATANIN P60 SUBUNIT, full insert sequence.
1445268_at	85	219	2.58		Transcribed locus, weakly similar to NP_059506.1 coatomer protein complex, subunit gamma 2 [Mus musculus]						gb:AW550459 /DB_XREF=gi:7195887 /DB_XREF=L0064H09-3 /CLONE=L0064H09 /FEA=EST /CNT=3 /TID=Mm.102927.1 /TIER=ConsEnd /STK=2 /UG=Mm.102927 /UG_TITLE=ESTs, Moderately similar to COPG_HUMAN COATOMER GAMMA SUBUNIT (GAMMA-COAT PROTEIN) (GAMMA-COP) (H.sapiens)
1437753_at	151	388	2.57	AW742931	Expressed sequence AW742931						gb:BE987651 /DB_XREF=gi:10663221 /DB_XREF=UI-M-CG0p-bhr-a-10-0-UI.s1 /CLONE=UI-M-CG0p-bhr-a-10-0-UI /FEA=EST /CNT=22 /TID=Mm.65395.1 /TIER=Stack /STK=14 /UG=Mm.65395 /UG_TITLE=ESTs
1457275_at	162	414	2.56	Dmn	Desmuslin						gb:AI594683 /DB_XREF=gi:4603731 /DB_XREF=vt55h01.x1 /CLONE=IMAGE:1167025 /FEA=EST /CNT=10 /TID=Mm.83561.1 /TIER=ConsEnd /STK=4 /UG=Mm.83561 /UG_TITLE=ESTs
1453768_a_at	103	264	2.56	5430432M24Rik	RIKEN cDNA 5430432M24 gene						gb:AK005776.1 /DB_XREF=gi:12838526 /FEA=mRNA /CNT=9 /TID=Mm.18228.2 /TIER=ConsEnd /STK=0 /UG=Mm.18228 /LL=73847 /UG_GENE=5430432M24Rik /UG_TITLE=RIKEN cDNA 5430432M24 gene /DEF=Mus musculus adult male testis cDNA, RIKEN full-length enriched library, clone:1700008J10:hypothetical protein, full insert sequence.
1425505_at	375	954	2.54	Mylk	Myosin, light polypeptide kinase						gb:AI746549 /DB_XREF=gi:5124813 /DB_XREF=ul08d10.x1 /CLONE=IMAGE:2076211 /FEA=FLmRNA /CNT=74 /TID=Mm.27680.1 /TIER=Stack /STK=28 /UG=Mm.27680 /UG_TITLE=Mus musculus telokin mRNA, complete cds /FL=gb:AF314149.1
1440981_at	137	345	2.52	Pak7	P21 (CDKN1A)-activated kinase 7	1455847_at					gb:BB266045 /DB_XREF=gi:16400324 /DB_XREF=BB266045 /CLONE=A830023E23 /FEA=EST /CNT=8 /TID=Mm.131572.1 /TIER=ConsEnd /STK=4 /UG=Mm.131572 /UG_TITLE=ESTs, Weakly similar to SERINETHREONINE-PROTEIN KINASE PAK-BETA (M.musculus)
1431299_a_at	288	719	2.5	2310014H01Rik	RIKEN cDNA 2310014H01 gene						gb:AK009340.1 /DB_XREF=gi:12844078 /FEA=mRNA /CNT=5 /TID=Mm.22525.2 /TIER=ConsEnd /STK=0 /UG=Mm.22525 /LL=76448 /UG_GENE=2310014H01Rik /UG_TITLE=RIKEN cDNA 2310014H01 gene /DEF=Mus musculus adult male tongue cDNA, RIKEN full-length enriched library, clone:2310014H01:unclassifiable transcript, full insert sequence.
1443882_at	274	681	2.49	Slc26a2	Solute carrier family 26 (sulfate transporter), member 2						gb:BI150812 /DB_XREF=gi:14610813 /DB_XREF=602914710F1 /CLONE=IMAGE:5065274 /FEA=EST /CNT=13 /TID=Mm.215863.1 /TIER=ConsEnd /STK=2 /UG=Mm.215863 /UG_TITLE=ESTs, Weakly similar to TYROSINE-PROTEIN KINASE JAK3 (M.musculus)
1434680_at	119	295	2.48	Plekhg3	Pleckstrin homology domain containing, family G (with RhoGef domain) member 3						gb:BM208085 /DB_XREF=gi:17764166 /DB_XREF=C0622C02-3 /CLONE=C0622C02 /FEA=EST /CNT=45 /TID=Mm.123628.1 /TIER=Stack /STK=27 /UG=Mm.123628 /UG_TITLE=ESTs, Weakly similar to T00267 hypothetical protein KIAA0599 (H.sapiens)
1418195_at	394	974	2.47	Galnt10	UDP-N-acetyl-alpha-D-galactosamine:polypeptide N-acetylgalactosaminyltransferase 10						gb:BG965198 /DB_XREF=gi:14352835 /DB_XREF=602830944F1 /CLONE=IMAGE:4985531 /FEA=FLmRNA /CNT=101 /TID=Mm.11360.1 /TIER=Stack /STK=22 /UG=Mm.11360 /LL=171212 /UG_GENE=Galnt9 /UG_TITLE=UDP-N-acetyl-alpha-D-galactosamine:polypeptide N-acetylgalactosaminyltransferase 9 /FL=gb:NM_134189.1 gb:BC016585.1
1442680_at	177	430	2.43	Ncam1	Neural cell adhesion molecule 1						gb:AW548716 /DB_XREF=gi:7194139 /DB_XREF=L0040E11-3 /CLONE=L0040E11 /FEA=EST /CNT=4 /TID=Mm.156925.1 /TIER=ConsEnd /STK=3 /UG=Mm.156925 /UG_TITLE=ESTs
1443306_at	395	953	2.41		0 day neonate cerebellum cDNA, RIKEN full-length enriched library, clone:C230004E12 product:hypothetical protein, full insert sequence						gb:BB380163 /DB_XREF=gi:16407890 /DB_XREF=BB380163 /CLONE=C230004E12 /FEA=EST /CNT=3 /TID=Mm.80674.1 /TIER=ConsEnd /STK=3 /UG=Mm.80674 /UG_TITLE=ESTs
1455935_at	306	738	2.41	2410131K14Rik	RIKEN cDNA 2410131K14 gene						gb:BQ175466 /DB_XREF=gi:20350958 /DB_XREF=UI-M-DJ2-bwc-n-14-0-UI.s1 /CLONE=UI-M-DJ2-bwc-n-14-0-UI /FEA=EST /CNT=26 /TID=Mm.103428.2 /TIER=Stack /STK=24 /UG=Mm.103428 /LL=76792 /UG_GENE=2410131K14Rik /UG_TITLE=RIKEN cDNA 2410131K14 gene
1424633_at	255	614	2.41	Camk1g	Calcium/calmodulin-dependent protein kinase I gamma						gb:AF428262.1 /DB_XREF=gi:16755793 /GEN=Camk1g /FEA=FLmRNA /CNT=31 /TID=Mm.40329.1 /TIER=FL+Stack /STK=22 /UG=Mm.40329 /DEF=Mus musculus calciumcalmodulin-dependent protein kinase I gamma (Camk1g) mRNA, complete cds. /PROD=calciumcalmodulin-dependent protein kinase Igamma /FL=gb:AF428262.1 gb:BC021840.1
1416199_at	134	322	2.4	Kifc3	Kinesin family member C3						gb:NM_010631.1 /DB_XREF=gi:12597626 /GEN=Kifc3 /FEA=FLmRNA /CNT=157 /TID=Mm.22513.1 /TIER=FL+Stack /STK=114 /UG=Mm.22513 /LL=16582 /DEF=Mus musculus kinesin family member C3 (Kifc3), mRNA. /PROD=kinesin family member C3 /FL=gb:AF013118.2 gb:NM_010631.1
1445024_at	139	332	2.39	Stard7	START domain containing 7	1449628_s_at					gb:BI871989 /DB_XREF=gi:16045664 /DB_XREF=603396771F1 /CLONE=IMAGE:5400760 /FEA=EST /CNT=3 /TID=Mm.134208.1 /TIER=ConsEnd /STK=2 /UG=Mm.134208 /UG_TITLE=ESTs
1419140_at	417	992	2.38	Acvr2b	Activin receptor IIB						gb:NM_007397.1 /DB_XREF=gi:6680633 /GEN=Acvr2b /FEA=FLmRNA /CNT=19 /TID=Mm.8940.1 /TIER=FL+Stack /STK=13 /UG=Mm.8940 /LL=11481 /DEF=Mus musculus activin receptor IIB (Acvr2b), mRNA. /PROD=activin receptor IIB /FL=gb:M84120.1 gb:NM_007397.1
1449493_at	176	417	2.37	Insl5	Insulin-like 5						gb:NM_011831.1 /DB_XREF=gi:6754357 /GEN=Insl5 /FEA=FLmRNA /CNT=18 /TID=Mm.100163.1 /TIER=FL+Stack /STK=9 /UG=Mm.100163 /LL=23919 /DEF=Mus musculus insulin-like 5 (Insl5), mRNA. /PROD=insulin-like 5 /FL=gb:AF076971.1 gb:AF133817.1 gb:AF054843.1 gb:AF054842.1 gb:NM_011831.1 gb:BC010968.1
1447275_at	385	907	2.36	Fgf2	Fibroblast growth factor 2						gb:AI449447 /DB_XREF=gi:4290067 /DB_XREF=mp94d02.x1 /CLONE=IMAGE:576867 /FEA=EST /CNT=2 /TID=Mm.32171.1 /TIER=ConsEnd /STK=2 /UG=Mm.32171 /UG_TITLE=ESTs
1424395_at	241	569	2.36	Asrgl1	Asparaginase like 1						gb:BC016106.1 /DB_XREF=gi:16359291 /FEA=FLmRNA /CNT=124 /TID=Mm.20246.1 /TIER=FL+Stack /STK=34 /UG=Mm.20246 /LL=66514 /UG_GENE=2410004D18Rik /DEF=Mus musculus, Similar to hypothetical protein FLJ22316, clone MGC:27691 IMAGE:4921265, mRNA, complete cds. /PROD=Similar to hypothetical protein FLJ22316 /FL=gb:BC016106.1
1445709_at	202	475	2.35	Mdm1	Transformed mouse 3T3 cell double minute 1	1451053_a_at					gb:AI323780 /DB_XREF=gi:4058209 /DB_XREF=mm39e03.x1 /CLONE=IMAGE:523900 /FEA=EST /CNT=3 /TID=Mm.101191.1 /TIER=ConsEnd /STK=2 /UG=Mm.101191 /UG_TITLE=ESTs
1443960_at	378	880	2.33								gb:BQ175377 /DB_XREF=gi:20350869 /DB_XREF=UI-M-DJ2-bwc-n-01-0-UI.s1 /CLONE=UI-M-DJ2-bwc-n-01-0-UI /FEA=EST /CNT=7 /TID=Mm.39467.1 /TIER=ConsEnd /STK=2 /UG=Mm.39467 /UG_TITLE=ESTs
1424265_at	229	533	2.33	Npl	N-acetylneuraminate pyruvate lyase						gb:BC022734.1 /DB_XREF=gi:18490966 /FEA=FLmRNA /CNT=65 /TID=Mm.24887.1 /TIER=FL+Stack /STK=42 /UG=Mm.24887 /LL=74091 /UG_GENE=Npl-pending /DEF=Mus musculus, RIKEN cDNA 0610033B02 gene, clone MGC:31604 IMAGE:4506776, mRNA, complete cds. /PROD=RIKEN cDNA 0610033B02 gene /FL=gb:BC022734.1
1446726_at	125	290	2.32								gb:BE980072 /DB_XREF=gi:10647668 /DB_XREF=UI-M-CG0-bcs-a-11-0-UI.s1 /CLONE=UI-M-CG0-bcs-a-11-0-UI /FEA=EST /CNT=2 /TID=Mm.151690.1 /TIER=ConsEnd /STK=2 /UG=Mm.151690 /UG_TITLE=ESTs
1425314_at	416	963	2.31	Mass1	Monogenic, audiogenic seizure susceptibility 1						gb:AF435926.1 /DB_XREF=gi:16904209 /GEN=Vlgr1 /FEA=FLmRNA /CNT=8 /TID=Mm.137091.2 /TIER=FL /STK=3 /UG=Mm.137091 /LL=110789 /DEF=Mus musculus very large G protein-coupled receptor 1 (Vlgr1) mRNA, complete cds. /PROD=very large G protein-coupled receptor 1 /FL=gb:AF435926.1
1438010_at	352	812	2.31	D4Ertd429e	DNA segment, Chr 4, ERATO Doi 429, expressed						gb:BB713558 /DB_XREF=gi:16066727 /DB_XREF=BB713558 /CLONE=B020047N18 /FEA=EST /CNT=83 /TID=Mm.196394.1 /TIER=Stack /STK=12 /UG=Mm.196394 /LL=52277 /UG_GENE=D4Ertd429e /UG_TITLE=DNA segment, Chr 4, ERATO Doi 429, expressed
1436916_at	259	597	2.31	Tmem108	Transmembrane protein 108	1454729_at					gb:BB733119 /DB_XREF=gi:16116394 /DB_XREF=BB733119 /CLONE=E970035E10 /FEA=EST /CNT=38 /TID=Mm.32665.1 /TIER=Stack /STK=36 /UG=Mm.32665 /LL=102529 /UG_GENE=AI462967 /UG_TITLE=expressed sequence AI462967
1424197_s_at	203	465	2.29	Fance	Fanconi anemia, complementation group E	1453689_at					gb:BC016538.1 /DB_XREF=gi:19116231 /FEA=FLmRNA /CNT=61 /TID=Mm.201859.1 /TIER=FL+Stack /STK=46 /UG=Mm.201859 /DEF=Mus musculus, clone MGC:27800 IMAGE:3157853, mRNA, complete cds. /PROD=Unknown (protein for MGC:27800) /FL=gb:BC016538.1
1443874_at	128	292	2.28	2810002I04Rik	RIKEN cDNA 2810002I04 gene						gb:AV345094 /DB_XREF=gi:15406604 /DB_XREF=AV345094 /CLONE=6430549M02 /FEA=EST /CNT=11 /TID=Mm.24237.1 /TIER=ConsEnd /STK=2 /UG=Mm.24237 /LL=104974 /UG_GENE=AV046379 /UG_TITLE=expressed sequence AV046379
1422642_at	192	436	2.27	Cdc42ep3	CDC42 effector protein (Rho GTPase binding) 3	1450700_at					gb:BC021409.1 /DB_XREF=gi:18204087 /FEA=FLmRNA /CNT=95 /TID=Mm.140601.1 /TIER=FL+Stack /STK=22 /UG=Mm.140601 /LL=68025 /UG_GENE=3200001F04Rik /DEF=Mus musculus, RIKEN cDNA 3200001F04 gene, clone MGC:29409 IMAGE:5007192, mRNA, complete cds. /PROD=RIKEN cDNA 3200001F04 gene /FL=gb:NM_026514.1 gb:BC021409.1
1431202_at	299	677	2.26	Herc3	Hect domain and RLD 3	1433590_at					gb:AK017531.1 /DB_XREF=gi:12856816 /FEA=mRNA /CNT=12 /TID=Mm.33788.1 /TIER=ConsEnd /STK=0 /UG=Mm.33788 /LL=73998 /UG_GENE=Herc3 /UG_TITLE=hect domain and RLD 3 /DEF=Mus musculus 8 days embryo whole body cDNA, RIKEN full-length enriched library, clone:5730409F18:Regulator of chromosome condensation (RCC1) containing protein, full insert sequence.
1449281_at	286	646	2.26	Nrtn	Neurturin						gb:NM_008738.1 /DB_XREF=gi:6679135 /GEN=Nrtn /FEA=FLmRNA /CNT=31 /TID=Mm.8074.1 /TIER=FL+Stack /STK=16 /UG=Mm.8074 /LL=18188 /DEF=Mus musculus neurturin (Nrtn), mRNA. /PROD=neurturin /FL=gb:NM_008738.1 gb:U78109.1
1439514_at	274	617	2.25		Transcribed locus						gb:BB277834 /DB_XREF=gi:16401025 /DB_XREF=BB277834 /CLONE=A930007L12 /FEA=EST /CNT=11 /TID=Mm.186131.1 /TIER=ConsEnd /STK=7 /UG=Mm.186131 /UG_TITLE=ESTs
1439797_at	164	367	2.24	Ppard	Peroxisome proliferator activator receptor delta						gb:AW046066 /DB_XREF=gi:5906595 /DB_XREF=UI-M-BH1-akv-e-11-0-UI.s1 /CLONE=UI-M-BH1-akv-e-11-0-UI /FEA=EST /CNT=16 /TID=Mm.41233.1 /TIER=ConsEnd /STK=6 /UG=Mm.41233 /UG_TITLE=ESTs, Weakly similar to A34615 profilaggrin - rat (R.norvegicus)
1440699_at	380	849	2.23	Mtap2	Microtubule-associated protein 2						gb:BB189640 /DB_XREF=gi:15409500 /DB_XREF=BB189640 /CLONE=A330055K22 /FEA=EST /CNT=5 /TID=Mm.121905.1 /TIER=ConsEnd /STK=5 /UG=Mm.121905 /UG_TITLE=ESTs, Highly similar to S68868 microtubule-associated protein 2 - rat (R.norvegicus)
1428751_at	365	811	2.22	Pacrg	Park2 co-regulated						gb:AK005771.1 /DB_XREF=gi:12838517 /FEA=mRNA /CNT=33 /TID=Mm.18889.1 /TIER=Stack /STK=23 /UG=Mm.18889 /LL=69310 /UG_GENE=1700008H23Rik /UG_TITLE=RIKEN cDNA 1700008H23 gene /DEF=Mus musculus adult male testis cDNA, RIKEN full-length enriched library, clone:1700008H23:homolog to DJ495O10.2 (NOVEL PROTEIN SIMILAR TO WORM E04F6.2 (FRAGMENT), full insert sequence.
1425333_at	245	543	2.22	1810048P08Rik	RIKEN cDNA 1810048P08 gene	1430163_at					gb:BB667458 /DB_XREF=gi:16398907 /DB_XREF=BB667458 /CLONE=C730014O14 /FEA=FLmRNA /CNT=90 /TID=Mm.37380.1 /TIER=Stack /STK=44 /UG=Mm.37380 /LL=69834 /UG_GENE=1810048P08Rik /UG_TITLE=RIKEN cDNA 1810048P08 gene /FL=gb:BC010248.1
1458412_at	135	299	2.21	Zfp78	Zinc finger protein 78						gb:BB334511 /DB_XREF=gi:15411571 /DB_XREF=BB334511 /CLONE=B830023C15 /FEA=EST /CNT=7 /TID=Mm.136456.1 /TIER=ConsEnd /STK=2 /UG=Mm.136456 /UG_TITLE=ESTs, Weakly similar to ZINC FINGER PROTEIN ZFP-90 (M.musculus)
1431359_a_at	236	514	2.18	1110007C09Rik	RIKEN cDNA 1110007C09 gene						gb:AK003526.1 /DB_XREF=gi:12834245 /FEA=mRNA /CNT=4 /TID=Mm.3336.1 /TIER=ConsEnd /STK=0 /UG=Mm.3336 /LL=68480 /UG_GENE=1110007C09Rik /UG_TITLE=RIKEN cDNA 1110007C09 gene /DEF=Mus musculus 18 days embryo whole body cDNA, RIKEN full-length enriched library, clone:1110007C09:hypothetical protein, full insert sequence.
1458233_at	258	559	2.17	9030227G01Rik	RIKEN cDNA 9030227G01 gene						gb:BB128216 /DB_XREF=gi:16262412 /DB_XREF=BB128216 /CLONE=9630028K15 /FEA=EST /CNT=3 /TID=Mm.207500.1 /TIER=ConsEnd /STK=3 /UG=Mm.207500 /UG_TITLE=ESTs
1443378_s_at	230	497	2.16								gb:BB012070 /DB_XREF=gi:16257277 /DB_XREF=BB012070 /CLONE=4930407A16 /FEA=EST /CNT=3 /TID=Mm.199024.1 /TIER=ConsEnd /STK=3 /UG=Mm.199024 /LL=100905 /UG_GENE=AW050088 /UG_TITLE=expressed sequence AW050088
1446355_at	108	231	2.14	AW495713	Expressed sequence AW495713						gb:BB256846 /DB_XREF=gi:16399660 /DB_XREF=BB256846 /CLONE=A730075L14 /FEA=EST /CNT=2 /TID=Mm.208353.1 /TIER=ConsEnd /STK=2 /UG=Mm.208353 /UG_TITLE=ESTs
1452978_at	159	333	2.09	Tmem138	Transmembrane protein 138						gb:BB433511 /DB_XREF=gi:16424288 /DB_XREF=BB433511 /CLONE=C820001O03 /FEA=mRNA /CNT=34 /TID=Mm.45429.1 /TIER=Stack /STK=16 /UG=Mm.45429 /LL=72982 /UG_GENE=2900055D14Rik /UG_TITLE=RIKEN cDNA 2900055D14 gene
1440116_at	321	667	2.08	D630045J12Rik	RIKEN cDNA D630045J12 gene	1455419_at					gb:AW558117 /DB_XREF=gi:7203546 /DB_XREF=L0290H03-3 /CLONE=L0290H03 /FEA=EST /CNT=6 /TID=Mm.44397.1 /TIER=ConsEnd /STK=6 /UG=Mm.44397 /UG_TITLE=ESTs
1441479_at	201	418	2.08	Ppm1b	Protein phosphatase 1B, magnesium dependent, beta isoform						gb:BB126042 /DB_XREF=gi:16262243 /DB_XREF=BB126042 /CLONE=9630010N22 /FEA=EST /CNT=4 /TID=Mm.212081.1 /TIER=ConsEnd /STK=4 /UG=Mm.212081 /UG_TITLE=ESTs
1451489_at	146	303	2.08	Slc25a35	Solute carrier family 25, member 35						gb:BC019996.1 /DB_XREF=gi:18044818 /FEA=FLmRNA /CNT=38 /TID=Mm.35781.1 /TIER=FL+Stack /STK=15 /UG=Mm.35781 /LL=71998 /UG_GENE=1810012H11Rik /DEF=Mus musculus, RIKEN cDNA 1810012H11 gene, clone MGC:28559 IMAGE:4207271, mRNA, complete cds. /PROD=RIKEN cDNA 1810012H11 gene /FL=gb:BC019996.1
1454397_at	236	488	2.07	Snrk	SNF related kinase						gb:AK019501.1 /DB_XREF=gi:12859749 /FEA=mRNA /CNT=1 /TID=Mm.160068.1 /TIER=ConsEnd /STK=0 /UG=Mm.160068 /LL=78265 /UG_GENE=4632418H02Rik /UG_TITLE=RIKEN cDNA 4632418H02 gene /DEF=Mus musculus 0 day neonate skin cDNA, RIKEN full-length enriched library, clone:4632418H02:unclassifiable transcript, full insert sequence.
1428585_at	396	814	2.06	Actn1	Actinin, alpha 1						gb:BE853286 /DB_XREF=gi:10311625 /DB_XREF=uw87d05.x1 /CLONE=IMAGE:3468969 /FEA=mRNA /CNT=104 /TID=Mm.23961.1 /TIER=Stack /STK=30 /UG=Mm.23961 /LL=73156 /UG_GENE=3110023F10Rik /UG_TITLE=RIKEN cDNA 3110023F10 gene
1447218_at	253	522	2.06	Iqcd	IQ motif containing D						gb:BG071450 /DB_XREF=gi:12554019 /DB_XREF=H3099B04-3 /CLONE=H3099B04 /FEA=EST /CNT=2 /TID=Mm.174965.1 /TIER=ConsEnd /STK=2 /UG=Mm.174965 /UG_TITLE=ESTs
1458932_at	233	481	2.06	Pex2	Peroxin 2						gb:BB639093 /DB_XREF=gi:16474562 /DB_XREF=BB639093 /CLONE=A630073M21 /FEA=EST /CNT=3 /TID=Mm.124208.1 /TIER=ConsEnd /STK=2 /UG=Mm.124208 /UG_TITLE=ESTs
1426497_at	142	293	2.06	Jarid1c	Jumonji, AT rich interactive domain 1C (Rbp2 like)						gb:AW552575 /DB_XREF=gi:7197998 /DB_XREF=L0214E04-3 /CLONE=L0214E04 /FEA=FLmRNA /CNT=72 /TID=Mm.142655.1 /TIER=Stack /STK=9 /UG=Mm.142655 /LL=20591 /UG_GENE=Smcx /UG_TITLE=selected mouse cDNA on the X /FL=gb:AF127245.1
1452016_at	175	358	2.05	Alox5ap	Arachidonate 5-lipoxygenase activating protein						gb:BC026209.1 /DB_XREF=gi:20073038 /FEA=FLmRNA /CNT=26 /TID=Mm.19844.1 /TIER=FL+Stack /STK=8 /UG=Mm.19844 /LL=11690 /UG_GENE=Alox5ap /DEF=Mus musculus, arachidonate 5-lipoxygenase activating protein, clone MGC:41698 IMAGE:1349819, mRNA, complete cds. /PROD=arachidonate 5-lipoxygenase activating protein /FL=gb:BC026209.1
1443080_at	149	305	2.05	Adcy5	Adenylate cyclase 5						gb:BB151599 /DB_XREF=gi:16267946 /DB_XREF=BB151599 /CLONE=A030014I05 /FEA=EST /CNT=3 /TID=Mm.137926.1 /TIER=ConsEnd /STK=3 /UG=Mm.137926 /UG_TITLE=ESTs
1434793_at	330	674	2.04	Wdr78	WD repeat domain 78						gb:AI851014 /DB_XREF=gi:5494920 /DB_XREF=UI-M-BH0-ajv-c-08-0-UI.s1 /CLONE=UI-M-BH0-ajv-c-08-0-UI /FEA=EST /CNT=36 /TID=Mm.835.1 /TIER=Stack /STK=25 /UG=Mm.835 /UG_TITLE=ESTs
1454384_at	63	128	2.03	Sntb2	Syntrophin, basic 2						gb:AV153710 /DB_XREF=gi:5358916 /DB_XREF=AV153710 /CLONE=2900057C01 /FEA=mRNA /CNT=2 /TID=Mm.158921.1 /TIER=ConsEnd /STK=0 /UG=Mm.158921 /LL=72987 /UG_GENE=2900057C01Rik /UG_TITLE=RIKEN cDNA 2900057C01 gene
1435420_at	306	617	2.02	C330016K18Rik	RIKEN cDNA C330016K18 gene						gb:BB405006 /DB_XREF=gi:15411868 /DB_XREF=BB405006 /CLONE=C330038O13 /FEA=EST /CNT=17 /TID=Mm.204806.1 /TIER=Stack /STK=17 /UG=Mm.204806 /UG_TITLE=ESTs
1417649_at	295	594	2.01	Cdkn1c	Cyclin-dependent kinase inhibitor 1C (P57)						gb:NM_009876.1 /DB_XREF=gi:6753387 /GEN=Cdkn1c /FEA=FLmRNA /CNT=214 /TID=Mm.168789.1 /TIER=FL+Stack /STK=39 /UG=Mm.168789 /LL=12577 /DEF=Mus musculus cyclin-dependent kinase inhibitor 1C (P57) (Cdkn1c), mRNA. /PROD=cyclin-dependent kinase inhibitor 1C (P57) /FL=gb:U20553.1 gb:NM_009876.1 gb:U22399.1 gb:BC005412.1
1454773_at	273	550	2.01	Rxra	Retinoid X receptor alpha						gb:BQ175050 /DB_XREF=gi:20350547 /DB_XREF=UI-M-DJ2-bwd-i-21-0-UI.s1 /CLONE=UI-M-DJ2-bwd-i-21-0-UI /FEA=EST /CNT=108 /TID=Mm.24624.2 /TIER=Stack /STK=51 /UG=Mm.24624 /LL=81702 /UG_GENE=Gtar-pending /UG_TITLE=gene trap ankyrin repeat
Crx;Nrl-upregulated genes
Affy_ID	Crx;Nrl_ave	wt_ave	wt_ave/Crx;Nrl_ave	Gene symbol	Gene name	Additional Affy_IDs					Additional gene information
1418909_at	7786	61	0.01	Ermap	Erythroblast membrane-associated protein						gb:NM_013848.1 /DB_XREF=gi:7305040 /GEN=Ermap /FEA=FLmRNA /CNT=44 /TID=Mm.24043.1 /TIER=FL+Stack /STK=16 /UG=Mm.24043 /LL=27028 /DEF=Mus musculus erythroblast membrane-associated protein (Ermap), mRNA. /PROD=erythroblast membrane-associated protein /FL=gb:NM_013848.1 gb:AF153906.1
1450779_at	10899	190	0.02	Fabp7	Fatty acid binding protein 7, brain						gb:NM_021272.1 /DB_XREF=gi:10946571 /GEN=Fabp7 /FEA=FLmRNA /CNT=58 /TID=Mm.3644.1 /TIER=FL+Stack /STK=9 /UG=Mm.3644 /LL=12140 /DEF=Mus musculus fatty acid binding protein 7, brain (Fabp7), mRNA. /PROD=brain lipid binding protein /FL=gb:NM_021272.1
1428074_at	5971	322	0.05	2310037P21Rik	RIKEN cDNA 2310037P21 gene	1452652_at					gb:AK009669.1 /DB_XREF=gi:12844607 /FEA=mRNA /CNT=177 /TID=Mm.8569.1 /TIER=Stack /STK=151 /UG=Mm.8569 /LL=72309 /UG_GENE=2310037P21Rik /UG_TITLE=RIKEN cDNA 2310037P21 gene /DEF=Mus musculus adult male tongue cDNA, RIKEN full-length enriched library, clone:2310037P21:homolog to HYPOTHETICAL 15.1 KDA PROTEIN (FRAGMENT), full insert sequence.
1450492_at	7983	512	0.06	Cngb3	Cyclic nucleotide gated channel beta 3						gb:NM_013927.1 /DB_XREF=gi:8393163 /GEN=Cngb3 /FEA=FLmRNA /CNT=7 /TID=Mm.103575.1 /TIER=FL /STK=1 /UG=Mm.103575 /LL=30952 /DEF=Mus musculus cyclic nucleotide gated channel beta 3 (Cngb3), mRNA. /PROD=cyclic nucleotide gated channel beta 3 /FL=gb:NM_013927.1
1431213_a_at	5881	422	0.07	Chd9	Chromodomain helicase DNA binding protein 9						gb:BG297038 /DB_XREF=gi:13060290 /DB_XREF=602394895F1 /CLONE=IMAGE:4506814 /FEA=mRNA /CNT=9 /TID=Mm.157900.1 /TIER=ConsEnd /STK=0 /UG=Mm.157900 /LL=67527 /UG_GENE=1300007C21Rik /UG_TITLE=RIKEN cDNA 1300007C21 gene
1451297_at	7237	581	0.08	Gulo	Gulonolactone (L-) oxidase						gb:BC019856.1 /DB_XREF=gi:18044344 /FEA=FLmRNA /CNT=95 /TID=Mm.26207.1 /TIER=FL+Stack /STK=40 /UG=Mm.26207 /DEF=Mus musculus, clone MGC:29968 IMAGE:5123684, mRNA, complete cds. /PROD=Unknown (protein for MGC:29968) /FL=gb:BC019856.1
1450830_a_at	14126	1606	0.11	Pde6c	Phosphodiesterase 6C, cGMP specific, cone, alpha prime						gb:NM_033614.1 /DB_XREF=gi:15809035 /GEN=Pde6c /FEA=FLmRNA /CNT=6 /TID=Mm.196971.1 /TIER=FL /STK=0 /UG=Mm.196971 /LL=110855 /DEF=Mus musculus phosphodiesterase 6C, cGMP specific, cone, alpha prime (Pde6c), mRNA. /PROD=phosphodiesterase 6C, cGMP specific, cone, alphaprime /FL=gb:AF411063.1 gb:NM_033614.1
1417065_at	7591	1127	0.15	Egr1	Early growth response 1						gb:NM_007913.1 /DB_XREF=gi:6681284 /GEN=Egr1 /FEA=FLmRNA /CNT=130 /TID=Mm.181959.1 /TIER=FL+Stack /STK=58 /UG=Mm.181959 /LL=13653 /DEF=Mus musculus early growth response 1 (Egr1), mRNA. /PROD=early growth response 1 /FL=gb:M20157.1 gb:M22326.1 gb:NM_007913.1
1423420_at	7919	1473	0.19	Adrb1	Adrenergic receptor, beta 1						gb:AK018378.1 /DB_XREF=gi:12858051 /GEN=Adrb1 /FEA=FLmRNA /CNT=61 /TID=Mm.46797.1 /TIER=Stack /STK=42 /UG=Mm.46797 /LL=11554 /UG_TITLE=adrenergic receptor, beta 1 /DEF=Mus musculus 16 days embryo lung cDNA, RIKEN full-length enriched library, clone:8430404D20:adrenergic receptor, beta 1, full insert sequence. /FL=gb:NM_007419.1
1424699_at	9656	2005	0.21	4921511K06Rik	RIKEN cDNA 4921511K06 gene						gb:BC006583.1 /DB_XREF=gi:13879231 /FEA=FLmRNA /CNT=43 /TID=Mm.152589.1 /TIER=FL+Stack /STK=19 /UG=Mm.152589 /DEF=Mus musculus, Similar to hypothetical protein DKFZp434G156, clone MGC:8047 IMAGE:3587121, mRNA, complete cds. /PROD=Similar to hypothetical protein DKFZp434G156 /FL=gb:BC006583.1
1416444_at	5257	1105	0.21	Elovl2	Elongation of very long chain fatty acids (FEN1/Elo2, SUR4/Elo3, yeast)-like 2						gb:NM_019423.1 /DB_XREF=gi:9507146 /GEN=Elovl2 /FEA=FLmRNA /CNT=140 /TID=Mm.2567.1 /TIER=FL+Stack /STK=89 /UG=Mm.2567 /LL=54326 /DEF=Mus musculus elongation of very long chain fatty acids (FEN1Elo2, SUR4Elo3, yeast)-like 2 (Elovl2), mRNA. /PROD=sequence similarity to Cig30 2 /FL=gb:NM_019423.1 gb:AF170908.1
1453063_at	9784	2355	0.24	Cltb	Clathrin, light polypeptide (Lcb)	1460740_at	1456797_at				gb:AK009844.1 /DB_XREF=gi:12844890 /FEA=mRNA /CNT=119 /TID=Mm.36879.1 /TIER=Stack /STK=30 /UG=Mm.36879 /LL=74325 /UG_GENE=Cltb /UG_TITLE=clathrin, light polypeptide (Lcb) /DEF=Mus musculus adult male tongue cDNA, RIKEN full-length enriched library, clone:2310046E19:homolog to CLATHRIN LIGHT CHAIN B (LCB), full insert sequence.
1442160_at	7875	1873	0.24	7530404M11Rik	RIKEN cDNA 7530404M11 gene						gb:AV360034 /DB_XREF=gi:16397431 /DB_XREF=AV360034 /CLONE=7530404M11 /FEA=EST /CNT=7 /TID=Mm.192144.1 /TIER=ConsEnd /STK=3 /UG=Mm.192144 /UG_TITLE=ESTs
1448676_at	5471	1428	0.26	Camk2b	Calcium/calmodulin-dependent protein kinase II, beta	1455869_at					gb:NM_007595.1 /DB_XREF=gi:6671659 /GEN=Camk2b /FEA=FLmRNA /CNT=94 /TID=Mm.4857.1 /TIER=FL+Stack /STK=48 /UG=Mm.4857 /LL=12323 /DEF=Mus musculus calciumcalmodulin-dependent protein kinase II, beta (Camk2b), mRNA. /PROD=calciumcalmodulin-dependent protein kinase II,beta /FL=gb:NM_007595.1
1449482_at	8108	2343	0.29	Hist3h2ba	Histone 3, H2ba						gb:NM_030082.1 /DB_XREF=gi:13386451 /GEN=1500011O09Rik /FEA=FLmRNA /CNT=23 /TID=Mm.28022.1 /TIER=FL+Stack /STK=9 /UG=Mm.28022 /LL=78303 /DEF=Mus musculus RIKEN cDNA 1500011O09 gene (1500011O09Rik), mRNA. /PROD=RIKEN cDNA 1500011O09 /FL=gb:NM_030082.1
1422907_at	22199	6672	0.3	Gnat2	Guanine nucleotide binding protein, alpha transducing 2						gb:NM_008141.1 /DB_XREF=gi:6680042 /GEN=Gnat2 /FEA=FLmRNA /CNT=25 /TID=Mm.4805.1 /TIER=FL+Stack /STK=8 /UG=Mm.4805 /LL=14686 /DEF=Mus musculus guanine nucleotide binding protein, alpha transducing 2 (Gnat2), mRNA. /PROD=guanine nucleotide binding protein, alphatransducing 2 /FL=gb:NM_008141.1 gb:BC016272.1 gb:L10666.1
1416250_at	9501	2875	0.3	Btg2	B-cell translocation gene 2, anti-proliferative	1448272_at					gb:BG965405 /DB_XREF=gi:14353042 /DB_XREF=602830441F1 /CLONE=IMAGE:4984979 /FEA=FLmRNA /CNT=229 /TID=Mm.903.1 /TIER=Stack /STK=23 /UG=Mm.903 /LL=12227 /UG_GENE=Btg2 /UG_TITLE=B-cell translocation gene 2, anti-proliferative /FL=gb:NM_007570.1
1450765_a_at	16096	5850	0.36	Pde6h	Phosphodiesterase 6H, cGMP-specific, cone, gamma	1450766_at					gb:NM_023898.1 /DB_XREF=gi:12963860 /GEN=Pde6h /FEA=FLmRNA /CNT=14 /TID=Mm.138001.1 /TIER=FL+Stack /STK=11 /UG=Mm.138001 /LL=78600 /DEF=Mus musculus phosphodiesterase 6H, cGMP-specific, cone, gamma (Pde6h), mRNA. /PROD=phosphodiesterase 6H, cGMP-specific, cone,gamma /FL=gb:AF190929.1 gb:NM_023898.1
1425784_a_at	9684	3606	0.37	Olfm1	Olfactomedin 1	1455796_x_at	1426562_a_at				gb:D78264.1 /DB_XREF=gi:3218527 /FEA=FLmRNA /CNT=5 /TID=Mm.43278.2 /TIER=FL /STK=1 /UG=Mm.43278 /LL=56177 /UG_GENE=Olfm1 /DEF=Mus musculus mRNA for pancortin-3, complete cds. /PROD=pancortin-3 /FL=gb:AF028740.1 gb:D78264.1
1448388_a_at	9405	3461	0.37	1110002B05Rik	RIKEN cDNA 1110002B05 gene						gb:NM_134054.1 /DB_XREF=gi:19527271 /GEN=1110002B05Rik /FEA=FLmRNA /CNT=172 /TID=Mm.30053.1 /TIER=FL+Stack /STK=80 /UG=Mm.30053 /LL=104725 /DEF=Mus musculus RIKEN cDNA 1110002B05 gene (1110002B05Rik), mRNA. /PROD=1110002B05Rik /FL=gb:BC022674.1 gb:NM_134054.1
1450080_at	6714	2511	0.37	Cxx1c	CAAX box 1 homolog C (human)						gb:NM_028375.1 /DB_XREF=gi:13386305 /GEN=2900027G03Rik /FEA=FLmRNA /CNT=29 /TID=Mm.158897.1 /TIER=FL /STK=2 /UG=Mm.158897 /LL=72865 /DEF=Mus musculus RIKEN cDNA 2900027G03 gene (2900027G03Rik), mRNA. /PROD=RIKEN cDNA 2900027G03 /FL=gb:NM_028375.1
1455462_at	5375	2036	0.38	Adcy2	Adenylate cyclase 2						gb:AV025455 /DB_XREF=gi:16356440 /DB_XREF=AV025455 /CLONE=1200013K02 /FEA=EST /CNT=19 /TID=Mm.20371.1 /TIER=Stack /STK=13 /UG=Mm.20371 /UG_TITLE=ESTs, Weakly similar to ADENYLATE CYCLASE, TYPE VII (M.musculus)
1456971_at	6904	2756	0.4								gb:BB280296 /DB_XREF=gi:15411079 /DB_XREF=BB280296 /CLONE=A930025C02 /FEA=EST /CNT=6 /TID=Mm.134468.1 /TIER=ConsEnd /STK=6 /UG=Mm.134468 /UG_TITLE=ESTs, Weakly similar to EAT1 MOUSE EXCITATORY AMINO ACID TRANSPORTER 1 (M.musculus)
1435720_at	6140	2430	0.4	Kcnd3	Potassium voltage-gated channel, Shal-related family, member 3	1447513_at	1442555_at				gb:AW045978 /DB_XREF=gi:5906507 /DB_XREF=UI-M-BH1-alc-b-01-0-UI.s1 /CLONE=UI-M-BH1-alc-b-01-0-UI /FEA=EST /CNT=18 /TID=Mm.44530.1 /TIER=Stack /STK=14 /UG=Mm.44530 /LL=99868 /UG_GENE=AW045978 /UG_TITLE=expressed sequence AW045978
1415885_at	25167	10243	0.41	Chgb	Chromogranin B						gb:NM_007694.1 /DB_XREF=gi:6680933 /GEN=Chgb /FEA=FLmRNA /CNT=226 /TID=Mm.1339.1 /TIER=FL+Stack /STK=184 /UG=Mm.1339 /LL=12653 /DEF=Mus musculus chromogranin B (Chgb), mRNA. /PROD=chromogranin B /FL=gb:NM_007694.1 gb:BC014736.1
1424885_at	5832	2400	0.41	Klhdc8a	Kelch domain containing 8A	1441940_x_at					gb:BC011135.1 /DB_XREF=gi:15029823 /FEA=FLmRNA /CNT=41 /TID=Mm.39723.1 /TIER=FL+Stack /STK=12 /UG=Mm.39723 /DEF=Mus musculus, Similar to hypothetical protein FLJ10748, clone MGC:19056 IMAGE:4191503, mRNA, complete cds. /PROD=Similar to hypothetical protein FLJ10748 /FL=gb:BC011135.1
1448628_at	11553	5137	0.44	Scg3	Secretogranin III						gb:NM_009130.1 /DB_XREF=gi:6677866 /GEN=Scg3 /FEA=FLmRNA /CNT=84 /TID=Mm.2386.1 /TIER=FL+Stack /STK=52 /UG=Mm.2386 /LL=20255 /DEF=Mus musculus secretogranin III (Scg3), mRNA. /PROD=secretogranin III /FL=gb:U02982.1 gb:BC024785.1 gb:NM_009130.1
1425926_a_at	11720	5364	0.46	Otx2	Orthodenticle homolog 2 (Drosophila)						gb:BC017609.1 /DB_XREF=gi:17160873 /FEA=FLmRNA /CNT=2 /TID=Mm.134516.1 /TIER=FL /STK=1 /UG=Mm.134516 /DEF=Mus musculus, clone MGC:27657 IMAGE:4527414, mRNA, complete cds. /PROD=Unknown (protein for MGC:27657) /FL=gb:BC017609.1
1423349_at	5551	2710	0.49	Socs5	Suppressor of cytokine signaling 5	1441640_at	1423350_at				gb:BM212831 /DB_XREF=gi:17770506 /DB_XREF=C0827G07-3 /CLONE=C0827G07 /FEA=FLmRNA /CNT=70 /TID=Mm.37204.1 /TIER=Stack /STK=13 /UG=Mm.37204 /LL=56468 /UG_GENE=Socs5 /UG_TITLE=Socs-5 /FL=gb:AF033187.1 gb:NM_019654.1
1422895_at	5531	2697	0.49	Vamp4	Vesicle-associated membrane protein 4						gb:NM_016796.1 /DB_XREF=gi:7949159 /GEN=Vamp4 /FEA=FLmRNA /CNT=76 /TID=Mm.10699.1 /TIER=FL+Stack /STK=8 /UG=Mm.10699 /LL=53330 /DEF=Mus musculus vesicle-associated membrane protein 4 (Vamp4), mRNA. /PROD=vesicle-associated membrane protein 4 /FL=gb:NM_016796.1 gb:AF061516.1
1418571_at	1448	37	0.03	Tnfrsf12a	Tumor necrosis factor receptor superfamily, member 12a	1418572_x_at					gb:NM_013749.1 /DB_XREF=gi:7305058 /GEN=Fn14-pending /FEA=FLmRNA /CNT=79 /TID=Mm.28518.1 /TIER=FL+Stack /STK=21 /UG=Mm.28518 /LL=27279 /DEF=Mus musculus type I transmembrane protein Fn14 (Fn14-pending), mRNA. /PROD=type I transmembrane protein Fn14 /FL=gb:AF156164.1 gb:BC025860.1 gb:NM_013749.1
1430207_at	1670	66	0.04								gb:AV265727 /DB_XREF=gi:6253762 /DB_XREF=AV265727 /CLONE=4930511C13 /FEA=mRNA /CNT=5 /TID=Mm.133050.1 /TIER=ConsEnd /STK=3 /UG=Mm.133050 /LL=66783 /UG_GENE=4933437N03Rik /UG_TITLE=RIKEN cDNA 4933437N03 gene
1441809_at	1655	86	0.05	A930009A15Rik	RIKEN cDNA A930009A15 gene	1450988_at					gb:BB805891 /DB_XREF=gi:16978520 /DB_XREF=BB805891 /CLONE=G630071N19 /FEA=EST /CNT=4 /TID=Mm.146654.1 /TIER=ConsEnd /STK=4 /UG=Mm.146654 /UG_TITLE=ESTs
1453398_at	2408	153	0.06	A930009A15Rik	RIKEN cDNA A930009A15 gene						gb:AK020834.1 /DB_XREF=gi:12861538 /FEA=mRNA /CNT=6 /TID=Mm.132267.1 /TIER=ConsEnd /STK=4 /UG=Mm.132267 /LL=77798 /UG_GENE=A930009A15Rik /UG_TITLE=RIKEN cDNA A930009A15 gene /DEF=Mus musculus adult retina cDNA, RIKEN full-length enriched library, clone:A930009A15:unclassifiable, full insert sequence.
1452928_at	1014	62	0.06	Abi3	ABI gene family, member 3						gb:AK008928.1 /DB_XREF=gi:12843411 /FEA=mRNA /CNT=51 /TID=Mm.58065.1 /TIER=Stack /STK=19 /UG=Mm.58065 /LL=66610 /UG_GENE=2210414K06Rik /UG_TITLE=RIKEN cDNA 2210414K06 gene /DEF=Mus musculus adult male stomach cDNA, RIKEN full-length enriched library, clone:2210414K06:homolog to human NESH which encodes a putative signaling molecule similar to e3B1 protein, full insert sequence.
1440257_at	1071	73	0.07	Obox6	Oocyte specific homeobox 6						gb:BG069935 /DB_XREF=gi:12552592 /DB_XREF=H3082G07-3 /CLONE=H3082G07 /FEA=EST /CNT=13 /TID=Mm.25863.1 /TIER=ConsEnd /STK=5 /UG=Mm.25863 /LL=52031 /UG_GENE=D17Ertd599e /UG_TITLE=DNA segment, Chr 17, ERATO Doi 599, expressed
1454770_at	4511	365	0.08	Cckbr	Cholecystokinin B receptor	1460663_at					gb:AV221910 /DB_XREF=gi:15404818 /DB_XREF=AV221910 /CLONE=3632432P12 /FEA=EST /CNT=52 /TID=Mm.44513.2 /TIER=Stack /STK=52 /UG=Mm.44513 /LL=12426 /UG_GENE=Cckbr /UG_TITLE=cholecystokinin B receptor
1427261_at	1528	123	0.08	Wwc1	WW, C2 and coiled-coil domain containing 1						gb:BQ176786 /DB_XREF=gi:20352278 /DB_XREF=UI-M-DJ2-bvz-p-09-0-UI.s1 /CLONE=UI-M-DJ2-bvz-p-09-0-UI /FEA=mRNA /CNT=100 /TID=Mm.31267.1 /TIER=Stack /STK=19 /UG=Mm.31267 /UG_TITLE=Mus musculus, clone IMAGE:3963643, mRNA, partial cds
1425849_at	1086	83	0.08	Chrnb4	Cholinergic receptor, nicotinic, beta polypeptide 4	1457008_at					gb:AF492840.1 /DB_XREF=gi:20136399 /GEN=Chrnb4 /FEA=FLmRNA /CNT=3 /TID=Mm.219524.1 /TIER=FL /STK=1 /UG=Mm.219524 /DEF=Mus musculus nicotinic acetylcholine receptor beta4 subunit (Chrnb4) mRNA, complete cds. /PROD=nicotinic acetylcholine receptor beta4 subunit /FL=gb:AF492840.1
1439143_at	2223	211	0.09	"9330167E06"	Hypothetical protein 9330167E06						gb:BB312992 /DB_XREF=gi:9013697 /DB_XREF=BB312992 /CLONE=B230339H07 /FEA=EST /CNT=11 /TID=Mm.140056.1 /TIER=Stack /STK=8 /UG=Mm.140056 /UG_TITLE=ESTs
1416342_at	3122	330	0.11	Tnc	Tenascin C						gb:NM_011607.1 /DB_XREF=gi:7106434 /GEN=Tnc /FEA=FLmRNA /CNT=183 /TID=Mm.980.1 /TIER=FL+Stack /STK=96 /UG=Mm.980 /LL=21923 /DEF=Mus musculus tenascin C (Tnc), mRNA. /PROD=tenascin C /FL=gb:D90343.1 gb:NM_011607.1
1426858_at	1958	212	0.11	Inhbb	Inhibin beta-B						gb:BB353211 /DB_XREF=gi:16405526 /DB_XREF=BB353211 /CLONE=B930092O10 /FEA=mRNA /CNT=106 /TID=Mm.3092.1 /TIER=Stack /STK=48 /UG=Mm.3092 /LL=16324 /UG_GENE=Inhbb /UG_TITLE=inhibin beta-B
1428733_at	1002	132	0.13	Gngt2	Guanine nucleotide binding protein (G protein), gamma transducing activity polypeptide 2						gb:AK010554.1 /DB_XREF=gi:12846082 /GEN=Gngt2 /FEA=mRNA /CNT=30 /TID=Mm.46299.1 /TIER=Stack /STK=24 /UG=Mm.46299 /LL=14710 /UG_TITLE=guanine nucleotide binding protein (G protein), gamma transducing activity polypeptide 2 /DEF=Mus musculus ES cells cDNA, RIKEN full-length enriched library, clone:2410018N20:guanine nucleotide binding protein (G protein), gamma transducing activity polypeptide 2, f…
1439911_at	1546	214	0.14		Adult male urinary bladder cDNA, RIKEN full-length enriched library, clone:9530055O04 product:unclassifiable, full insert sequence						gb:BB283577 /DB_XREF=gi:8984026 /DB_XREF=BB283577 /CLONE=A930102L05 /FEA=EST /CNT=8 /TID=Mm.45793.1 /TIER=ConsEnd /STK=6 /UG=Mm.45793 /UG_TITLE=ESTs
1416635_at	1375	199	0.14	Smpdl3a	Sphingomyelin phosphodiesterase, acid-like 3A						gb:NM_020561.1 /DB_XREF=gi:10181129 /GEN=Asml3a-pending /FEA=FLmRNA /CNT=127 /TID=Mm.2379.1 /TIER=FL+Stack /STK=77 /UG=Mm.2379 /LL=57319 /DEF=Mus musculus acid sphingomyelinase-like phosphodiesterase 3a (Asml3a-pending), mRNA. /PROD=acid sphingomyelinase-like phosphodiesterase 3a /FL=gb:NM_020561.1
1454799_at	1237	169	0.14	A230097K15Rik	RIKEN cDNA A230097K15 gene						gb:AV300264 /DB_XREF=gi:15405905 /DB_XREF=AV300264 /CLONE=5730479B18 /FEA=EST /CNT=58 /TID=Mm.33759.2 /TIER=Stack /STK=46 /UG=Mm.33759 /LL=75802 /UG_GENE=4930458D05Rik /UG_TITLE=RIKEN cDNA 4930458D05 gene
1437091_at	2298	346	0.15	Accn4	Amiloride-sensitive cation channel 4, pituitary						gb:AV323885 /DB_XREF=gi:15406242 /DB_XREF=AV323885 /CLONE=6230414D01 /FEA=EST /CNT=27 /TID=Mm.110790.1 /TIER=Stack /STK=26 /UG=Mm.110790 /UG_TITLE=ESTs, Weakly similar to JE0091 testis sodium channel 1 (H.sapiens)
1439078_at	1551	234	0.15	Klhl4	Kelch-like 4 (Drosophila)						gb:BB037068 /DB_XREF=gi:15403720 /DB_XREF=BB037068 /CLONE=5930422O20 /FEA=EST /CNT=19 /TID=Mm.132583.1 /TIER=Stack /STK=8 /UG=Mm.132583 /UG_TITLE=ESTs, Moderately similar to KHL1_MOUSE Kelch-like protein 1 (M.musculus)
1452010_at	1338	200	0.15	Chrna3	Cholinergic receptor, nicotinic, alpha polypeptide 3	1455931_at					gb:AF472588.1 /DB_XREF=gi:19073314 /FEA=FLmRNA /CNT=30 /TID=Mm.205308.1 /TIER=FL+Stack /STK=15 /UG=Mm.205308 /DEF=Mus musculus nicotinic acetylcholine receptor alpha 3 subunit mRNA, complete cds. /PROD=nicotinic acetylcholine receptor alpha 3subunit /FL=gb:AF472588.1 gb:AF459029.1
1420965_a_at	3111	494	0.16	Enc1	Ectodermal-neural cortex 1	1450061_at					gb:BM120053 /DB_XREF=gi:17088091 /DB_XREF=L0934D01-3 /CLONE=L0934D01 /FEA=FLmRNA /CNT=116 /TID=Mm.30502.1 /TIER=Stack /STK=24 /UG=Mm.30502 /LL=13803 /UG_GENE=Enc1 /UG_TITLE=ectodermal-neural cortex 1 /FL=gb:NM_007930.1 gb:U65079.1
1425616_a_at	3690	668	0.18	Ccdc23	Coiled-coil domain containing 23						gb:BC002274.1 /DB_XREF=gi:12805588 /FEA=FLmRNA /CNT=12 /TID=Mm.36697.1 /TIER=FL /STK=1 /UG=Mm.36697 /LL=69216 /UG_GENE=2410005K17Rik /DEF=Mus musculus, clone MGC:7676 IMAGE:3496493, mRNA, complete cds. /PROD=Unknown (protein for MGC:7676) /FL=gb:BC002274.1
1448602_at	4887	927	0.19	Pygm	Muscle glycogen phosphorylase						gb:NM_011224.1 /DB_XREF=gi:6755255 /GEN=Pygm /FEA=FLmRNA /CNT=92 /TID=Mm.27806.1 /TIER=FL+Stack /STK=55 /UG=Mm.27806 /LL=19309 /DEF=Mus musculus muscle glycogen phosphorylase (Pygm), mRNA. /PROD=muscle glycogen phosphorylase /FL=gb:AF124787.1 gb:NM_011224.1 gb:BC012961.1
1420425_at	2748	513	0.19	Prdm1	PR domain containing 1, with ZNF domain						gb:NM_007548.1 /DB_XREF=gi:6680783 /GEN=Prdm1 /FEA=FLmRNA /CNT=16 /TID=Mm.4800.1 /TIER=FL /STK=5 /UG=Mm.4800 /LL=12142 /DEF=Mus musculus PR domain containing 1, with ZNF domain (Prdm1), mRNA. /PROD=B lymphocyte induced maturation protein /FL=gb:U08185.1 gb:NM_007548.1
1438081_at	1890	358	0.19	Mcc	Mutated in colorectal cancers						gb:BB794635 /DB_XREF=gi:16964254 /DB_XREF=BB794635 /CLONE=G431001D24 /FEA=EST /CNT=15 /TID=Mm.210479.1 /TIER=Stack /STK=12 /UG=Mm.210479 /UG_TITLE=ESTs
1423503_at	2620	520	0.2	Jam3	Junction adhesion molecule 3	1444895_at	1423504_at				gb:AK013156.1 /DB_XREF=gi:12850342 /GEN=Jcam2 /FEA=FLmRNA /CNT=157 /TID=Mm.28770.1 /TIER=Stack /STK=14 /UG=Mm.28770 /LL=83964 /UG_TITLE=junction cell adhesion molecule 3 /DEF=Mus musculus 10, 11 days embryo whole body cDNA, RIKEN full-length enriched library, clone:2810425J03:junction cell adhesion molecule 2, full insert sequence. /FL=gb:NM_023277.1 gb:BC024357.1
1437231_at	2182	441	0.2	Slitrk6	SLIT and NTRK-like family, member 6						gb:AV246497 /DB_XREF=gi:16387108 /DB_XREF=AV246497 /CLONE=4832410J21 /FEA=EST /CNT=22 /TID=Mm.49728.1 /TIER=Stack /STK=22 /UG=Mm.49728 /UG_TITLE=ESTs
1434177_at	1753	348	0.2	Ece1	Endothelin converting enzyme 1	1455741_a_at					gb:AI551117 /DB_XREF=gi:4483480 /DB_XREF=vx39a03.x1 /CLONE=IMAGE:1277548 /FEA=EST /CNT=139 /TID=Mm.21657.1 /TIER=Stack /STK=39 /UG=Mm.21657 /LL=100412 /UG_GENE=AW322500 /UG_TITLE=expressed sequence AW322500
1417667_a_at	1709	339	0.2	Pter	Phosphotriesterase related						gb:NM_008961.1 /DB_XREF=gi:6679524 /GEN=Pter /FEA=FLmRNA /CNT=68 /TID=Mm.2008.1 /TIER=FL+Stack /STK=39 /UG=Mm.2008 /LL=19212 /DEF=Mus musculus phosphotriesterase related (Pter), mRNA. /PROD=phosphotriesterase related /FL=gb:BC003793.1 gb:U28016.1 gb:NM_008961.1
1429036_at	1113	228	0.2	Otop3	Otopetrin 3						gb:AK009293.1 /DB_XREF=gi:12844000 /FEA=mRNA /CNT=16 /TID=Mm.101844.1 /TIER=Stack /STK=14 /UG=Mm.101844 /LL=69602 /UG_GENE=2310011E08Rik /UG_TITLE=RIKEN cDNA 2310011E08 gene /DEF=Mus musculus adult male tongue cDNA, RIKEN full-length enriched library, clone:2310011E08:hypothetical protein, full insert sequence.
1435452_at	1015	203	0.2	Tmem20	Transmembrane protein 20						gb:BM121082 /DB_XREF=gi:17089108 /DB_XREF=L0948B08-3 /CLONE=L0948B08 /FEA=EST /CNT=25 /TID=Mm.123755.1 /TIER=Stack /STK=16 /UG=Mm.123755 /UG_TITLE=ESTs
1432646_a_at	1319	282	0.21	2900097C17Rik	RIKEN cDNA 2900097C17 gene						gb:AK013851.1 /DB_XREF=gi:12851370 /FEA=mRNA /CNT=3 /TID=Mm.15985.3 /TIER=ConsEnd /STK=0 /UG=Mm.15985 /LL=14705 /UG_GENE=Gng3lg /UG_TITLE=G protein gamma 3 linked gene /DEF=Mus musculus adult male hippocampus cDNA, RIKEN full-length enriched library, clone:2900097C17:unclassifiable transcript, full insert sequence.
1453127_at	2328	502	0.22	Ppm1j	Protein phosphatase 1J						gb:AK009235.1 /DB_XREF=gi:12843901 /FEA=mRNA /CNT=38 /TID=Mm.34387.1 /TIER=Stack /STK=28 /UG=Mm.34387 /LL=71887 /UG_GENE=2310008J22Rik /UG_TITLE=RIKEN cDNA 2310008J22 gene /DEF=Mus musculus adult male tongue cDNA, RIKEN full-length enriched library, clone:2310008J22:homolog to HYPOTHETICAL 33.5 KDA PROTEIN, full insert sequence.
1416992_at	1309	294	0.22	Mfng	Manic fringe homolog (Drosophila)						gb:NM_008595.1 /DB_XREF=gi:6678871 /GEN=Mfng /FEA=FLmRNA /CNT=94 /TID=Mm.517.1 /TIER=FL+Stack /STK=61 /UG=Mm.517 /LL=17305 /DEF=Mus musculus manic fringe homolog (Drosophila) (Mfng), mRNA. /PROD=manic fringe homolog (Drosophila) /FL=gb:BC010983.1 gb:AF015769.1 gb:U94349.1 gb:NM_008595.1
1444317_at	4562	1037	0.23								gb:BB078305 /DB_XREF=gi:16260464 /DB_XREF=BB078305 /CLONE=9330152J21 /FEA=EST /CNT=5 /TID=Mm.132257.1 /TIER=ConsEnd /STK=2 /UG=Mm.132257 /LL=103508 /UG_GENE=BB078305 /UG_TITLE=expressed sequence BB078305
1456819_at	4050	941	0.23	G630049C14Rik	RIKEN cDNA G630049C14 gene						gb:BE647993 /DB_XREF=gi:9973813 /DB_XREF=UI-M-BH1-anr-e-01-0-UI.r1 /CLONE=UI-M-BH1-anr-e-01-0-UI /FEA=EST /CNT=8 /TID=Mm.133990.1 /TIER=ConsEnd /STK=7 /UG=Mm.133990 /UG_TITLE=ESTs, Weakly similar to neuritin (Rattus norvegicus) (R.norvegicus)
1419835_s_at	2256	565	0.25	Plec1	Plectin 1	1434610_at					gb:AW123286 /DB_XREF=gi:6098816 /DB_XREF=UI-M-BH2.1-apg-g-06-0-UI.s1 /CLONE=UI-M-BH2.1-apg-g-06-0-UI /FEA=EST /CNT=1 /TID=Mm.215172.1 /TIER=ConsEnd /STK=1 /UG=Mm.215172 /LL=18810 /UG_GENE=Plec1 /UG_TITLE=plectin 1
1452127_a_at	1050	262	0.25	Ptpn13	Protein tyrosine phosphatase, non-receptor type 13						gb:BM236743 /DB_XREF=gi:17872013 /DB_XREF=K0440E08-3 /CLONE=K0440E08 /FEA=FLmRNA /CNT=67 /TID=Mm.3414.2 /TIER=Stack /STK=10 /UG=Mm.3414 /LL=19249 /UG_GENE=Ptpn13 /UG_TITLE=protein tyrosine phosphatase, non-receptor type 13 /FL=gb:D28529.1
1419408_at	4918	1264	0.26	Six6	Sine oculis-related homeobox 6 homolog (Drosophila)						gb:AF050130.2 /DB_XREF=gi:6478864 /GEN=Optx2 /FEA=FLmRNA /CNT=21 /TID=Mm.57138.1 /TIER=FL+Stack /STK=10 /UG=Mm.57138 /LL=20476 /DEF=Mus musculus homeodomain protein (Optx2) mRNA, complete cds. /PROD=homeodomain protein /FL=gb:NM_011384.1 gb:AF135267.1 gb:AF050130.2
1455447_at	2519	656	0.26	D430019H16Rik	RIKEN cDNA D430019H16 gene						gb:BM116882 /DB_XREF=gi:17079900 /DB_XREF=L0842E07-3 /CLONE=L0842E07 /FEA=EST /CNT=35 /TID=Mm.2388.1 /TIER=Stack /STK=13 /UG=Mm.2388 /LL=104898 /UG_GENE=AI852661 /UG_TITLE=expressed sequence AI852661
1416530_a_at	4640	1247	0.27	Pnp	Purine-nucleoside phosphorylase	1453299_a_at					gb:BC003788.1 /DB_XREF=gi:13277800 /FEA=FLmRNA /CNT=135 /TID=Mm.17932.1 /TIER=FL+Stack /STK=83 /UG=Mm.17932 /LL=18950 /UG_GENE=Pnp /DEF=Mus musculus, purine-nucleoside phosphorylase, clone MGC:6018 IMAGE:3600212, mRNA, complete cds. /PROD=purine-nucleoside phosphorylase /FL=gb:L11291.1 gb:L11290.1 gb:NM_013632.1 gb:U35374.1 gb:BC003788.1
1431393_at	4498	1227	0.27	Six6os1	Six6 opposite strand transcript 1	1431896_at	1446260_at				gb:AK015397.1 /DB_XREF=gi:12853723 /FEA=mRNA /CNT=3 /TID=Mm.107632.1 /TIER=ConsEnd /STK=0 /UG=Mm.107632 /LL=75801 /UG_GENE=4930447C04Rik /UG_TITLE=RIKEN cDNA 4930447C04 gene /DEF=Mus musculus adult male testis cDNA, RIKEN full-length enriched library, clone:4930447C04:hypothetical protein, full insert sequence.
1436796_at	1579	430	0.27	Matr3	Matrin 3						gb:BB237072 /DB_XREF=gi:16354866 /DB_XREF=BB237072 /CLONE=A630063B10 /FEA=EST /CNT=77 /TID=Mm.36541.2 /TIER=Stack /STK=51 /UG=Mm.36541 /LL=69967 /UG_GENE=2810017I02Rik /UG_TITLE=RIKEN cDNA 2810017I02 gene
1435206_at	1421	381	0.27	Slc24a4	Solute carrier family 24 (sodium/potassium/calcium exchanger), member 4						gb:BB767169 /DB_XREF=gi:16210049 /DB_XREF=BB767169 /CLONE=G370070E06 /FEA=EST /CNT=21 /TID=Mm.39575.1 /TIER=Stack /STK=19 /UG=Mm.39575 /LL=105022 /UG_GENE=AW492432 /UG_TITLE=expressed sequence AW492432
1460394_a_at	1149	315	0.27	Inppl1	Inositol polyphosphate phosphatase-like 1						gb:BB769433 /DB_XREF=gi:16211975 /DB_XREF=BB769433 /CLONE=G370096A18 /FEA=FLmRNA /CNT=126 /TID=Mm.153865.1 /TIER=Stack /STK=12 /UG=Mm.153865 /LL=16332 /UG_GENE=Inppl1 /UG_TITLE=inositol polyphosphate phosphatase-like 1 /FL=gb:AF162781.1
1416097_at	1135	323	0.28	Lrrc4	Leucine rich repeat containing 4	1435832_at					gb:NM_138682.1 /DB_XREF=gi:20373168 /GEN=MBAG1 /FEA=FLmRNA /CNT=136 /TID=Mm.40158.1 /TIER=FL+Stack /STK=128 /UG=Mm.40158 /LL=192198 /DEF=Mus musculus LIBG-like protein (MBAG1), mRNA. /PROD=LIBG-like protein /FL=gb:AF300458.1 gb:NM_138682.1
1429440_at	1901	555	0.29	1810041L15Rik	RIKEN cDNA 1810041L15 gene	1455515_at					gb:BI734299 /DB_XREF=gi:15711312 /DB_XREF=603351218F1 /CLONE=IMAGE:5358653 /FEA=mRNA /CNT=41 /TID=Mm.22913.1 /TIER=Stack /STK=22 /UG=Mm.22913 /LL=72301 /UG_GENE=1810041L15Rik /UG_TITLE=RIKEN cDNA 1810041L15 gene
1454043_a_at	1643	483	0.29	Kcnab1	Potassium voltage-gated channel, shaker-related subfamily, beta member 1	1448468_a_at					gb:AK015412.1 /DB_XREF=gi:12853746 /GEN=Kcnab1 /FEA=mRNA /CNT=1 /TID=Mm.1438.3 /TIER=ConsEnd /STK=0 /UG=Mm.1438 /LL=16497 /UG_TITLE=potassium voltage-gated channel, shaker-related subfamily, beta member 1 /DEF=Mus musculus adult male testis cDNA, RIKEN full-length enriched library, clone:4930448C07:potassium voltage gated channel, shaker related subfamily, beta member 1, full insert sequence.
1457156_at	1463	417	0.29	Trhde	TRH-degrading enzyme						gb:BB245038 /DB_XREF=gi:16355363 /DB_XREF=BB245038 /CLONE=A730006K16 /FEA=EST /CNT=6 /TID=Mm.131457.1 /TIER=ConsEnd /STK=5 /UG=Mm.131457 /UG_TITLE=ESTs, Highly similar to THDE_RAT Thyrotropin-releasing hormone degrading ectoenzyme (TRH-degrading ectoenzyme) (TRH-DE) (TRH-specific aminopeptidase) (Thyroliberinase) (Pyroglutamyl-peptidase II) (PAP-II) (R.norvegicus)
1435204_at	3104	943	0.3	Prmt8	Protein arginine N-methyltransferase 8						gb:BG065273 /DB_XREF=gi:12547836 /DB_XREF=H3029B12-3 /CLONE=H3029B12 /FEA=EST /CNT=23 /TID=Mm.39750.1 /TIER=Stack /STK=19 /UG=Mm.39750 /UG_TITLE=ESTs, Moderately similar to ANM1_MOUSE PROTEIN ARGININE N-METHYLTRANSFERASE 1 (M.musculus)
1417214_at	1138	339	0.3	Rab27b	RAB27b, member RAS oncogene family	1439610_at	1417215_at				gb:NM_030554.1 /DB_XREF=gi:13385281 /GEN=Rab27b /FEA=FLmRNA /CNT=87 /TID=Mm.190553.1 /TIER=FL+Stack /STK=53 /UG=Mm.190553 /LL=80718 /DEF=Mus musculus RAB27b, member RAS oncogene family (Rab27b), mRNA. /PROD=RAB27b, member RAS oncogene family /FL=gb:NM_030554.1 gb:AB067775.1 gb:AF328893.1
1425516_at	4503	1375	0.31	Ogt	O-linked N-acetylglucosamine (GlcNAc) transferase (UDP-N-acetylglucosamine:polypeptide-N-acetylglucosaminyl transferase)	1460631_at	1451738_at	1425517_s_at	1436780_at		gb:BI657000 /DB_XREF=gi:15571236 /DB_XREF=603282226F1 /CLONE=IMAGE:5326423 /FEA=FLmRNA /CNT=98 /TID=Mm.220820.1 /TIER=ConsEnd /STK=0 /UG=Mm.220820 /LL=108155 /UG_GENE=Ogt /UG_TITLE=O-linked N-acetylglucosamine (GlcNAc) transferase (UDP-N-acetylglucosamine:polypeptide-N-acetylglucosaminyl transferase) /FL=gb:AF363030.1
1452601_a_at	2261	692	0.31	Acbd6	Acyl-Coenzyme A binding domain containing 6	1453199_at					gb:AK002470.1 /DB_XREF=gi:12832476 /FEA=mRNA /CNT=27 /TID=Mm.22537.1 /TIER=Stack /STK=19 /UG=Mm.22537 /LL=72482 /UG_GENE=2610100E10Rik /UG_TITLE=RIKEN cDNA 2610100E10 gene /DEF=Mus musculus adult male kidney cDNA, RIKEN full-length enriched library, clone:0610010G04:homolog to ACYL-COA-BINDING PROTEIN (ACBP) (DIAZEPAM BINDING INHIBITOR) (DBI) (ENDOZEPINE) (EP), full insert sequence.
1442254_at	2173	676	0.31	Dgkd	Diacylglycerol kinase, delta						gb:BB366659 /DB_XREF=gi:16406457 /DB_XREF=BB366659 /CLONE=C130034I19 /FEA=EST /CNT=5 /TID=Mm.207501.1 /TIER=ConsEnd /STK=3 /UG=Mm.207501 /UG_TITLE=ESTs
1451264_at	1031	315	0.31	Frmd6	FERM domain containing 6						gb:BC019939.1 /DB_XREF=gi:18043320 /FEA=FLmRNA /CNT=120 /TID=Mm.2962.1 /TIER=FL+Stack /STK=48 /UG=Mm.2962 /LL=105012 /UG_GENE=2610019M19Rik /DEF=Mus musculus, RIKEN cDNA 2610019M19 gene, clone MGC:28301 IMAGE:4012649, mRNA, complete cds. /PROD=RIKEN cDNA 2610019M19 gene /FL=gb:BC019939.1
1431322_at	1027	315	0.31	Igsf3	Immunoglobulin superfamily, member 3	1455048_at					gb:AK019524.1 /DB_XREF=gi:12859786 /FEA=mRNA /CNT=5 /TID=Mm.89706.1 /TIER=ConsEnd /STK=0 /UG=Mm.89706 /LL=78908 /UG_GENE=4833439O17Rik /UG_TITLE=RIKEN cDNA 4833439O17 gene /DEF=Mus musculus 0 day neonate head cDNA, RIKEN full-length enriched library, clone:4833439O17:unclassifiable transcript, full insert sequence.
1421840_at	3591	1160	0.32	Abca1	ATP-binding cassette, sub-family A (ABC1), member 1	1450392_at					gb:BB305534 /DB_XREF=gi:15411280 /DB_XREF=BB305534 /CLONE=B230120E19 /FEA=FLmRNA /CNT=126 /TID=Mm.369.1 /TIER=Stack /STK=28 /UG=Mm.369 /LL=11303 /UG_GENE=Abca1 /UG_TITLE=ATP-binding cassette, sub-family A (ABC1), member 1 /FL=gb:NM_013454.1
1420858_at	2043	646	0.32	Pkia	Protein kinase inhibitor, alpha	1420859_at					gb:NM_008862.1 /DB_XREF=gi:6679358 /GEN=Pkia /FEA=FLmRNA /CNT=134 /TID=Mm.3193.1 /TIER=FL /STK=2 /UG=Mm.3193 /LL=18767 /DEF=Mus musculus protein kinase inhibitor, alpha (Pkia), mRNA. /PROD=protein kinase inhibitor, alpha /FL=gb:M63554.1 gb:NM_008862.1
1428657_at	1244	393	0.32	Rreb1	Ras responsive element binding protein 1	1452862_at					gb:AK004146.1 /DB_XREF=gi:12835218 /FEA=mRNA /CNT=89 /TID=Mm.37369.1 /TIER=Stack /STK=27 /UG=Mm.37369 /LL=68750 /UG_GENE=1110037N09Rik /UG_TITLE=RIKEN cDNA 1110037N09 gene /DEF=Mus musculus 18 days embryo whole body cDNA, RIKEN full-length enriched library, clone:1110037N09:hypothetical protein, full insert sequence.
1433847_at	3123	1045	0.33	D330017J20Rik	RIKEN cDNA D330017J20 gene						gb:BB098407 /DB_XREF=gi:15407873 /DB_XREF=BB098407 /CLONE=9430063M07 /FEA=EST /CNT=64 /TID=Mm.56097.1 /TIER=Stack /STK=57 /UG=Mm.56097 /UG_TITLE=ESTs, Weakly similar to F10E7.8.p (Caenorhabditis elegans) (C.elegans)
1428717_at	2438	796	0.33	Scrn1	Secernin 1	1439500_at	1428718_at				gb:AK012765.1 /DB_XREF=gi:12849721 /FEA=mRNA /CNT=66 /TID=Mm.41557.1 /TIER=Stack /STK=24 /UG=Mm.41557 /LL=69938 /UG_GENE=2810019K23Rik /UG_TITLE=RIKEN cDNA 2810019K23 gene /DEF=Mus musculus 10, 11 days embryo whole body cDNA, RIKEN full-length enriched library, clone:2810019K23:homolog to HYPOTHETICAL PROTEIN KIAA0193, full insert sequence.
1439397_at	2423	798	0.33	BB164513	Expressed sequence BB164513						gb:BB164513 /DB_XREF=gi:8820454 /DB_XREF=BB164513 /CLONE=A130078F14 /FEA=EST /CNT=8 /TID=Mm.128312.1 /TIER=Stack /STK=8 /UG=Mm.128312 /LL=99456 /UG_GENE=BB164513 /UG_TITLE=expressed sequence BB164513
1437302_at	783	18	0.02	Adrb2	Adrenergic receptor, beta 2						gb:AV083350 /DB_XREF=gi:16381227 /DB_XREF=AV083350 /CLONE=2310002E14 /FEA=EST /CNT=39 /TID=Mm.5598.1 /TIER=Stack /STK=20 /UG=Mm.5598 /UG_TITLE=ESTs, Highly similar to BETA-2 ADRENERGIC RECEPTOR (M.musculus)
1437781_at	524	20	0.04		Transcribed locus						gb:BB180869 /DB_XREF=gi:16270031 /DB_XREF=BB180869 /CLONE=A230087K08 /FEA=EST /CNT=16 /TID=Mm.114886.1 /TIER=Stack /STK=14 /UG=Mm.114886 /UG_TITLE=ESTs
1421727_at	618	33	0.05	Eya1	Eyes absent 1 homolog (Drosophila)	1457424_at	1443117_at				gb:NM_010164.1 /DB_XREF=gi:6753791 /GEN=Eya1 /FEA=FLmRNA /CNT=2 /TID=Mm.13854.1 /TIER=FL /STK=2 /UG=Mm.13854 /LL=14048 /DEF=Mus musculus eyes absent 1 homolog (Drosophila) (Eya1), mRNA. /PROD=eyes absent 1 homolog (Drosophila) /FL=gb:U61110.1 gb:NM_010164.1
1425808_a_at	350	16	0.05	Myocd	Myocardin	1425978_at					gb:AF437877.1 /DB_XREF=gi:16904810 /GEN=BSAC2A /FEA=FLmRNA /CNT=6 /TID=Mm.32257.1 /TIER=FL /STK=1 /UG=Mm.32257 /DEF=Mus musculus myocardin A (BSAC2A) mRNA, complete cds, alternatively spliced. /PROD=myocardin A /FL=gb:AF437877.1
1430222_at	133	7	0.05								gb:BB538672 /DB_XREF=gi:9594172 /DB_XREF=BB538672 /CLONE=E130013B03 /FEA=mRNA /CNT=6 /TID=Mm.136979.1 /TIER=ConsEnd /STK=3 /UG=Mm.136979 /LL=74550 /UG_GENE=9130007G19Rik /UG_TITLE=RIKEN cDNA 9130007G19 gene
1451236_at	674	45	0.07	Rerg	RAS-like, estrogen-regulated, growth-inhibitor						gb:BC026463.1 /DB_XREF=gi:20072307 /FEA=FLmRNA /CNT=68 /TID=Mm.46233.1 /TIER=FL+Stack /STK=54 /UG=Mm.46233 /DEF=Mus musculus, Similar to RAS-like, estrogen-regulated, growth-inhibitor, clone MGC:31467 IMAGE:4483442, mRNA, complete cds. /PROD=Similar to RAS-like, estrogen-regulated,growth-inhibitor /FL=gb:BC026463.1
1417464_at	243	18	0.07	Tnnc2	Troponin C2, fast						gb:NM_009394.1 /DB_XREF=gi:6678370 /GEN=Tncs /FEA=FLmRNA /CNT=106 /TID=Mm.1716.1 /TIER=FL+Stack /STK=44 /UG=Mm.1716 /LL=21925 /DEF=Mus musculus troponin C, fast skeletal (Tncs), mRNA. /PROD=troponin C, fast skeletal /FL=gb:BC024390.1 gb:NM_009394.1
1439489_at	292	24	0.08	Gpr120	G protein-coupled receptor 120						gb:AV025152 /DB_XREF=gi:15431435 /DB_XREF=AV025152 /CLONE=1200010P16 /FEA=EST /CNT=14 /TID=Mm.35288.1 /TIER=ConsEnd /STK=7 /UG=Mm.35288 /LL=107221 /UG_GENE=AI552415 /UG_TITLE=expressed sequence AI552415
1427963_s_at	598	71	0.12								gb:BE979765 /DB_XREF=gi:10647008 /DB_XREF=UI-M-BG2-bbz-b-05-0-UI.s1 /CLONE=UI-M-BG2-bbz-b-05-0-UI /FEA=mRNA /CNT=16 /TID=Mm.221173.1 /TIER=Stack /STK=11 /UG=Mm.221173 /UG_TITLE=Mus musculus cis-retinolandrogen dehydrogenase type 3 mRNA, complete cds
1450352_at	369	45	0.12	Mtnr1a	Melatonin receptor 1A						gb:NM_008639.1 /DB_XREF=gi:6678953 /GEN=Mtnr1a /FEA=FLmRNA /CNT=2 /TID=Mm.5133.1 /TIER=FL /STK=2 /UG=Mm.5133 /LL=17773 /DEF=Mus musculus melatonin receptor 1A (Mtnr1a), mRNA. /PROD=melatonin receptor 1A /FL=gb:NM_008639.1 gb:U52222.1
1422269_at	223	27	0.12	Insm2	Insulinoma-associated 2						gb:NM_020287.1 /DB_XREF=gi:9938005 /GEN=Insm2-pending /FEA=FLmRNA /CNT=2 /TID=Mm.103710.1 /TIER=FL /STK=1 /UG=Mm.103710 /LL=56856 /DEF=Mus musculus insulinoma-associated 2 (Insm2-pending), mRNA. /PROD=insulinoma-associated 2 /FL=gb:NM_020287.1
1456344_at	164	20	0.12	Tnc	Tenascin C						gb:BB003393 /DB_XREF=gi:16214791 /DB_XREF=BB003393 /CLONE=4732454O18 /FEA=EST /CNT=13 /TID=Mm.209039.1 /TIER=Stack /STK=11 /UG=Mm.209039 /UG_TITLE=ESTs, Weakly similar to Tenascin (H.sapiens)
1436557_at	310	40	0.13	BC067067	CDNA sequence BC067067						gb:BM936589 /DB_XREF=gi:19395741 /DB_XREF=UI-M-CG0p-bqi-h-04-0-UI.r1 /CLONE=UI-M-CG0p-bqi-h-04-0-UI /FEA=EST /CNT=16 /TID=Mm.38266.1 /TIER=Stack /STK=8 /UG=Mm.38266 /UG_TITLE=ESTs, Weakly similar to keratin complex 2, gene 6g (Mus musculus) (M.musculus)
1440335_at	230	30	0.13	Pitpnc1	Phosphatidylinositol transfer protein, cytoplasmic 1						gb:AV020525 /DB_XREF=gi:4797517 /DB_XREF=AV020525 /CLONE=1190018D07 /FEA=EST /CNT=7 /TID=Mm.24175.1 /TIER=ConsEnd /STK=5 /UG=Mm.24175 /UG_TITLE=ESTs
1424097_at	898	130	0.14	Elovl7	ELOVL family member 7, elongation of long chain fatty acids (yeast)	1440312_at	1424098_at	1440354_at	1441891_x_at		gb:BC005602.1 /DB_XREF=gi:13542798 /FEA=FLmRNA /CNT=102 /TID=Mm.41397.1 /TIER=FL+Stack /STK=54 /UG=Mm.41397 /LL=74559 /UG_GENE=9130013K24Rik /DEF=Mus musculus, RIKEN cDNA 9130013K24 gene, clone MGC:7217 IMAGE:3483017, mRNA, complete cds. /PROD=RIKEN cDNA 9130013K24 gene /FL=gb:BC005602.1
1426225_at	833	120	0.14	Rbp4	Retinol binding protein 4, plasma						gb:U63146.1 /DB_XREF=gi:1515449 /GEN=RBP /FEA=FLmRNA /CNT=137 /TID=Mm.2605.1 /TIER=FL+Stack /STK=45 /UG=Mm.2605 /LL=19662 /DEF=Mus musculus retinol binding protein (RBP) mRNA, complete cds. /PROD=retinol binding protein /FL=gb:U63146.1
1450131_a_at	355	50	0.14	Bspry	B-box and SPRY domain containing						gb:NM_138653.1 /DB_XREF=gi:20149729 /GEN=Bspry-pending /FEA=FLmRNA /CNT=30 /TID=Mm.29808.1 /TIER=FL /STK=2 /UG=Mm.29808 /LL=192120 /DEF=Mus musculus B-box and SPRY domain containing (Bspry-pending), mRNA. /PROD=B-box and SPRY domain containing /FL=gb:NM_138653.1
1441091_at	348	48	0.14		Transcribed locus						gb:BQ175164 /DB_XREF=gi:20350656 /DB_XREF=UI-M-DJ2-bwd-b-06-0-UI.s1 /CLONE=UI-M-DJ2-bwd-b-06-0-UI /FEA=EST /CNT=9 /TID=Mm.212628.1 /TIER=ConsEnd /STK=4 /UG=Mm.212628 /UG_TITLE=ESTs, Weakly similar to TYROSINE-PROTEIN KINASE JAK3 (M.musculus)
1449609_at	875	132	0.15		Transcribed locus						gb:AA189214 /DB_XREF=gi:1776815 /DB_XREF=mu50b07.r1 /CLONE=IMAGE:642805 /FEA=EST /CNT=3 /TID=Mm.24066.1 /TIER=ConsEnd /STK=1 /UG=Mm.24066 /UG_TITLE=ESTs
1435351_at	702	108	0.15	2310026E23Rik	RIKEN cDNA 2310026E23 gene						gb:AA189197 /DB_XREF=gi:1776807 /DB_XREF=mu46h10.r1 /CLONE=IMAGE:642499 /FEA=EST /CNT=41 /TID=Mm.45533.1 /TIER=Stack /STK=17 /UG=Mm.45533 /UG_TITLE=ESTs, Weakly similar to collagen (Caenorhabditis elegans) (C.elegans)
1449031_at	848	132	0.16	Cited1	Cbp/p300-interacting transactivator with Glu/Asp-rich carboxy-terminal domain 1						gb:U65091.1 /DB_XREF=gi:1854000 /GEN=msg1 /FEA=FLmRNA /CNT=47 /TID=Mm.2390.1 /TIER=FL+Stack /STK=26 /UG=Mm.2390 /LL=12705 /DEF=Mus musculus melanocyte-specific gene 1 (msg1) mRNA, complete cds. /PROD=melanocyte-specific gene 1 /FL=gb:U65091.1 gb:NM_007709.1
1415959_at	160	26	0.16	Slc2a4	Solute carrier family 2 (facilitated glucose transporter), member 4						gb:AB008453.1 /DB_XREF=gi:9392289 /GEN=GLUT4 /FEA=FLmRNA /CNT=210 /TID=Mm.10661.1 /TIER=FL /STK=1 /UG=Mm.10661 /LL=20528 /DEF=Mus musculus GLUT4 mRNA for Glucose transporter 4, complete cds. /PROD=Glucose transporter 4 /FL=gb:NM_009204.1 gb:AB008453.1 gb:M23383.1 gb:BC014282.1
1453074_at	824	138	0.17	Dusp23	Dual specificity phosphatase 23						gb:AK004912.1 /DB_XREF=gi:12836454 /FEA=mRNA /CNT=29 /TID=Mm.33024.1 /TIER=Stack /STK=8 /UG=Mm.33024 /LL=68440 /UG_GENE=1300005N15Rik /UG_TITLE=RIKEN cDNA 1300005N15 gene /DEF=Mus musculus adult male liver cDNA, RIKEN full-length enriched library, clone:1300005N15:homolog to CDNA FLJ20442 FIS, CLONE KAT04828, full insert sequence.
1452386_at	668	113	0.17								gb:X97581.1 /DB_XREF=gi:1296844 /GEN=msa1 /FEA=mRNA /CNT=13 /TID=Mm.5089.1 /TIER=Stack /STK=11 /UG=Mm.5089 /LL=20689 /DEF=M.musculus mRNA for spalt transcription factor. /PROD=spalt protein
1416627_at	634	110	0.17	Spint1	Serine protease inhibitor, Kunitz type 1						gb:NM_016907.1 /DB_XREF=gi:8394350 /GEN=Spint1 /FEA=FLmRNA /CNT=126 /TID=Mm.104955.1 /TIER=FL+Stack /STK=77 /UG=Mm.104955 /LL=20732 /DEF=Mus musculus serine protease inhibitor, Kunitz type 1 (Spint1), mRNA. /PROD=serine protease inhibitor, Kunitz type 1 /FL=gb:NM_016907.1 gb:AF099018.1 gb:BC005769.1
1440807_at	526	92	0.17			1454855_at					gb:BB337886 /DB_XREF=gi:9046649 /DB_XREF=BB337886 /CLONE=B930010F20 /FEA=EST /CNT=5 /TID=Mm.132480.1 /TIER=ConsEnd /STK=5 /UG=Mm.132480 /UG_TITLE=ESTs
1457063_at	335	58	0.17	9530033F24Rik	RIKEN cDNA 9530033F24 gene						gb:AI447357 /DB_XREF=gi:4303423 /DB_XREF=mq60d07.x1 /CLONE=IMAGE:583117 /FEA=EST /CNT=10 /TID=Mm.133075.1 /TIER=ConsEnd /STK=5 /UG=Mm.133075 /UG_TITLE=ESTs
1452995_at	236	41	0.17	Nudt17	Nudix (nucleoside diphosphate linked moiety X)-type motif 17						gb:AK019109.1 /DB_XREF=gi:12859144 /FEA=mRNA /CNT=19 /TID=Mm.65359.1 /TIER=Stack /STK=14 /UG=Mm.65359 /LL=78373 /UG_GENE=2410015C20Rik /UG_TITLE=RIKEN cDNA 2410015C20 gene /DEF=Mus musculus ES cells cDNA, RIKEN full-length enriched library, clone:2410015C20:hypothetical protein, full insert sequence.
1419725_at	174	30	0.17	Slc26a4	Solute carrier family 26, member 4						gb:NM_011867.1 /DB_XREF=gi:6755021 /GEN=Slc26a4 /FEA=FLmRNA /CNT=9 /TID=Mm.100187.1 /TIER=FL /STK=7 /UG=Mm.100187 /LL=23985 /DEF=Mus musculus solute carrier family 26, member 4 (Slc26a4), mRNA. /PROD=pendrin /FL=gb:NM_011867.1 gb:AF167411.1
1453808_at	245	45	0.18	2210416O15Rik	RIKEN cDNA 2210416O15 gene						gb:AK008958.1 /DB_XREF=gi:12843459 /FEA=mRNA /CNT=7 /TID=Mm.82670.1 /TIER=ConsEnd /STK=0 /UG=Mm.82670 /LL=70393 /UG_GENE=2210416O15Rik /UG_TITLE=RIKEN cDNA 2210416O15 gene /DEF=Mus musculus adult male stomach cDNA, RIKEN full-length enriched library, clone:2210416O15:hypothetical protein, full insert sequence.
1422919_at	518	101	0.19	Hrasls	HRAS-like suppressor	1428991_at					gb:NM_013751.1 /DB_XREF=gi:7305156 /GEN=Hrasrs-pending /FEA=FLmRNA /CNT=11 /TID=Mm.103650.1 /TIER=FL /STK=7 /UG=Mm.103650 /LL=27281 /DEF=Mus musculus Harvey rat sarcoma virus oncogene relatedsuppressor (Hrasrs-pending), mRNA. /PROD=Harvey rat sarcoma virus oncogenerelatedsuppressor /FL=gb:NM_013751.1 gb:AF163095.1
1421179_at	339	66	0.19	Ttyh2	Tweety homolog 2 (Drosophila)	1434500_at					gb:NM_053273.1 /DB_XREF=gi:16716610 /GEN=Ttyh2 /FEA=FLmRNA /CNT=18 /TID=Mm.41871.1 /TIER=FL /STK=2 /UG=Mm.41871 /LL=117160 /DEF=Mus musculus tweety homolog 2 (Drosophila) (Ttyh2), mRNA. /PROD=tweety homolog 2 (Drosophila) /FL=gb:NM_053273.1 gb:AF329682.1
1429419_at	659	131	0.2	2310007A19Rik	RIKEN cDNA 2310007A19 gene						gb:AK009192.1 /DB_XREF=gi:12843834 /FEA=mRNA /CNT=25 /TID=Mm.46405.1 /TIER=Stack /STK=23 /UG=Mm.46405 /LL=66353 /UG_GENE=2310007A19Rik /UG_TITLE=RIKEN cDNA 2310007A19 gene /DEF=Mus musculus adult male tongue cDNA, RIKEN full-length enriched library, clone:2310007A19:hypothetical protein, full insert sequence.
